# Supplementary material for: Emerging investigator series: open dumping and burning: an overlooked source of terrestrial microplastics in underserved communities
Source: Royal Society of Chemistry journal article supplement (doi:10.1039/d4em00439f), 2024-10-21
Supplement: d4em00439f1.pdf [file d4em00439f1.pdf]

## **SUPPLEMENTARY INFORMATION OF “OPEN DUMPING AND BURNING: AN OVERLOOKED SOURCE OF TERRESTRIAL MICROPLASTICS IN UNDERSERVED COMMUNITIES”**

Kendra Z. Hess<sup>1</sup>, Xuewen Wang<sup>1</sup>, Justin Scott, Andrea Arredondo Navarro, Gwen Tipling<sup>1</sup>, Jesse Jones<sup>1</sup>, Victoria Hughes<sup>1</sup>, Kyle R. Forsythe<sup>1</sup>, Melissa Mata,<sup>1</sup> Matteo Minghetti<sup>2</sup>, Andrea Jilling<sup>3</sup>, Christine Martin<sup>4</sup>, John Doyle<sup>4</sup>, Eliane El Hayek<sup>5</sup>, José M. Cerrato<sup>6</sup>, Jorge Gonzalez-Estrella<sup>1\*</sup>

<sup>1</sup>School of Civil & Environmental Engineering, 248 Engineering North, Oklahoma State University, Stillwater, Oklahoma, USA 74078

<sup>2</sup>Department of Integrative Biology, Oklahoma State University, Stillwater, Oklahoma, USA, 74078

<sup>3</sup> Department of Environmental Health Sciences, University of South Carolina, Columbia, SC 29201 USA

<sup>4</sup> Little Bighorn College, Crow Agency, MT 59022

<sup>6</sup>Department of Pharmaceutical Sciences, MSC09 5360, University of New Mexico, College of Pharmacy, Albuquerque, New Mexico 87131, USA

<sup>5</sup>Department of Civil, Construction & Environmental Engineering, MSC01 1070, University of New Mexico, Albuquerque, New Mexico 87131, USA

\*Corresponding author: Jorge Gonzalez-Estrella; email: [jorgego@okstate.edu](mailto:jorgego@okstate.edu).

## **Table of Contents.**

### **Tables**

|                                                                                     |           |
|-------------------------------------------------------------------------------------|-----------|
| Table S1: Soil and Site Characteristics of Sampled Sites                            | Page S4   |
| Table S2: Thermally Oxidized Plastics Spectral Library                              | Page S5   |
| Table S3: Sampling Coordinates of sampling sites                                    | Page S10  |
| Table S4: Particle Quantification                                                   | Page S11  |
| Table S5: Lab Controls and Background Sites Quantification                          | Page S12  |
| Table S6: Tuttle Oklahoma Burn Site Stereomicroscopy & Fluorescence Microscopy      | Page S13  |
| Table S7: Crow Agency Burn Site Stereomicroscopy & Fluorescence Microscopy          | Page S21  |
| Table S8: Lodge Grass Dump Site Stereomicroscopy & Fluorescence Microscopy          | Page S29  |
| Table S9: Lab Control & Background Sites Stereomicroscopy & Fluorescence Microscopy | Page S36  |
| Table S10: ATR-FTIR Spectral Matches from Tuttle Oklahoma Burn Site 0-9 cm Depth    | Page S41  |
| Table S11: ATR-FTIR Spectral Matches from Tuttle Oklahoma Burn Site 9-18 cm Depth   | Page S42  |
| Table S12: ATR-FTIR Spectral Matches from Crow Agency Burn Site 0-9 cm Depth        | Page S43  |
| Table S13: ATR-FTIR Spectral Matches from Crow Agency Burn Site 9-18 cm Depth       | Page S44  |
| Table S14: ATR-FTIR Spectral Matches from Lodge Grass Dump Site 0-9 cm Depth        | Page S45  |
| Table S15: ATR-FTIR Spectral Matches from Lodge Grass Dump Site 9-18 cm Depth       | Page S46  |
| Table S16: ATR-FTIR Spectral Matches from Lab Control and Background Sites          | Page S47  |
| Table S17: Tuttle Oklahoma Burn Site ATR-FTIR Particle and Spectra Images           | Page S48  |
| Table S18: Crow Agency Burn Site ATR-FTIR Particle and Spectra Images               | Page S60  |
| Table S19: Lodge Grass Dump Site ATR-FTIR Particle and Spectra Images               | Page S82  |
| Table S20: Lab Control and Background Sites ATR-FTIR Particle and Spectra Images    | Page S106 |
| Table S21: Statistical Analysis of Particle Counts                                  | Page S112 |

### **Figures**

|                                                        |         |
|--------------------------------------------------------|---------|
| Fig. S1: Aerial view of burn sites and sampling points | Page S3 |
|--------------------------------------------------------|---------|

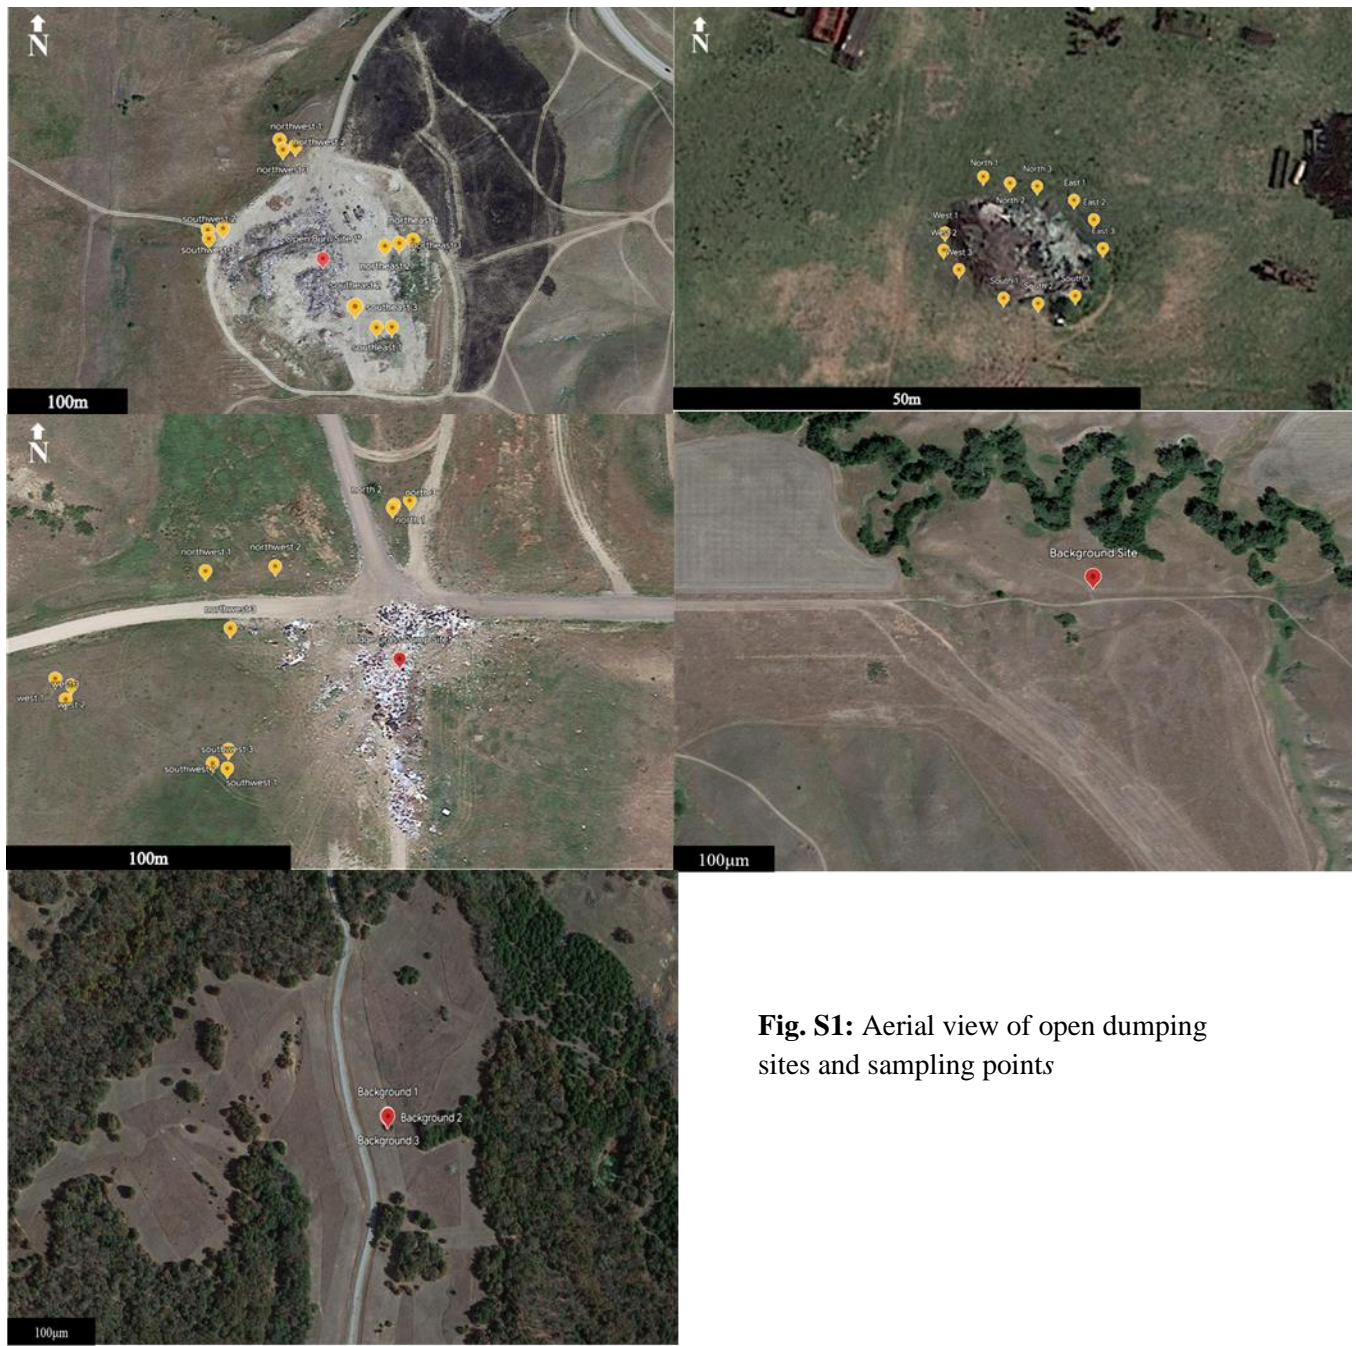

**Fig. S1:** Aerial view of open dumping sites and sampling points

**Table S1.** Soil and Site Characteristics of Sampled Sites

| Site                                | MAT (°C) | MAP (mm) | Texture Class   | Sand (%) | Silt (%) | Clay (%) | Organic Matter (%) | Soil Series           | Soil Taxonomy                                       | Area (m <sup>2</sup> ) |
|-------------------------------------|----------|----------|-----------------|----------|----------|----------|--------------------|-----------------------|-----------------------------------------------------|------------------------|
| Background - Lodge Grass & Crow     | 8        | 390      | Loam            | 42.5     | 40.0     | 17.5     | 9.4                | Lohmiller<br>Haverson | Torrertic<br>Ustifluvents<br>Aridic<br>Ustifluvents | -                      |
| Lodge Grass dump site - North       | 10       | 450      | Sandy Loam      | 57.5     | 23.8     | 18.8     | 2.6                | Farnuf                | Typic<br>Argiustolls                                | 35,929                 |
| Lodge Grass dump site - Northwest   |          |          | Sandy Clay Loam | 47.5     | 27.5     | 25.0     | 3.2                |                       |                                                     |                        |
| Lodge Grass dump site - West        |          |          | Loam            | 50.0     | 28.8     | 21.3     | 2.3                |                       |                                                     |                        |
| Lodge Grass dump site - Southwest   |          |          | Loam            | 45.0     | 31.3     | 23.8     | 4.4                |                       |                                                     |                        |
| Crow Agency burn site 1 - Northeast | 8        | 390      | Clay            | 27.5     | 1.3      | 71.3     | 2.5                | Colby                 | Aridic<br>Ustorthents                               | 32,284                 |
| Crow Agency burn site 1 - Northwest |          |          | Clay Loam       | 37.5     | 22.5     | 40.0     | 2.4                |                       |                                                     |                        |
| Crow Agency burn site 1 - Southwest |          |          | Sandy Clay Loam | 47.5     | 26.3     | 26.3     | 4.7                |                       |                                                     |                        |
| Crow Agency burn site 1 - Southeast |          |          | Clay            | 22.5     | 36.3     | 41.3     | 5.1                |                       |                                                     |                        |
| Background - Single Family          |          |          | Sandy Loam      | 55.0     | 32.5     | 12.5     | 4.7                | Lucien<br>Grainola    | Udic<br>Haplustolls<br>Udertic<br>Haplustalfs       | -                      |
| Single Family dump site - North     | 15.3     | 932      | Loam            | 45.0     | 36.3     | 18.8     | 7.9                | Zaneis                | Udic<br>Argiustolls                                 | 207                    |
| Single Family dump site - West      |          |          | Loam            | 50.0     | 31.3     | 18.8     | 8.6                |                       |                                                     |                        |
| Single Family dump site - South     |          |          | Sandy Loam      | 52.5     | 31.3     | 16.3     | 10.1               |                       |                                                     |                        |
| Single Family dump site - East      |          |          | Loam            | 50.0     | 33.8     | 16.3     | 7.3                |                       |                                                     |                        |

**Table S2: Thermally Oxidized Plastics Spectral Library**

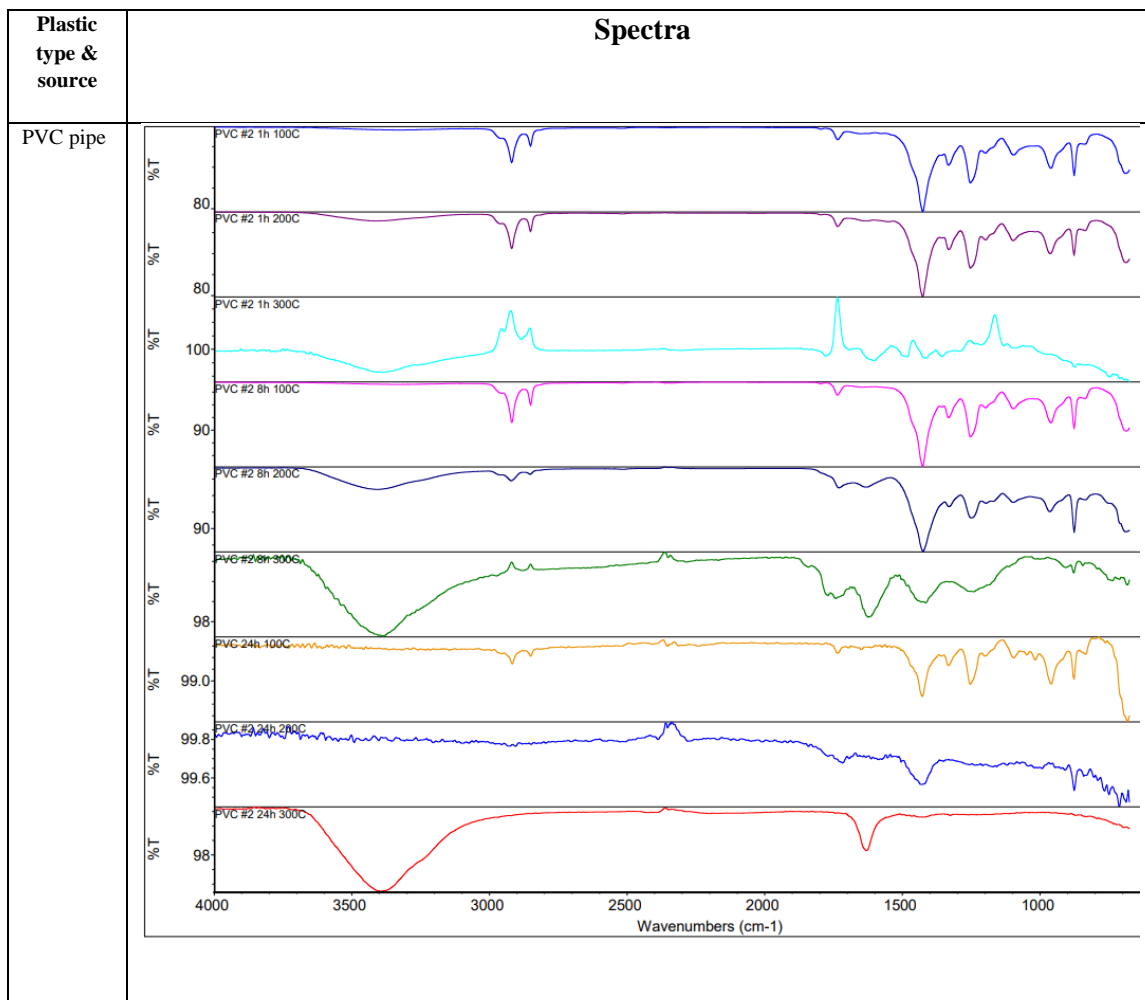

*Continued on the following pages*

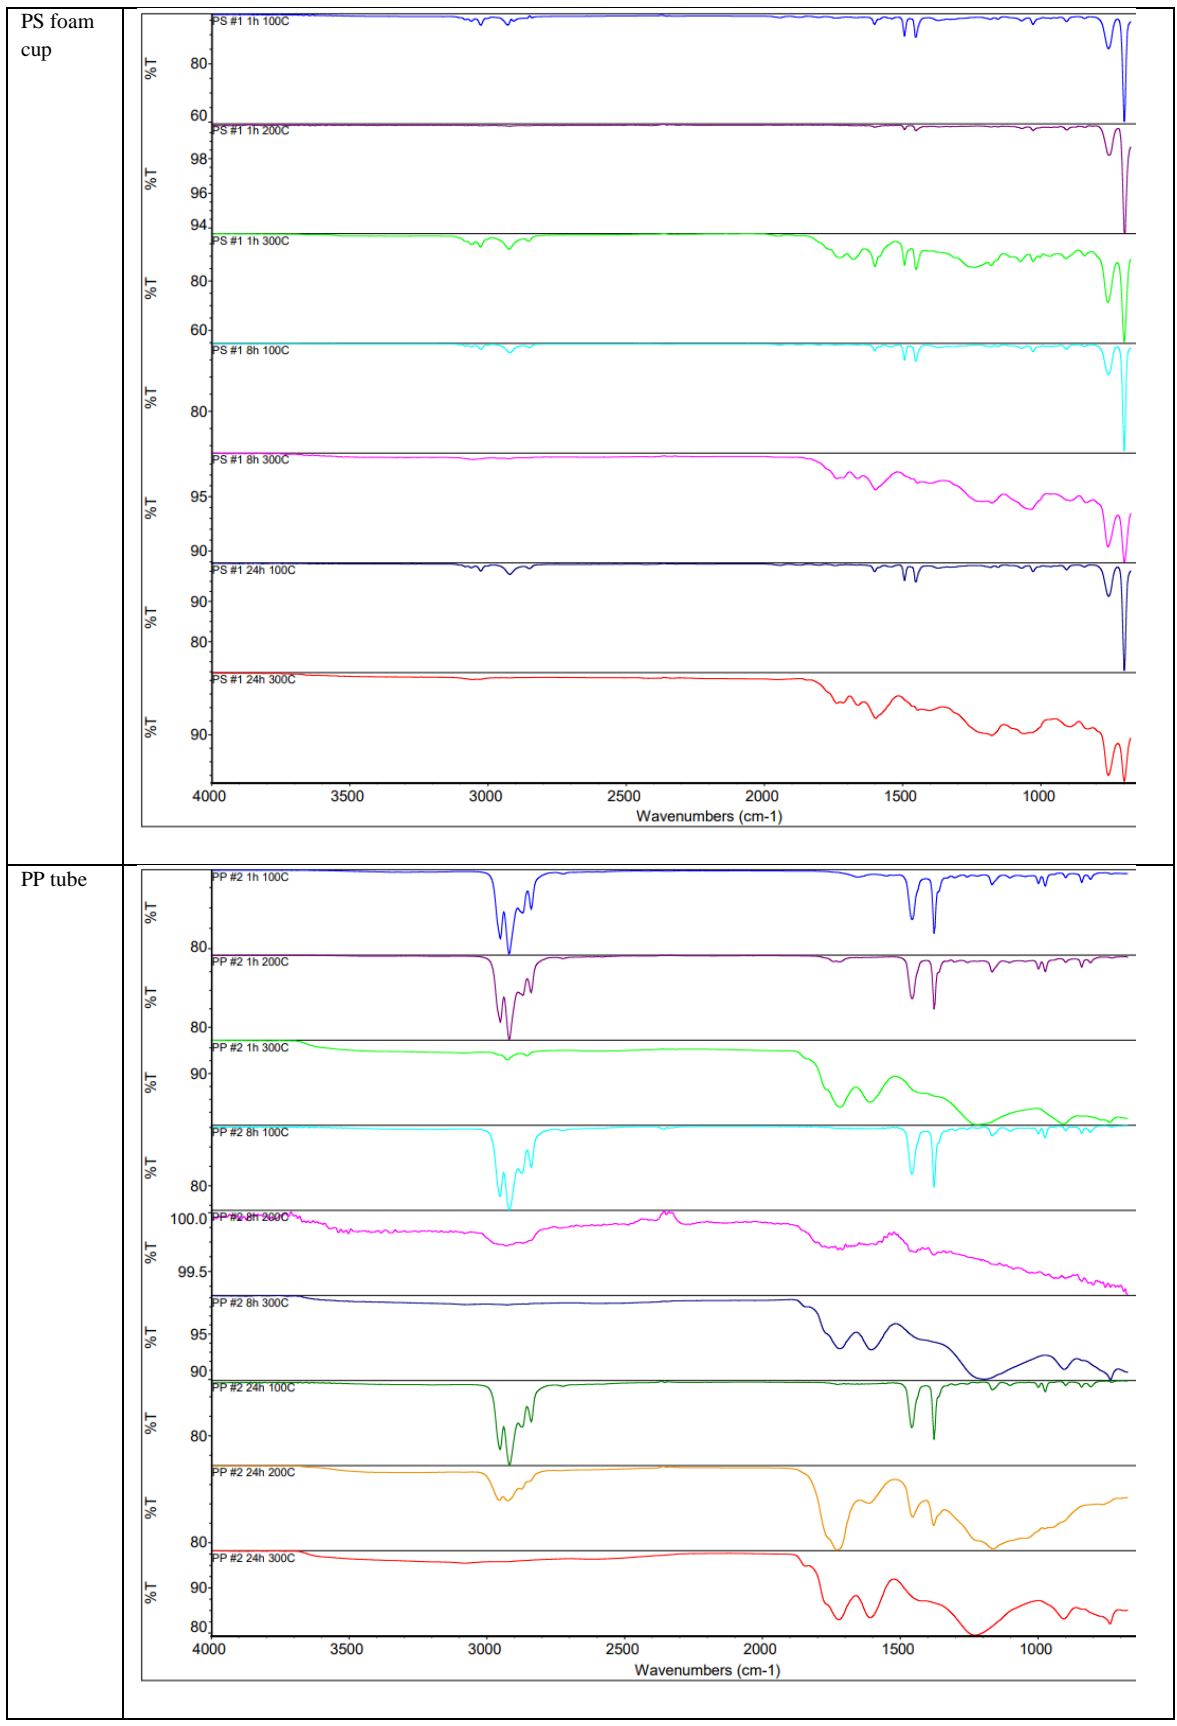

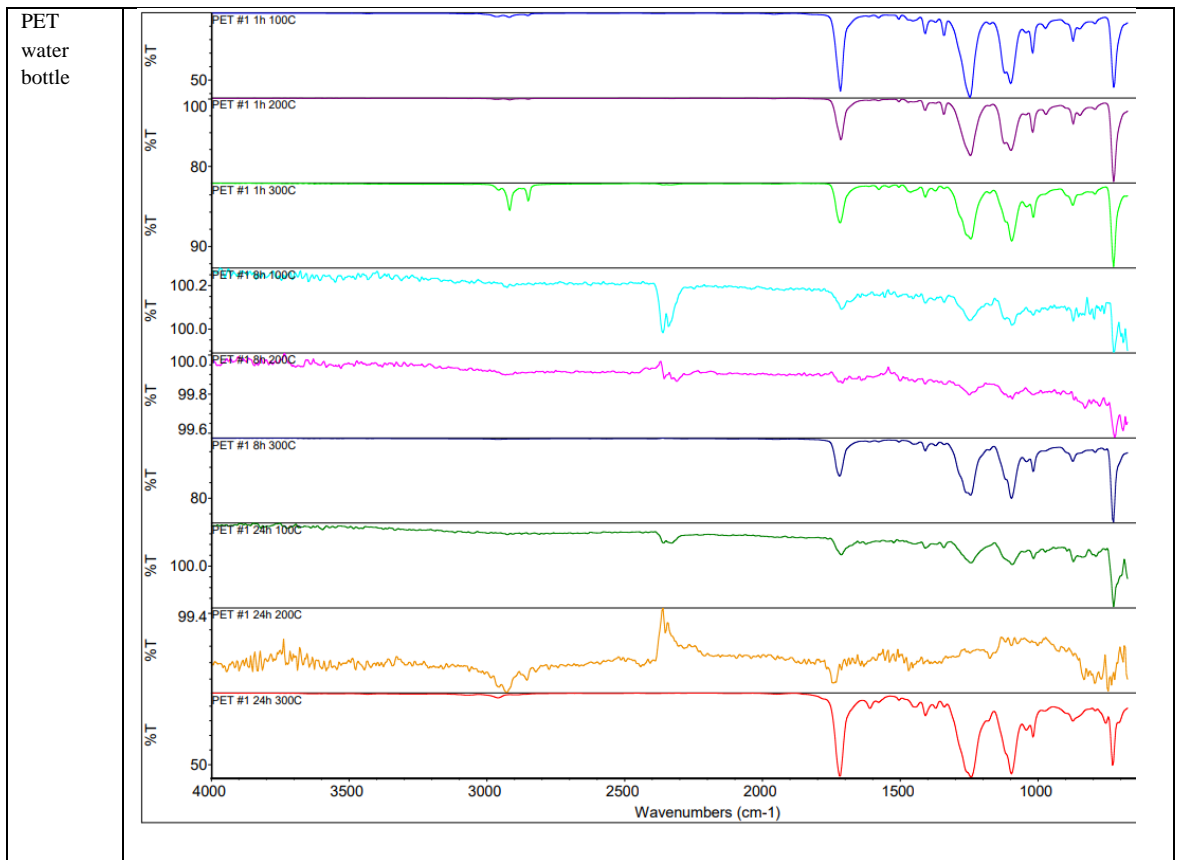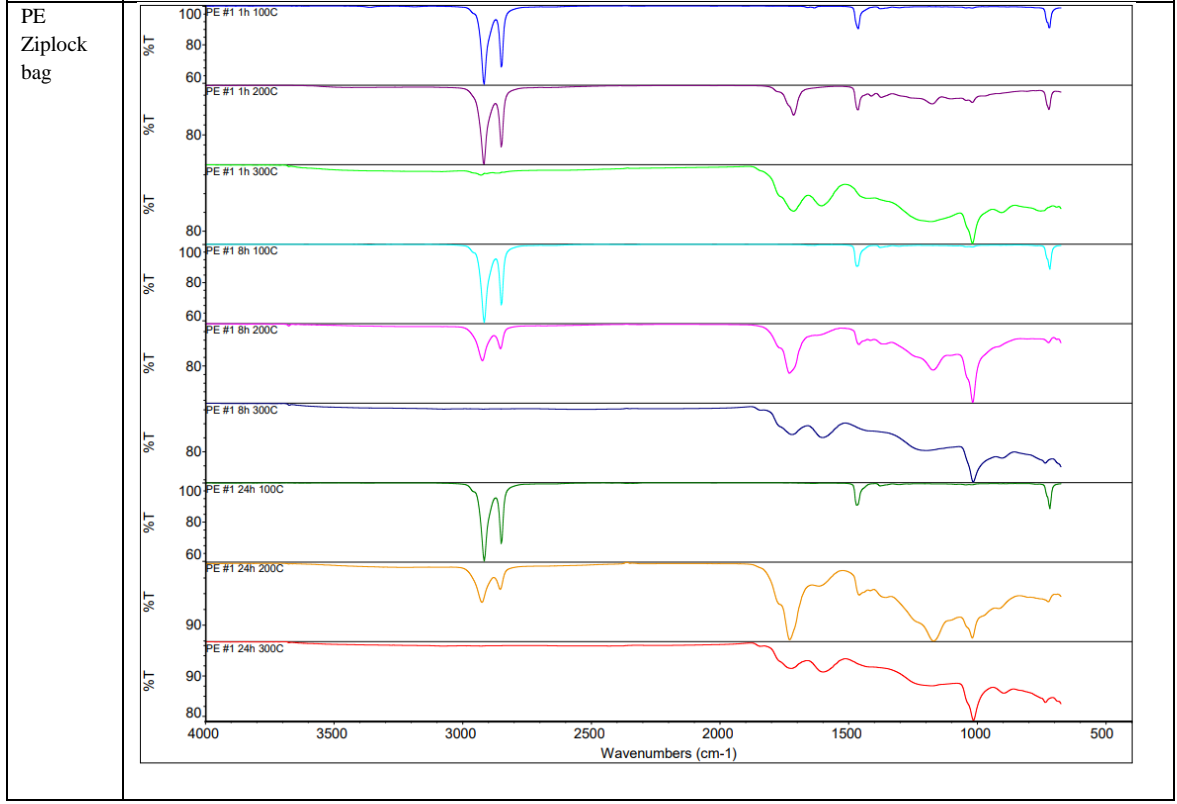

LLDPE  
plastic  
wrap

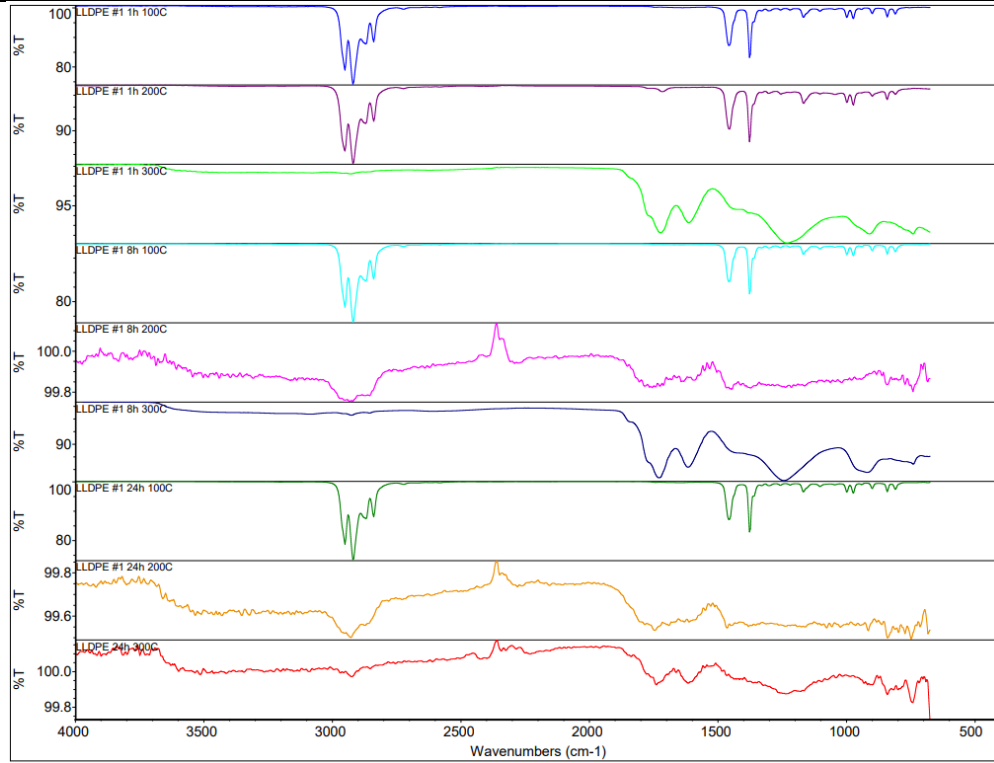

LDPE  
packaging  
bag

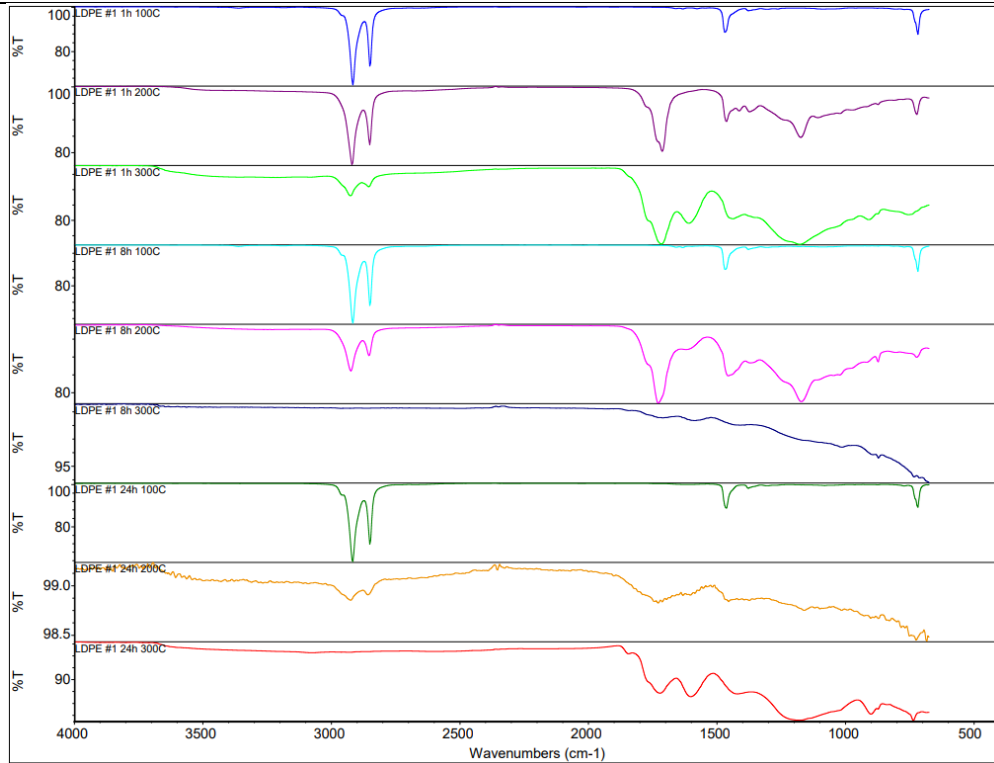



HDPE  
produce  
bag

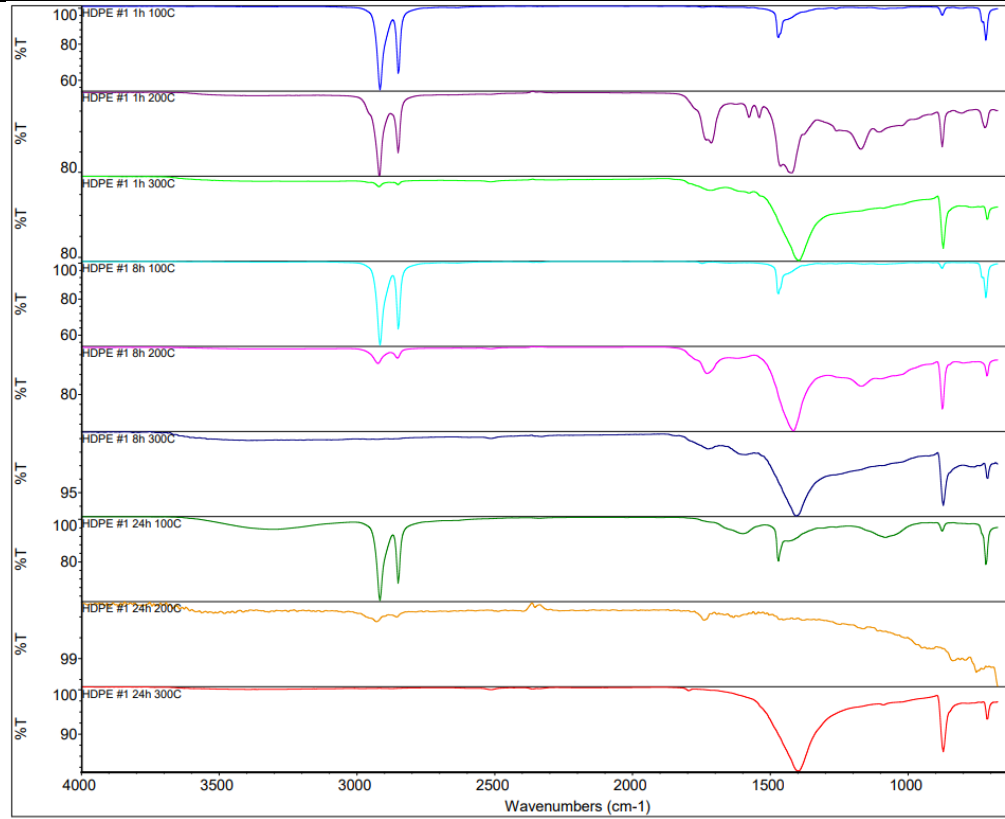

CV  
pillow fill

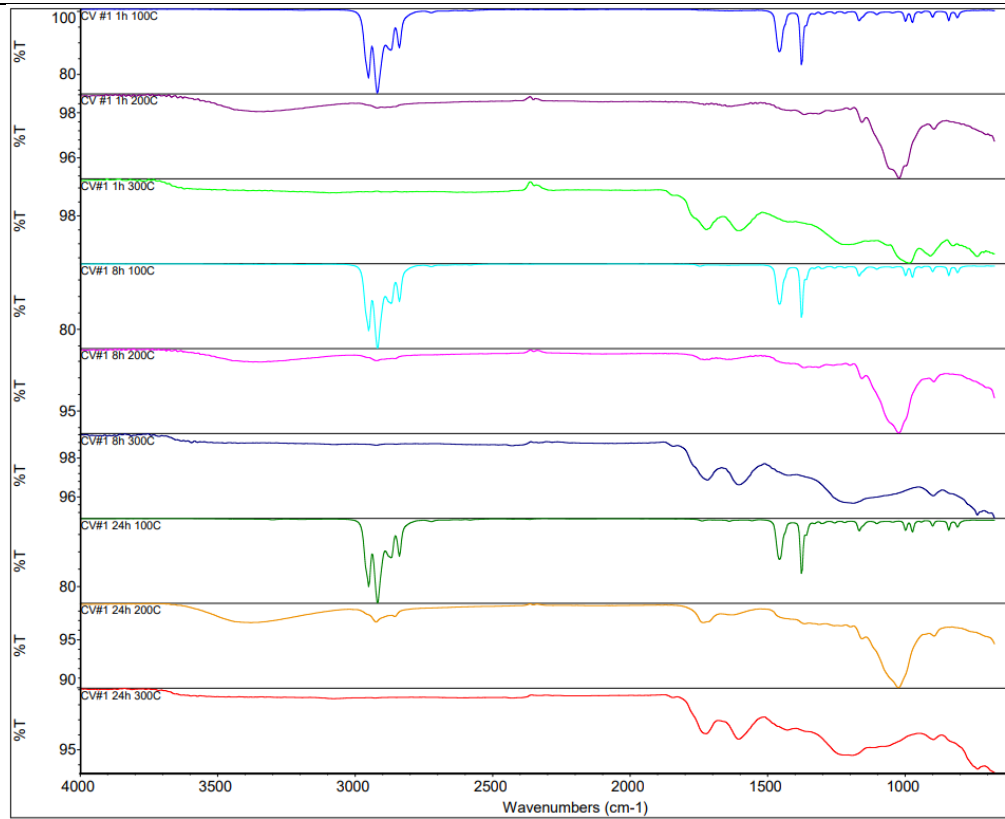

**Table S3: Sampling Coordinates**

| <b>Quadrant</b>                         | <b>Latitude</b> | <b>Longitude</b> |
|-----------------------------------------|-----------------|------------------|
| <b>Crow Agency</b>                      |                 |                  |
| NW                                      | 45.6008580      | -107.471354      |
|                                         | 45.6007900      | -107.471478      |
|                                         | 45.6007660      | -107.471488      |
| NE                                      | 45.6001170      | -107.470248      |
|                                         | 45.6001330      | -107.470272      |
|                                         | 45.6001250      | -107.470233      |
| SW                                      | 45.6002470      | -107.472257      |
|                                         | 45.6001320      | -107.472289      |
|                                         | 45.6002176      | -107.471832      |
| SE                                      | 45.5994890      | -107.470479      |
|                                         | 45.5995260      | -107.470434      |
|                                         | 45.5994991      | -107.470480      |
| <b>Lodge Grass</b>                      |                 |                  |
| <b>Quadrant</b>                         | <b>Latitude</b> | <b>Longitude</b> |
| N                                       | 45.3037820      | -107.3710730     |
|                                         | 45.3037537      | -107.3709180     |
|                                         | 45.3037537      | -107.3709188     |
| NW                                      | 45.3035300      | -107.3718140     |
|                                         | 45.3035011      | -107.3716261     |
|                                         | 45.3035011      | -107.3716261     |
| W                                       | 45.3032930      | -107.3724870     |
|                                         | 45.3033439      | -107.3722682     |
|                                         | 45.3033439      | -107.3722682     |
| SW                                      | 45.3032793      | -107.3716297     |
|                                         | 45.3031369      | -107.3716116     |
|                                         | 45.3031369      | -107.3716116     |
| <b>Tuttle Oklahoma</b>                  |                 |                  |
| Not provided for privacy protection     |                 |                  |
| <b>Background Site Crow/Lodge Grass</b> |                 |                  |
|                                         | 45.585739       | -107.437576      |
|                                         | 45.5856908      | -107.4375479     |
|                                         | 45.5856908      | -107.4375479     |

**Table S4: Particle Quantification**

| Lodge Grass Dump Site Quantification |                |                                                 |                      |                |                                                 |
|--------------------------------------|----------------|-------------------------------------------------|----------------------|----------------|-------------------------------------------------|
| Quadrant-Replicate #                 | Particle Count | Concentration (particles kg <sup>-1</sup> soil) | Quadrant-Replicate # | Particle Count | Concentration (particles kg <sup>-1</sup> soil) |
| <i>0-9 cm</i>                        |                |                                                 | <i>9-18 cm</i>       |                |                                                 |
| N-1*                                 | 149            | 14,900                                          | N-1                  | 367            | 36,700                                          |
| N-2                                  | 79             | 7,900                                           | N-2*                 | 692            | 69,200                                          |
| N-3                                  | 23             | 2,300                                           | N-3                  | 376            | 37,600                                          |
| NW-1                                 | 140            | 14,000                                          | NW-1                 | 50             | 5,000                                           |
| NW-2*                                | 350            | 35,000                                          | NW-2*                | 216            | 21,600                                          |
| NW-3                                 | 75             | 7,500                                           | NW-3                 | 104            | 10,400                                          |
| W-1*                                 | 287            | 28,700                                          | W-1                  | 132            | 13,200                                          |
| W-2                                  | 162            | 16,200                                          | W-2                  | 113            | 11,300                                          |
| W-3                                  | 134            | 13,400                                          | W-3*                 | 188            | 18,800                                          |
| SW-1                                 | 161            | 16,100                                          | SW-1                 | 173            | 17,300                                          |
| SW-2*                                | 318            | 31,800                                          | SW-2*                | 270            | 27,000                                          |
| SW-3                                 | 272            | 27,200                                          | SW-3                 | 199            | 19,900                                          |

  

| Crow Agency Burn Site Quantification |                |                                                 |                      |                |                                                 |
|--------------------------------------|----------------|-------------------------------------------------|----------------------|----------------|-------------------------------------------------|
| Quadrant-Replicate #                 | Particle Count | Concentration (particles kg <sup>-1</sup> soil) | Quadrant-Replicate # | Particle Count | Concentration (particles kg <sup>-1</sup> soil) |
| <i>0-9 cm</i>                        |                |                                                 | <i>9-18 cm</i>       |                |                                                 |
| NW-1                                 | 174            | 17,400                                          | NW-1*                | 215            | 21,500                                          |
| NW-2                                 | 60             | 6,000                                           | NW-2                 | 131            | 13,100                                          |
| NW-3*                                | 236            | 23,600                                          | NW-3                 | 207            | 20,700                                          |
| NE-1                                 | 93             | 9,300                                           | NE-1                 | 44             | 4,400                                           |
| NE-2*                                | 151            | 15,100                                          | NE-2*                | 136            | 13,600                                          |
| NE-3                                 | 54             | 5,400                                           | NE-3                 | 131            | 13,100                                          |
| SW-1                                 | 74             | 7,400                                           | SW-1*                | 165            | 16,500                                          |
| SW-2                                 | 176            | 17,600                                          | SW-2                 | 68             | 6,800                                           |
| SW-3*                                | 178            | 17,800                                          | SW-3                 | 91             | 9,100                                           |
| SE-1*                                | 216            | 21,600                                          | SE-1                 | 224            | 22,400                                          |
| SE-2                                 | 144            | 14,400                                          | SE-2*                | 329            | 32,900                                          |
| SE-3                                 | 212            | 21,200                                          | SE-3                 | 320            | 32,000                                          |

  

| Tuttle Oklahoma Site Quantification |                |                                                 |                      |                |                                                 |
|-------------------------------------|----------------|-------------------------------------------------|----------------------|----------------|-------------------------------------------------|
| Quadrant-Replicate #                | Particle Count | Concentration (particles kg <sup>-1</sup> soil) | Quadrant-Replicate # | Particle Count | Concentration (particles kg <sup>-1</sup> soil) |
| <i>0-9 cm</i>                       |                |                                                 | <i>9-18 cm</i>       |                |                                                 |
| West-1                              | 9              | 900                                             | West-1*              | 72             | 7,200                                           |
| West-2                              | 12             | 1,200                                           | West-2               | 12             | 1,200                                           |
| West-3*                             | 15             | 1,500                                           | West-3               | 23             | 2,300                                           |
| South-1                             | 17             | 1,700                                           | South-1              | 23             | 2,300                                           |
| South-2*                            | 19             | 1,900                                           | South-2*             | 195            | 19,500                                          |
| South-3                             | 11             | 1,100                                           | South-3              | 68             | 6,800                                           |

|          |     |        |          |    |       |
|----------|-----|--------|----------|----|-------|
| East-1   | n/a | n/a    | East-1   | 15 | 1,500 |
| East-2   | 27  | 2,700  | East-2   | 17 | 1,700 |
| East-3*  | 30  | 3,000  | East-3*  | 18 | 1,800 |
| North-1  | 19  | 1,900  | North-1  | 19 | 1,900 |
| North-2  | 31  | 3,100  | North-2  | 31 | 3,100 |
| North-3* | 123 | 12,300 | North-3* | 21 | 2,100 |

\*Selected as representative sample for ATR-FTIR analysis

**Table S5:** Lab Controls and Background Sites Quantification

| Sample Name-Replicate       | Particle Count | Concentration (particles kg <sup>-1</sup> soil) | Sample Name-Replicate      | Particle Count | Concentration (particles kg <sup>-1</sup> soil) |
|-----------------------------|----------------|-------------------------------------------------|----------------------------|----------------|-------------------------------------------------|
| <i>0-9 cm</i>               |                |                                                 | <i>9-18 cm</i>             |                |                                                 |
| Tuttle OK Background-Run 1  | 29             | 2,900                                           | Tuttle OK Background Run 1 | 34             | 3,400                                           |
| Tuttle OK Background- Run 2 | 15             | 1,500                                           | Tuttle OK Background Run 2 | 18             | 1,800                                           |
| Tuttle OK Background- Run 3 | 32             | 3,200                                           | Tuttle OK Background Run 3 | 40             | 4,000                                           |
| CABS & LG Background- Run 1 | 54             | 5,400                                           | CABS & LG Background Run 1 | 25             | 2,500                                           |
| CABS & LG Background- Run 2 | 6              | 600                                             | CABS & LG Background Run 2 | 23             | 2,300                                           |
| CABS & LG Background- Run 3 | 12             | 1,200                                           | CABS & LG Background Run 3 | 43             | 4,300                                           |
| <b>LAB CONTROLS</b>         |                |                                                 |                            |                |                                                 |
| Lab Control 1               | 21             | n/a                                             |                            |                |                                                 |
| Lab Control 2               | 46             | n/a                                             |                            |                |                                                 |
| Lab Control 3               | 23             | n/a                                             |                            |                |                                                 |

**Table S6.** Tuttle Oklahoma Burn Site Stereomicroscopy & Fluorescence Microscopy

|                 |                                                                                     |                                                                                      |
|-----------------|-------------------------------------------------------------------------------------|--------------------------------------------------------------------------------------|
| 0-9cm<br>West 1 |    |    |
| 0-9cm<br>West 2 |   |   |
| 0-9cm<br>West 3 |  |  |

|                          |                                                                                     |                                                                                      |
|--------------------------|-------------------------------------------------------------------------------------|--------------------------------------------------------------------------------------|
| <p>0-9cm<br/>South 1</p> | 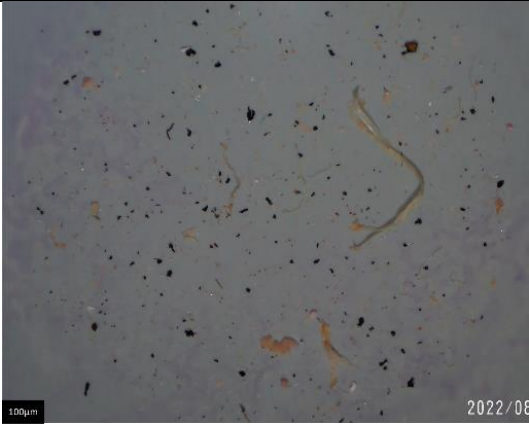   |    |
| <p>0-9cm<br/>South 2</p> |   |   |
| <p>0-9cm<br/>South 3</p> |  |  |

|                         |                                                                                     |                                                                                      |
|-------------------------|-------------------------------------------------------------------------------------|--------------------------------------------------------------------------------------|
| <p>0-9cm<br/>East 1</p> | 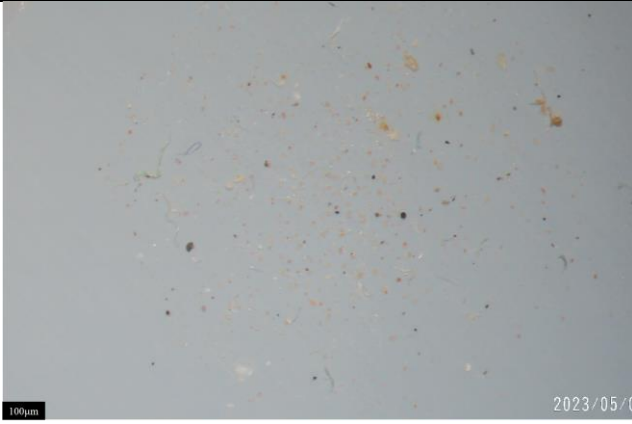   |    |
| <p>0-9cm<br/>East 2</p> |   |   |
| <p>0-9cm<br/>East 3</p> |  |  |

|                          |                                                                                     |                                                                                      |
|--------------------------|-------------------------------------------------------------------------------------|--------------------------------------------------------------------------------------|
| <p>0-9cm<br/>North 1</p> | 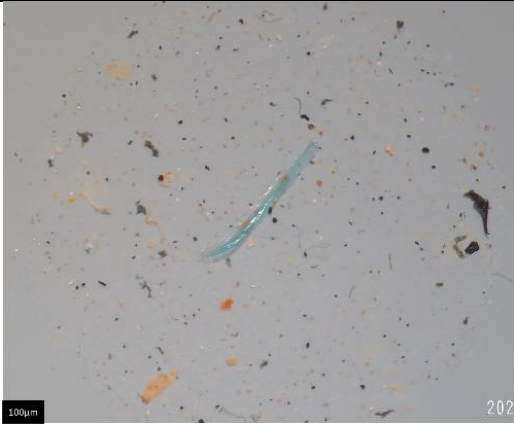   |    |
| <p>0-9cm<br/>North 2</p> |   |   |
| <p>0-9cm<br/>North 3</p> |  |  |



|                          |                                                                                     |                                                                                      |
|--------------------------|-------------------------------------------------------------------------------------|--------------------------------------------------------------------------------------|
| <p>9-18cm<br/>West 1</p> | 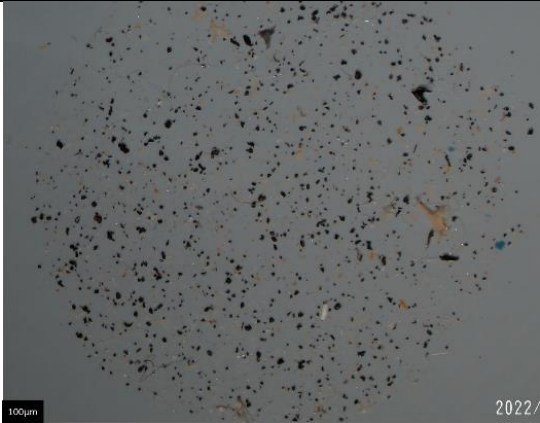   |    |
| <p>9-18cm<br/>West 2</p> |   |   |
| <p>9-18cm<br/>West 3</p> |  |  |

|                           |                                                                                     |                                                                                      |
|---------------------------|-------------------------------------------------------------------------------------|--------------------------------------------------------------------------------------|
| <p>9-18cm<br/>South 1</p> | 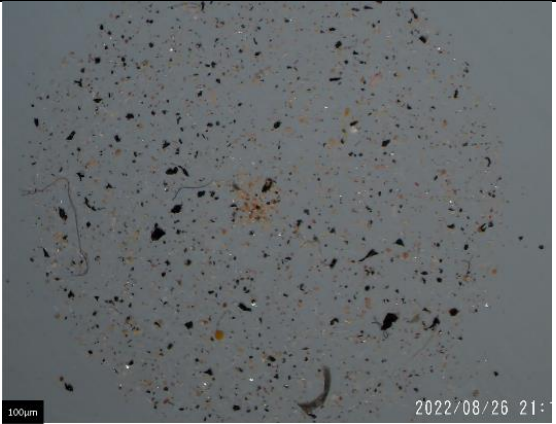   |    |
| <p>9-18cm<br/>South 2</p> |   |   |
| <p>9-18cm<br/>South 3</p> |  |  |

|                          |                                                                                     |                                                                                      |
|--------------------------|-------------------------------------------------------------------------------------|--------------------------------------------------------------------------------------|
| <p>9-18cm<br/>East 1</p> | 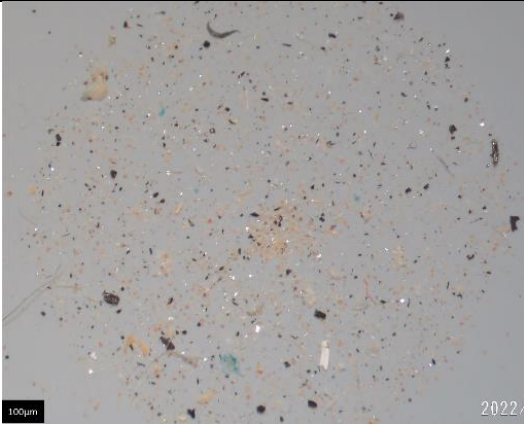   |    |
| <p>9-18cm<br/>East 2</p> |   |   |
| <p>9-18cm<br/>East 3</p> |  |  |

|                           |                                                                                     |                                                                                      |
|---------------------------|-------------------------------------------------------------------------------------|--------------------------------------------------------------------------------------|
| <p>9-18cm<br/>North 1</p> | 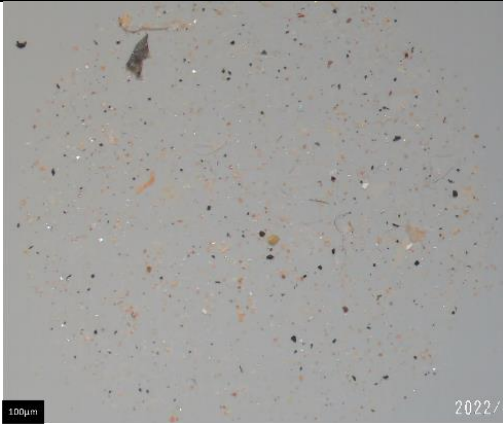   |    |
| <p>9-18cm<br/>North 2</p> |   |   |
| <p>9-18cm<br/>North 3</p> |  |  |

**Table S7.** Crow Agency Burn Site Stereomicroscopy & Fluorescence Microscopy

|               |                                                                                      |                                                                                       |
|---------------|--------------------------------------------------------------------------------------|---------------------------------------------------------------------------------------|
| 0-9cm<br>NW 1 |    |    |
| 0-9cm<br>NW 2 |   |   |
| 0-9cm<br>NW 3 |  |  |

|                       |                                                                                     |                                                                                       |
|-----------------------|-------------------------------------------------------------------------------------|---------------------------------------------------------------------------------------|
| <p>0-9cm<br/>NE 1</p> | 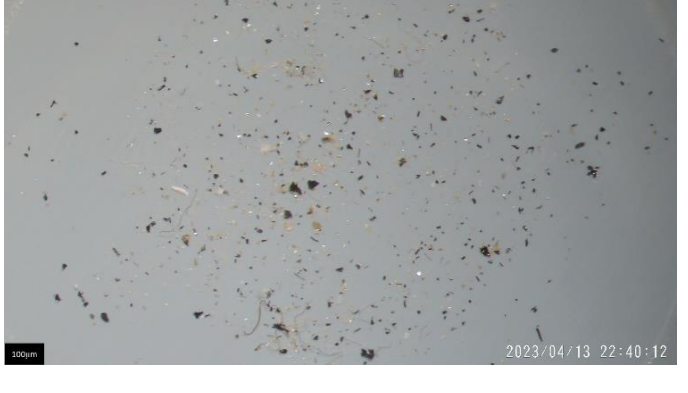   |    |
| <p>0-9cm<br/>NE 2</p> |   |   |
| <p>0-9cm<br/>NE 3</p> |  |  |

|                       |                                                                                     |                                                                                       |
|-----------------------|-------------------------------------------------------------------------------------|---------------------------------------------------------------------------------------|
| <p>0-9cm<br/>SW 1</p> | 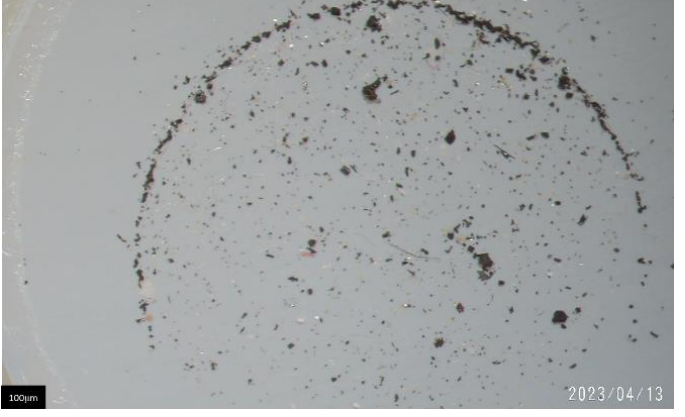   |    |
| <p>0-9cm<br/>SW 2</p> |   |   |
| <p>0-9cm<br/>SW 3</p> |  |  |

|                       |                                                                                     |                                                                                       |
|-----------------------|-------------------------------------------------------------------------------------|---------------------------------------------------------------------------------------|
| <p>0-9cm<br/>SE 1</p> |    |    |
| <p>0-9cm<br/>SE 2</p> |   |   |
| <p>0-9cm<br/>SE 3</p> |  |  |



|                        |                                                                                     |                                                                                       |
|------------------------|-------------------------------------------------------------------------------------|---------------------------------------------------------------------------------------|
| <p>9-18cm<br/>NW 1</p> | 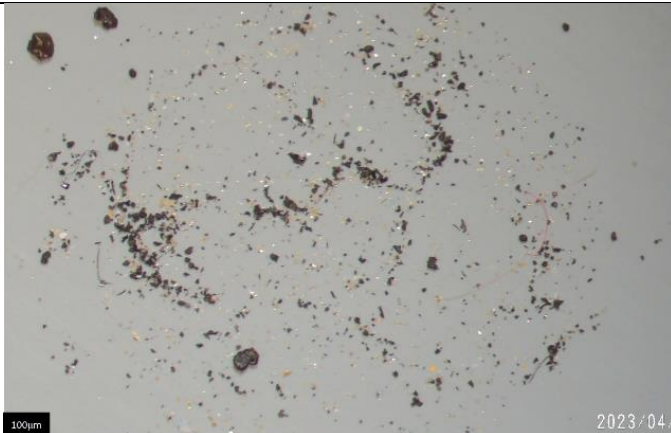   |    |
| <p>9-18cm<br/>NW 2</p> |   |   |
| <p>9-18cm<br/>NW 3</p> |  |  |

|                        |                                                                                     |                                                                                       |
|------------------------|-------------------------------------------------------------------------------------|---------------------------------------------------------------------------------------|
| <p>9-18cm<br/>NE 1</p> |    |    |
| <p>9-18cm<br/>NE 2</p> |   |   |
| <p>9-18cm<br/>NE 3</p> |  |  |

|                        |                                                                                     |                                                                                       |
|------------------------|-------------------------------------------------------------------------------------|---------------------------------------------------------------------------------------|
| <p>9-18cm<br/>SW 1</p> | 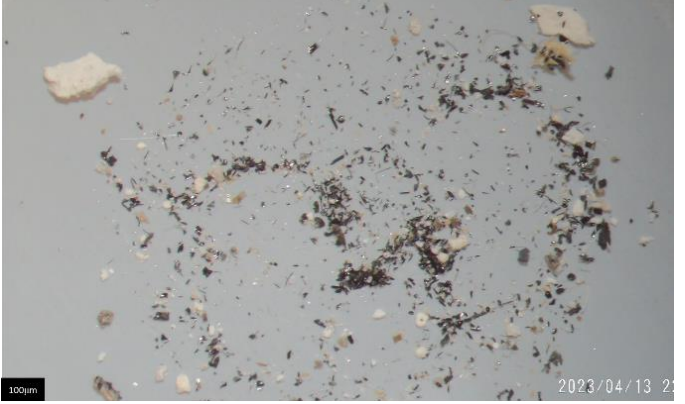   |    |
| <p>9-18cm<br/>SW 2</p> |   |   |
| <p>9-18cm<br/>SW 3</p> |  |  |

|                        |                                                                                     |                                                                                       |
|------------------------|-------------------------------------------------------------------------------------|---------------------------------------------------------------------------------------|
| <p>9-18cm<br/>SE 1</p> |    |    |
| <p>9-18cm<br/>SE 2</p> |   |   |
| <p>9-18cm<br/>SE 3</p> |  |  |

**Table S8.** Lodge Grass Dump Site Stereomicroscopy & Fluorescence Microscopy

|                  |                                                                                     |                                                                                       |
|------------------|-------------------------------------------------------------------------------------|---------------------------------------------------------------------------------------|
| 0-9cm<br>North 1 | 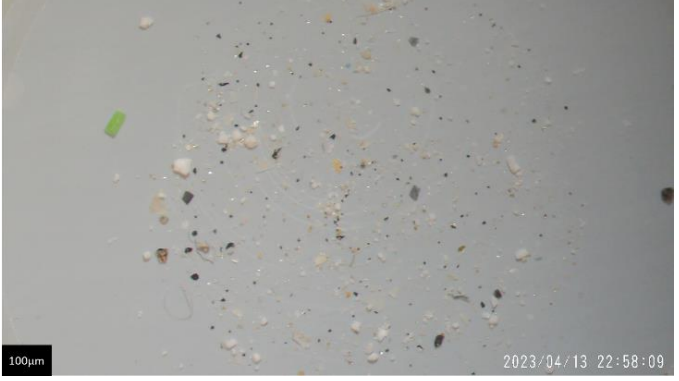   |    |
| 0-9cm<br>North 2 |   |   |
| 0-9cm<br>North 3 |  |  |

|                         |                                                                                     |                                                                                       |
|-------------------------|-------------------------------------------------------------------------------------|---------------------------------------------------------------------------------------|
| <p>0-9cm<br/>NW 1</p>   | 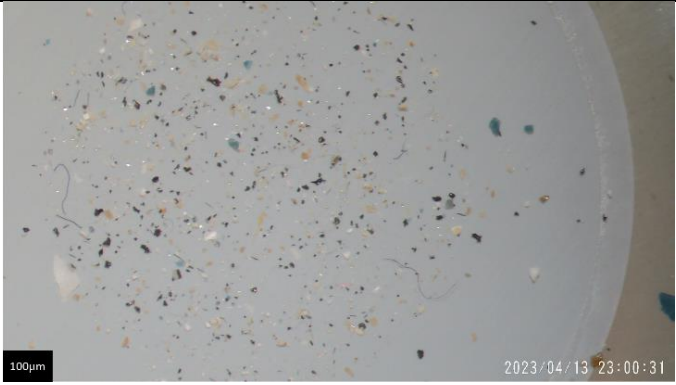   |    |
| <p>0-9cm<br/>NW 2</p>   |    |    |
| <p>0-9cm<br/>NW 3</p>   |  |  |
| <p>0-9cm<br/>West 1</p> |  |  |

|                         |                                                                                     |                                                                                       |
|-------------------------|-------------------------------------------------------------------------------------|---------------------------------------------------------------------------------------|
| <p>0-9cm<br/>West 2</p> |    |    |
| <p>0-9cm<br/>West 3</p> |   |    |
| <p>0-9cm<br/>SW 1</p>   |  |  |

|                           |                                                                                     |                                                                                       |
|---------------------------|-------------------------------------------------------------------------------------|---------------------------------------------------------------------------------------|
| <p>0-9cm<br/>SW 2</p>     | 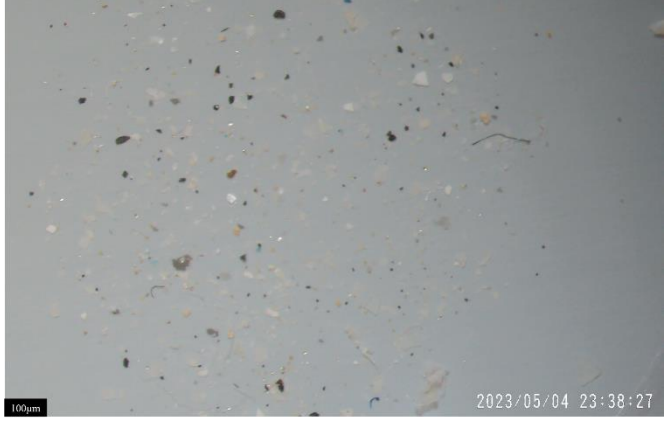   |    |
| <p>0-9cm<br/>SW 3</p>     |   |    |
| <p>9-18cm<br/>North 1</p> |  |  |



|                           |                                                                                                                      |                                                                                                       |
|---------------------------|----------------------------------------------------------------------------------------------------------------------|-------------------------------------------------------------------------------------------------------|
| <p>9-18cm<br/>North 2</p> |  <p>100µm 2023/04/13 23:01:53</p>   |  <p>10000 µm</p>   |
| <p>9-18cm<br/>North 3</p> |  <p>100µm 2023/04/13 23:02:09</p>   |  <p>10000 µm</p>   |
| <p>9-18cm<br/>NW 1</p>    |  <p>100µm 2023/04/13 23:17:33</p> |  <p>10000 µm</p> |
| <p>9-18cm<br/>NW 2</p>    |  <p>100µm 2023/04/13 23:17:47</p> |  <p>10000 µm</p> |

|                          |                                                                                     |                                                                                       |
|--------------------------|-------------------------------------------------------------------------------------|---------------------------------------------------------------------------------------|
| <p>9-18cm<br/>NW 3</p>   |    |    |
| <p>9-18cm<br/>West 1</p> |    |    |
| <p>9-18cm<br/>West 2</p> |  |  |
| <p>9-18cm<br/>West 3</p> |  |  |

|                        |                                                                                     |                                                                                       |
|------------------------|-------------------------------------------------------------------------------------|---------------------------------------------------------------------------------------|
| <p>9-18cm<br/>SW 1</p> | 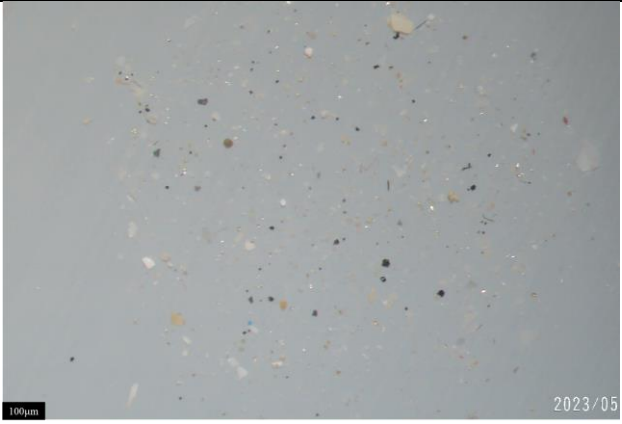   |    |
| <p>9-18cm<br/>SW 2</p> |   |   |
| <p>9-18cm<br/>SW 3</p> |  |  |

**Table S9.** Lab Control & Background Sites Stereomicroscopy & Fluorescence Microscopy

|               |                                                                                                                  |                                                                                                      |
|---------------|------------------------------------------------------------------------------------------------------------------|------------------------------------------------------------------------------------------------------|
| Lab<br>Ctrl 1 |  <p>100µm</p> <p>2023</p>       |  <p>10000 µm</p>   |
| Lab<br>Ctrl 2 |  <p>100µm</p> <p>2023/04/1</p> |  <p>10000 µm</p>  |
| Lab<br>Ctrl 3 |  <p>100µm</p> <p>2023/0</p>   |  <p>10000 µm</p> |

|                                                           |                                                                                     |                                                                                      |
|-----------------------------------------------------------|-------------------------------------------------------------------------------------|--------------------------------------------------------------------------------------|
| <p>Tuttle<br/>OK 0-<br/>9cm<br/>Backg<br/>round<br/>1</p> |    |    |
| <p>Tuttle<br/>OK 0-<br/>9cm<br/>Backg<br/>round<br/>2</p> |   |   |
| <p>Tuttle<br/>OK 0-<br/>9cm<br/>Backg<br/>round<br/>3</p> |  |  |

|                                                            |                                                                                     |                                                                                      |
|------------------------------------------------------------|-------------------------------------------------------------------------------------|--------------------------------------------------------------------------------------|
| <p>Tuttle<br/>OK 9-<br/>18cm<br/>Backg<br/>round<br/>1</p> |    |    |
| <p>Tuttle<br/>OK 9-<br/>18cm<br/>Backg<br/>round<br/>2</p> |   |   |
| <p>Tuttle<br/>OK 9-<br/>18cm<br/>Backg<br/>round<br/>3</p> |  |  |

|                                                     |                                                                                     |                                                                                      |
|-----------------------------------------------------|-------------------------------------------------------------------------------------|--------------------------------------------------------------------------------------|
| <p>CABS<br/>/LG 0-9cm<br/>Backg<br/>round<br/>1</p> |    |    |
| <p>CABS<br/>/LG 0-9cm<br/>Backg<br/>round<br/>2</p> |   |   |
| <p>CABS<br/>/LG 0-9cm<br/>Backg<br/>round<br/>3</p> |  |  |

|                                                           |                                                                                     |                                                                                      |
|-----------------------------------------------------------|-------------------------------------------------------------------------------------|--------------------------------------------------------------------------------------|
| <p>CABS<br/>/LG 9-<br/>18cm<br/>Backg<br/>round<br/>1</p> | 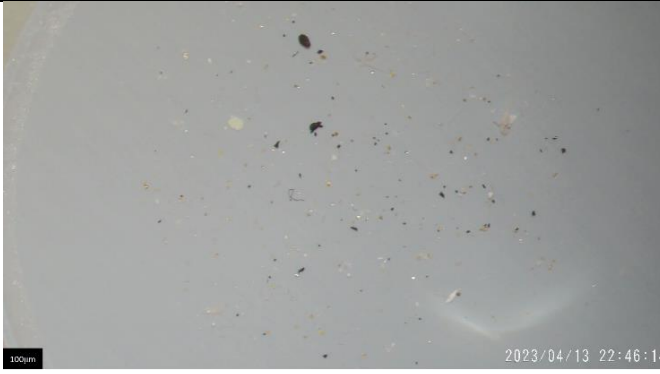   |    |
| <p>CABS<br/>/LG 9-<br/>18cm<br/>Backg<br/>round<br/>2</p> |   |   |
| <p>CABS<br/>/LG 9-<br/>18cm<br/>Backg<br/>round<br/>3</p> |  |  |



**Table S10.** ATR-FTIR Spectral Correlations from Tuttle Oklahoma Burn Site 0-9 cm Depth

| Site-Quadrant-Depth-Particle ID | Polymer Type                   | Correlation (%) |
|---------------------------------|--------------------------------|-----------------|
| Tuttle OK-West-Shallow-1        | HDPE (#1) 8h 100C              | 96.6            |
| Tuttle OK-West-Shallow-2        | LDPE (#1) 8h 100C              | 94.9            |
| Tuttle OK-West-Shallow-3        | Polyethylene- not burnt        | 90.9            |
| Tuttle OK-West-Shallow-4        | PS (#1) 1h 300C                | 89.7            |
| Tuttle OK-West-Shallow-5        | Rayon (CV#1) 200C 24h          | 53.0            |
| Tuttle OK-South-Shallow-1       | PP (#2) 8h 100C                | 96.6            |
| Tuttle OK-South-Shallow-2       | Polyethylene- 1hr 100C         | 96.2            |
| Tuttle OK-South-Shallow-3       | Polyethylene- not burnt        | 94.1            |
| Tuttle OK-South-Shallow-4       | Silicone Polymer #1            | 73.3            |
| Tuttle OK-South-Shallow-5       | Rayon (CV #1) 1h 200C          | 69.6            |
| Tuttle OK-East-Shallow-1        | LDPE (#1) 1h 100C              | 98.7            |
| Tuttle OK-East-Shallow-2        | PS (#1) 24h 100C               | 98.6            |
| Tuttle OK-East-Shallow-3        | LDPE (#2) 2h 100C              | 98.6            |
| Tuttle OK-East-Shallow-4        | HDPE (#1) 8h 100C              | 98.6            |
| Tuttle OK-East-Shallow-5        | Octyl Benzylphthalate          | 48.4            |
| Tuttle OK-North-Shallow-1       | LDPE (#2) 2h 100C              | 98.5            |
| Tuttle OK-North-Shallow-2       | LLDPE (#1) 1h 200C             | 95.6            |
| Tuttle OK-North-Shallow-3       | PE (#2) 1h 100C                | 95.1            |
| Tuttle OK-North-Shallow-4       | PP (#2) 1h 200C                | 89.7            |
| Tuttle OK-North-Shallow-5       | PP (#2) 1h 200C                | 89.6            |
| Tuttle OK-North-Shallow-6       | PP (#2) 24h 100C               | 87.7            |
| Tuttle OK-North-Shallow-7       | PP (#2) 1h 200C                | 87.6            |
| Tuttle OK-North-Shallow-8       | Olefin                         | 82.4            |
| Tuttle OK-North-Shallow-9       | PS (#1) 8h 100C                | 79.5            |
| Tuttle OK-North-Shallow-10      | Rayon (CV #1) 8h 200C          | 77.4            |
| Tuttle OK-North-Shallow-11      | ABS/PVC Blend                  | 76.7            |
| Tuttle OK-North-Shallow-12      | Poly(Ethylene:Propylene:Diene) | 70.9            |

**Table S11.** ATR-FTIR Spectral Matches from Tuttle Oklahoma Burn Site 9-18 cm Depth

| <b>Site-Quadrant-Depth-Particle ID</b> | <b>Polymer Type</b>       | <b>Match (%)</b> |
|----------------------------------------|---------------------------|------------------|
| Tuttle OK-West-Deep-1                  | LDPE (#2) 2h 100C         | 99.6             |
| Tuttle OK- West -Deep-2                | LDPE (#2) 2h 100C         | 99.0             |
| Tuttle OK- West -Deep-3                | LDPE (#1) 8h 100C         | 98.7             |
| Tuttle OK- West -Deep-4                | LDPE (#2) 2h 100C         | 98.7             |
| Tuttle OK- West -Deep-5                | LDPE (#1) 8h 100C         | 98.7             |
| Tuttle OK- West -Deep-6                | LDPE (#1) 1h 100C         | 98.4             |
| Tuttle OK- West -Deep-7                | PET (#2) 1h 100C          | 93.3             |
| Tuttle OK-South-Deep-1                 | LDPE (#1) 24h 100C        | 96.5             |
| Tuttle OK- South -Deep-2               | LDPE (#1) 8h 100C         | 94.8             |
| Tuttle OK- South -Deep-3               | HDPE (#1) 24h 100C        | 92.9             |
| Tuttle OK- South -Deep-4               | Polyester- 2hr 100C       | 92.5             |
| Tuttle OK- South -Deep-5               | PE (#1) 1h 200C           | 89.6             |
| Tuttle OK- South -Deep-6               | PE (#1) 1h 200C           | 88.4             |
| Tuttle OK- South -Deep-7               | Polyethylene- 1hr 100C    | 87.5             |
| Tuttle OK- South -Deep-8               | Ethoxylated Stearyl Amine | 84.9             |
| Tuttle OK- South -Deep-9               | PE (#1) 1h 200C           | 84.1             |
| Tuttle OK- South -Deep-10              | PE (#1) 1h 200C           | 83.8             |
| Tuttle OK- South -Deep-11              | LDPE (#1) 1h 200C         | 82.1             |
| Tuttle OK- South -Deep-12              | PE (#1) 1h 200C           | 82.1             |
| Tuttle OK- South -Deep-13              | LDPE (#2) 8h 100C         | 81.5             |
| Tuttle OK- South -Deep-14              | LLDPE (#1) 1h 200C        | 81.4             |
| Tuttle OK- South -Deep-15              | Aged Polyethylene NPs     | 79.3             |
| Tuttle OK-East-Deep-1                  | LLDPE (#1) 1h 200C        | 97.9             |
| Tuttle OK-East-Deep-2                  | PP (#2) 1h 200C           | 97.3             |
| Tuttle OK-East-Deep-3                  | PP (#2) 8h 100C           | 95.7             |
| Tuttle OK-East-Deep-4                  | PE (#3) 1h 100C           | 94.8             |
| Tuttle OK-East-Deep-5                  | PE (#3) 1h 100C           | 90.8             |
| Tuttle OK-North-Deep-1                 | LDPE (#2) 2h 100C         | 97.6             |
| Tuttle OK-North-Deep-2                 | PE (#2) 1h 100C           | 93.3             |
| Tuttle OK-North-Deep-3                 | Rayon (CV#1) 8h 200C      | 72.8             |
| Tuttle OK-North-Deep-4                 | Rayon (CV #1) 8h 200C     | 72.1             |
| Tuttle OK-North-Deep-5                 | Rayon (CV#1) 24h 200C     | 70.6             |

**Table S12. ATR-FTIR Spectral Matches from Crow Agency Burn Site 0-9 cm Depth**

| Site-Quadrant-Depth-Particle ID | Polymer Type                     | Match (%) |
|---------------------------------|----------------------------------|-----------|
| CABS-NW-Shallow-1               | LLDPE (#1) 1h 200C               | 99.3      |
| CABS-NW-Shallow-2               | HDPE (#1) 8h 100C                | 99.19     |
| CABS-NW-Shallow-3               | PS (#2) 1h 300C                  | 98.91     |
| CABS-NW-Shallow-4               | LLDPE (#1) 1h 200C               | 98.79     |
| CABS-NW-Shallow-5               | HDPE (#2) 2h 100C                | 98.66     |
| CABS-NW-Shallow-6               | HDPE (#1) 2h 100C                | 98.57     |
| CABS-NW-Shallow-7               | PE (#1) 8h 100C                  | 98.47     |
| CABS-NW-Shallow-8               | LDPE (#2) 2h 100C                | 98.05     |
| CABS-NW-Shallow-9               | PE (#1) 1h 100C                  | 97.83     |
| CABS-NW-Shallow-10              | LDPE (#2) 2h 100C                | 97.42     |
| CABS-NW-Shallow-11              | PET (#2) 1h 100C                 | 96.95     |
| CABS-NW-Shallow-12              | Acrylic Polymer #1               | 88.51     |
| CABS-NW-Shallow-13              | PE (#2) 1h 100C                  | 84.53     |
| CABS-NW-Shallow-14              | PharMed (PP-based thermoplastic) | 82.56     |
| CABS-NW-Shallow-15              | Poly(Vinyl Chloride)             | 82.18     |
| CABS-NE-Shallow-1               | Polyethylene - 1h 100C           | 98.39     |
| CABS-NE-Shallow-2               | HDPE (#1) 1h 100C                | 97.89     |
| CABS-NE-Shallow-3               | PP (#2) 8h 100C                  | 97.55     |
| CABS-NE-Shallow-4               | LDPE (#1) 8h 100C                | 96.74     |
| CABS-NE-Shallow-5               | PE (#1) 8h 100C                  | 96.57     |
| CABS-NE-Shallow-6               | Rayon (CV#1) 1h 100C             | 96.57     |
| CABS-NE-Shallow-7               | LLDPE (#1) 1h 200C               | 95.62     |
| CABS-NE-Shallow-8               | PP (#2) 1h 200C                  | 94.06     |
| CABS-NE-Shallow-9               | LDPE (#1) 2h 300C                | 93.83     |
| CABS-NE-Shallow-10              | Polyethylene - not burnt         | 93.38     |
| CABS-NE-Shallow-11              | UV Aged Polystyrene              | 93.23     |
| CABS-NE-Shallow-12              | PP (#2) 1h 200C                  | 91.88     |
| CABS-NE-Shallow-13              | Rayon (CV #1) 8h 100C            | 75.31     |
| CABS-NE-Shallow-14              | Silicone Polymer #1              | 75.26     |
| CABS-NE-Shallow-15              | Rayon (CV#1) 1h 200C             | 66.91     |
| CABS-SW-Shallow-1               | LLDPE (#1) 1h 200C               | 99.59     |
| CABS-SW-Shallow-2               | LLDPE (#1) 1h 200C               | 99.53     |
| CABS-SW-Shallow-3               | HDPE (#2) 8h 100C                | 99.33     |
| CABS-SW-Shallow-4               | HDPE (#1) 1h 100C                | 99.16     |
| CABS-SW-Shallow-5               | HDPE (#1) 1h 100C                | 98.87     |
| CABS-SW-Shallow-6               | UV Aged Polystyrene              | 98.8      |
| CABS-SW-Shallow-7               | LDPE (#2) 2h 100C                | 98.8      |
| CABS-SW-Shallow-8               | HDPE (#1) 8h 100C                | 98.01     |
| CABS-SW-Shallow-9               | HDPE (#2) 8h 100C                | 96.69     |
| CABS-SW-Shallow-10              | LDPE (#1) 8h 100C                | 96.51     |
| CABS-SW-Shallow-11              | Rayon (CV #1) 1h 100C            | 95.39     |
| CABS-SW-Shallow-12              | Polyethylene -1h 100C            | 94.9      |
| CABS-SW-Shallow-13              | LLDPE (#1) 1h 200C               | 91.3      |
| CABS-SW-Shallow-14              | LDPE (#2) 24h 300C               | 85.04     |
| CABS-SW-Shallow-15              | PVC (#2) 1h 200C                 | 61.56     |
| CABS-SE-Shallow                 | n/a due to excessive ash         | n/a       |

**Table S13. ATR-FTIR Spectral Matches from Crow Agency Burn Site 9-18 cm Depth**

| Site-Quadrant-Depth-Particle ID | Polymer Type                                  | Match (%) |
|---------------------------------|-----------------------------------------------|-----------|
| CABS-NW-Deep-1                  | PP (#2) 8h 100C                               | 98.54     |
| CABS-NW-Deep-2                  | PP (#2) 8h 100C                               | 98.51     |
| CABS-NW-Deep-3                  | LDPE (#2) 24h 300C                            | 98.35     |
| CABS-NW-Deep-4                  | PP (#2) 8h 100C                               | 98.32     |
| CABS-NW-Deep-5                  | HDPE (#1) 8h 100C                             | 98.29     |
| CABS-NW-Deep-6                  | HDPE (#1) 1h 100C                             | 97.8      |
| CABS-NW-Deep-7                  | LDPE (#1) 24h 100C                            | 95.4      |
| CABS-NW-Deep-8                  | LDPE (#1) 2h 100C                             | 94.94     |
| CABS-NW-Deep-9                  | PP (#2) 8h 100C                               | 89.23     |
| CABS-NW-Deep-10                 | Poly(Vinyl Chloride)                          | 88.28     |
| CABS-NW-Deep-11                 | EVA Foam Concentrate, 20% Azodicarbonamide #1 | 84.07     |
| CABS-NW-Deep-12                 | PharMed (PP based thermoplastic)              | 81.96     |
| CABS-NW-Deep-13                 | Olefin                                        | 80.45     |
| CABS-NW-Deep-14                 | Poly(Ethylene:Propylene:Diene)                | 68.73     |
| CABS-NW-Deep-15                 | Poly(Ethylene:Propylene:Diene)                | 64.1      |
| CABS-NE-Deep-1                  | LDPE (#2) 2h 100C                             | 99.4      |
| CABS-NE-Deep-2                  | LDPE (#2) 2h 100C                             | 99.35     |
| CABS-NE-Deep-3                  | Pristine Polyethylene NPs                     | 99.34     |
| CABS-NE-Deep-4                  | PS (#2) 1h 100C                               | 99.3      |
| CABS-NE-Deep-5                  | LDPE (#2) 2h 100C                             | 98.38     |
| CABS-NE-Deep-6                  | PP (#2) 24h 100C                              | 98.13     |
| CABS-NE-Deep-7                  | HDPE (#1) 8h 100C                             | 97.38     |
| CABS-NE-Deep-8                  | PE (#3) 1h 100C                               | 97.13     |
| CABS-NE-Deep-9                  | UV Aged Polystyrene                           | 96.65     |
| CABS-NE-Deep-10                 | LDPE (#1) 8h 100C                             | 95.87     |
| CABS-NE-Deep-11                 | LLDPE (#1) 1h 200C                            | 94.28     |
| CABS-NE-Deep-12                 | UV Aged Polyethylene NPs                      | 91.34     |
| CABS-NE-Deep-13                 | Pristine Polyethylene NPs                     | 89.39     |
| CABS-NE-Deep-14                 | PP (#2) 8h 100C                               | 85.16     |
| CABS-SW-Deep-1                  | LLDPE (#1) 1h 200C                            | 99.42     |
| CABS-SW-Deep-2                  | LLDPE (#1) 1h 200C                            | 99.31     |
| CABS-SW-Deep-3                  | LLDPE (#1) 1h 200C                            | 99.14     |
| CABS-SW-Deep-4                  | LLDPE (#1) 8h 100C                            | 99.05     |
| CABS-SW-Deep-5                  | LDPE (#2) 2h 100C                             | 99.03     |
| CABS-SW-Deep-6                  | LDPE (#2) 2h 100C                             | 98.95     |
| CABS-SW-Deep-7                  | PE (#1) 8h 100C                               | 98.78     |
| CABS-SW-Deep-8                  | HDPE (#1) 2h 100C                             | 98.78     |
| CABS-SW-Deep-9                  | PS (#2) 1h 300C                               | 98.57     |
| CABS-SW-Deep-10                 | LLDPE (#1) 1h 200C                            | 98.5      |
| CABS-SW-Deep-11                 | HDPE (#1) 1h 100C                             | 98        |
| CABS-SW-Deep-12                 | HDPE (#1) 1h 100C                             | 97.94     |
| CABS-SW-Deep-13                 | LLDPE (#1) 1h 200C                            | 95.64     |
| CABS-SW-Deep-14                 | Alkyd Resin                                   | 85.83     |
| CABS-SW-Deep-15                 | Acrylic Polymer #1                            | 83.74     |
| CABS-SE-Deep-1                  | PS (#3) 24h 100C                              | 99.82     |
| CABS-SE-Deep-2                  | LLDPE (#1) 1h 200C                            | 98.95     |
| CABS-SE-Deep-3                  | LLDPE (#1) 1h 200C                            | 98.93     |
| CABS-SE-Deep-4                  | PE (#2) 1h 100C                               | 98.24     |
| CABS-SE-Deep-5                  | LLDPE (#1) 1h 200C                            | 97.79     |
| CABS-SE-Deep-6                  | Polyethylene - not burnt                      | 96.99     |
| CABS-SE-Deep-7                  | Pristine Polyethylene NPs                     | 96.87     |
| CABS-SE-Deep-8                  | LDPE (#1) 24h 100C                            | 96.82     |
| CABS-SE-Deep-9                  | LDPE (#1) 8h 100C                             | 96.4      |
| CABS-SE-Deep-10                 | Pristine Polyethylene NPs                     | 94.1      |
| CABS-SE-Deep-11                 | LLDPE (#1) 1h 200C                            | 91.9      |
| CABS-SE-Deep-12                 | PP (#2) 1h 200C                               | 89.56     |
| CABS-SE-Deep-13                 | Ethoxylated Stearyl Amine                     | 88.86     |
| CABS-SE-Deep-14                 | Aged Polyethylene NPs                         | 69.37     |
| CABS-SE-Deep-15                 | PP (#2) 8h 100C                               | 63.31     |

**Table S14. ATR-FTIR Spectral Matches from Lodge Grass Dump Site 0-9 cm Depth**

| Site-Quadrant-Depth-Particle ID | Polymer Type                    | Match (%) |
|---------------------------------|---------------------------------|-----------|
| LG-N-Shallow-1                  | PS (#3) 1h 100C                 | 99.87     |
| LG-N-Shallow-2                  | LLDPE (#1) 1h 200C              | 99.29     |
| LG-N-Shallow-3                  | LLDPE (#1) 1h 200C              | 99.21     |
| LG-N-Shallow-4                  | LLDPE (#1) 1h 200C              | 98.78     |
| LG-N-Shallow-5                  | LLDPE (#1) 1h 200C              | 98.68     |
| LG-N-Shallow-6                  | HDPE (#1) 8h 100C               | 97.75     |
| LG-N-Shallow-7                  | LDPE (#2) 2h 100C               | 97.60     |
| LG-N-Shallow-8                  | HDPE (#1) 8h 100C               | 97.21     |
| LG-N-Shallow-9                  | LDPE (#2) 8h 100C               | 96.36     |
| LG-N-Shallow-10                 | LDPE (#2) 2h 100C               | 95.93     |
| LG-N-Shallow-11                 | Polyethylene/Millad Blend       | 91.82     |
| LG-N-Shallow-12                 | LLDPE (#1) 1h 200C              | 87.49     |
| LG-N-Shallow-13                 | ABS/PVC Blend                   | 74.52     |
| LG-N-Shallow-14                 | Aged Polyethylene NPs           | 74.05     |
| LG-N-Shallow-15                 | Rayon (CV #1) 200C 24h          | 66.20     |
| LG-NW-Shallow-1                 | HDPE (#1) 8h 100C               | 99.44     |
| LG-NW-Shallow-2                 | HDPE (#1) 8h 100C               | 98.76     |
| LG-NW-Shallow-3                 | PE (#3) 1h 100C                 | 98.71     |
| LG-NW-Shallow-4                 | PE (#3) 1h 100C                 | 98.69     |
| LG-NW-Shallow-5                 | LLDPE (#1) 1h 200C              | 98.41     |
| LG-NW-Shallow-6                 | HDPE (#1) 8h 100C               | 98.33     |
| LG-NW-Shallow-7                 | LLDPE (#1) 1h 200C              | 98.33     |
| LG-NW-Shallow-8                 | HDPE (#1) 8h 100C               | 97.79     |
| LG-NW-Shallow-9                 | LDPE (#2) 24h 300C              | 97.54     |
| LG-NW-Shallow-10                | HDPE (#1) 8h 100C               | 96.83     |
| LG-NW-Shallow-11                | HDPE (#1) 8h 100C               | 96.83     |
| LG-NW-Shallow-12                | LDPE (#2) 8h 100C               | 96.02     |
| LG-NW-Shallow-13                | LLDPE (#1) 1h 200C              | 94.66     |
| LG-NW-Shallow-14                | LLDPE (#1) 1h 200C              | 94.36     |
| LG-NW-Shallow-15                | LLDPE (#1) 1h 200C              | 58.28     |
| LG-W-Shallow-1                  | PE (#3) 1h 100C                 | 99.23     |
| LG-W-Shallow-2                  | PE (#3) 1h 100C                 | 99.22     |
| LG-W-Shallow-3                  | LDPE (#2) 2h 100C               | 99.22     |
| LG-W-Shallow-4                  | PE (#3) 1h 100C                 | 99.11     |
| LG-W-Shallow-5                  | Pristine Polyethylene NPs       | 99.05     |
| LG-W-Shallow-6                  | HDPE (#1) 1h 100C               | 98.34     |
| LG-W-Shallow-7                  | HDPE (#1) 8h 100C               | 98.04     |
| LG-W-Shallow-8                  | HDPE (#2) 1h 100C               | 97.97     |
| LG-W-Shallow-9                  | PET (#2) 1h 100C                | 97.83     |
| LG-W-Shallow-10                 | PE (#2) 1h 100C                 | 95.83     |
| LG-W-Shallow-11                 | PET (#2) 1h 100C                | 95.60     |
| LG-W-Shallow-12                 | PET (#1) 1h 200C                | 86.64     |
| LG-W-Shallow-13                 | Polyethylene white layer (TiO2) | 82.68     |
| LG-W-Shallow-14                 | PE (#1) 1h 200C                 | 80.11     |
| LG-W-Shallow-15                 | Olefin                          | 55.16     |
| LG-SW-Shallow-1                 | PS (#3) 24h 100C                | 99.77     |
| LG-SW-Shallow-2                 | LDPE (#2) 2h 100C               | 99.23     |
| LG-SW-Shallow-3                 | HDPE (#1) 8h 100C               | 98.99     |
| LG-SW-Shallow-4                 | PE (#1) 8h 100C                 | 98.68     |
| LG-SW-Shallow-5                 | PE (#3) 1h 100C                 | 98.60     |
| LG-SW-Shallow-6                 | LDPE (#2) 2h 100C               | 98.60     |
| LG-SW-Shallow-7                 | LDPE (#1) 1h 100C               | 98.57     |
| LG-SW-Shallow-8                 | LDPE (#2) 2h 100C               | 98.49     |
| LG-SW-Shallow-9                 | LDPE (#2) 2h 100C               | 98.42     |
| LG-SW-Shallow-10                | PE (#1) 8h 100C                 | 98.18     |
| LG-SW-Shallow-11                | LDPE (#2) 2h 100C               | 97.99     |
| LG-SW-Shallow-12                | LDPE (#2) 2h 100C               | 94.99     |
| LG-SW-Shallow-13                | HDPE (#1) 8h 100C               | 88.80     |
| LG-SW-Shallow-14                | Aged Polyethylene NPs           | 87.25     |
| LG-SW-Shallow-15                | Rayon (CV #1) 200C 24h          | 68.54     |

**Table S15.** ATR-FTIR Spectral Matches from Lodge Grass Dump Site 9-18 cm Depth

| Site-Quadrant-Depth-Particle ID | Polymer Type              | Match (%) |
|---------------------------------|---------------------------|-----------|
| LG-N-Deep-1                     | HDPE (#1) 8h 100C         | 99.11     |
| LG-N-Deep-2                     | PE (#3) 1h 100C           | 99.04     |
| LG-N-Deep-3                     | HDPE (#1) 8h 100C         | 98.91     |
| LG-N-Deep-4                     | PE (#3) 1h 100C           | 98.82     |
| LG-N-Deep-5                     | PE (#3) 1h 100C           | 98.74     |
| LG-N-Deep-6                     | PE (#3) 1h 100C           | 98.72     |
| LG-N-Deep-7                     | LDPE (#2) 2h 100C         | 98.52     |
| LG-N-Deep-8                     | PE (#3) 1h 100C           | 98.46     |
| LG-N-Deep-9                     | PE (#2) 1h 100C           | 98.46     |
| LG-N-Deep-10                    | PE (#3) 1h 100C           | 98.38     |
| LG-N-Deep-11                    | PE (#3) 1h 100C           | 98.33     |
| LG-N-Deep-12                    | LLDPE (#1) 1h 200C        | 98.08     |
| LG-N-Deep-13                    | LDPE (#1) 24h 100C        | 96.94     |
| LG-N-Deep-14                    | LDPE (#2) 2h 100C         | 94.11     |
| LG-N-Deep-15                    | PE (#2) 1h 100C           | 92.58     |
| LG-NW-Deep-1                    | LDPE (#2) 2h 100C         | 99.23     |
| LG-NW-Deep-2                    | HDPE (#1) 8h 100C         | 98.71     |
| LG-NW-Deep-3                    | HDPE (#1) 8h 100C         | 98.11     |
| LG-NW-Deep-4                    | LLDPE (#1) 8h 100C        | 97.63     |
| LG-NW-Deep-5                    | LDPE (#1) 1h 100C         | 96.53     |
| LG-NW-Deep-6                    | PE (#3) 1h 100C           | 93.62     |
| LG-NW-Deep-7                    | Pristine Polyethylene NPs | 93.33     |
| LG-NW-Deep-8                    | PE (#1) 1h 100C           | 89.99     |
| LG-NW-Deep-9                    | Silicone Polymer #1       | 79.37     |
| LG-NW-Deep-10                   | Silicone Polymer #1       | 76.11     |
| LG-NW-Deep-11                   | LDPE (#2) 8h 100C         | 75.75     |
| LG-NW-Deep-12                   | Olefin                    | 53.44     |
| LG-NW-Deep-13                   | PE (#2) 8h 100C           | 51.27     |
| LG-NW-Deep-14                   | LLDPE (#1) 1h 200C        | 43.29     |
| LG-NW-Deep-15                   | Alumina Silicate #1       | 37.66     |
| LG-W-Deep-1                     | Pristine Polyethylene NPs | 99.40     |
| LG-W-Deep-2                     | PE (#3) 1h 100C           | 98.86     |
| LG-W-Deep-3                     | Pristine Polyethylene NPs | 98.78     |
| LG-W-Deep-4                     | LDPE (#2) 2h 100C         | 98.70     |
| LG-W-Deep-5                     | PE (#1) 8h 100C           | 98.26     |
| LG-W-Deep-6                     | LLDPE (#1) 1h 200C        | 97.93     |
| LG-W-Deep-7                     | Rayon (CV#1) 1h 100C      | 97.66     |
| LG-W-Deep-8                     | LLDPE (#1) 1h 200C        | 97.10     |
| LG-W-Deep-9                     | HDPE (#2) 8h 100C         | 96.18     |
| LG-W-Deep-10                    | PS (#2) 24h 100C          | 95.82     |
| LG-W-Deep-11                    | HDPE (#2) 2h 200C         | 93.78     |
| LG-W-Deep-12                    | Rayon (CV#1) 8h 100C      | 91.15     |
| LG-W-Deep-13                    | LLDPE (#1) 8h 100C        | 88.18     |
| LG-W-Deep-14                    | PS (#1) 1h 300C           | 75.58     |
| LG-W-Deep-15                    | Polyester (TS) #7         | 74.47     |
| LG-SW-Deep-1                    | PS (#3) 24h 100C          | 99.63     |
| LG-SW-Deep-2                    | LDPE (#2) 2h 100C         | 99.08     |
| LG-SW-Deep-3                    | HDPE (#1) 1h 100C         | 99.06     |
| LG-SW-Deep-4                    | Pristine Polyethylene NPs | 98.55     |
| LG-SW-Deep-5                    | LLDPE (#1) 1h 200C        | 98.45     |
| LG-SW-Deep-6                    | HDPE (#1) 1h 100C         | 98.27     |
| LG-SW-Deep-7                    | HDPE (#1) 1h 100C         | 97.91     |
| LG-SW-Deep-8                    | HDPE (#1) 1h 100C         | 97.61     |
| LG-SW-Deep-9                    | Pristine Polyethylene NPs | 97.50     |
| LG-SW-Deep-10                   | LDPE (#1) 8h 100C         | 97.37     |
| LG-SW-Deep-11                   | LDPE (#2) 2h 100C         | 96.74     |

|               |                         |       |
|---------------|-------------------------|-------|
| LG-SW-Deep-12 | HDPE (#1) 8h 100C       | 95.90 |
| LG-SW-Deep-13 | HDPE (#1) 1h 100C       | 93.45 |
| LG-SW-Deep-14 | Silicone Polymer #1     | 92.33 |
| LG-SW-Deep-15 | Polyethylene- not burnt | 73.90 |

**Table S16.** ATR-FTIR Spectral Matches from Lab Control and Background Sites

| Sample                                           | Particle ID                    | Match                                                       | Match (%)    |
|--------------------------------------------------|--------------------------------|-------------------------------------------------------------|--------------|
| Lab Control                                      | Lab-1                          | Titanium Oxide (98%), Aluminum Oxide (2%)                   | 68.1         |
|                                                  | Lab-2                          | Bis(2-Hydroxy-5-T-Octyl-3-(Benzotriazole-2-YL) Phenyl Amine | 34.0         |
|                                                  | Lab-3                          | <b>LDPE (#1) 1h 100C</b>                                    | <b>98.9</b>  |
|                                                  | Lab-4                          | <b>PP (#2) 8h 100C</b>                                      | <b>97.0</b>  |
|                                                  | Lab-5                          | Antimony Trioxide                                           | 52.8         |
| Crow Agency & Lodge Grass Background 0-9cm Core  | CABS&LG- Background-Shallow-1  | <b>LLDPE (#1) 1h 200C</b>                                   | <b>97.76</b> |
|                                                  | CABS&LG- Background-Shallow-2  | <b>Pristine Polyethylene NPs</b>                            | <b>82.7</b>  |
|                                                  | CABS&LG- Background-Shallow-3  | <b>LDPE (#2) 24h 300C</b>                                   | <b>70.57</b> |
|                                                  | CABS&LG- Background-Shallow-4  | <b>PP (#2) 24h 100C</b>                                     | <b>94.09</b> |
|                                                  | CABS&LG- Background-Shallow-5  | <b>Polyethylene - not burnt</b>                             | <b>97.47</b> |
| Crow Agency & Lodge Grass Background 9-18cm Core | CABS&LG- Background-Deep-1     | <b>Rayon</b>                                                | <b>70.02</b> |
|                                                  | CABS&LG- Background-Deep-2     | <b>LLDPE (#1) 24h 100C</b>                                  | <b>96.01</b> |
|                                                  | CABS&LG- Background-Deep-3     | <b>LDPE (#2) 1h 100C</b>                                    | <b>99.4</b>  |
|                                                  | CABS&LG- Background-Deep-4     | <b>Rayon (CV #1) 24h 200C</b>                               | <b>77.42</b> |
|                                                  | CABS&LG- Background-Deep-5     | <b>LLDPE (#1) 1h 200C</b>                                   | <b>83.54</b> |
| Tuttle Oklahoma Background 0-9cm Core            | Tuttle OK-Background-Shallow-1 | <b>HDPE (#1) 24h 100C</b>                                   | <b>72.92</b> |
|                                                  | Tuttle OK-Background-Shallow-2 | <b>Pristine Polyethylene NPs</b>                            | <b>83.13</b> |
|                                                  | Tuttle OK-Background-Shallow-3 | Ground Calcium Carbonate #4                                 | 26.57        |
|                                                  | Tuttle OK-Background-Shallow-4 | Poly(MethylPhenylSiloxane)                                  | 47.23        |
|                                                  | Tuttle OK-Background-Shallow-5 | Cadmium, Zinc, Barium Sulfide Blend                         | 47.35        |
| Tuttle Oklahoma Background 9-18cm Core           | Tuttle OK-Deep-Shallow-1       | <b>LDPE (#1) 24h 100C</b>                                   | <b>96.93</b> |
|                                                  | Tuttle OK-Deep-Shallow-2       | Titanium Oxide (98%), Aluminum Oxide (2%)                   | 44.76        |
|                                                  | Tuttle OK-Deep-Shallow-3       | Antimony Trioxide                                           | 47.77        |
|                                                  | Tuttle OK-Deep-Shallow-4       | Alkyd Resin                                                 | 40.17        |
|                                                  | Tuttle OK-Deep-Shallow-5       | <b>PP (#2) 8h 100C</b>                                      | <b>84.91</b> |

\*bold indicates a confirmed MP

**Table S17: Tuttle Oklahoma Burn Site ATR-FTIR Particle and Spectra Images**

|                                           |                                                                                     |                                                                                      |
|-------------------------------------------|-------------------------------------------------------------------------------------|--------------------------------------------------------------------------------------|
| <p>Tuttle OK-<br/>West-<br/>Shallow-1</p> | 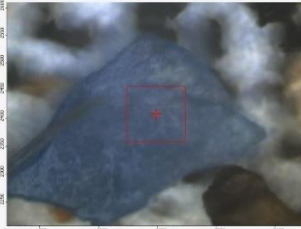   |    |
| <p>Tuttle OK-<br/>West-<br/>Shallow-2</p> |    |    |
| <p>Tuttle OK-<br/>West-<br/>Shallow-3</p> |   |   |
| <p>Tuttle OK-<br/>West-<br/>Shallow-4</p> |  |  |



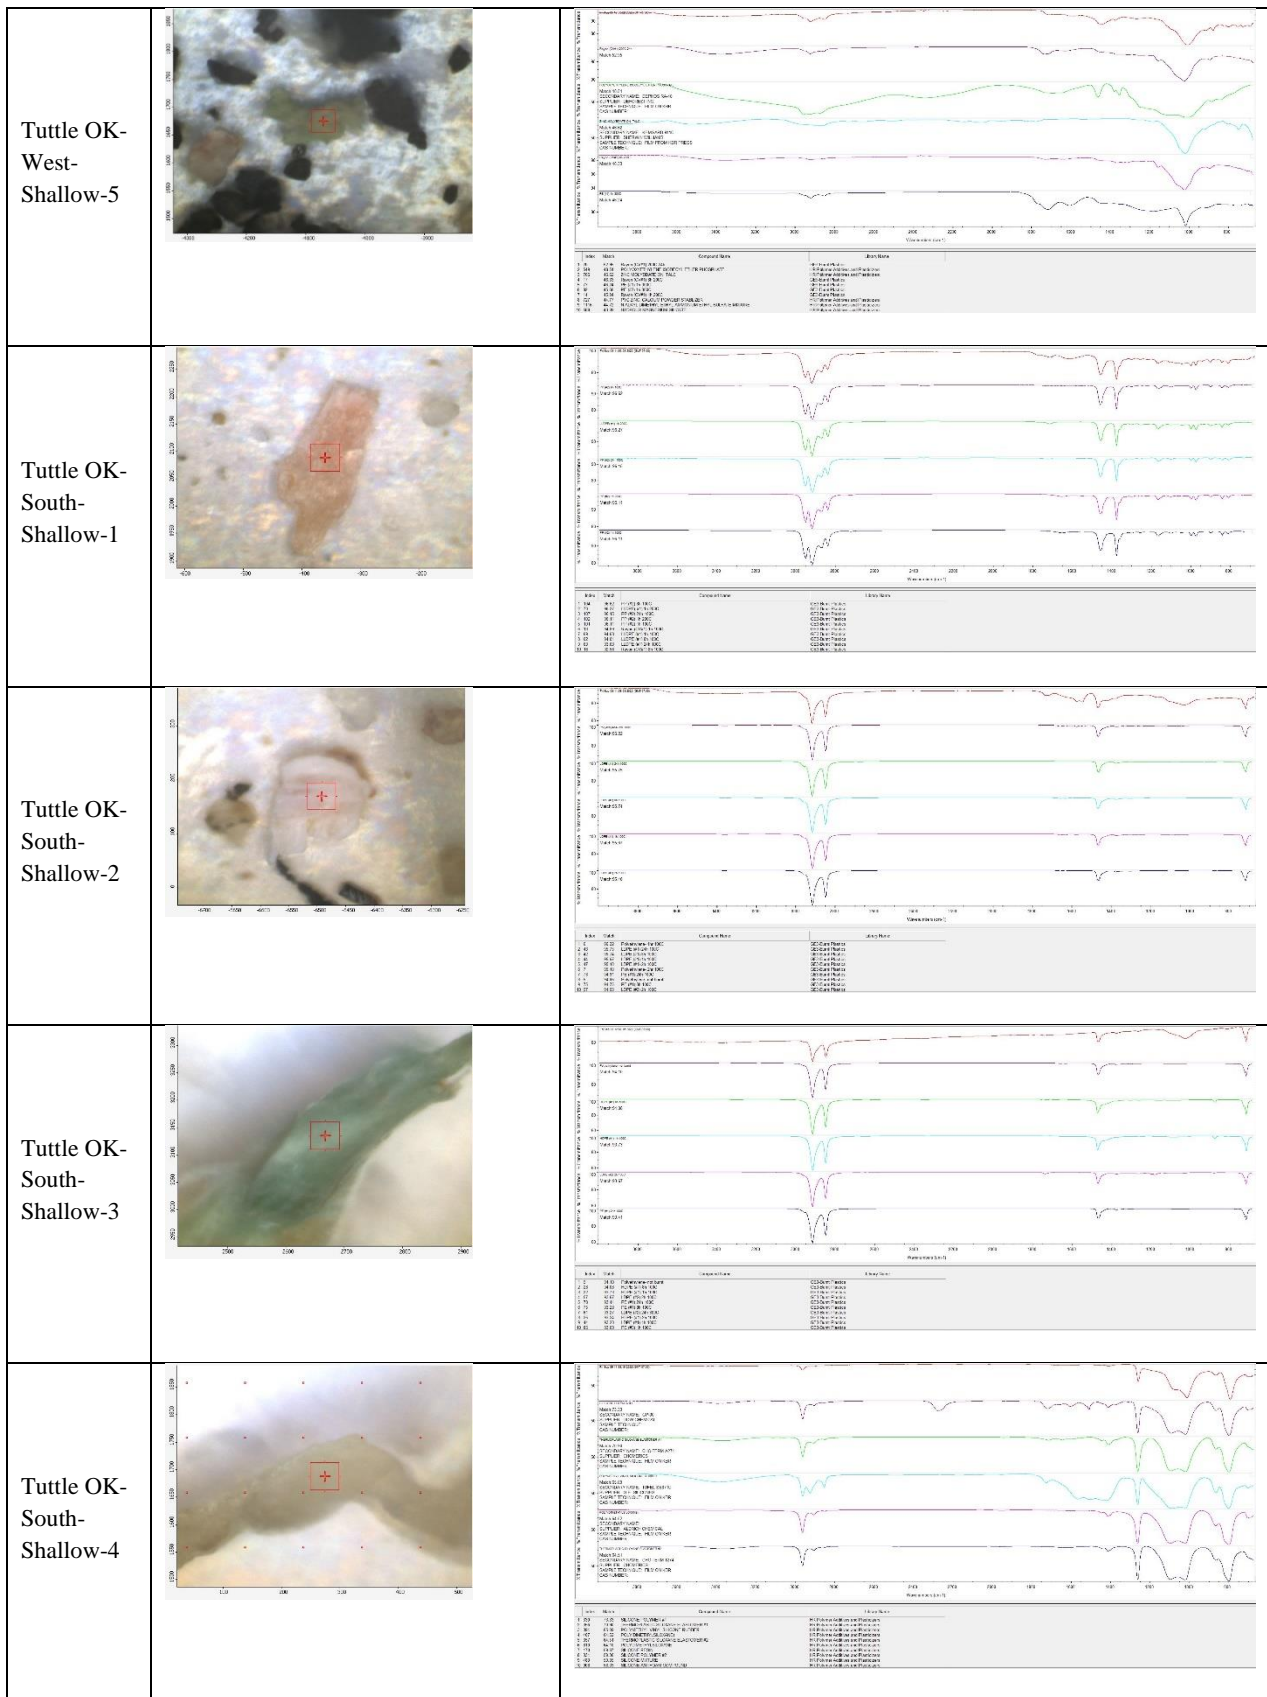



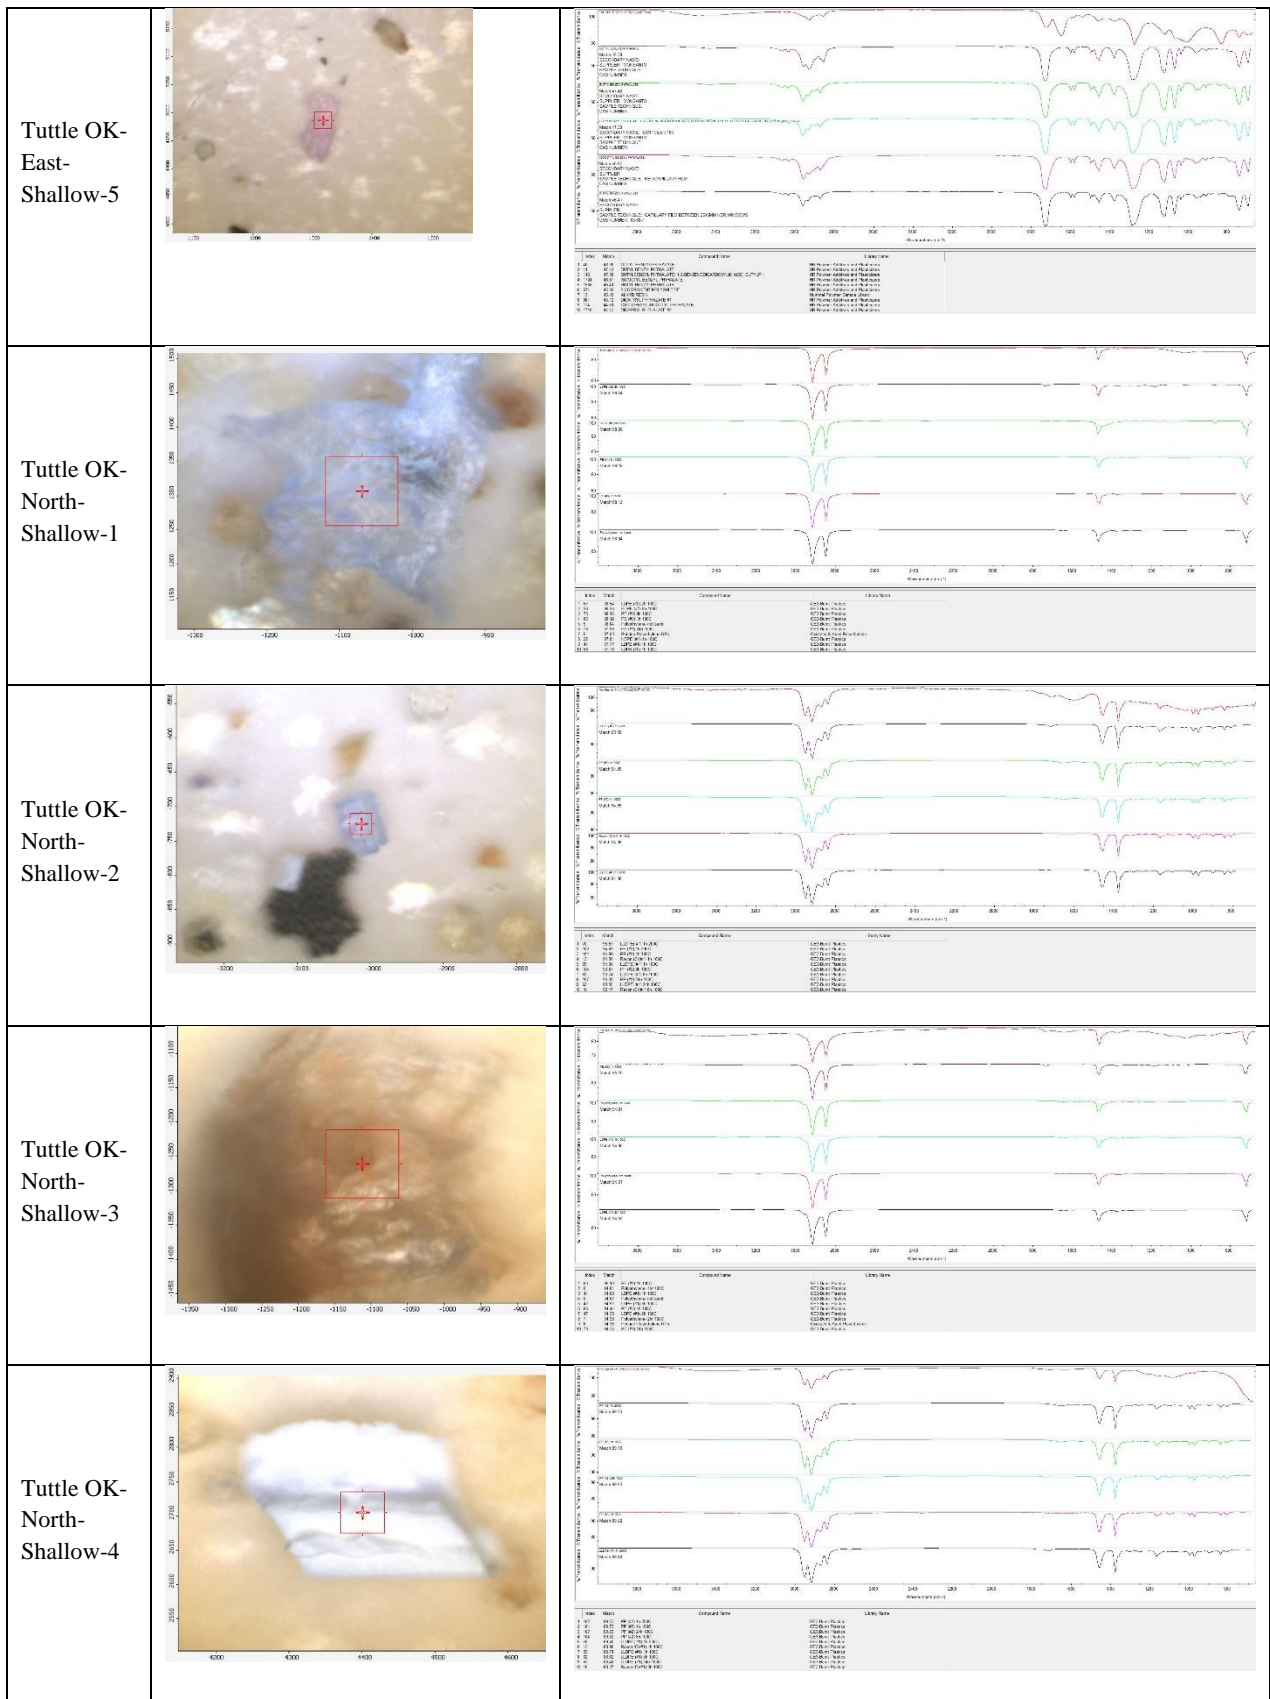



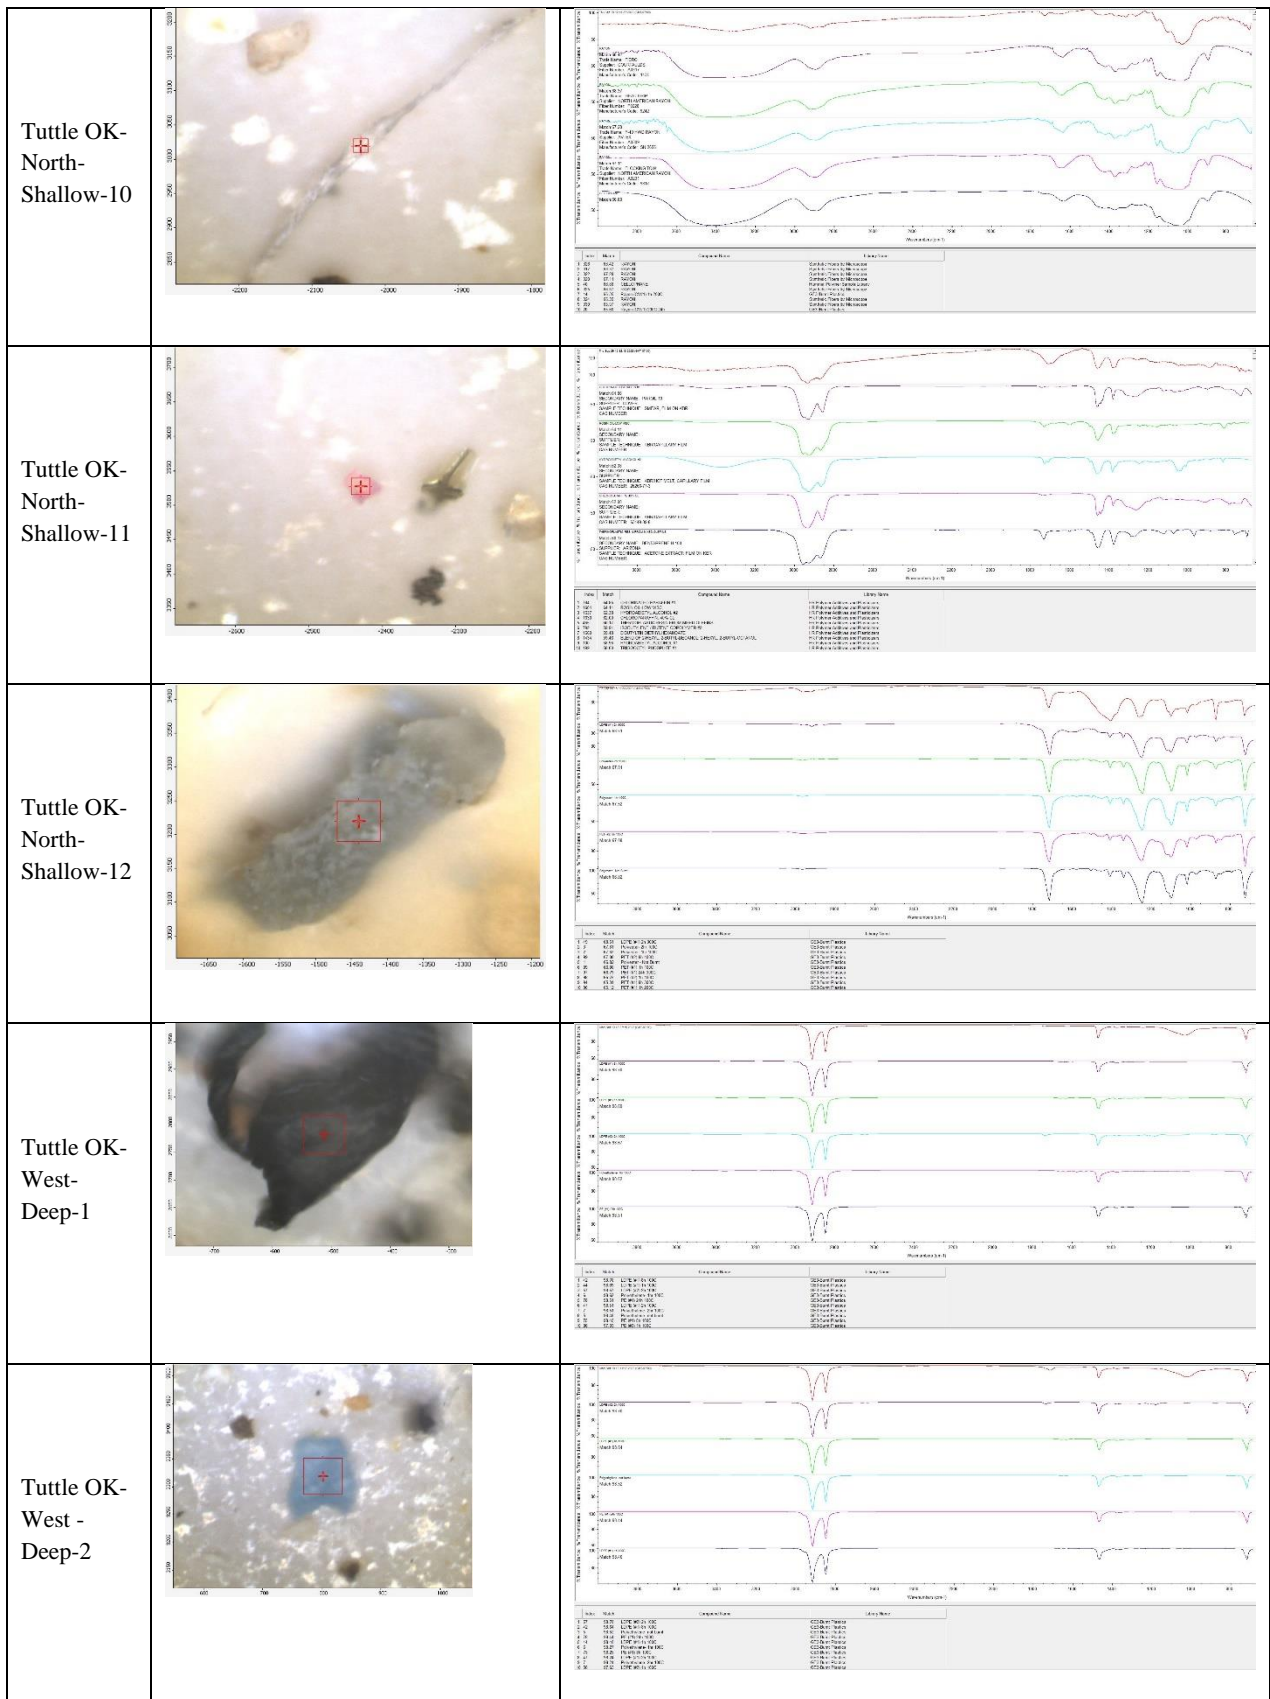

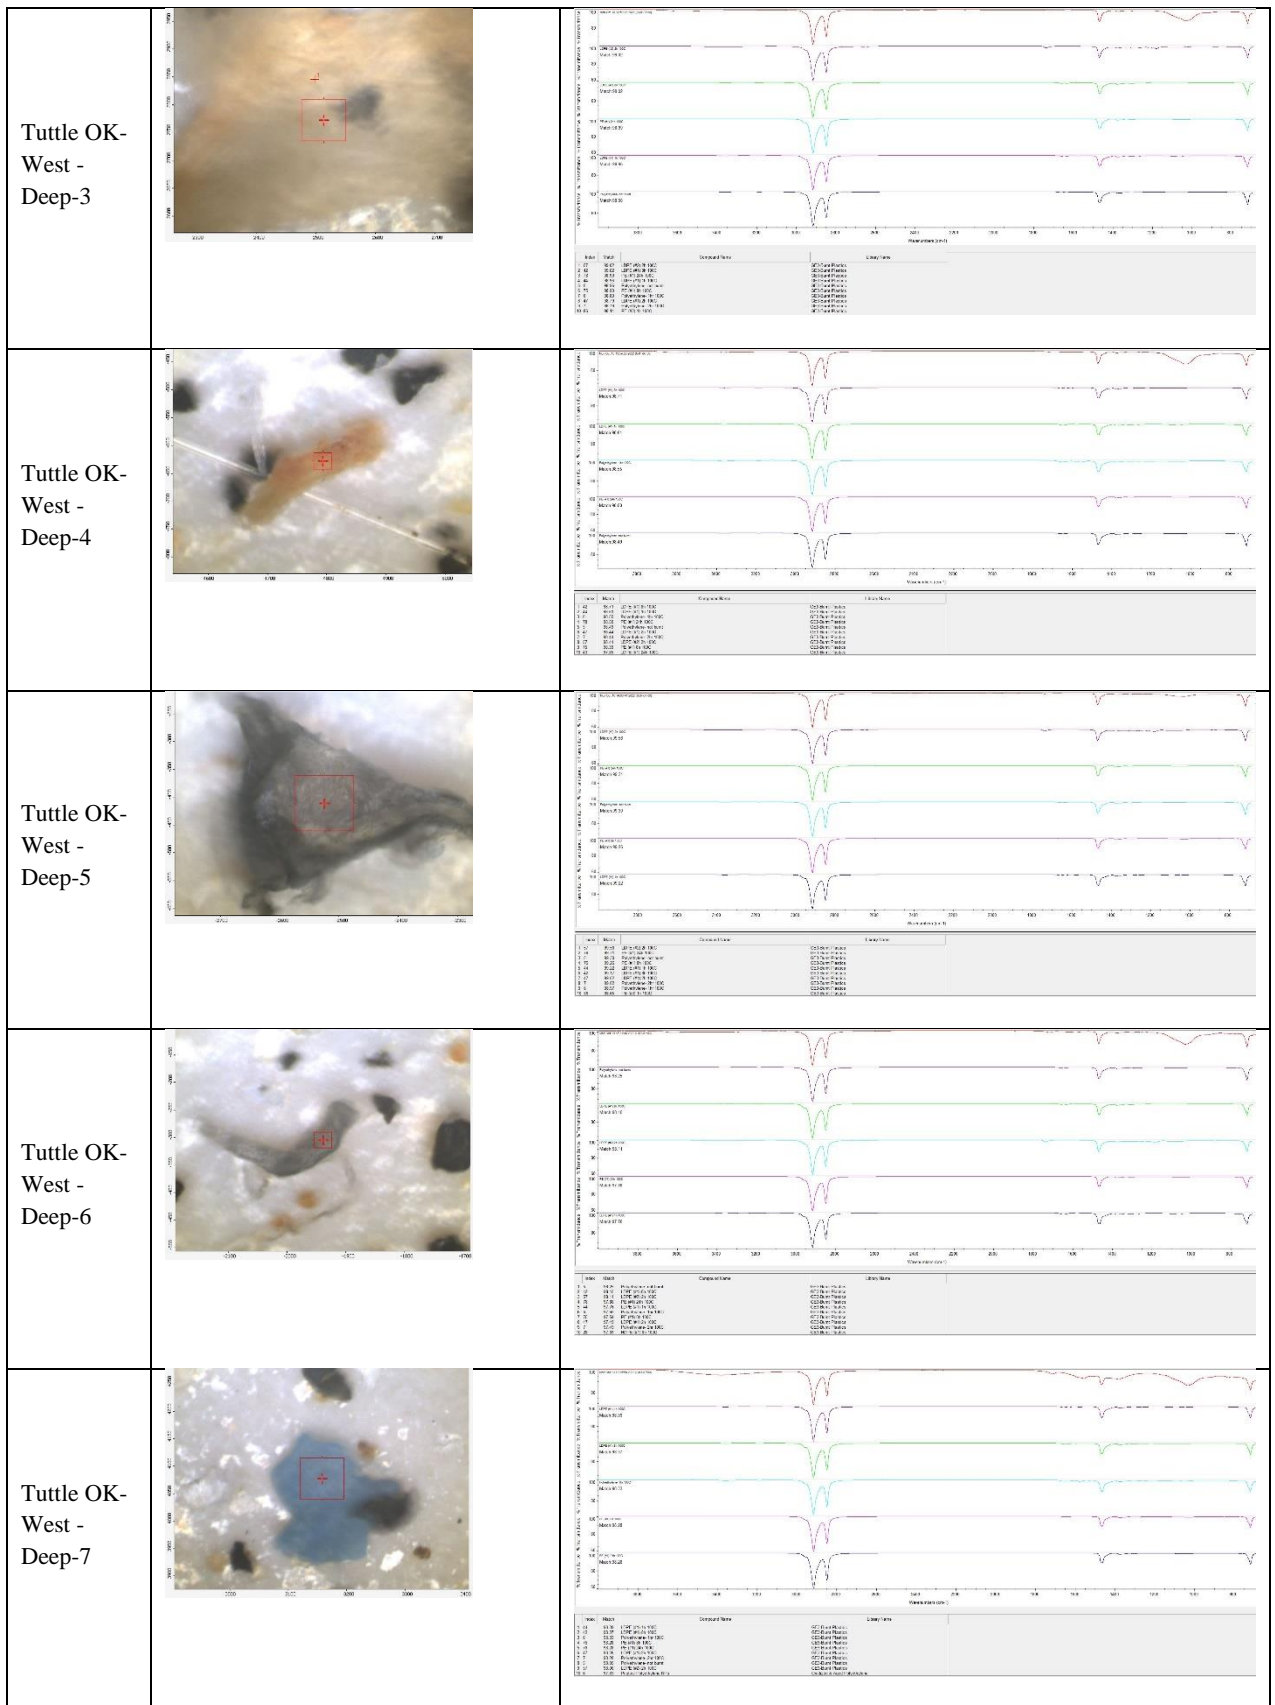



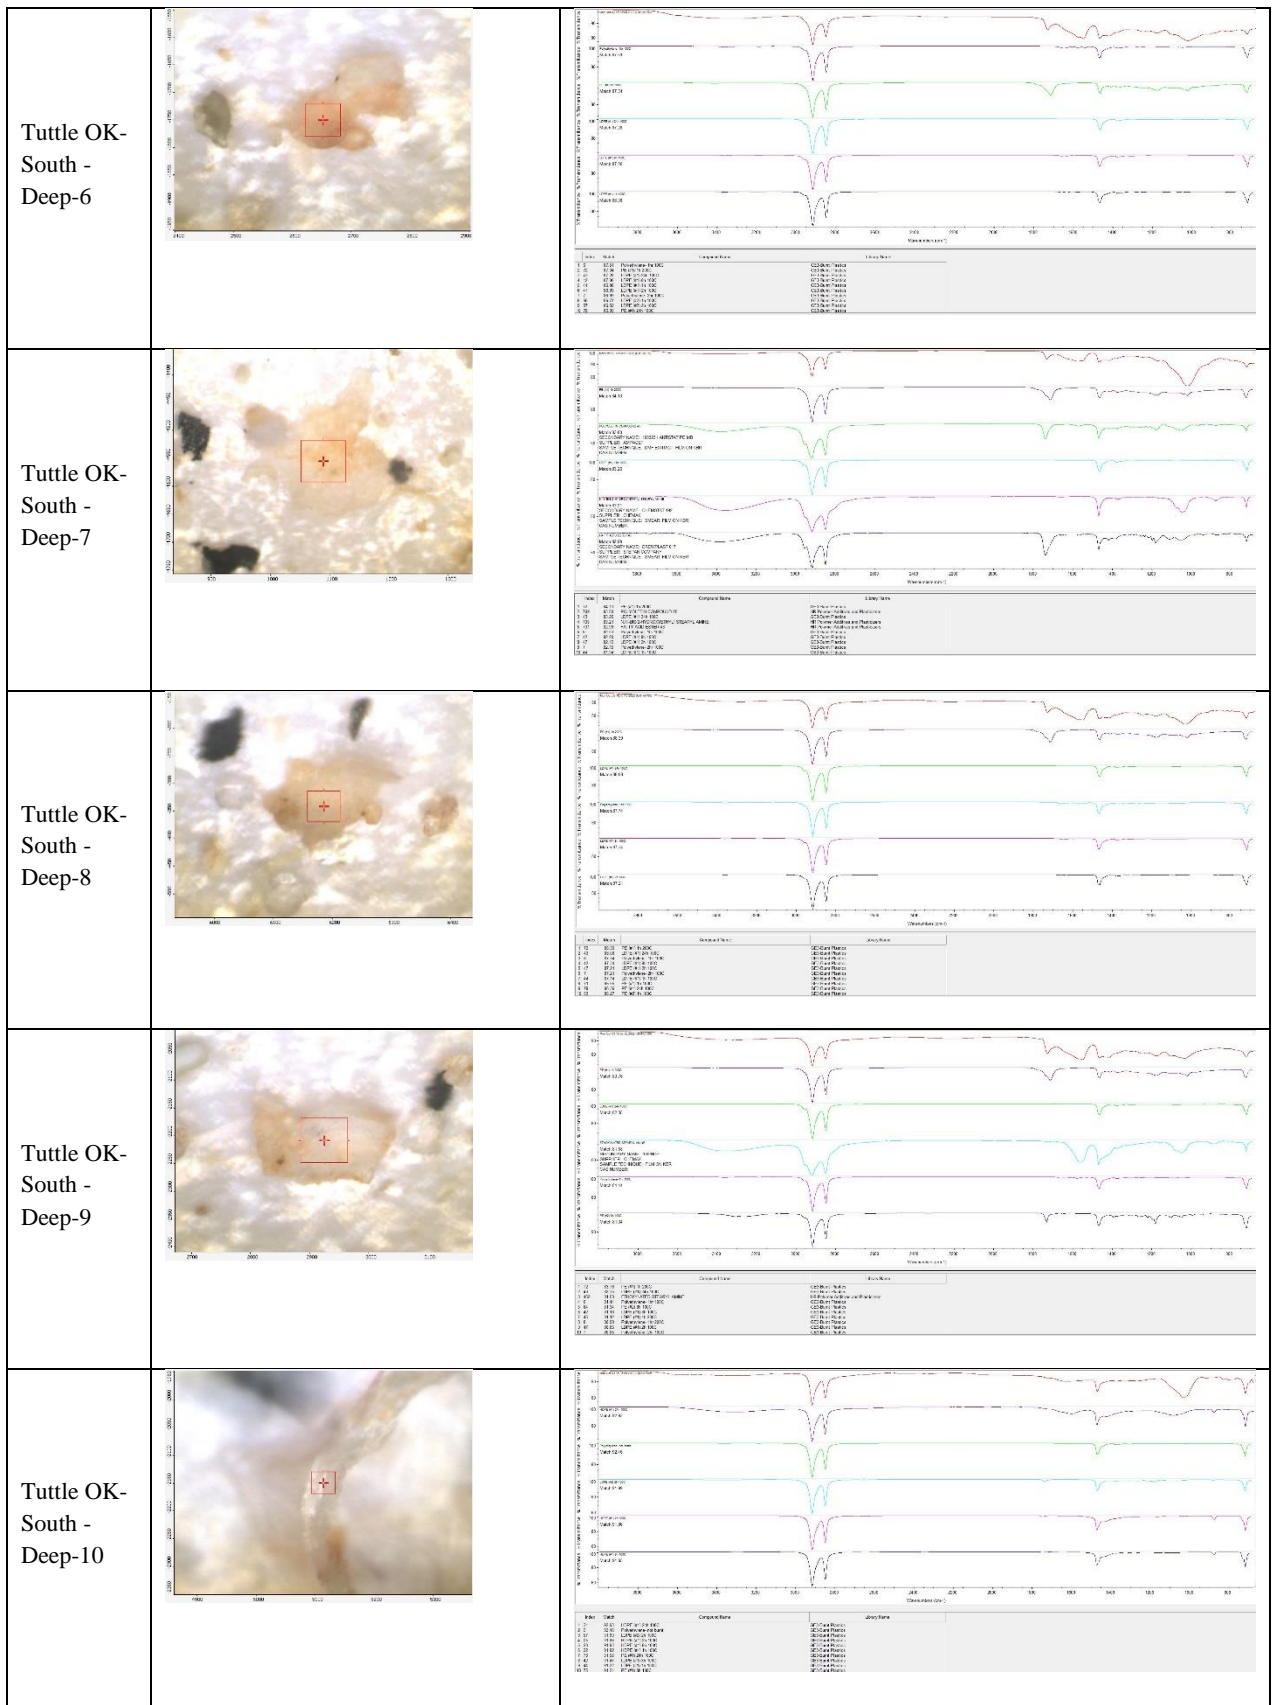





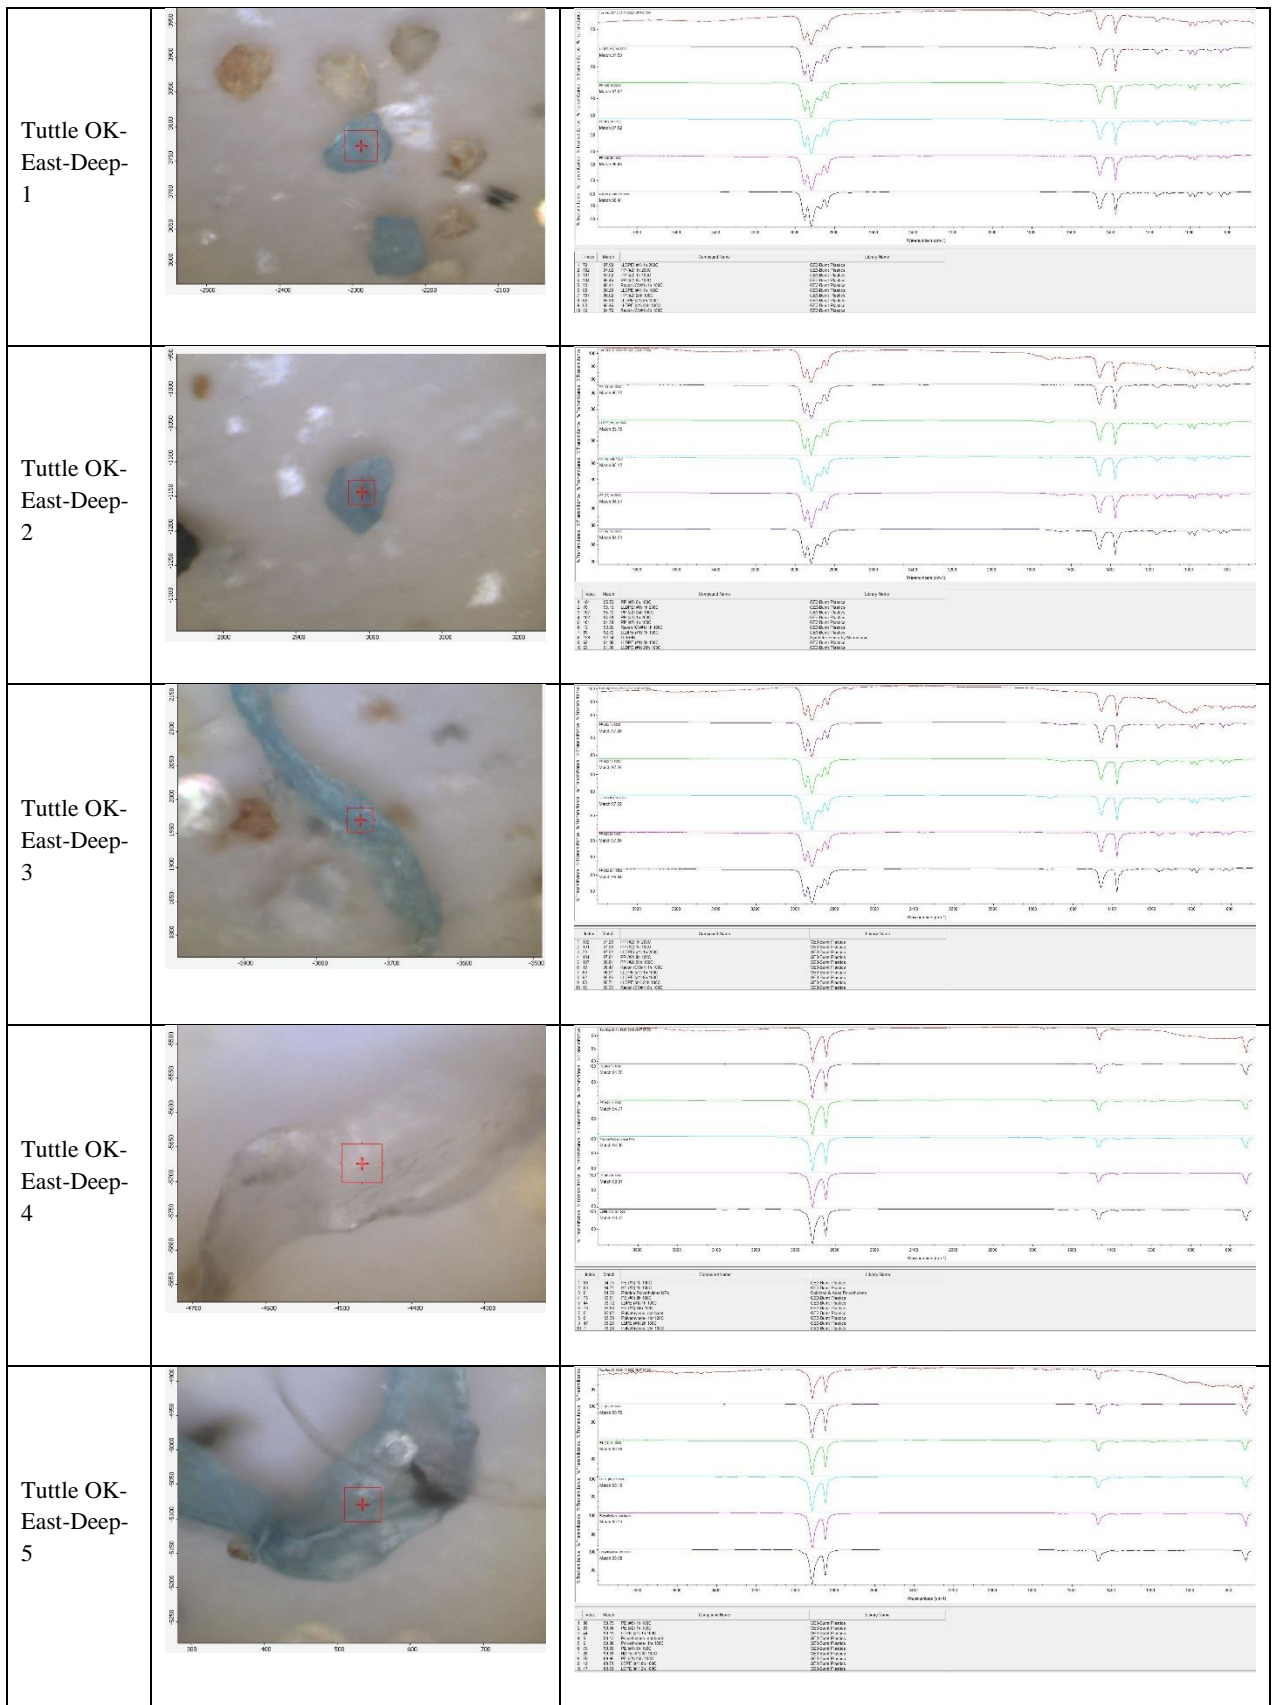

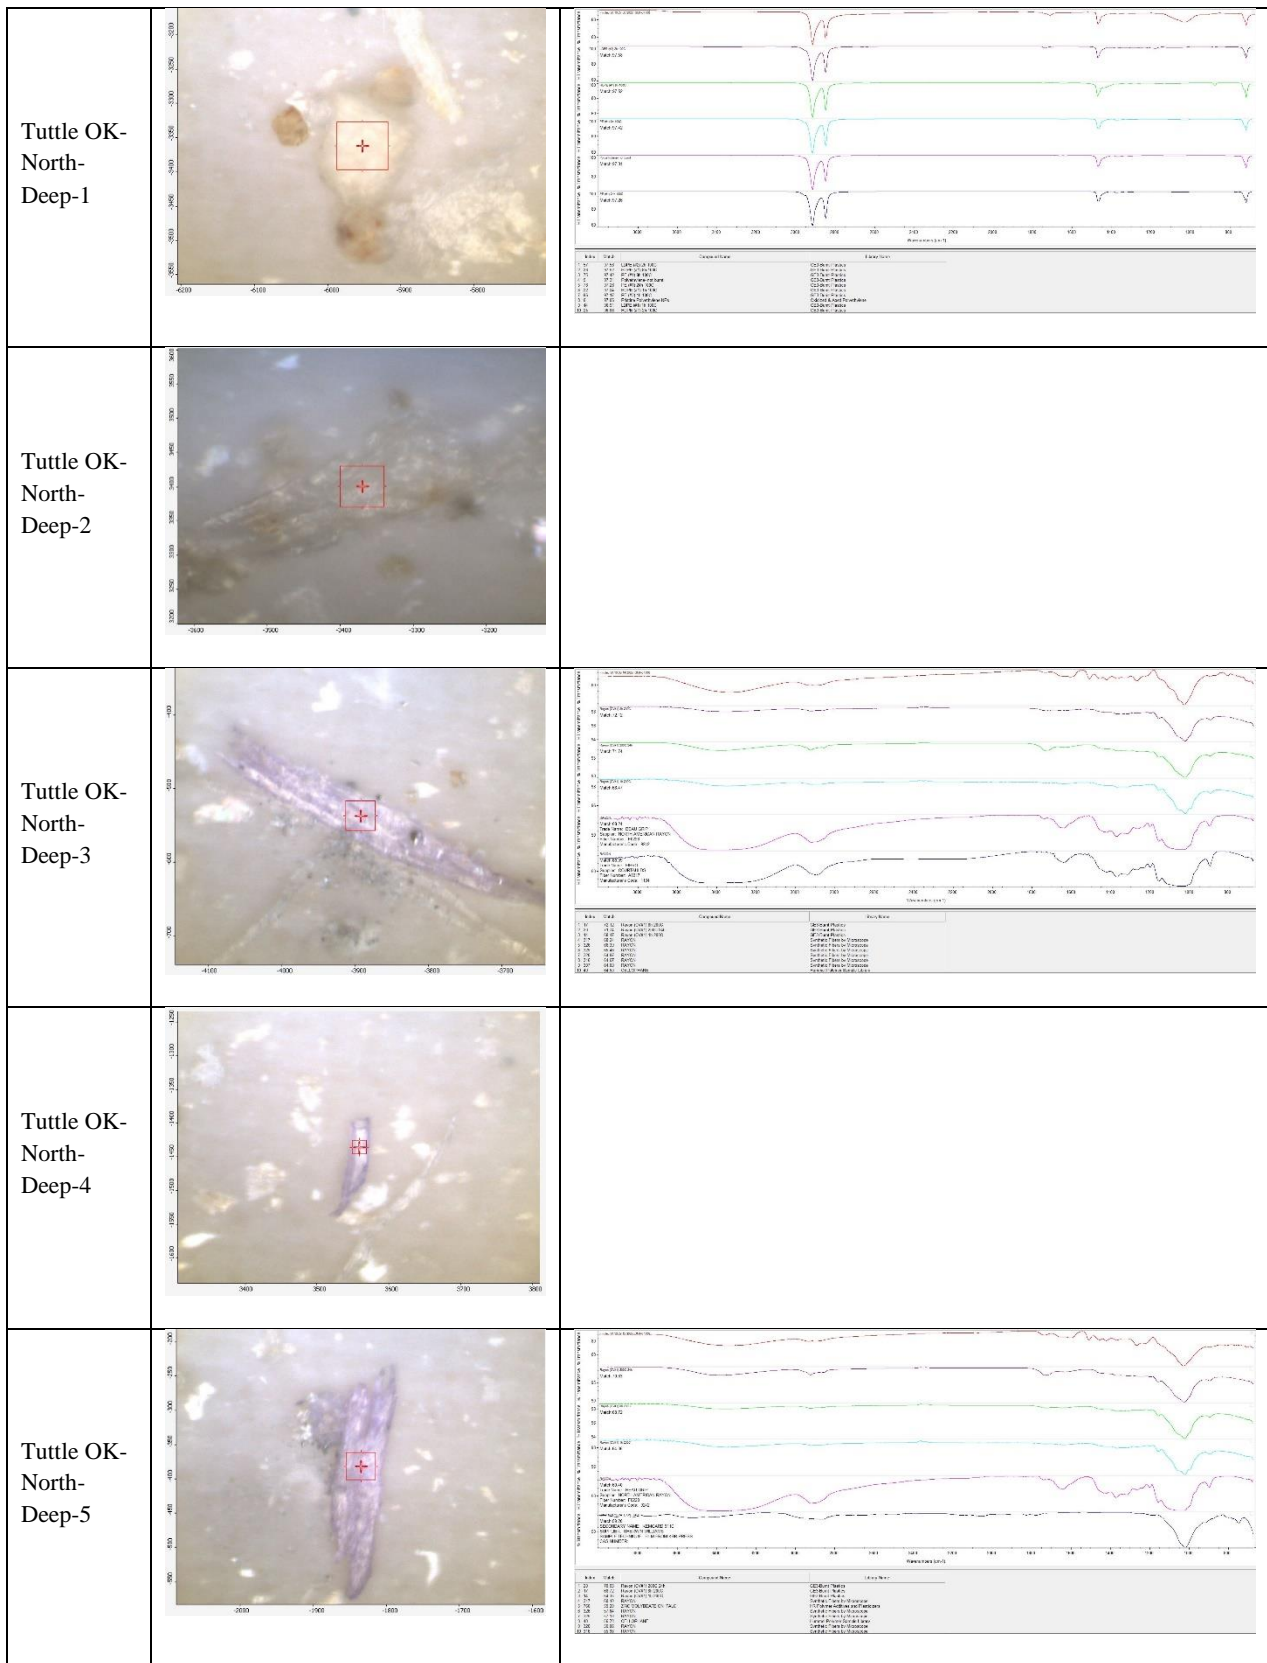

**Table S18: Crow Agency Burn Site ATR-FTIR Particle and Spectra Images**

| <p>CABS-NW-<br/>Shallow-1</p> |                   | <table border="1"> <thead> <tr> <th>Peak</th> <th>Wavenumber (cm⁻¹)</th> <th>Assignment</th> <th>Library Name</th> </tr> </thead> <tbody> <tr><td>1</td><td>3400</td><td>O-H stretch</td><td>Water</td></tr> <tr><td>2</td><td>2900</td><td>C-H stretch</td><td>Alkanes</td></tr> <tr><td>3</td><td>1700</td><td>C=O stretch</td><td>Carbonyl Compounds</td></tr> <tr><td>4</td><td>1600</td><td>Aromatic C=C</td><td>Aromatic Compounds</td></tr> <tr><td>5</td><td>1500</td><td>C=C stretch</td><td>Alkenes</td></tr> <tr><td>6</td><td>1450</td><td>C-O stretch</td><td>Ethers</td></tr> <tr><td>7</td><td>1400</td><td>C=C stretch</td><td>Alkenes</td></tr> <tr><td>8</td><td>1380</td><td>C-O stretch</td><td>Ethers</td></tr> <tr><td>9</td><td>1300</td><td>C-O stretch</td><td>Ethers</td></tr> <tr><td>10</td><td>1250</td><td>C-O stretch</td><td>Ethers</td></tr> <tr><td>11</td><td>1100</td><td>C-O stretch</td><td>Ethers</td></tr> <tr><td>12</td><td>1050</td><td>C-O stretch</td><td>Ethers</td></tr> <tr><td>13</td><td>1000</td><td>C-O stretch</td><td>Ethers</td></tr> <tr><td>14</td><td>950</td><td>C-O stretch</td><td>Ethers</td></tr> <tr><td>15</td><td>900</td><td>C-O stretch</td><td>Ethers</td></tr> <tr><td>16</td><td>850</td><td>C-O stretch</td><td>Ethers</td></tr> <tr><td>17</td><td>800</td><td>C-O stretch</td><td>Ethers</td></tr> <tr><td>18</td><td>750</td><td>C-O stretch</td><td>Ethers</td></tr> <tr><td>19</td><td>700</td><td>C-O stretch</td><td>Ethers</td></tr> <tr><td>20</td><td>650</td><td>C-O stretch</td><td>Ethers</td></tr> <tr><td>21</td><td>600</td><td>C-O stretch</td><td>Ethers</td></tr> </tbody> </table> | Peak               | Wavenumber (cm⁻¹) | Assignment | Library Name | 1 | 3400 | O-H stretch | Water | 2 | 2900 | C-H stretch | Alkanes | 3 | 1700 | C=O stretch | Carbonyl Compounds | 4 | 1600 | Aromatic C=C | Aromatic Compounds | 5 | 1500 | C=C stretch | Alkenes | 6 | 1450 | C-O stretch | Ethers | 7 | 1400 | C=C stretch | Alkenes | 8 | 1380 | C-O stretch | Ethers | 9 | 1300 | C-O stretch | Ethers | 10 | 1250 | C-O stretch | Ethers | 11 | 1100 | C-O stretch | Ethers | 12 | 1050 | C-O stretch | Ethers | 13 | 1000 | C-O stretch | Ethers | 14 | 950 | C-O stretch | Ethers | 15 | 900 | C-O stretch | Ethers | 16 | 850 | C-O stretch | Ethers | 17 | 800 | C-O stretch | Ethers | 18 | 750 | C-O stretch | Ethers | 19 | 700 | C-O stretch | Ethers | 20 | 650 | C-O stretch | Ethers | 21 | 600 | C-O stretch | Ethers |
|-------------------------------|-------------------|--------------------------------------------------------------------------------------------------------------------------------------------------------------------------------------------------------------------------------------------------------------------------------------------------------------------------------------------------------------------------------------------------------------------------------------------------------------------------------------------------------------------------------------------------------------------------------------------------------------------------------------------------------------------------------------------------------------------------------------------------------------------------------------------------------------------------------------------------------------------------------------------------------------------------------------------------------------------------------------------------------------------------------------------------------------------------------------------------------------------------------------------------------------------------------------------------------------------------------------------------------------------------------------------------------------------------------------------------------------------------------------------------------------------------------------------------------------------------------------------------------------------------------------------------------------------------------------------------------------------------------------------------------------------------------|--------------------|-------------------|------------|--------------|---|------|-------------|-------|---|------|-------------|---------|---|------|-------------|--------------------|---|------|--------------|--------------------|---|------|-------------|---------|---|------|-------------|--------|---|------|-------------|---------|---|------|-------------|--------|---|------|-------------|--------|----|------|-------------|--------|----|------|-------------|--------|----|------|-------------|--------|----|------|-------------|--------|----|-----|-------------|--------|----|-----|-------------|--------|----|-----|-------------|--------|----|-----|-------------|--------|----|-----|-------------|--------|----|-----|-------------|--------|----|-----|-------------|--------|----|-----|-------------|--------|
| Peak                          | Wavenumber (cm⁻¹) | Assignment                                                                                                                                                                                                                                                                                                                                                                                                                                                                                                                                                                                                                                                                                                                                                                                                                                                                                                                                                                                                                                                                                                                                                                                                                                                                                                                                                                                                                                                                                                                                                                                                                                                                     | Library Name       |                   |            |              |   |      |             |       |   |      |             |         |   |      |             |                    |   |      |              |                    |   |      |             |         |   |      |             |        |   |      |             |         |   |      |             |        |   |      |             |        |    |      |             |        |    |      |             |        |    |      |             |        |    |      |             |        |    |     |             |        |    |     |             |        |    |     |             |        |    |     |             |        |    |     |             |        |    |     |             |        |    |     |             |        |    |     |             |        |
| 1                             | 3400              | O-H stretch                                                                                                                                                                                                                                                                                                                                                                                                                                                                                                                                                                                                                                                                                                                                                                                                                                                                                                                                                                                                                                                                                                                                                                                                                                                                                                                                                                                                                                                                                                                                                                                                                                                                    | Water              |                   |            |              |   |      |             |       |   |      |             |         |   |      |             |                    |   |      |              |                    |   |      |             |         |   |      |             |        |   |      |             |         |   |      |             |        |   |      |             |        |    |      |             |        |    |      |             |        |    |      |             |        |    |      |             |        |    |     |             |        |    |     |             |        |    |     |             |        |    |     |             |        |    |     |             |        |    |     |             |        |    |     |             |        |    |     |             |        |
| 2                             | 2900              | C-H stretch                                                                                                                                                                                                                                                                                                                                                                                                                                                                                                                                                                                                                                                                                                                                                                                                                                                                                                                                                                                                                                                                                                                                                                                                                                                                                                                                                                                                                                                                                                                                                                                                                                                                    | Alkanes            |                   |            |              |   |      |             |       |   |      |             |         |   |      |             |                    |   |      |              |                    |   |      |             |         |   |      |             |        |   |      |             |         |   |      |             |        |   |      |             |        |    |      |             |        |    |      |             |        |    |      |             |        |    |      |             |        |    |     |             |        |    |     |             |        |    |     |             |        |    |     |             |        |    |     |             |        |    |     |             |        |    |     |             |        |    |     |             |        |
| 3                             | 1700              | C=O stretch                                                                                                                                                                                                                                                                                                                                                                                                                                                                                                                                                                                                                                                                                                                                                                                                                                                                                                                                                                                                                                                                                                                                                                                                                                                                                                                                                                                                                                                                                                                                                                                                                                                                    | Carbonyl Compounds |                   |            |              |   |      |             |       |   |      |             |         |   |      |             |                    |   |      |              |                    |   |      |             |         |   |      |             |        |   |      |             |         |   |      |             |        |   |      |             |        |    |      |             |        |    |      |             |        |    |      |             |        |    |      |             |        |    |     |             |        |    |     |             |        |    |     |             |        |    |     |             |        |    |     |             |        |    |     |             |        |    |     |             |        |    |     |             |        |
| 4                             | 1600              | Aromatic C=C                                                                                                                                                                                                                                                                                                                                                                                                                                                                                                                                                                                                                                                                                                                                                                                                                                                                                                                                                                                                                                                                                                                                                                                                                                                                                                                                                                                                                                                                                                                                                                                                                                                                   | Aromatic Compounds |                   |            |              |   |      |             |       |   |      |             |         |   |      |             |                    |   |      |              |                    |   |      |             |         |   |      |             |        |   |      |             |         |   |      |             |        |   |      |             |        |    |      |             |        |    |      |             |        |    |      |             |        |    |      |             |        |    |     |             |        |    |     |             |        |    |     |             |        |    |     |             |        |    |     |             |        |    |     |             |        |    |     |             |        |    |     |             |        |
| 5                             | 1500              | C=C stretch                                                                                                                                                                                                                                                                                                                                                                                                                                                                                                                                                                                                                                                                                                                                                                                                                                                                                                                                                                                                                                                                                                                                                                                                                                                                                                                                                                                                                                                                                                                                                                                                                                                                    | Alkenes            |                   |            |              |   |      |             |       |   |      |             |         |   |      |             |                    |   |      |              |                    |   |      |             |         |   |      |             |        |   |      |             |         |   |      |             |        |   |      |             |        |    |      |             |        |    |      |             |        |    |      |             |        |    |      |             |        |    |     |             |        |    |     |             |        |    |     |             |        |    |     |             |        |    |     |             |        |    |     |             |        |    |     |             |        |    |     |             |        |
| 6                             | 1450              | C-O stretch                                                                                                                                                                                                                                                                                                                                                                                                                                                                                                                                                                                                                                                                                                                                                                                                                                                                                                                                                                                                                                                                                                                                                                                                                                                                                                                                                                                                                                                                                                                                                                                                                                                                    | Ethers             |                   |            |              |   |      |             |       |   |      |             |         |   |      |             |                    |   |      |              |                    |   |      |             |         |   |      |             |        |   |      |             |         |   |      |             |        |   |      |             |        |    |      |             |        |    |      |             |        |    |      |             |        |    |      |             |        |    |     |             |        |    |     |             |        |    |     |             |        |    |     |             |        |    |     |             |        |    |     |             |        |    |     |             |        |    |     |             |        |
| 7                             | 1400              | C=C stretch                                                                                                                                                                                                                                                                                                                                                                                                                                                                                                                                                                                                                                                                                                                                                                                                                                                                                                                                                                                                                                                                                                                                                                                                                                                                                                                                                                                                                                                                                                                                                                                                                                                                    | Alkenes            |                   |            |              |   |      |             |       |   |      |             |         |   |      |             |                    |   |      |              |                    |   |      |             |         |   |      |             |        |   |      |             |         |   |      |             |        |   |      |             |        |    |      |             |        |    |      |             |        |    |      |             |        |    |      |             |        |    |     |             |        |    |     |             |        |    |     |             |        |    |     |             |        |    |     |             |        |    |     |             |        |    |     |             |        |    |     |             |        |
| 8                             | 1380              | C-O stretch                                                                                                                                                                                                                                                                                                                                                                                                                                                                                                                                                                                                                                                                                                                                                                                                                                                                                                                                                                                                                                                                                                                                                                                                                                                                                                                                                                                                                                                                                                                                                                                                                                                                    | Ethers             |                   |            |              |   |      |             |       |   |      |             |         |   |      |             |                    |   |      |              |                    |   |      |             |         |   |      |             |        |   |      |             |         |   |      |             |        |   |      |             |        |    |      |             |        |    |      |             |        |    |      |             |        |    |      |             |        |    |     |             |        |    |     |             |        |    |     |             |        |    |     |             |        |    |     |             |        |    |     |             |        |    |     |             |        |    |     |             |        |
| 9                             | 1300              | C-O stretch                                                                                                                                                                                                                                                                                                                                                                                                                                                                                                                                                                                                                                                                                                                                                                                                                                                                                                                                                                                                                                                                                                                                                                                                                                                                                                                                                                                                                                                                                                                                                                                                                                                                    | Ethers             |                   |            |              |   |      |             |       |   |      |             |         |   |      |             |                    |   |      |              |                    |   |      |             |         |   |      |             |        |   |      |             |         |   |      |             |        |   |      |             |        |    |      |             |        |    |      |             |        |    |      |             |        |    |      |             |        |    |     |             |        |    |     |             |        |    |     |             |        |    |     |             |        |    |     |             |        |    |     |             |        |    |     |             |        |    |     |             |        |
| 10                            | 1250              | C-O stretch                                                                                                                                                                                                                                                                                                                                                                                                                                                                                                                                                                                                                                                                                                                                                                                                                                                                                                                                                                                                                                                                                                                                                                                                                                                                                                                                                                                                                                                                                                                                                                                                                                                                    | Ethers             |                   |            |              |   |      |             |       |   |      |             |         |   |      |             |                    |   |      |              |                    |   |      |             |         |   |      |             |        |   |      |             |         |   |      |             |        |   |      |             |        |    |      |             |        |    |      |             |        |    |      |             |        |    |      |             |        |    |     |             |        |    |     |             |        |    |     |             |        |    |     |             |        |    |     |             |        |    |     |             |        |    |     |             |        |    |     |             |        |
| 11                            | 1100              | C-O stretch                                                                                                                                                                                                                                                                                                                                                                                                                                                                                                                                                                                                                                                                                                                                                                                                                                                                                                                                                                                                                                                                                                                                                                                                                                                                                                                                                                                                                                                                                                                                                                                                                                                                    | Ethers             |                   |            |              |   |      |             |       |   |      |             |         |   |      |             |                    |   |      |              |                    |   |      |             |         |   |      |             |        |   |      |             |         |   |      |             |        |   |      |             |        |    |      |             |        |    |      |             |        |    |      |             |        |    |      |             |        |    |     |             |        |    |     |             |        |    |     |             |        |    |     |             |        |    |     |             |        |    |     |             |        |    |     |             |        |    |     |             |        |
| 12                            | 1050              | C-O stretch                                                                                                                                                                                                                                                                                                                                                                                                                                                                                                                                                                                                                                                                                                                                                                                                                                                                                                                                                                                                                                                                                                                                                                                                                                                                                                                                                                                                                                                                                                                                                                                                                                                                    | Ethers             |                   |            |              |   |      |             |       |   |      |             |         |   |      |             |                    |   |      |              |                    |   |      |             |         |   |      |             |        |   |      |             |         |   |      |             |        |   |      |             |        |    |      |             |        |    |      |             |        |    |      |             |        |    |      |             |        |    |     |             |        |    |     |             |        |    |     |             |        |    |     |             |        |    |     |             |        |    |     |             |        |    |     |             |        |    |     |             |        |
| 13                            | 1000              | C-O stretch                                                                                                                                                                                                                                                                                                                                                                                                                                                                                                                                                                                                                                                                                                                                                                                                                                                                                                                                                                                                                                                                                                                                                                                                                                                                                                                                                                                                                                                                                                                                                                                                                                                                    | Ethers             |                   |            |              |   |      |             |       |   |      |             |         |   |      |             |                    |   |      |              |                    |   |      |             |         |   |      |             |        |   |      |             |         |   |      |             |        |   |      |             |        |    |      |             |        |    |      |             |        |    |      |             |        |    |      |             |        |    |     |             |        |    |     |             |        |    |     |             |        |    |     |             |        |    |     |             |        |    |     |             |        |    |     |             |        |    |     |             |        |
| 14                            | 950               | C-O stretch                                                                                                                                                                                                                                                                                                                                                                                                                                                                                                                                                                                                                                                                                                                                                                                                                                                                                                                                                                                                                                                                                                                                                                                                                                                                                                                                                                                                                                                                                                                                                                                                                                                                    | Ethers             |                   |            |              |   |      |             |       |   |      |             |         |   |      |             |                    |   |      |              |                    |   |      |             |         |   |      |             |        |   |      |             |         |   |      |             |        |   |      |             |        |    |      |             |        |    |      |             |        |    |      |             |        |    |      |             |        |    |     |             |        |    |     |             |        |    |     |             |        |    |     |             |        |    |     |             |        |    |     |             |        |    |     |             |        |    |     |             |        |
| 15                            | 900               | C-O stretch                                                                                                                                                                                                                                                                                                                                                                                                                                                                                                                                                                                                                                                                                                                                                                                                                                                                                                                                                                                                                                                                                                                                                                                                                                                                                                                                                                                                                                                                                                                                                                                                                                                                    | Ethers             |                   |            |              |   |      |             |       |   |      |             |         |   |      |             |                    |   |      |              |                    |   |      |             |         |   |      |             |        |   |      |             |         |   |      |             |        |   |      |             |        |    |      |             |        |    |      |             |        |    |      |             |        |    |      |             |        |    |     |             |        |    |     |             |        |    |     |             |        |    |     |             |        |    |     |             |        |    |     |             |        |    |     |             |        |    |     |             |        |
| 16                            | 850               | C-O stretch                                                                                                                                                                                                                                                                                                                                                                                                                                                                                                                                                                                                                                                                                                                                                                                                                                                                                                                                                                                                                                                                                                                                                                                                                                                                                                                                                                                                                                                                                                                                                                                                                                                                    | Ethers             |                   |            |              |   |      |             |       |   |      |             |         |   |      |             |                    |   |      |              |                    |   |      |             |         |   |      |             |        |   |      |             |         |   |      |             |        |   |      |             |        |    |      |             |        |    |      |             |        |    |      |             |        |    |      |             |        |    |     |             |        |    |     |             |        |    |     |             |        |    |     |             |        |    |     |             |        |    |     |             |        |    |     |             |        |    |     |             |        |
| 17                            | 800               | C-O stretch                                                                                                                                                                                                                                                                                                                                                                                                                                                                                                                                                                                                                                                                                                                                                                                                                                                                                                                                                                                                                                                                                                                                                                                                                                                                                                                                                                                                                                                                                                                                                                                                                                                                    | Ethers             |                   |            |              |   |      |             |       |   |      |             |         |   |      |             |                    |   |      |              |                    |   |      |             |         |   |      |             |        |   |      |             |         |   |      |             |        |   |      |             |        |    |      |             |        |    |      |             |        |    |      |             |        |    |      |             |        |    |     |             |        |    |     |             |        |    |     |             |        |    |     |             |        |    |     |             |        |    |     |             |        |    |     |             |        |    |     |             |        |
| 18                            | 750               | C-O stretch                                                                                                                                                                                                                                                                                                                                                                                                                                                                                                                                                                                                                                                                                                                                                                                                                                                                                                                                                                                                                                                                                                                                                                                                                                                                                                                                                                                                                                                                                                                                                                                                                                                                    | Ethers             |                   |            |              |   |      |             |       |   |      |             |         |   |      |             |                    |   |      |              |                    |   |      |             |         |   |      |             |        |   |      |             |         |   |      |             |        |   |      |             |        |    |      |             |        |    |      |             |        |    |      |             |        |    |      |             |        |    |     |             |        |    |     |             |        |    |     |             |        |    |     |             |        |    |     |             |        |    |     |             |        |    |     |             |        |    |     |             |        |
| 19                            | 700               | C-O stretch                                                                                                                                                                                                                                                                                                                                                                                                                                                                                                                                                                                                                                                                                                                                                                                                                                                                                                                                                                                                                                                                                                                                                                                                                                                                                                                                                                                                                                                                                                                                                                                                                                                                    | Ethers             |                   |            |              |   |      |             |       |   |      |             |         |   |      |             |                    |   |      |              |                    |   |      |             |         |   |      |             |        |   |      |             |         |   |      |             |        |   |      |             |        |    |      |             |        |    |      |             |        |    |      |             |        |    |      |             |        |    |     |             |        |    |     |             |        |    |     |             |        |    |     |             |        |    |     |             |        |    |     |             |        |    |     |             |        |    |     |             |        |
| 20                            | 650               | C-O stretch                                                                                                                                                                                                                                                                                                                                                                                                                                                                                                                                                                                                                                                                                                                                                                                                                                                                                                                                                                                                                                                                                                                                                                                                                                                                                                                                                                                                                                                                                                                                                                                                                                                                    | Ethers             |                   |            |              |   |      |             |       |   |      |             |         |   |      |             |                    |   |      |              |                    |   |      |             |         |   |      |             |        |   |      |             |         |   |      |             |        |   |      |             |        |    |      |             |        |    |      |             |        |    |      |             |        |    |      |             |        |    |     |             |        |    |     |             |        |    |     |             |        |    |     |             |        |    |     |             |        |    |     |             |        |    |     |             |        |    |     |             |        |
| 21                            | 600               | C-O stretch                                                                                                                                                                                                                                                                                                                                                                                                                                                                                                                                                                                                                                                                                                                                                                                                                                                                                                                                                                                                                                                                                                                                                                                                                                                                                                                                                                                                                                                                                                                                                                                                                                                                    | Ethers             |                   |            |              |   |      |             |       |   |      |             |         |   |      |             |                    |   |      |              |                    |   |      |             |         |   |      |             |        |   |      |             |         |   |      |             |        |   |      |             |        |    |      |             |        |    |      |             |        |    |      |             |        |    |      |             |        |    |     |             |        |    |     |             |        |    |     |             |        |    |     |             |        |    |     |             |        |    |     |             |        |    |     |             |        |    |     |             |        |
| <p>CABS-NW-<br/>Shallow-2</p> |                   | <table border="1"> <thead> <tr> <th>Peak</th> <th>Wavenumber (cm⁻¹)</th> <th>Assignment</th> <th>Library Name</th> </tr> </thead> <tbody> <tr><td>1</td><td>3400</td><td>O-H stretch</td><td>Water</td></tr> <tr><td>2</td><td>2900</td><td>C-H stretch</td><td>Alkanes</td></tr> <tr><td>3</td><td>1700</td><td>C=O stretch</td><td>Carbonyl Compounds</td></tr> <tr><td>4</td><td>1600</td><td>Aromatic C=C</td><td>Aromatic Compounds</td></tr> <tr><td>5</td><td>1500</td><td>C=C stretch</td><td>Alkenes</td></tr> <tr><td>6</td><td>1450</td><td>C-O stretch</td><td>Ethers</td></tr> <tr><td>7</td><td>1400</td><td>C=C stretch</td><td>Alkenes</td></tr> <tr><td>8</td><td>1380</td><td>C-O stretch</td><td>Ethers</td></tr> <tr><td>9</td><td>1300</td><td>C-O stretch</td><td>Ethers</td></tr> <tr><td>10</td><td>1250</td><td>C-O stretch</td><td>Ethers</td></tr> <tr><td>11</td><td>1100</td><td>C-O stretch</td><td>Ethers</td></tr> <tr><td>12</td><td>1050</td><td>C-O stretch</td><td>Ethers</td></tr> <tr><td>13</td><td>1000</td><td>C-O stretch</td><td>Ethers</td></tr> <tr><td>14</td><td>950</td><td>C-O stretch</td><td>Ethers</td></tr> <tr><td>15</td><td>900</td><td>C-O stretch</td><td>Ethers</td></tr> <tr><td>16</td><td>850</td><td>C-O stretch</td><td>Ethers</td></tr> <tr><td>17</td><td>800</td><td>C-O stretch</td><td>Ethers</td></tr> <tr><td>18</td><td>750</td><td>C-O stretch</td><td>Ethers</td></tr> <tr><td>19</td><td>700</td><td>C-O stretch</td><td>Ethers</td></tr> <tr><td>20</td><td>650</td><td>C-O stretch</td><td>Ethers</td></tr> <tr><td>21</td><td>600</td><td>C-O stretch</td><td>Ethers</td></tr> </tbody> </table> | Peak               | Wavenumber (cm⁻¹) | Assignment | Library Name | 1 | 3400 | O-H stretch | Water | 2 | 2900 | C-H stretch | Alkanes | 3 | 1700 | C=O stretch | Carbonyl Compounds | 4 | 1600 | Aromatic C=C | Aromatic Compounds | 5 | 1500 | C=C stretch | Alkenes | 6 | 1450 | C-O stretch | Ethers | 7 | 1400 | C=C stretch | Alkenes | 8 | 1380 | C-O stretch | Ethers | 9 | 1300 | C-O stretch | Ethers | 10 | 1250 | C-O stretch | Ethers | 11 | 1100 | C-O stretch | Ethers | 12 | 1050 | C-O stretch | Ethers | 13 | 1000 | C-O stretch | Ethers | 14 | 950 | C-O stretch | Ethers | 15 | 900 | C-O stretch | Ethers | 16 | 850 | C-O stretch | Ethers | 17 | 800 | C-O stretch | Ethers | 18 | 750 | C-O stretch | Ethers | 19 | 700 | C-O stretch | Ethers | 20 | 650 | C-O stretch | Ethers | 21 | 600 | C-O stretch | Ethers |
| Peak                          | Wavenumber (cm⁻¹) | Assignment                                                                                                                                                                                                                                                                                                                                                                                                                                                                                                                                                                                                                                                                                                                                                                                                                                                                                                                                                                                                                                                                                                                                                                                                                                                                                                                                                                                                                                                                                                                                                                                                                                                                     | Library Name       |                   |            |              |   |      |             |       |   |      |             |         |   |      |             |                    |   |      |              |                    |   |      |             |         |   |      |             |        |   |      |             |         |   |      |             |        |   |      |             |        |    |      |             |        |    |      |             |        |    |      |             |        |    |      |             |        |    |     |             |        |    |     |             |        |    |     |             |        |    |     |             |        |    |     |             |        |    |     |             |        |    |     |             |        |    |     |             |        |
| 1                             | 3400              | O-H stretch                                                                                                                                                                                                                                                                                                                                                                                                                                                                                                                                                                                                                                                                                                                                                                                                                                                                                                                                                                                                                                                                                                                                                                                                                                                                                                                                                                                                                                                                                                                                                                                                                                                                    | Water              |                   |            |              |   |      |             |       |   |      |             |         |   |      |             |                    |   |      |              |                    |   |      |             |         |   |      |             |        |   |      |             |         |   |      |             |        |   |      |             |        |    |      |             |        |    |      |             |        |    |      |             |        |    |      |             |        |    |     |             |        |    |     |             |        |    |     |             |        |    |     |             |        |    |     |             |        |    |     |             |        |    |     |             |        |    |     |             |        |
| 2                             | 2900              | C-H stretch                                                                                                                                                                                                                                                                                                                                                                                                                                                                                                                                                                                                                                                                                                                                                                                                                                                                                                                                                                                                                                                                                                                                                                                                                                                                                                                                                                                                                                                                                                                                                                                                                                                                    | Alkanes            |                   |            |              |   |      |             |       |   |      |             |         |   |      |             |                    |   |      |              |                    |   |      |             |         |   |      |             |        |   |      |             |         |   |      |             |        |   |      |             |        |    |      |             |        |    |      |             |        |    |      |             |        |    |      |             |        |    |     |             |        |    |     |             |        |    |     |             |        |    |     |             |        |    |     |             |        |    |     |             |        |    |     |             |        |    |     |             |        |
| 3                             | 1700              | C=O stretch                                                                                                                                                                                                                                                                                                                                                                                                                                                                                                                                                                                                                                                                                                                                                                                                                                                                                                                                                                                                                                                                                                                                                                                                                                                                                                                                                                                                                                                                                                                                                                                                                                                                    | Carbonyl Compounds |                   |            |              |   |      |             |       |   |      |             |         |   |      |             |                    |   |      |              |                    |   |      |             |         |   |      |             |        |   |      |             |         |   |      |             |        |   |      |             |        |    |      |             |        |    |      |             |        |    |      |             |        |    |      |             |        |    |     |             |        |    |     |             |        |    |     |             |        |    |     |             |        |    |     |             |        |    |     |             |        |    |     |             |        |    |     |             |        |
| 4                             | 1600              | Aromatic C=C                                                                                                                                                                                                                                                                                                                                                                                                                                                                                                                                                                                                                                                                                                                                                                                                                                                                                                                                                                                                                                                                                                                                                                                                                                                                                                                                                                                                                                                                                                                                                                                                                                                                   | Aromatic Compounds |                   |            |              |   |      |             |       |   |      |             |         |   |      |             |                    |   |      |              |                    |   |      |             |         |   |      |             |        |   |      |             |         |   |      |             |        |   |      |             |        |    |      |             |        |    |      |             |        |    |      |             |        |    |      |             |        |    |     |             |        |    |     |             |        |    |     |             |        |    |     |             |        |    |     |             |        |    |     |             |        |    |     |             |        |    |     |             |        |
| 5                             | 1500              | C=C stretch                                                                                                                                                                                                                                                                                                                                                                                                                                                                                                                                                                                                                                                                                                                                                                                                                                                                                                                                                                                                                                                                                                                                                                                                                                                                                                                                                                                                                                                                                                                                                                                                                                                                    | Alkenes            |                   |            |              |   |      |             |       |   |      |             |         |   |      |             |                    |   |      |              |                    |   |      |             |         |   |      |             |        |   |      |             |         |   |      |             |        |   |      |             |        |    |      |             |        |    |      |             |        |    |      |             |        |    |      |             |        |    |     |             |        |    |     |             |        |    |     |             |        |    |     |             |        |    |     |             |        |    |     |             |        |    |     |             |        |    |     |             |        |
| 6                             | 1450              | C-O stretch                                                                                                                                                                                                                                                                                                                                                                                                                                                                                                                                                                                                                                                                                                                                                                                                                                                                                                                                                                                                                                                                                                                                                                                                                                                                                                                                                                                                                                                                                                                                                                                                                                                                    | Ethers             |                   |            |              |   |      |             |       |   |      |             |         |   |      |             |                    |   |      |              |                    |   |      |             |         |   |      |             |        |   |      |             |         |   |      |             |        |   |      |             |        |    |      |             |        |    |      |             |        |    |      |             |        |    |      |             |        |    |     |             |        |    |     |             |        |    |     |             |        |    |     |             |        |    |     |             |        |    |     |             |        |    |     |             |        |    |     |             |        |
| 7                             | 1400              | C=C stretch                                                                                                                                                                                                                                                                                                                                                                                                                                                                                                                                                                                                                                                                                                                                                                                                                                                                                                                                                                                                                                                                                                                                                                                                                                                                                                                                                                                                                                                                                                                                                                                                                                                                    | Alkenes            |                   |            |              |   |      |             |       |   |      |             |         |   |      |             |                    |   |      |              |                    |   |      |             |         |   |      |             |        |   |      |             |         |   |      |             |        |   |      |             |        |    |      |             |        |    |      |             |        |    |      |             |        |    |      |             |        |    |     |             |        |    |     |             |        |    |     |             |        |    |     |             |        |    |     |             |        |    |     |             |        |    |     |             |        |    |     |             |        |
| 8                             | 1380              | C-O stretch                                                                                                                                                                                                                                                                                                                                                                                                                                                                                                                                                                                                                                                                                                                                                                                                                                                                                                                                                                                                                                                                                                                                                                                                                                                                                                                                                                                                                                                                                                                                                                                                                                                                    | Ethers             |                   |            |              |   |      |             |       |   |      |             |         |   |      |             |                    |   |      |              |                    |   |      |             |         |   |      |             |        |   |      |             |         |   |      |             |        |   |      |             |        |    |      |             |        |    |      |             |        |    |      |             |        |    |      |             |        |    |     |             |        |    |     |             |        |    |     |             |        |    |     |             |        |    |     |             |        |    |     |             |        |    |     |             |        |    |     |             |        |
| 9                             | 1300              | C-O stretch                                                                                                                                                                                                                                                                                                                                                                                                                                                                                                                                                                                                                                                                                                                                                                                                                                                                                                                                                                                                                                                                                                                                                                                                                                                                                                                                                                                                                                                                                                                                                                                                                                                                    | Ethers             |                   |            |              |   |      |             |       |   |      |             |         |   |      |             |                    |   |      |              |                    |   |      |             |         |   |      |             |        |   |      |             |         |   |      |             |        |   |      |             |        |    |      |             |        |    |      |             |        |    |      |             |        |    |      |             |        |    |     |             |        |    |     |             |        |    |     |             |        |    |     |             |        |    |     |             |        |    |     |             |        |    |     |             |        |    |     |             |        |
| 10                            | 1250              | C-O stretch                                                                                                                                                                                                                                                                                                                                                                                                                                                                                                                                                                                                                                                                                                                                                                                                                                                                                                                                                                                                                                                                                                                                                                                                                                                                                                                                                                                                                                                                                                                                                                                                                                                                    | Ethers             |                   |            |              |   |      |             |       |   |      |             |         |   |      |             |                    |   |      |              |                    |   |      |             |         |   |      |             |        |   |      |             |         |   |      |             |        |   |      |             |        |    |      |             |        |    |      |             |        |    |      |             |        |    |      |             |        |    |     |             |        |    |     |             |        |    |     |             |        |    |     |             |        |    |     |             |        |    |     |             |        |    |     |             |        |    |     |             |        |
| 11                            | 1100              | C-O stretch                                                                                                                                                                                                                                                                                                                                                                                                                                                                                                                                                                                                                                                                                                                                                                                                                                                                                                                                                                                                                                                                                                                                                                                                                                                                                                                                                                                                                                                                                                                                                                                                                                                                    | Ethers             |                   |            |              |   |      |             |       |   |      |             |         |   |      |             |                    |   |      |              |                    |   |      |             |         |   |      |             |        |   |      |             |         |   |      |             |        |   |      |             |        |    |      |             |        |    |      |             |        |    |      |             |        |    |      |             |        |    |     |             |        |    |     |             |        |    |     |             |        |    |     |             |        |    |     |             |        |    |     |             |        |    |     |             |        |    |     |             |        |
| 12                            | 1050              | C-O stretch                                                                                                                                                                                                                                                                                                                                                                                                                                                                                                                                                                                                                                                                                                                                                                                                                                                                                                                                                                                                                                                                                                                                                                                                                                                                                                                                                                                                                                                                                                                                                                                                                                                                    | Ethers             |                   |            |              |   |      |             |       |   |      |             |         |   |      |             |                    |   |      |              |                    |   |      |             |         |   |      |             |        |   |      |             |         |   |      |             |        |   |      |             |        |    |      |             |        |    |      |             |        |    |      |             |        |    |      |             |        |    |     |             |        |    |     |             |        |    |     |             |        |    |     |             |        |    |     |             |        |    |     |             |        |    |     |             |        |    |     |             |        |
| 13                            | 1000              | C-O stretch                                                                                                                                                                                                                                                                                                                                                                                                                                                                                                                                                                                                                                                                                                                                                                                                                                                                                                                                                                                                                                                                                                                                                                                                                                                                                                                                                                                                                                                                                                                                                                                                                                                                    | Ethers             |                   |            |              |   |      |             |       |   |      |             |         |   |      |             |                    |   |      |              |                    |   |      |             |         |   |      |             |        |   |      |             |         |   |      |             |        |   |      |             |        |    |      |             |        |    |      |             |        |    |      |             |        |    |      |             |        |    |     |             |        |    |     |             |        |    |     |             |        |    |     |             |        |    |     |             |        |    |     |             |        |    |     |             |        |    |     |             |        |
| 14                            | 950               | C-O stretch                                                                                                                                                                                                                                                                                                                                                                                                                                                                                                                                                                                                                                                                                                                                                                                                                                                                                                                                                                                                                                                                                                                                                                                                                                                                                                                                                                                                                                                                                                                                                                                                                                                                    | Ethers             |                   |            |              |   |      |             |       |   |      |             |         |   |      |             |                    |   |      |              |                    |   |      |             |         |   |      |             |        |   |      |             |         |   |      |             |        |   |      |             |        |    |      |             |        |    |      |             |        |    |      |             |        |    |      |             |        |    |     |             |        |    |     |             |        |    |     |             |        |    |     |             |        |    |     |             |        |    |     |             |        |    |     |             |        |    |     |             |        |
| 15                            | 900               | C-O stretch                                                                                                                                                                                                                                                                                                                                                                                                                                                                                                                                                                                                                                                                                                                                                                                                                                                                                                                                                                                                                                                                                                                                                                                                                                                                                                                                                                                                                                                                                                                                                                                                                                                                    | Ethers             |                   |            |              |   |      |             |       |   |      |             |         |   |      |             |                    |   |      |              |                    |   |      |             |         |   |      |             |        |   |      |             |         |   |      |             |        |   |      |             |        |    |      |             |        |    |      |             |        |    |      |             |        |    |      |             |        |    |     |             |        |    |     |             |        |    |     |             |        |    |     |             |        |    |     |             |        |    |     |             |        |    |     |             |        |    |     |             |        |
| 16                            | 850               | C-O stretch                                                                                                                                                                                                                                                                                                                                                                                                                                                                                                                                                                                                                                                                                                                                                                                                                                                                                                                                                                                                                                                                                                                                                                                                                                                                                                                                                                                                                                                                                                                                                                                                                                                                    | Ethers             |                   |            |              |   |      |             |       |   |      |             |         |   |      |             |                    |   |      |              |                    |   |      |             |         |   |      |             |        |   |      |             |         |   |      |             |        |   |      |             |        |    |      |             |        |    |      |             |        |    |      |             |        |    |      |             |        |    |     |             |        |    |     |             |        |    |     |             |        |    |     |             |        |    |     |             |        |    |     |             |        |    |     |             |        |    |     |             |        |
| 17                            | 800               | C-O stretch                                                                                                                                                                                                                                                                                                                                                                                                                                                                                                                                                                                                                                                                                                                                                                                                                                                                                                                                                                                                                                                                                                                                                                                                                                                                                                                                                                                                                                                                                                                                                                                                                                                                    | Ethers             |                   |            |              |   |      |             |       |   |      |             |         |   |      |             |                    |   |      |              |                    |   |      |             |         |   |      |             |        |   |      |             |         |   |      |             |        |   |      |             |        |    |      |             |        |    |      |             |        |    |      |             |        |    |      |             |        |    |     |             |        |    |     |             |        |    |     |             |        |    |     |             |        |    |     |             |        |    |     |             |        |    |     |             |        |    |     |             |        |
| 18                            | 750               | C-O stretch                                                                                                                                                                                                                                                                                                                                                                                                                                                                                                                                                                                                                                                                                                                                                                                                                                                                                                                                                                                                                                                                                                                                                                                                                                                                                                                                                                                                                                                                                                                                                                                                                                                                    | Ethers             |                   |            |              |   |      |             |       |   |      |             |         |   |      |             |                    |   |      |              |                    |   |      |             |         |   |      |             |        |   |      |             |         |   |      |             |        |   |      |             |        |    |      |             |        |    |      |             |        |    |      |             |        |    |      |             |        |    |     |             |        |    |     |             |        |    |     |             |        |    |     |             |        |    |     |             |        |    |     |             |        |    |     |             |        |    |     |             |        |
| 19                            | 700               | C-O stretch                                                                                                                                                                                                                                                                                                                                                                                                                                                                                                                                                                                                                                                                                                                                                                                                                                                                                                                                                                                                                                                                                                                                                                                                                                                                                                                                                                                                                                                                                                                                                                                                                                                                    | Ethers             |                   |            |              |   |      |             |       |   |      |             |         |   |      |             |                    |   |      |              |                    |   |      |             |         |   |      |             |        |   |      |             |         |   |      |             |        |   |      |             |        |    |      |             |        |    |      |             |        |    |      |             |        |    |      |             |        |    |     |             |        |    |     |             |        |    |     |             |        |    |     |             |        |    |     |             |        |    |     |             |        |    |     |             |        |    |     |             |        |
| 20                            | 650               | C-O stretch                                                                                                                                                                                                                                                                                                                                                                                                                                                                                                                                                                                                                                                                                                                                                                                                                                                                                                                                                                                                                                                                                                                                                                                                                                                                                                                                                                                                                                                                                                                                                                                                                                                                    | Ethers             |                   |            |              |   |      |             |       |   |      |             |         |   |      |             |                    |   |      |              |                    |   |      |             |         |   |      |             |        |   |      |             |         |   |      |             |        |   |      |             |        |    |      |             |        |    |      |             |        |    |      |             |        |    |      |             |        |    |     |             |        |    |     |             |        |    |     |             |        |    |     |             |        |    |     |             |        |    |     |             |        |    |     |             |        |    |     |             |        |
| 21                            | 600               | C-O stretch                                                                                                                                                                                                                                                                                                                                                                                                                                                                                                                                                                                                                                                                                                                                                                                                                                                                                                                                                                                                                                                                                                                                                                                                                                                                                                                                                                                                                                                                                                                                                                                                                                                                    | Ethers             |                   |            |              |   |      |             |       |   |      |             |         |   |      |             |                    |   |      |              |                    |   |      |             |         |   |      |             |        |   |      |             |         |   |      |             |        |   |      |             |        |    |      |             |        |    |      |             |        |    |      |             |        |    |      |             |        |    |     |             |        |    |     |             |        |    |     |             |        |    |     |             |        |    |     |             |        |    |     |             |        |    |     |             |        |    |     |             |        |
| <p>CABS-NW-<br/>Shallow-3</p> |                   | <table border="1"> <thead> <tr> <th>Peak</th> <th>Wavenumber (cm⁻¹)</th> <th>Assignment</th> <th>Library Name</th> </tr> </thead> <tbody> <tr><td>1</td><td>3400</td><td>O-H stretch</td><td>Water</td></tr> <tr><td>2</td><td>2900</td><td>C-H stretch</td><td>Alkanes</td></tr> <tr><td>3</td><td>1700</td><td>C=O stretch</td><td>Carbonyl Compounds</td></tr> <tr><td>4</td><td>1600</td><td>Aromatic C=C</td><td>Aromatic Compounds</td></tr> <tr><td>5</td><td>1500</td><td>C=C stretch</td><td>Alkenes</td></tr> <tr><td>6</td><td>1450</td><td>C-O stretch</td><td>Ethers</td></tr> <tr><td>7</td><td>1400</td><td>C=C stretch</td><td>Alkenes</td></tr> <tr><td>8</td><td>1380</td><td>C-O stretch</td><td>Ethers</td></tr> <tr><td>9</td><td>1300</td><td>C-O stretch</td><td>Ethers</td></tr> <tr><td>10</td><td>1250</td><td>C-O stretch</td><td>Ethers</td></tr> <tr><td>11</td><td>1100</td><td>C-O stretch</td><td>Ethers</td></tr> <tr><td>12</td><td>1050</td><td>C-O stretch</td><td>Ethers</td></tr> <tr><td>13</td><td>1000</td><td>C-O stretch</td><td>Ethers</td></tr> <tr><td>14</td><td>950</td><td>C-O stretch</td><td>Ethers</td></tr> <tr><td>15</td><td>900</td><td>C-O stretch</td><td>Ethers</td></tr> <tr><td>16</td><td>850</td><td>C-O stretch</td><td>Ethers</td></tr> <tr><td>17</td><td>800</td><td>C-O stretch</td><td>Ethers</td></tr> <tr><td>18</td><td>750</td><td>C-O stretch</td><td>Ethers</td></tr> <tr><td>19</td><td>700</td><td>C-O stretch</td><td>Ethers</td></tr> <tr><td>20</td><td>650</td><td>C-O stretch</td><td>Ethers</td></tr> <tr><td>21</td><td>600</td><td>C-O stretch</td><td>Ethers</td></tr> </tbody> </table> | Peak               | Wavenumber (cm⁻¹) | Assignment | Library Name | 1 | 3400 | O-H stretch | Water | 2 | 2900 | C-H stretch | Alkanes | 3 | 1700 | C=O stretch | Carbonyl Compounds | 4 | 1600 | Aromatic C=C | Aromatic Compounds | 5 | 1500 | C=C stretch | Alkenes | 6 | 1450 | C-O stretch | Ethers | 7 | 1400 | C=C stretch | Alkenes | 8 | 1380 | C-O stretch | Ethers | 9 | 1300 | C-O stretch | Ethers | 10 | 1250 | C-O stretch | Ethers | 11 | 1100 | C-O stretch | Ethers | 12 | 1050 | C-O stretch | Ethers | 13 | 1000 | C-O stretch | Ethers | 14 | 950 | C-O stretch | Ethers | 15 | 900 | C-O stretch | Ethers | 16 | 850 | C-O stretch | Ethers | 17 | 800 | C-O stretch | Ethers | 18 | 750 | C-O stretch | Ethers | 19 | 700 | C-O stretch | Ethers | 20 | 650 | C-O stretch | Ethers | 21 | 600 | C-O stretch | Ethers |
| Peak                          | Wavenumber (cm⁻¹) | Assignment                                                                                                                                                                                                                                                                                                                                                                                                                                                                                                                                                                                                                                                                                                                                                                                                                                                                                                                                                                                                                                                                                                                                                                                                                                                                                                                                                                                                                                                                                                                                                                                                                                                                     | Library Name       |                   |            |              |   |      |             |       |   |      |             |         |   |      |             |                    |   |      |              |                    |   |      |             |         |   |      |             |        |   |      |             |         |   |      |             |        |   |      |             |        |    |      |             |        |    |      |             |        |    |      |             |        |    |      |             |        |    |     |             |        |    |     |             |        |    |     |             |        |    |     |             |        |    |     |             |        |    |     |             |        |    |     |             |        |    |     |             |        |
| 1                             | 3400              | O-H stretch                                                                                                                                                                                                                                                                                                                                                                                                                                                                                                                                                                                                                                                                                                                                                                                                                                                                                                                                                                                                                                                                                                                                                                                                                                                                                                                                                                                                                                                                                                                                                                                                                                                                    | Water              |                   |            |              |   |      |             |       |   |      |             |         |   |      |             |                    |   |      |              |                    |   |      |             |         |   |      |             |        |   |      |             |         |   |      |             |        |   |      |             |        |    |      |             |        |    |      |             |        |    |      |             |        |    |      |             |        |    |     |             |        |    |     |             |        |    |     |             |        |    |     |             |        |    |     |             |        |    |     |             |        |    |     |             |        |    |     |             |        |
| 2                             | 2900              | C-H stretch                                                                                                                                                                                                                                                                                                                                                                                                                                                                                                                                                                                                                                                                                                                                                                                                                                                                                                                                                                                                                                                                                                                                                                                                                                                                                                                                                                                                                                                                                                                                                                                                                                                                    | Alkanes            |                   |            |              |   |      |             |       |   |      |             |         |   |      |             |                    |   |      |              |                    |   |      |             |         |   |      |             |        |   |      |             |         |   |      |             |        |   |      |             |        |    |      |             |        |    |      |             |        |    |      |             |        |    |      |             |        |    |     |             |        |    |     |             |        |    |     |             |        |    |     |             |        |    |     |             |        |    |     |             |        |    |     |             |        |    |     |             |        |
| 3                             | 1700              | C=O stretch                                                                                                                                                                                                                                                                                                                                                                                                                                                                                                                                                                                                                                                                                                                                                                                                                                                                                                                                                                                                                                                                                                                                                                                                                                                                                                                                                                                                                                                                                                                                                                                                                                                                    | Carbonyl Compounds |                   |            |              |   |      |             |       |   |      |             |         |   |      |             |                    |   |      |              |                    |   |      |             |         |   |      |             |        |   |      |             |         |   |      |             |        |   |      |             |        |    |      |             |        |    |      |             |        |    |      |             |        |    |      |             |        |    |     |             |        |    |     |             |        |    |     |             |        |    |     |             |        |    |     |             |        |    |     |             |        |    |     |             |        |    |     |             |        |
| 4                             | 1600              | Aromatic C=C                                                                                                                                                                                                                                                                                                                                                                                                                                                                                                                                                                                                                                                                                                                                                                                                                                                                                                                                                                                                                                                                                                                                                                                                                                                                                                                                                                                                                                                                                                                                                                                                                                                                   | Aromatic Compounds |                   |            |              |   |      |             |       |   |      |             |         |   |      |             |                    |   |      |              |                    |   |      |             |         |   |      |             |        |   |      |             |         |   |      |             |        |   |      |             |        |    |      |             |        |    |      |             |        |    |      |             |        |    |      |             |        |    |     |             |        |    |     |             |        |    |     |             |        |    |     |             |        |    |     |             |        |    |     |             |        |    |     |             |        |    |     |             |        |
| 5                             | 1500              | C=C stretch                                                                                                                                                                                                                                                                                                                                                                                                                                                                                                                                                                                                                                                                                                                                                                                                                                                                                                                                                                                                                                                                                                                                                                                                                                                                                                                                                                                                                                                                                                                                                                                                                                                                    | Alkenes            |                   |            |              |   |      |             |       |   |      |             |         |   |      |             |                    |   |      |              |                    |   |      |             |         |   |      |             |        |   |      |             |         |   |      |             |        |   |      |             |        |    |      |             |        |    |      |             |        |    |      |             |        |    |      |             |        |    |     |             |        |    |     |             |        |    |     |             |        |    |     |             |        |    |     |             |        |    |     |             |        |    |     |             |        |    |     |             |        |
| 6                             | 1450              | C-O stretch                                                                                                                                                                                                                                                                                                                                                                                                                                                                                                                                                                                                                                                                                                                                                                                                                                                                                                                                                                                                                                                                                                                                                                                                                                                                                                                                                                                                                                                                                                                                                                                                                                                                    | Ethers             |                   |            |              |   |      |             |       |   |      |             |         |   |      |             |                    |   |      |              |                    |   |      |             |         |   |      |             |        |   |      |             |         |   |      |             |        |   |      |             |        |    |      |             |        |    |      |             |        |    |      |             |        |    |      |             |        |    |     |             |        |    |     |             |        |    |     |             |        |    |     |             |        |    |     |             |        |    |     |             |        |    |     |             |        |    |     |             |        |
| 7                             | 1400              | C=C stretch                                                                                                                                                                                                                                                                                                                                                                                                                                                                                                                                                                                                                                                                                                                                                                                                                                                                                                                                                                                                                                                                                                                                                                                                                                                                                                                                                                                                                                                                                                                                                                                                                                                                    | Alkenes            |                   |            |              |   |      |             |       |   |      |             |         |   |      |             |                    |   |      |              |                    |   |      |             |         |   |      |             |        |   |      |             |         |   |      |             |        |   |      |             |        |    |      |             |        |    |      |             |        |    |      |             |        |    |      |             |        |    |     |             |        |    |     |             |        |    |     |             |        |    |     |             |        |    |     |             |        |    |     |             |        |    |     |             |        |    |     |             |        |
| 8                             | 1380              | C-O stretch                                                                                                                                                                                                                                                                                                                                                                                                                                                                                                                                                                                                                                                                                                                                                                                                                                                                                                                                                                                                                                                                                                                                                                                                                                                                                                                                                                                                                                                                                                                                                                                                                                                                    | Ethers             |                   |            |              |   |      |             |       |   |      |             |         |   |      |             |                    |   |      |              |                    |   |      |             |         |   |      |             |        |   |      |             |         |   |      |             |        |   |      |             |        |    |      |             |        |    |      |             |        |    |      |             |        |    |      |             |        |    |     |             |        |    |     |             |        |    |     |             |        |    |     |             |        |    |     |             |        |    |     |             |        |    |     |             |        |    |     |             |        |
| 9                             | 1300              | C-O stretch                                                                                                                                                                                                                                                                                                                                                                                                                                                                                                                                                                                                                                                                                                                                                                                                                                                                                                                                                                                                                                                                                                                                                                                                                                                                                                                                                                                                                                                                                                                                                                                                                                                                    | Ethers             |                   |            |              |   |      |             |       |   |      |             |         |   |      |             |                    |   |      |              |                    |   |      |             |         |   |      |             |        |   |      |             |         |   |      |             |        |   |      |             |        |    |      |             |        |    |      |             |        |    |      |             |        |    |      |             |        |    |     |             |        |    |     |             |        |    |     |             |        |    |     |             |        |    |     |             |        |    |     |             |        |    |     |             |        |    |     |             |        |
| 10                            | 1250              | C-O stretch                                                                                                                                                                                                                                                                                                                                                                                                                                                                                                                                                                                                                                                                                                                                                                                                                                                                                                                                                                                                                                                                                                                                                                                                                                                                                                                                                                                                                                                                                                                                                                                                                                                                    | Ethers             |                   |            |              |   |      |             |       |   |      |             |         |   |      |             |                    |   |      |              |                    |   |      |             |         |   |      |             |        |   |      |             |         |   |      |             |        |   |      |             |        |    |      |             |        |    |      |             |        |    |      |             |        |    |      |             |        |    |     |             |        |    |     |             |        |    |     |             |        |    |     |             |        |    |     |             |        |    |     |             |        |    |     |             |        |    |     |             |        |
| 11                            | 1100              | C-O stretch                                                                                                                                                                                                                                                                                                                                                                                                                                                                                                                                                                                                                                                                                                                                                                                                                                                                                                                                                                                                                                                                                                                                                                                                                                                                                                                                                                                                                                                                                                                                                                                                                                                                    | Ethers             |                   |            |              |   |      |             |       |   |      |             |         |   |      |             |                    |   |      |              |                    |   |      |             |         |   |      |             |        |   |      |             |         |   |      |             |        |   |      |             |        |    |      |             |        |    |      |             |        |    |      |             |        |    |      |             |        |    |     |             |        |    |     |             |        |    |     |             |        |    |     |             |        |    |     |             |        |    |     |             |        |    |     |             |        |    |     |             |        |
| 12                            | 1050              | C-O stretch                                                                                                                                                                                                                                                                                                                                                                                                                                                                                                                                                                                                                                                                                                                                                                                                                                                                                                                                                                                                                                                                                                                                                                                                                                                                                                                                                                                                                                                                                                                                                                                                                                                                    | Ethers             |                   |            |              |   |      |             |       |   |      |             |         |   |      |             |                    |   |      |              |                    |   |      |             |         |   |      |             |        |   |      |             |         |   |      |             |        |   |      |             |        |    |      |             |        |    |      |             |        |    |      |             |        |    |      |             |        |    |     |             |        |    |     |             |        |    |     |             |        |    |     |             |        |    |     |             |        |    |     |             |        |    |     |             |        |    |     |             |        |
| 13                            | 1000              | C-O stretch                                                                                                                                                                                                                                                                                                                                                                                                                                                                                                                                                                                                                                                                                                                                                                                                                                                                                                                                                                                                                                                                                                                                                                                                                                                                                                                                                                                                                                                                                                                                                                                                                                                                    | Ethers             |                   |            |              |   |      |             |       |   |      |             |         |   |      |             |                    |   |      |              |                    |   |      |             |         |   |      |             |        |   |      |             |         |   |      |             |        |   |      |             |        |    |      |             |        |    |      |             |        |    |      |             |        |    |      |             |        |    |     |             |        |    |     |             |        |    |     |             |        |    |     |             |        |    |     |             |        |    |     |             |        |    |     |             |        |    |     |             |        |
| 14                            | 950               | C-O stretch                                                                                                                                                                                                                                                                                                                                                                                                                                                                                                                                                                                                                                                                                                                                                                                                                                                                                                                                                                                                                                                                                                                                                                                                                                                                                                                                                                                                                                                                                                                                                                                                                                                                    | Ethers             |                   |            |              |   |      |             |       |   |      |             |         |   |      |             |                    |   |      |              |                    |   |      |             |         |   |      |             |        |   |      |             |         |   |      |             |        |   |      |             |        |    |      |             |        |    |      |             |        |    |      |             |        |    |      |             |        |    |     |             |        |    |     |             |        |    |     |             |        |    |     |             |        |    |     |             |        |    |     |             |        |    |     |             |        |    |     |             |        |
| 15                            | 900               | C-O stretch                                                                                                                                                                                                                                                                                                                                                                                                                                                                                                                                                                                                                                                                                                                                                                                                                                                                                                                                                                                                                                                                                                                                                                                                                                                                                                                                                                                                                                                                                                                                                                                                                                                                    | Ethers             |                   |            |              |   |      |             |       |   |      |             |         |   |      |             |                    |   |      |              |                    |   |      |             |         |   |      |             |        |   |      |             |         |   |      |             |        |   |      |             |        |    |      |             |        |    |      |             |        |    |      |             |        |    |      |             |        |    |     |             |        |    |     |             |        |    |     |             |        |    |     |             |        |    |     |             |        |    |     |             |        |    |     |             |        |    |     |             |        |
| 16                            | 850               | C-O stretch                                                                                                                                                                                                                                                                                                                                                                                                                                                                                                                                                                                                                                                                                                                                                                                                                                                                                                                                                                                                                                                                                                                                                                                                                                                                                                                                                                                                                                                                                                                                                                                                                                                                    | Ethers             |                   |            |              |   |      |             |       |   |      |             |         |   |      |             |                    |   |      |              |                    |   |      |             |         |   |      |             |        |   |      |             |         |   |      |             |        |   |      |             |        |    |      |             |        |    |      |             |        |    |      |             |        |    |      |             |        |    |     |             |        |    |     |             |        |    |     |             |        |    |     |             |        |    |     |             |        |    |     |             |        |    |     |             |        |    |     |             |        |
| 17                            | 800               | C-O stretch                                                                                                                                                                                                                                                                                                                                                                                                                                                                                                                                                                                                                                                                                                                                                                                                                                                                                                                                                                                                                                                                                                                                                                                                                                                                                                                                                                                                                                                                                                                                                                                                                                                                    | Ethers             |                   |            |              |   |      |             |       |   |      |             |         |   |      |             |                    |   |      |              |                    |   |      |             |         |   |      |             |        |   |      |             |         |   |      |             |        |   |      |             |        |    |      |             |        |    |      |             |        |    |      |             |        |    |      |             |        |    |     |             |        |    |     |             |        |    |     |             |        |    |     |             |        |    |     |             |        |    |     |             |        |    |     |             |        |    |     |             |        |
| 18                            | 750               | C-O stretch                                                                                                                                                                                                                                                                                                                                                                                                                                                                                                                                                                                                                                                                                                                                                                                                                                                                                                                                                                                                                                                                                                                                                                                                                                                                                                                                                                                                                                                                                                                                                                                                                                                                    | Ethers             |                   |            |              |   |      |             |       |   |      |             |         |   |      |             |                    |   |      |              |                    |   |      |             |         |   |      |             |        |   |      |             |         |   |      |             |        |   |      |             |        |    |      |             |        |    |      |             |        |    |      |             |        |    |      |             |        |    |     |             |        |    |     |             |        |    |     |             |        |    |     |             |        |    |     |             |        |    |     |             |        |    |     |             |        |    |     |             |        |
| 19                            | 700               | C-O stretch                                                                                                                                                                                                                                                                                                                                                                                                                                                                                                                                                                                                                                                                                                                                                                                                                                                                                                                                                                                                                                                                                                                                                                                                                                                                                                                                                                                                                                                                                                                                                                                                                                                                    | Ethers             |                   |            |              |   |      |             |       |   |      |             |         |   |      |             |                    |   |      |              |                    |   |      |             |         |   |      |             |        |   |      |             |         |   |      |             |        |   |      |             |        |    |      |             |        |    |      |             |        |    |      |             |        |    |      |             |        |    |     |             |        |    |     |             |        |    |     |             |        |    |     |             |        |    |     |             |        |    |     |             |        |    |     |             |        |    |     |             |        |
| 20                            | 650               | C-O stretch                                                                                                                                                                                                                                                                                                                                                                                                                                                                                                                                                                                                                                                                                                                                                                                                                                                                                                                                                                                                                                                                                                                                                                                                                                                                                                                                                                                                                                                                                                                                                                                                                                                                    | Ethers             |                   |            |              |   |      |             |       |   |      |             |         |   |      |             |                    |   |      |              |                    |   |      |             |         |   |      |             |        |   |      |             |         |   |      |             |        |   |      |             |        |    |      |             |        |    |      |             |        |    |      |             |        |    |      |             |        |    |     |             |        |    |     |             |        |    |     |             |        |    |     |             |        |    |     |             |        |    |     |             |        |    |     |             |        |    |     |             |        |
| 21                            | 600               | C-O stretch                                                                                                                                                                                                                                                                                                                                                                                                                                                                                                                                                                                                                                                                                                                                                                                                                                                                                                                                                                                                                                                                                                                                                                                                                                                                                                                                                                                                                                                                                                                                                                                                                                                                    | Ethers             |                   |            |              |   |      |             |       |   |      |             |         |   |      |             |                    |   |      |              |                    |   |      |             |         |   |      |             |        |   |      |             |         |   |      |             |        |   |      |             |        |    |      |             |        |    |      |             |        |    |      |             |        |    |      |             |        |    |     |             |        |    |     |             |        |    |     |             |        |    |     |             |        |    |     |             |        |    |     |             |        |    |     |             |        |    |     |             |        |
| <p>CABS-NW-<br/>Shallow-4</p> |                   | <table border="1"> <thead> <tr> <th>Peak</th> <th>Wavenumber (cm⁻¹)</th> <th>Assignment</th> <th>Library Name</th> </tr> </thead> <tbody> <tr><td>1</td><td>3400</td><td>O-H stretch</td><td>Water</td></tr> <tr><td>2</td><td>2900</td><td>C-H stretch</td><td>Alkanes</td></tr> <tr><td>3</td><td>1700</td><td>C=O stretch</td><td>Carbonyl Compounds</td></tr> <tr><td>4</td><td>1600</td><td>Aromatic C=C</td><td>Aromatic Compounds</td></tr> <tr><td>5</td><td>1500</td><td>C=C stretch</td><td>Alkenes</td></tr> <tr><td>6</td><td>1450</td><td>C-O stretch</td><td>Ethers</td></tr> <tr><td>7</td><td>1400</td><td>C=C stretch</td><td>Alkenes</td></tr> <tr><td>8</td><td>1380</td><td>C-O stretch</td><td>Ethers</td></tr> <tr><td>9</td><td>1300</td><td>C-O stretch</td><td>Ethers</td></tr> <tr><td>10</td><td>1250</td><td>C-O stretch</td><td>Ethers</td></tr> <tr><td>11</td><td>1100</td><td>C-O stretch</td><td>Ethers</td></tr> <tr><td>12</td><td>1050</td><td>C-O stretch</td><td>Ethers</td></tr> <tr><td>13</td><td>1000</td><td>C-O stretch</td><td>Ethers</td></tr> <tr><td>14</td><td>950</td><td>C-O stretch</td><td>Ethers</td></tr> <tr><td>15</td><td>900</td><td>C-O stretch</td><td>Ethers</td></tr> <tr><td>16</td><td>850</td><td>C-O stretch</td><td>Ethers</td></tr> <tr><td>17</td><td>800</td><td>C-O stretch</td><td>Ethers</td></tr> <tr><td>18</td><td>750</td><td>C-O stretch</td><td>Ethers</td></tr> <tr><td>19</td><td>700</td><td>C-O stretch</td><td>Ethers</td></tr> <tr><td>20</td><td>650</td><td>C-O stretch</td><td>Ethers</td></tr> <tr><td>21</td><td>600</td><td>C-O stretch</td><td>Ethers</td></tr> </tbody> </table> | Peak               | Wavenumber (cm⁻¹) | Assignment | Library Name | 1 | 3400 | O-H stretch | Water | 2 | 2900 | C-H stretch | Alkanes | 3 | 1700 | C=O stretch | Carbonyl Compounds | 4 | 1600 | Aromatic C=C | Aromatic Compounds | 5 | 1500 | C=C stretch | Alkenes | 6 | 1450 | C-O stretch | Ethers | 7 | 1400 | C=C stretch | Alkenes | 8 | 1380 | C-O stretch | Ethers | 9 | 1300 | C-O stretch | Ethers | 10 | 1250 | C-O stretch | Ethers | 11 | 1100 | C-O stretch | Ethers | 12 | 1050 | C-O stretch | Ethers | 13 | 1000 | C-O stretch | Ethers | 14 | 950 | C-O stretch | Ethers | 15 | 900 | C-O stretch | Ethers | 16 | 850 | C-O stretch | Ethers | 17 | 800 | C-O stretch | Ethers | 18 | 750 | C-O stretch | Ethers | 19 | 700 | C-O stretch | Ethers | 20 | 650 | C-O stretch | Ethers | 21 | 600 | C-O stretch | Ethers |
| Peak                          | Wavenumber (cm⁻¹) | Assignment                                                                                                                                                                                                                                                                                                                                                                                                                                                                                                                                                                                                                                                                                                                                                                                                                                                                                                                                                                                                                                                                                                                                                                                                                                                                                                                                                                                                                                                                                                                                                                                                                                                                     | Library Name       |                   |            |              |   |      |             |       |   |      |             |         |   |      |             |                    |   |      |              |                    |   |      |             |         |   |      |             |        |   |      |             |         |   |      |             |        |   |      |             |        |    |      |             |        |    |      |             |        |    |      |             |        |    |      |             |        |    |     |             |        |    |     |             |        |    |     |             |        |    |     |             |        |    |     |             |        |    |     |             |        |    |     |             |        |    |     |             |        |
| 1                             | 3400              | O-H stretch                                                                                                                                                                                                                                                                                                                                                                                                                                                                                                                                                                                                                                                                                                                                                                                                                                                                                                                                                                                                                                                                                                                                                                                                                                                                                                                                                                                                                                                                                                                                                                                                                                                                    | Water              |                   |            |              |   |      |             |       |   |      |             |         |   |      |             |                    |   |      |              |                    |   |      |             |         |   |      |             |        |   |      |             |         |   |      |             |        |   |      |             |        |    |      |             |        |    |      |             |        |    |      |             |        |    |      |             |        |    |     |             |        |    |     |             |        |    |     |             |        |    |     |             |        |    |     |             |        |    |     |             |        |    |     |             |        |    |     |             |        |
| 2                             | 2900              | C-H stretch                                                                                                                                                                                                                                                                                                                                                                                                                                                                                                                                                                                                                                                                                                                                                                                                                                                                                                                                                                                                                                                                                                                                                                                                                                                                                                                                                                                                                                                                                                                                                                                                                                                                    | Alkanes            |                   |            |              |   |      |             |       |   |      |             |         |   |      |             |                    |   |      |              |                    |   |      |             |         |   |      |             |        |   |      |             |         |   |      |             |        |   |      |             |        |    |      |             |        |    |      |             |        |    |      |             |        |    |      |             |        |    |     |             |        |    |     |             |        |    |     |             |        |    |     |             |        |    |     |             |        |    |     |             |        |    |     |             |        |    |     |             |        |
| 3                             | 1700              | C=O stretch                                                                                                                                                                                                                                                                                                                                                                                                                                                                                                                                                                                                                                                                                                                                                                                                                                                                                                                                                                                                                                                                                                                                                                                                                                                                                                                                                                                                                                                                                                                                                                                                                                                                    | Carbonyl Compounds |                   |            |              |   |      |             |       |   |      |             |         |   |      |             |                    |   |      |              |                    |   |      |             |         |   |      |             |        |   |      |             |         |   |      |             |        |   |      |             |        |    |      |             |        |    |      |             |        |    |      |             |        |    |      |             |        |    |     |             |        |    |     |             |        |    |     |             |        |    |     |             |        |    |     |             |        |    |     |             |        |    |     |             |        |    |     |             |        |
| 4                             | 1600              | Aromatic C=C                                                                                                                                                                                                                                                                                                                                                                                                                                                                                                                                                                                                                                                                                                                                                                                                                                                                                                                                                                                                                                                                                                                                                                                                                                                                                                                                                                                                                                                                                                                                                                                                                                                                   | Aromatic Compounds |                   |            |              |   |      |             |       |   |      |             |         |   |      |             |                    |   |      |              |                    |   |      |             |         |   |      |             |        |   |      |             |         |   |      |             |        |   |      |             |        |    |      |             |        |    |      |             |        |    |      |             |        |    |      |             |        |    |     |             |        |    |     |             |        |    |     |             |        |    |     |             |        |    |     |             |        |    |     |             |        |    |     |             |        |    |     |             |        |
| 5                             | 1500              | C=C stretch                                                                                                                                                                                                                                                                                                                                                                                                                                                                                                                                                                                                                                                                                                                                                                                                                                                                                                                                                                                                                                                                                                                                                                                                                                                                                                                                                                                                                                                                                                                                                                                                                                                                    | Alkenes            |                   |            |              |   |      |             |       |   |      |             |         |   |      |             |                    |   |      |              |                    |   |      |             |         |   |      |             |        |   |      |             |         |   |      |             |        |   |      |             |        |    |      |             |        |    |      |             |        |    |      |             |        |    |      |             |        |    |     |             |        |    |     |             |        |    |     |             |        |    |     |             |        |    |     |             |        |    |     |             |        |    |     |             |        |    |     |             |        |
| 6                             | 1450              | C-O stretch                                                                                                                                                                                                                                                                                                                                                                                                                                                                                                                                                                                                                                                                                                                                                                                                                                                                                                                                                                                                                                                                                                                                                                                                                                                                                                                                                                                                                                                                                                                                                                                                                                                                    | Ethers             |                   |            |              |   |      |             |       |   |      |             |         |   |      |             |                    |   |      |              |                    |   |      |             |         |   |      |             |        |   |      |             |         |   |      |             |        |   |      |             |        |    |      |             |        |    |      |             |        |    |      |             |        |    |      |             |        |    |     |             |        |    |     |             |        |    |     |             |        |    |     |             |        |    |     |             |        |    |     |             |        |    |     |             |        |    |     |             |        |
| 7                             | 1400              | C=C stretch                                                                                                                                                                                                                                                                                                                                                                                                                                                                                                                                                                                                                                                                                                                                                                                                                                                                                                                                                                                                                                                                                                                                                                                                                                                                                                                                                                                                                                                                                                                                                                                                                                                                    | Alkenes            |                   |            |              |   |      |             |       |   |      |             |         |   |      |             |                    |   |      |              |                    |   |      |             |         |   |      |             |        |   |      |             |         |   |      |             |        |   |      |             |        |    |      |             |        |    |      |             |        |    |      |             |        |    |      |             |        |    |     |             |        |    |     |             |        |    |     |             |        |    |     |             |        |    |     |             |        |    |     |             |        |    |     |             |        |    |     |             |        |
| 8                             | 1380              | C-O stretch                                                                                                                                                                                                                                                                                                                                                                                                                                                                                                                                                                                                                                                                                                                                                                                                                                                                                                                                                                                                                                                                                                                                                                                                                                                                                                                                                                                                                                                                                                                                                                                                                                                                    | Ethers             |                   |            |              |   |      |             |       |   |      |             |         |   |      |             |                    |   |      |              |                    |   |      |             |         |   |      |             |        |   |      |             |         |   |      |             |        |   |      |             |        |    |      |             |        |    |      |             |        |    |      |             |        |    |      |             |        |    |     |             |        |    |     |             |        |    |     |             |        |    |     |             |        |    |     |             |        |    |     |             |        |    |     |             |        |    |     |             |        |
| 9                             | 1300              | C-O stretch                                                                                                                                                                                                                                                                                                                                                                                                                                                                                                                                                                                                                                                                                                                                                                                                                                                                                                                                                                                                                                                                                                                                                                                                                                                                                                                                                                                                                                                                                                                                                                                                                                                                    | Ethers             |                   |            |              |   |      |             |       |   |      |             |         |   |      |             |                    |   |      |              |                    |   |      |             |         |   |      |             |        |   |      |             |         |   |      |             |        |   |      |             |        |    |      |             |        |    |      |             |        |    |      |             |        |    |      |             |        |    |     |             |        |    |     |             |        |    |     |             |        |    |     |             |        |    |     |             |        |    |     |             |        |    |     |             |        |    |     |             |        |
| 10                            | 1250              | C-O stretch                                                                                                                                                                                                                                                                                                                                                                                                                                                                                                                                                                                                                                                                                                                                                                                                                                                                                                                                                                                                                                                                                                                                                                                                                                                                                                                                                                                                                                                                                                                                                                                                                                                                    | Ethers             |                   |            |              |   |      |             |       |   |      |             |         |   |      |             |                    |   |      |              |                    |   |      |             |         |   |      |             |        |   |      |             |         |   |      |             |        |   |      |             |        |    |      |             |        |    |      |             |        |    |      |             |        |    |      |             |        |    |     |             |        |    |     |             |        |    |     |             |        |    |     |             |        |    |     |             |        |    |     |             |        |    |     |             |        |    |     |             |        |
| 11                            | 1100              | C-O stretch                                                                                                                                                                                                                                                                                                                                                                                                                                                                                                                                                                                                                                                                                                                                                                                                                                                                                                                                                                                                                                                                                                                                                                                                                                                                                                                                                                                                                                                                                                                                                                                                                                                                    | Ethers             |                   |            |              |   |      |             |       |   |      |             |         |   |      |             |                    |   |      |              |                    |   |      |             |         |   |      |             |        |   |      |             |         |   |      |             |        |   |      |             |        |    |      |             |        |    |      |             |        |    |      |             |        |    |      |             |        |    |     |             |        |    |     |             |        |    |     |             |        |    |     |             |        |    |     |             |        |    |     |             |        |    |     |             |        |    |     |             |        |
| 12                            | 1050              | C-O stretch                                                                                                                                                                                                                                                                                                                                                                                                                                                                                                                                                                                                                                                                                                                                                                                                                                                                                                                                                                                                                                                                                                                                                                                                                                                                                                                                                                                                                                                                                                                                                                                                                                                                    | Ethers             |                   |            |              |   |      |             |       |   |      |             |         |   |      |             |                    |   |      |              |                    |   |      |             |         |   |      |             |        |   |      |             |         |   |      |             |        |   |      |             |        |    |      |             |        |    |      |             |        |    |      |             |        |    |      |             |        |    |     |             |        |    |     |             |        |    |     |             |        |    |     |             |        |    |     |             |        |    |     |             |        |    |     |             |        |    |     |             |        |
| 13                            | 1000              | C-O stretch                                                                                                                                                                                                                                                                                                                                                                                                                                                                                                                                                                                                                                                                                                                                                                                                                                                                                                                                                                                                                                                                                                                                                                                                                                                                                                                                                                                                                                                                                                                                                                                                                                                                    | Ethers             |                   |            |              |   |      |             |       |   |      |             |         |   |      |             |                    |   |      |              |                    |   |      |             |         |   |      |             |        |   |      |             |         |   |      |             |        |   |      |             |        |    |      |             |        |    |      |             |        |    |      |             |        |    |      |             |        |    |     |             |        |    |     |             |        |    |     |             |        |    |     |             |        |    |     |             |        |    |     |             |        |    |     |             |        |    |     |             |        |
| 14                            | 950               | C-O stretch                                                                                                                                                                                                                                                                                                                                                                                                                                                                                                                                                                                                                                                                                                                                                                                                                                                                                                                                                                                                                                                                                                                                                                                                                                                                                                                                                                                                                                                                                                                                                                                                                                                                    | Ethers             |                   |            |              |   |      |             |       |   |      |             |         |   |      |             |                    |   |      |              |                    |   |      |             |         |   |      |             |        |   |      |             |         |   |      |             |        |   |      |             |        |    |      |             |        |    |      |             |        |    |      |             |        |    |      |             |        |    |     |             |        |    |     |             |        |    |     |             |        |    |     |             |        |    |     |             |        |    |     |             |        |    |     |             |        |    |     |             |        |
| 15                            | 900               | C-O stretch                                                                                                                                                                                                                                                                                                                                                                                                                                                                                                                                                                                                                                                                                                                                                                                                                                                                                                                                                                                                                                                                                                                                                                                                                                                                                                                                                                                                                                                                                                                                                                                                                                                                    | Ethers             |                   |            |              |   |      |             |       |   |      |             |         |   |      |             |                    |   |      |              |                    |   |      |             |         |   |      |             |        |   |      |             |         |   |      |             |        |   |      |             |        |    |      |             |        |    |      |             |        |    |      |             |        |    |      |             |        |    |     |             |        |    |     |             |        |    |     |             |        |    |     |             |        |    |     |             |        |    |     |             |        |    |     |             |        |    |     |             |        |
| 16                            | 850               | C-O stretch                                                                                                                                                                                                                                                                                                                                                                                                                                                                                                                                                                                                                                                                                                                                                                                                                                                                                                                                                                                                                                                                                                                                                                                                                                                                                                                                                                                                                                                                                                                                                                                                                                                                    | Ethers             |                   |            |              |   |      |             |       |   |      |             |         |   |      |             |                    |   |      |              |                    |   |      |             |         |   |      |             |        |   |      |             |         |   |      |             |        |   |      |             |        |    |      |             |        |    |      |             |        |    |      |             |        |    |      |             |        |    |     |             |        |    |     |             |        |    |     |             |        |    |     |             |        |    |     |             |        |    |     |             |        |    |     |             |        |    |     |             |        |
| 17                            | 800               | C-O stretch                                                                                                                                                                                                                                                                                                                                                                                                                                                                                                                                                                                                                                                                                                                                                                                                                                                                                                                                                                                                                                                                                                                                                                                                                                                                                                                                                                                                                                                                                                                                                                                                                                                                    | Ethers             |                   |            |              |   |      |             |       |   |      |             |         |   |      |             |                    |   |      |              |                    |   |      |             |         |   |      |             |        |   |      |             |         |   |      |             |        |   |      |             |        |    |      |             |        |    |      |             |        |    |      |             |        |    |      |             |        |    |     |             |        |    |     |             |        |    |     |             |        |    |     |             |        |    |     |             |        |    |     |             |        |    |     |             |        |    |     |             |        |
| 18                            | 750               | C-O stretch                                                                                                                                                                                                                                                                                                                                                                                                                                                                                                                                                                                                                                                                                                                                                                                                                                                                                                                                                                                                                                                                                                                                                                                                                                                                                                                                                                                                                                                                                                                                                                                                                                                                    | Ethers             |                   |            |              |   |      |             |       |   |      |             |         |   |      |             |                    |   |      |              |                    |   |      |             |         |   |      |             |        |   |      |             |         |   |      |             |        |   |      |             |        |    |      |             |        |    |      |             |        |    |      |             |        |    |      |             |        |    |     |             |        |    |     |             |        |    |     |             |        |    |     |             |        |    |     |             |        |    |     |             |        |    |     |             |        |    |     |             |        |
| 19                            | 700               | C-O stretch                                                                                                                                                                                                                                                                                                                                                                                                                                                                                                                                                                                                                                                                                                                                                                                                                                                                                                                                                                                                                                                                                                                                                                                                                                                                                                                                                                                                                                                                                                                                                                                                                                                                    | Ethers             |                   |            |              |   |      |             |       |   |      |             |         |   |      |             |                    |   |      |              |                    |   |      |             |         |   |      |             |        |   |      |             |         |   |      |             |        |   |      |             |        |    |      |             |        |    |      |             |        |    |      |             |        |    |      |             |        |    |     |             |        |    |     |             |        |    |     |             |        |    |     |             |        |    |     |             |        |    |     |             |        |    |     |             |        |    |     |             |        |
| 20                            | 650               | C-O stretch                                                                                                                                                                                                                                                                                                                                                                                                                                                                                                                                                                                                                                                                                                                                                                                                                                                                                                                                                                                                                                                                                                                                                                                                                                                                                                                                                                                                                                                                                                                                                                                                                                                                    | Ethers             |                   |            |              |   |      |             |       |   |      |             |         |   |      |             |                    |   |      |              |                    |   |      |             |         |   |      |             |        |   |      |             |         |   |      |             |        |   |      |             |        |    |      |             |        |    |      |             |        |    |      |             |        |    |      |             |        |    |     |             |        |    |     |             |        |    |     |             |        |    |     |             |        |    |     |             |        |    |     |             |        |    |     |             |        |    |     |             |        |
| 21                            | 600               | C-O stretch                                                                                                                                                                                                                                                                                                                                                                                                                                                                                                                                                                                                                                                                                                                                                                                                                                                                                                                                                                                                                                                                                                                                                                                                                                                                                                                                                                                                                                                                                                                                                                                                                                                                    | Ethers             |                   |            |              |   |      |             |       |   |      |             |         |   |      |             |                    |   |      |              |                    |   |      |             |         |   |      |             |        |   |      |             |         |   |      |             |        |   |      |             |        |    |      |             |        |    |      |             |        |    |      |             |        |    |      |             |        |    |     |             |        |    |     |             |        |    |     |             |        |    |     |             |        |    |     |             |        |    |     |             |        |    |     |             |        |    |     |             |        |
| <p>CABS-NW-<br/>Shallow-5</p> |                   | <table border="1"> <thead> <tr> <th>Peak</th> <th>Wavenumber (cm⁻¹)</th> <th>Assignment</th> <th>Library Name</th> </tr> </thead> <tbody> <tr><td>1</td><td>3400</td><td>O-H stretch</td><td>Water</td></tr> <tr><td>2</td><td>2900</td><td>C-H stretch</td><td>Alkanes</td></tr> <tr><td>3</td><td>1700</td><td>C=O stretch</td><td>Carbonyl Compounds</td></tr> <tr><td>4</td><td>1600</td><td>Aromatic C=C</td><td>Aromatic Compounds</td></tr> <tr><td>5</td><td>1500</td><td>C=C stretch</td><td>Alkenes</td></tr> <tr><td>6</td><td>1450</td><td>C-O stretch</td><td>Ethers</td></tr> <tr><td>7</td><td>1400</td><td>C=C stretch</td><td>Alkenes</td></tr> <tr><td>8</td><td>1380</td><td>C-O stretch</td><td>Ethers</td></tr> <tr><td>9</td><td>1300</td><td>C-O stretch</td><td>Ethers</td></tr> <tr><td>10</td><td>1250</td><td>C-O stretch</td><td>Ethers</td></tr> <tr><td>11</td><td>1100</td><td>C-O stretch</td><td>Ethers</td></tr> <tr><td>12</td><td>1050</td><td>C-O stretch</td><td>Ethers</td></tr> <tr><td>13</td><td>1000</td><td>C-O stretch</td><td>Ethers</td></tr> <tr><td>14</td><td>950</td><td>C-O stretch</td><td>Ethers</td></tr> <tr><td>15</td><td>900</td><td>C-O stretch</td><td>Ethers</td></tr> <tr><td>16</td><td>850</td><td>C-O stretch</td><td>Ethers</td></tr> <tr><td>17</td><td>800</td><td>C-O stretch</td><td>Ethers</td></tr> <tr><td>18</td><td>750</td><td>C-O stretch</td><td>Ethers</td></tr> <tr><td>19</td><td>700</td><td>C-O stretch</td><td>Ethers</td></tr> <tr><td>20</td><td>650</td><td>C-O stretch</td><td>Ethers</td></tr> <tr><td>21</td><td>600</td><td>C-O stretch</td><td>Ethers</td></tr> </tbody> </table> | Peak               | Wavenumber (cm⁻¹) | Assignment | Library Name | 1 | 3400 | O-H stretch | Water | 2 | 2900 | C-H stretch | Alkanes | 3 | 1700 | C=O stretch | Carbonyl Compounds | 4 | 1600 | Aromatic C=C | Aromatic Compounds | 5 | 1500 | C=C stretch | Alkenes | 6 | 1450 | C-O stretch | Ethers | 7 | 1400 | C=C stretch | Alkenes | 8 | 1380 | C-O stretch | Ethers | 9 | 1300 | C-O stretch | Ethers | 10 | 1250 | C-O stretch | Ethers | 11 | 1100 | C-O stretch | Ethers | 12 | 1050 | C-O stretch | Ethers | 13 | 1000 | C-O stretch | Ethers | 14 | 950 | C-O stretch | Ethers | 15 | 900 | C-O stretch | Ethers | 16 | 850 | C-O stretch | Ethers | 17 | 800 | C-O stretch | Ethers | 18 | 750 | C-O stretch | Ethers | 19 | 700 | C-O stretch | Ethers | 20 | 650 | C-O stretch | Ethers | 21 | 600 | C-O stretch | Ethers |
| Peak                          | Wavenumber (cm⁻¹) | Assignment                                                                                                                                                                                                                                                                                                                                                                                                                                                                                                                                                                                                                                                                                                                                                                                                                                                                                                                                                                                                                                                                                                                                                                                                                                                                                                                                                                                                                                                                                                                                                                                                                                                                     | Library Name       |                   |            |              |   |      |             |       |   |      |             |         |   |      |             |                    |   |      |              |                    |   |      |             |         |   |      |             |        |   |      |             |         |   |      |             |        |   |      |             |        |    |      |             |        |    |      |             |        |    |      |             |        |    |      |             |        |    |     |             |        |    |     |             |        |    |     |             |        |    |     |             |        |    |     |             |        |    |     |             |        |    |     |             |        |    |     |             |        |
| 1                             | 3400              | O-H stretch                                                                                                                                                                                                                                                                                                                                                                                                                                                                                                                                                                                                                                                                                                                                                                                                                                                                                                                                                                                                                                                                                                                                                                                                                                                                                                                                                                                                                                                                                                                                                                                                                                                                    | Water              |                   |            |              |   |      |             |       |   |      |             |         |   |      |             |                    |   |      |              |                    |   |      |             |         |   |      |             |        |   |      |             |         |   |      |             |        |   |      |             |        |    |      |             |        |    |      |             |        |    |      |             |        |    |      |             |        |    |     |             |        |    |     |             |        |    |     |             |        |    |     |             |        |    |     |             |        |    |     |             |        |    |     |             |        |    |     |             |        |
| 2                             | 2900              | C-H stretch                                                                                                                                                                                                                                                                                                                                                                                                                                                                                                                                                                                                                                                                                                                                                                                                                                                                                                                                                                                                                                                                                                                                                                                                                                                                                                                                                                                                                                                                                                                                                                                                                                                                    | Alkanes            |                   |            |              |   |      |             |       |   |      |             |         |   |      |             |                    |   |      |              |                    |   |      |             |         |   |      |             |        |   |      |             |         |   |      |             |        |   |      |             |        |    |      |             |        |    |      |             |        |    |      |             |        |    |      |             |        |    |     |             |        |    |     |             |        |    |     |             |        |    |     |             |        |    |     |             |        |    |     |             |        |    |     |             |        |    |     |             |        |
| 3                             | 1700              | C=O stretch                                                                                                                                                                                                                                                                                                                                                                                                                                                                                                                                                                                                                                                                                                                                                                                                                                                                                                                                                                                                                                                                                                                                                                                                                                                                                                                                                                                                                                                                                                                                                                                                                                                                    | Carbonyl Compounds |                   |            |              |   |      |             |       |   |      |             |         |   |      |             |                    |   |      |              |                    |   |      |             |         |   |      |             |        |   |      |             |         |   |      |             |        |   |      |             |        |    |      |             |        |    |      |             |        |    |      |             |        |    |      |             |        |    |     |             |        |    |     |             |        |    |     |             |        |    |     |             |        |    |     |             |        |    |     |             |        |    |     |             |        |    |     |             |        |
| 4                             | 1600              | Aromatic C=C                                                                                                                                                                                                                                                                                                                                                                                                                                                                                                                                                                                                                                                                                                                                                                                                                                                                                                                                                                                                                                                                                                                                                                                                                                                                                                                                                                                                                                                                                                                                                                                                                                                                   | Aromatic Compounds |                   |            |              |   |      |             |       |   |      |             |         |   |      |             |                    |   |      |              |                    |   |      |             |         |   |      |             |        |   |      |             |         |   |      |             |        |   |      |             |        |    |      |             |        |    |      |             |        |    |      |             |        |    |      |             |        |    |     |             |        |    |     |             |        |    |     |             |        |    |     |             |        |    |     |             |        |    |     |             |        |    |     |             |        |    |     |             |        |
| 5                             | 1500              | C=C stretch                                                                                                                                                                                                                                                                                                                                                                                                                                                                                                                                                                                                                                                                                                                                                                                                                                                                                                                                                                                                                                                                                                                                                                                                                                                                                                                                                                                                                                                                                                                                                                                                                                                                    | Alkenes            |                   |            |              |   |      |             |       |   |      |             |         |   |      |             |                    |   |      |              |                    |   |      |             |         |   |      |             |        |   |      |             |         |   |      |             |        |   |      |             |        |    |      |             |        |    |      |             |        |    |      |             |        |    |      |             |        |    |     |             |        |    |     |             |        |    |     |             |        |    |     |             |        |    |     |             |        |    |     |             |        |    |     |             |        |    |     |             |        |
| 6                             | 1450              | C-O stretch                                                                                                                                                                                                                                                                                                                                                                                                                                                                                                                                                                                                                                                                                                                                                                                                                                                                                                                                                                                                                                                                                                                                                                                                                                                                                                                                                                                                                                                                                                                                                                                                                                                                    | Ethers             |                   |            |              |   |      |             |       |   |      |             |         |   |      |             |                    |   |      |              |                    |   |      |             |         |   |      |             |        |   |      |             |         |   |      |             |        |   |      |             |        |    |      |             |        |    |      |             |        |    |      |             |        |    |      |             |        |    |     |             |        |    |     |             |        |    |     |             |        |    |     |             |        |    |     |             |        |    |     |             |        |    |     |             |        |    |     |             |        |
| 7                             | 1400              | C=C stretch                                                                                                                                                                                                                                                                                                                                                                                                                                                                                                                                                                                                                                                                                                                                                                                                                                                                                                                                                                                                                                                                                                                                                                                                                                                                                                                                                                                                                                                                                                                                                                                                                                                                    | Alkenes            |                   |            |              |   |      |             |       |   |      |             |         |   |      |             |                    |   |      |              |                    |   |      |             |         |   |      |             |        |   |      |             |         |   |      |             |        |   |      |             |        |    |      |             |        |    |      |             |        |    |      |             |        |    |      |             |        |    |     |             |        |    |     |             |        |    |     |             |        |    |     |             |        |    |     |             |        |    |     |             |        |    |     |             |        |    |     |             |        |
| 8                             | 1380              | C-O stretch                                                                                                                                                                                                                                                                                                                                                                                                                                                                                                                                                                                                                                                                                                                                                                                                                                                                                                                                                                                                                                                                                                                                                                                                                                                                                                                                                                                                                                                                                                                                                                                                                                                                    | Ethers             |                   |            |              |   |      |             |       |   |      |             |         |   |      |             |                    |   |      |              |                    |   |      |             |         |   |      |             |        |   |      |             |         |   |      |             |        |   |      |             |        |    |      |             |        |    |      |             |        |    |      |             |        |    |      |             |        |    |     |             |        |    |     |             |        |    |     |             |        |    |     |             |        |    |     |             |        |    |     |             |        |    |     |             |        |    |     |             |        |
| 9                             | 1300              | C-O stretch                                                                                                                                                                                                                                                                                                                                                                                                                                                                                                                                                                                                                                                                                                                                                                                                                                                                                                                                                                                                                                                                                                                                                                                                                                                                                                                                                                                                                                                                                                                                                                                                                                                                    | Ethers             |                   |            |              |   |      |             |       |   |      |             |         |   |      |             |                    |   |      |              |                    |   |      |             |         |   |      |             |        |   |      |             |         |   |      |             |        |   |      |             |        |    |      |             |        |    |      |             |        |    |      |             |        |    |      |             |        |    |     |             |        |    |     |             |        |    |     |             |        |    |     |             |        |    |     |             |        |    |     |             |        |    |     |             |        |    |     |             |        |
| 10                            | 1250              | C-O stretch                                                                                                                                                                                                                                                                                                                                                                                                                                                                                                                                                                                                                                                                                                                                                                                                                                                                                                                                                                                                                                                                                                                                                                                                                                                                                                                                                                                                                                                                                                                                                                                                                                                                    | Ethers             |                   |            |              |   |      |             |       |   |      |             |         |   |      |             |                    |   |      |              |                    |   |      |             |         |   |      |             |        |   |      |             |         |   |      |             |        |   |      |             |        |    |      |             |        |    |      |             |        |    |      |             |        |    |      |             |        |    |     |             |        |    |     |             |        |    |     |             |        |    |     |             |        |    |     |             |        |    |     |             |        |    |     |             |        |    |     |             |        |
| 11                            | 1100              | C-O stretch                                                                                                                                                                                                                                                                                                                                                                                                                                                                                                                                                                                                                                                                                                                                                                                                                                                                                                                                                                                                                                                                                                                                                                                                                                                                                                                                                                                                                                                                                                                                                                                                                                                                    | Ethers             |                   |            |              |   |      |             |       |   |      |             |         |   |      |             |                    |   |      |              |                    |   |      |             |         |   |      |             |        |   |      |             |         |   |      |             |        |   |      |             |        |    |      |             |        |    |      |             |        |    |      |             |        |    |      |             |        |    |     |             |        |    |     |             |        |    |     |             |        |    |     |             |        |    |     |             |        |    |     |             |        |    |     |             |        |    |     |             |        |
| 12                            | 1050              | C-O stretch                                                                                                                                                                                                                                                                                                                                                                                                                                                                                                                                                                                                                                                                                                                                                                                                                                                                                                                                                                                                                                                                                                                                                                                                                                                                                                                                                                                                                                                                                                                                                                                                                                                                    | Ethers             |                   |            |              |   |      |             |       |   |      |             |         |   |      |             |                    |   |      |              |                    |   |      |             |         |   |      |             |        |   |      |             |         |   |      |             |        |   |      |             |        |    |      |             |        |    |      |             |        |    |      |             |        |    |      |             |        |    |     |             |        |    |     |             |        |    |     |             |        |    |     |             |        |    |     |             |        |    |     |             |        |    |     |             |        |    |     |             |        |
| 13                            | 1000              | C-O stretch                                                                                                                                                                                                                                                                                                                                                                                                                                                                                                                                                                                                                                                                                                                                                                                                                                                                                                                                                                                                                                                                                                                                                                                                                                                                                                                                                                                                                                                                                                                                                                                                                                                                    | Ethers             |                   |            |              |   |      |             |       |   |      |             |         |   |      |             |                    |   |      |              |                    |   |      |             |         |   |      |             |        |   |      |             |         |   |      |             |        |   |      |             |        |    |      |             |        |    |      |             |        |    |      |             |        |    |      |             |        |    |     |             |        |    |     |             |        |    |     |             |        |    |     |             |        |    |     |             |        |    |     |             |        |    |     |             |        |    |     |             |        |
| 14                            | 950               | C-O stretch                                                                                                                                                                                                                                                                                                                                                                                                                                                                                                                                                                                                                                                                                                                                                                                                                                                                                                                                                                                                                                                                                                                                                                                                                                                                                                                                                                                                                                                                                                                                                                                                                                                                    | Ethers             |                   |            |              |   |      |             |       |   |      |             |         |   |      |             |                    |   |      |              |                    |   |      |             |         |   |      |             |        |   |      |             |         |   |      |             |        |   |      |             |        |    |      |             |        |    |      |             |        |    |      |             |        |    |      |             |        |    |     |             |        |    |     |             |        |    |     |             |        |    |     |             |        |    |     |             |        |    |     |             |        |    |     |             |        |    |     |             |        |
| 15                            | 900               | C-O stretch                                                                                                                                                                                                                                                                                                                                                                                                                                                                                                                                                                                                                                                                                                                                                                                                                                                                                                                                                                                                                                                                                                                                                                                                                                                                                                                                                                                                                                                                                                                                                                                                                                                                    | Ethers             |                   |            |              |   |      |             |       |   |      |             |         |   |      |             |                    |   |      |              |                    |   |      |             |         |   |      |             |        |   |      |             |         |   |      |             |        |   |      |             |        |    |      |             |        |    |      |             |        |    |      |             |        |    |      |             |        |    |     |             |        |    |     |             |        |    |     |             |        |    |     |             |        |    |     |             |        |    |     |             |        |    |     |             |        |    |     |             |        |
| 16                            | 850               | C-O stretch                                                                                                                                                                                                                                                                                                                                                                                                                                                                                                                                                                                                                                                                                                                                                                                                                                                                                                                                                                                                                                                                                                                                                                                                                                                                                                                                                                                                                                                                                                                                                                                                                                                                    | Ethers             |                   |            |              |   |      |             |       |   |      |             |         |   |      |             |                    |   |      |              |                    |   |      |             |         |   |      |             |        |   |      |             |         |   |      |             |        |   |      |             |        |    |      |             |        |    |      |             |        |    |      |             |        |    |      |             |        |    |     |             |        |    |     |             |        |    |     |             |        |    |     |             |        |    |     |             |        |    |     |             |        |    |     |             |        |    |     |             |        |
| 17                            | 800               | C-O stretch                                                                                                                                                                                                                                                                                                                                                                                                                                                                                                                                                                                                                                                                                                                                                                                                                                                                                                                                                                                                                                                                                                                                                                                                                                                                                                                                                                                                                                                                                                                                                                                                                                                                    | Ethers             |                   |            |              |   |      |             |       |   |      |             |         |   |      |             |                    |   |      |              |                    |   |      |             |         |   |      |             |        |   |      |             |         |   |      |             |        |   |      |             |        |    |      |             |        |    |      |             |        |    |      |             |        |    |      |             |        |    |     |             |        |    |     |             |        |    |     |             |        |    |     |             |        |    |     |             |        |    |     |             |        |    |     |             |        |    |     |             |        |
| 18                            | 750               | C-O stretch                                                                                                                                                                                                                                                                                                                                                                                                                                                                                                                                                                                                                                                                                                                                                                                                                                                                                                                                                                                                                                                                                                                                                                                                                                                                                                                                                                                                                                                                                                                                                                                                                                                                    | Ethers             |                   |            |              |   |      |             |       |   |      |             |         |   |      |             |                    |   |      |              |                    |   |      |             |         |   |      |             |        |   |      |             |         |   |      |             |        |   |      |             |        |    |      |             |        |    |      |             |        |    |      |             |        |    |      |             |        |    |     |             |        |    |     |             |        |    |     |             |        |    |     |             |        |    |     |             |        |    |     |             |        |    |     |             |        |    |     |             |        |
| 19                            | 700               | C-O stretch                                                                                                                                                                                                                                                                                                                                                                                                                                                                                                                                                                                                                                                                                                                                                                                                                                                                                                                                                                                                                                                                                                                                                                                                                                                                                                                                                                                                                                                                                                                                                                                                                                                                    | Ethers             |                   |            |              |   |      |             |       |   |      |             |         |   |      |             |                    |   |      |              |                    |   |      |             |         |   |      |             |        |   |      |             |         |   |      |             |        |   |      |             |        |    |      |             |        |    |      |             |        |    |      |             |        |    |      |             |        |    |     |             |        |    |     |             |        |    |     |             |        |    |     |             |        |    |     |             |        |    |     |             |        |    |     |             |        |    |     |             |        |
| 20                            | 650               | C-O stretch                                                                                                                                                                                                                                                                                                                                                                                                                                                                                                                                                                                                                                                                                                                                                                                                                                                                                                                                                                                                                                                                                                                                                                                                                                                                                                                                                                                                                                                                                                                                                                                                                                                                    | Ethers             |                   |            |              |   |      |             |       |   |      |             |         |   |      |             |                    |   |      |              |                    |   |      |             |         |   |      |             |        |   |      |             |         |   |      |             |        |   |      |             |        |    |      |             |        |    |      |             |        |    |      |             |        |    |      |             |        |    |     |             |        |    |     |             |        |    |     |             |        |    |     |             |        |    |     |             |        |    |     |             |        |    |     |             |        |    |     |             |        |
| 21                            | 600               | C-O stretch                                                                                                                                                                                                                                                                                                                                                                                                                                                                                                                                                                                                                                                                                                                                                                                                                                                                                                                                                                                                                                                                                                                                                                                                                                                                                                                                                                                                                                                                                                                                                                                                                                                                    | Ethers             |                   |            |              |   |      |             |       |   |      |             |         |   |      |             |                    |   |      |              |                    |   |      |             |         |   |      |             |        |   |      |             |         |   |      |             |        |   |      |             |        |    |      |             |        |    |      |             |        |    |      |             |        |    |      |             |        |    |     |             |        |    |     |             |        |    |     |             |        |    |     |             |        |    |     |             |        |    |     |             |        |    |     |             |        |    |     |             |        |

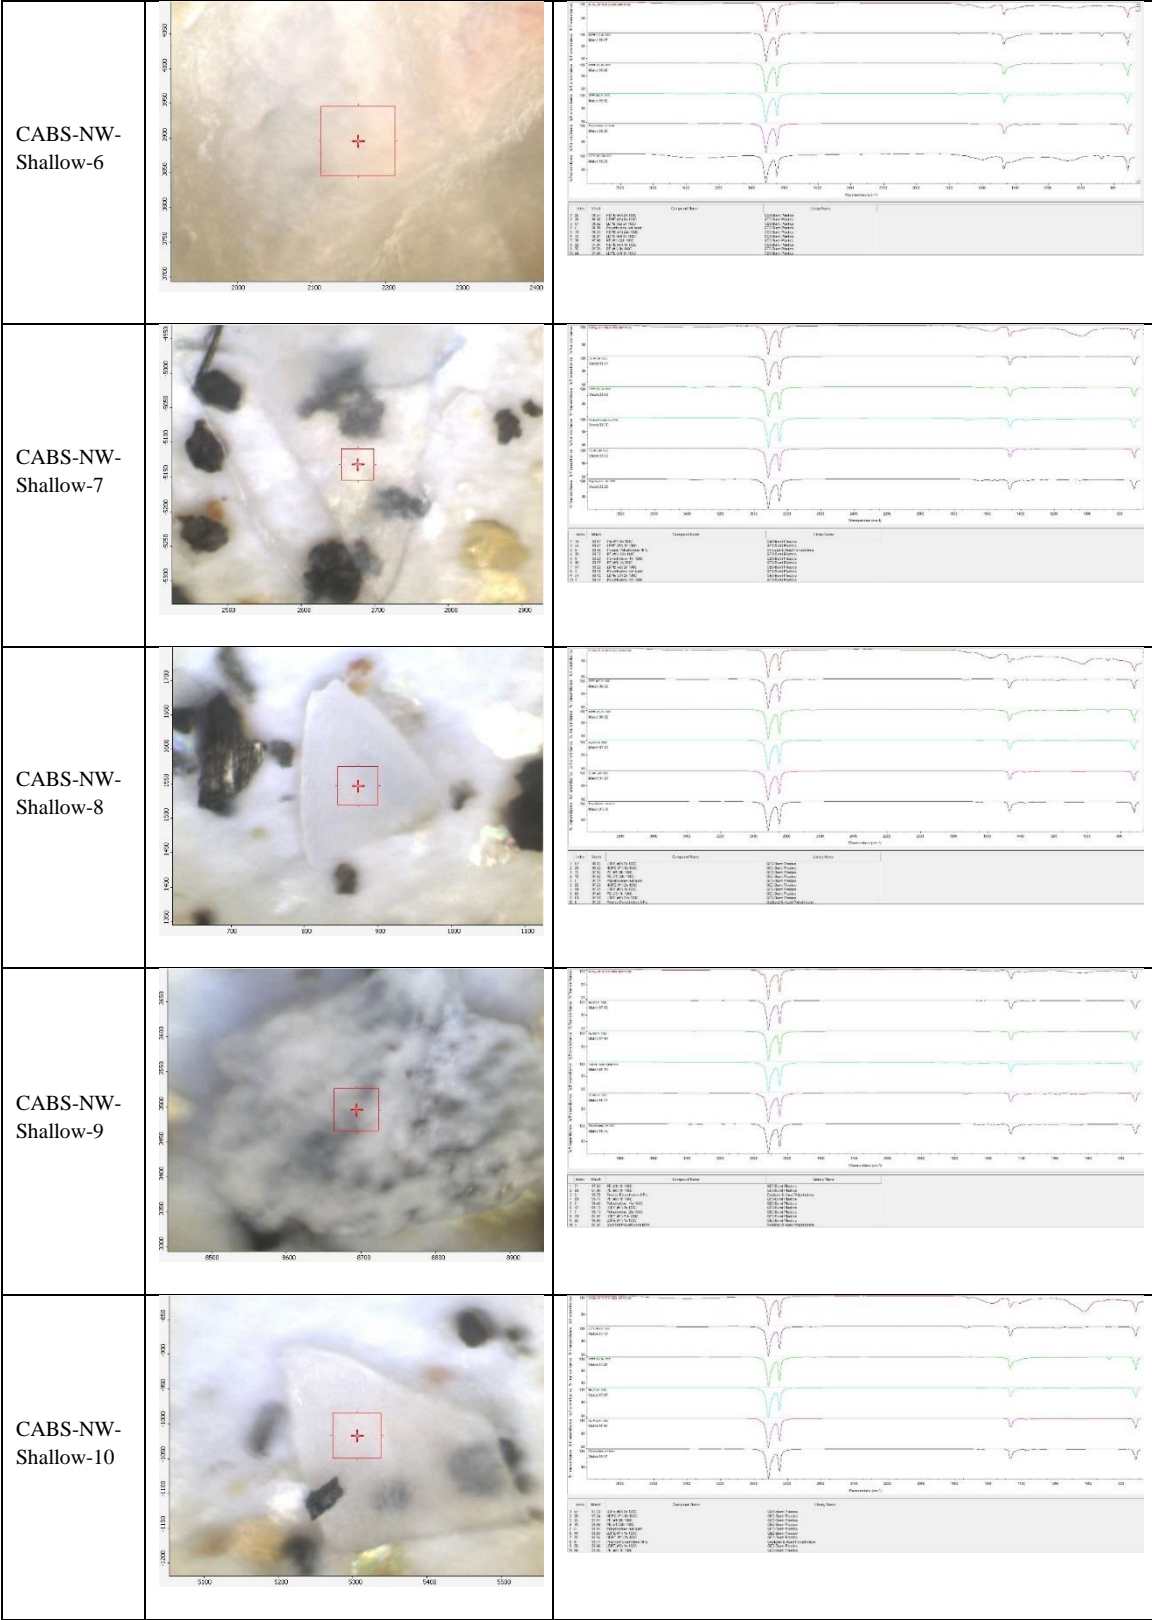

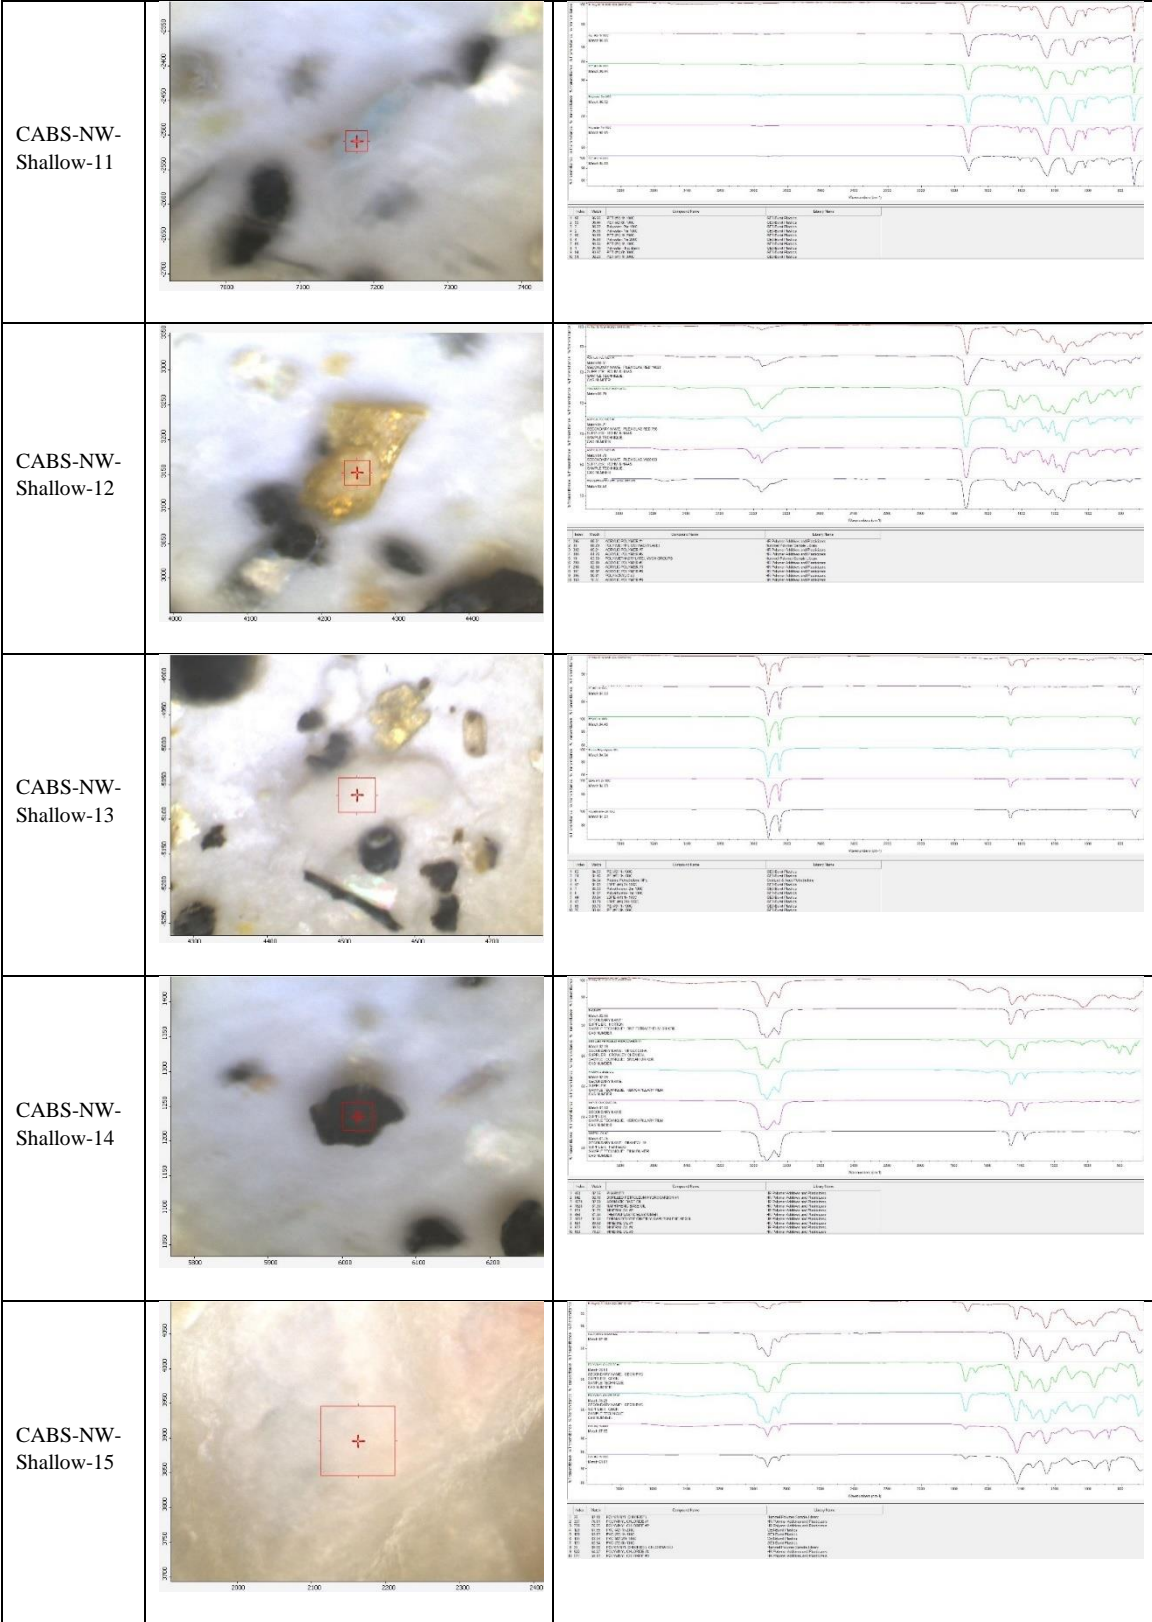

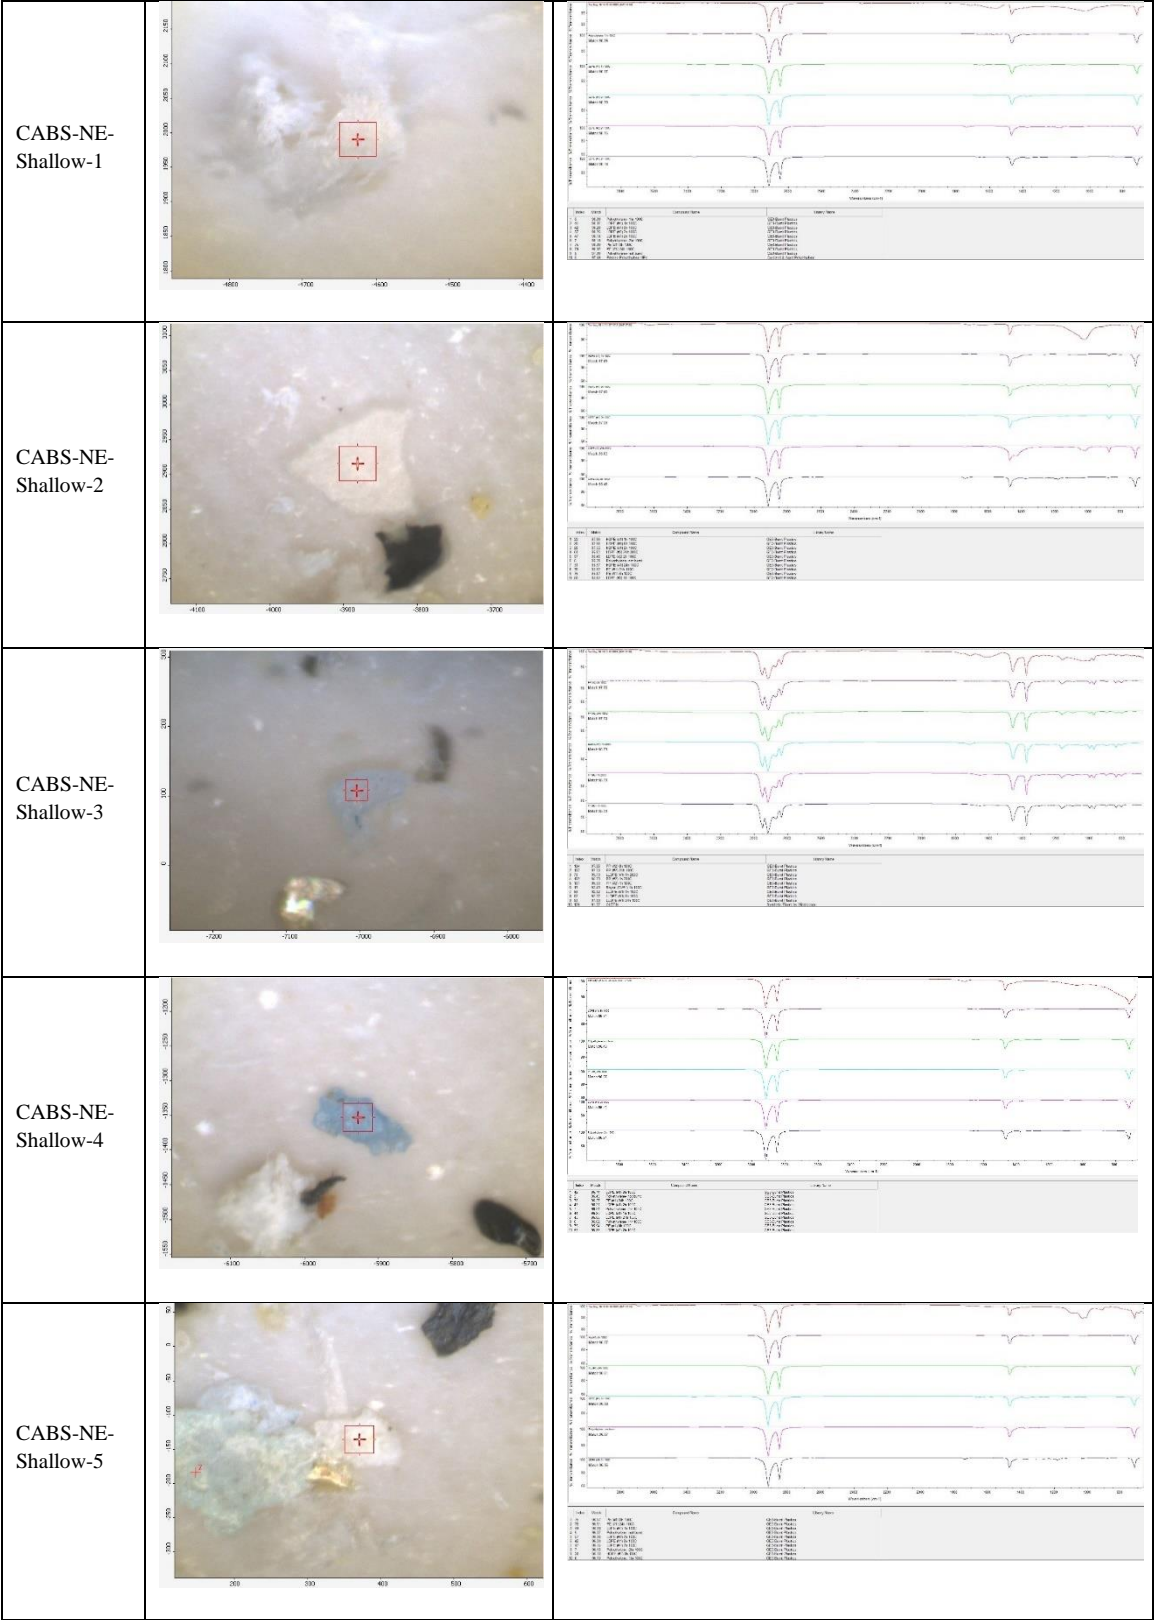

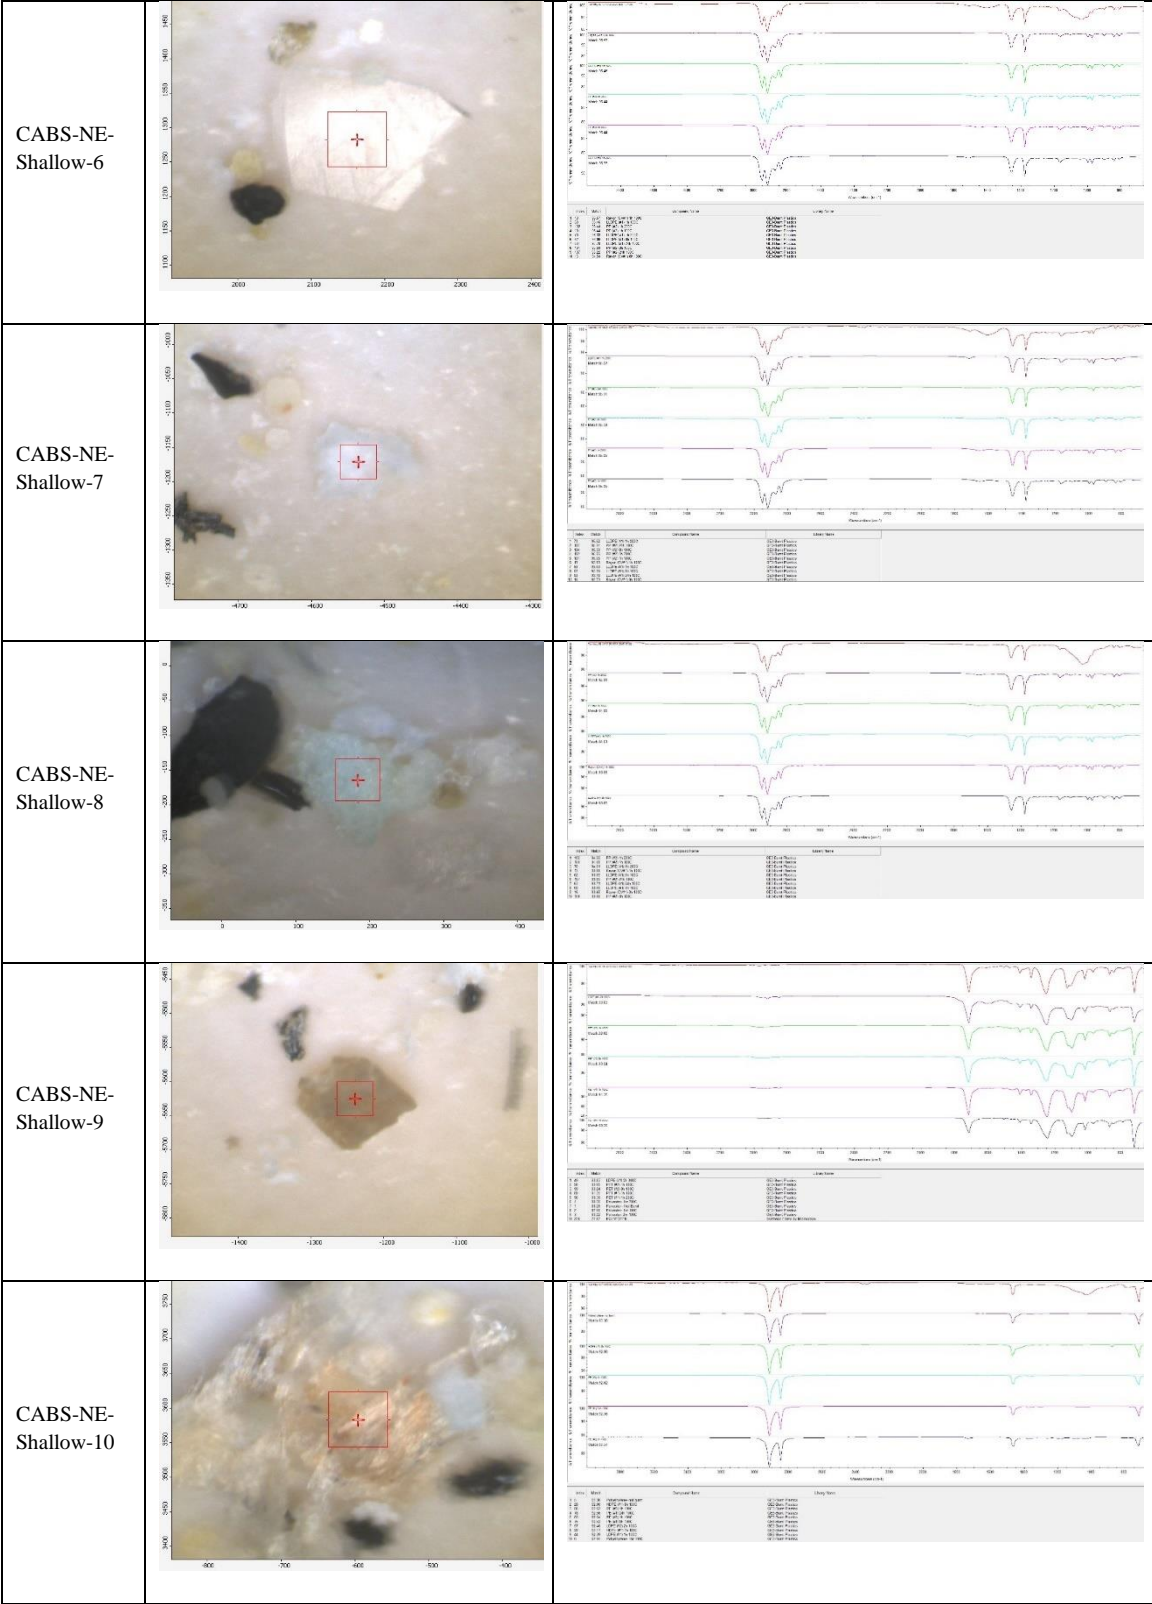



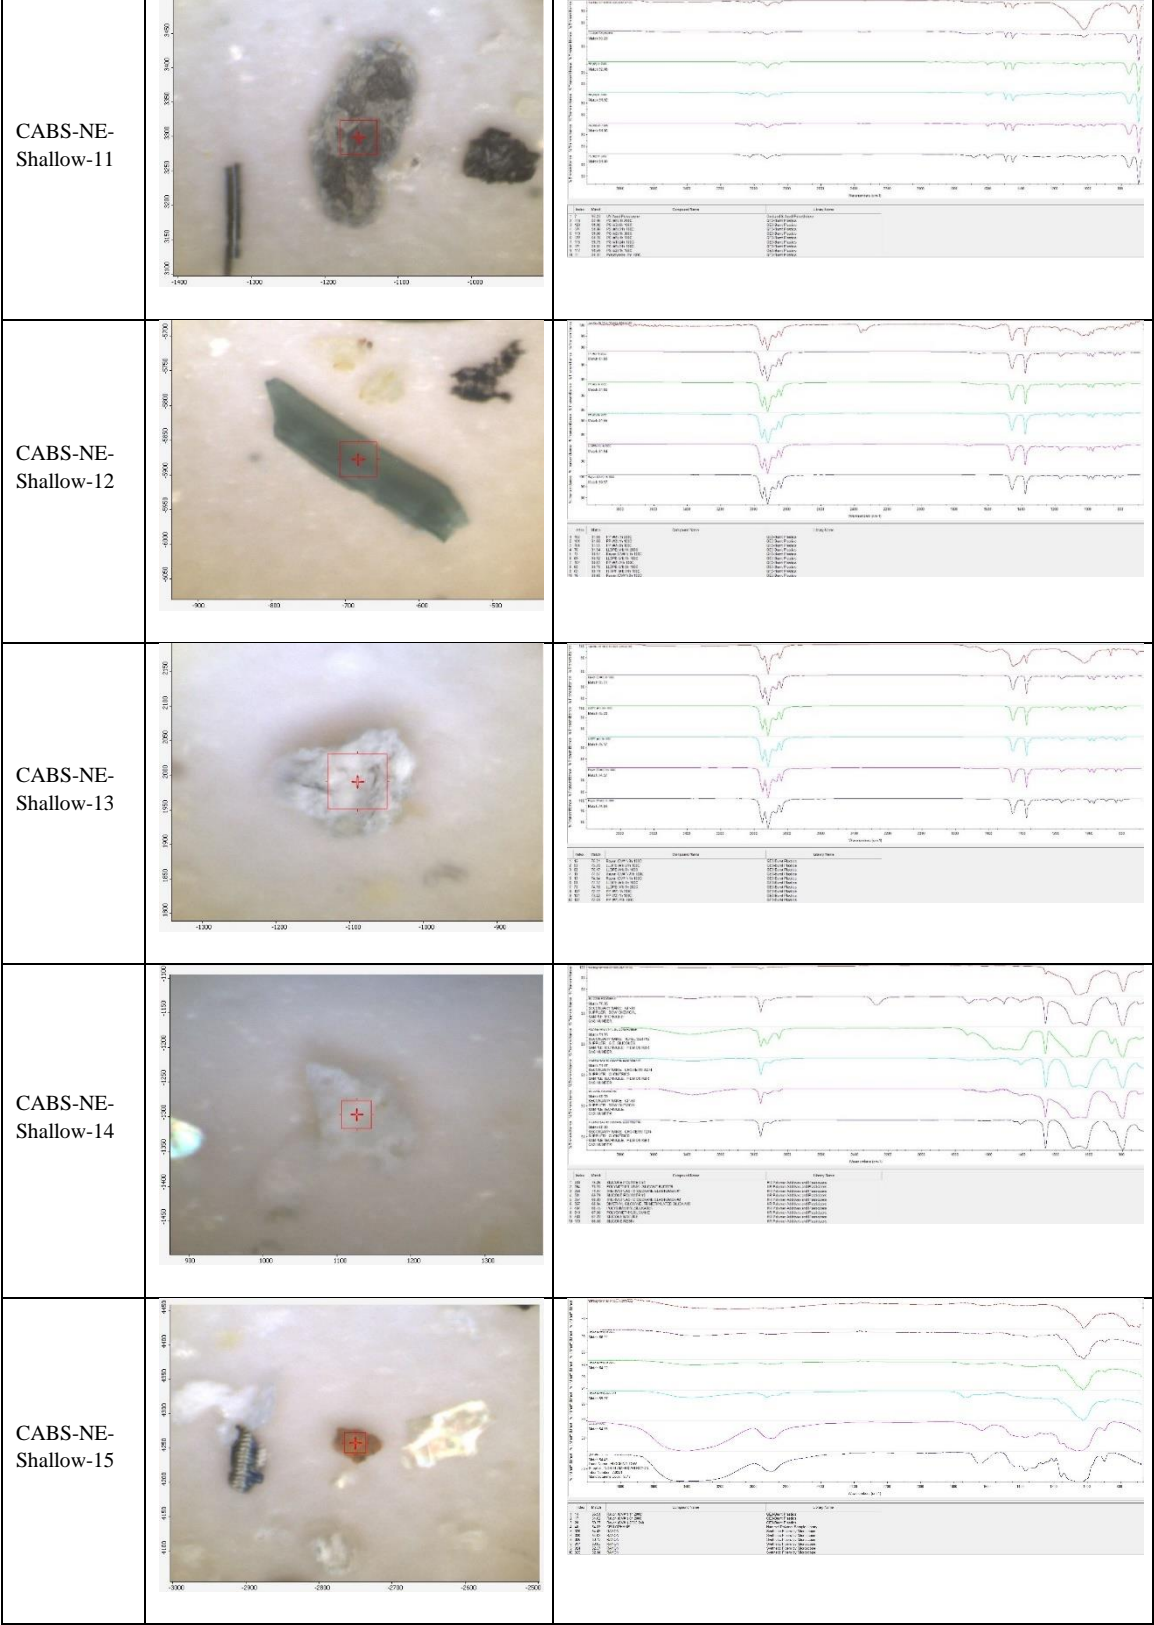

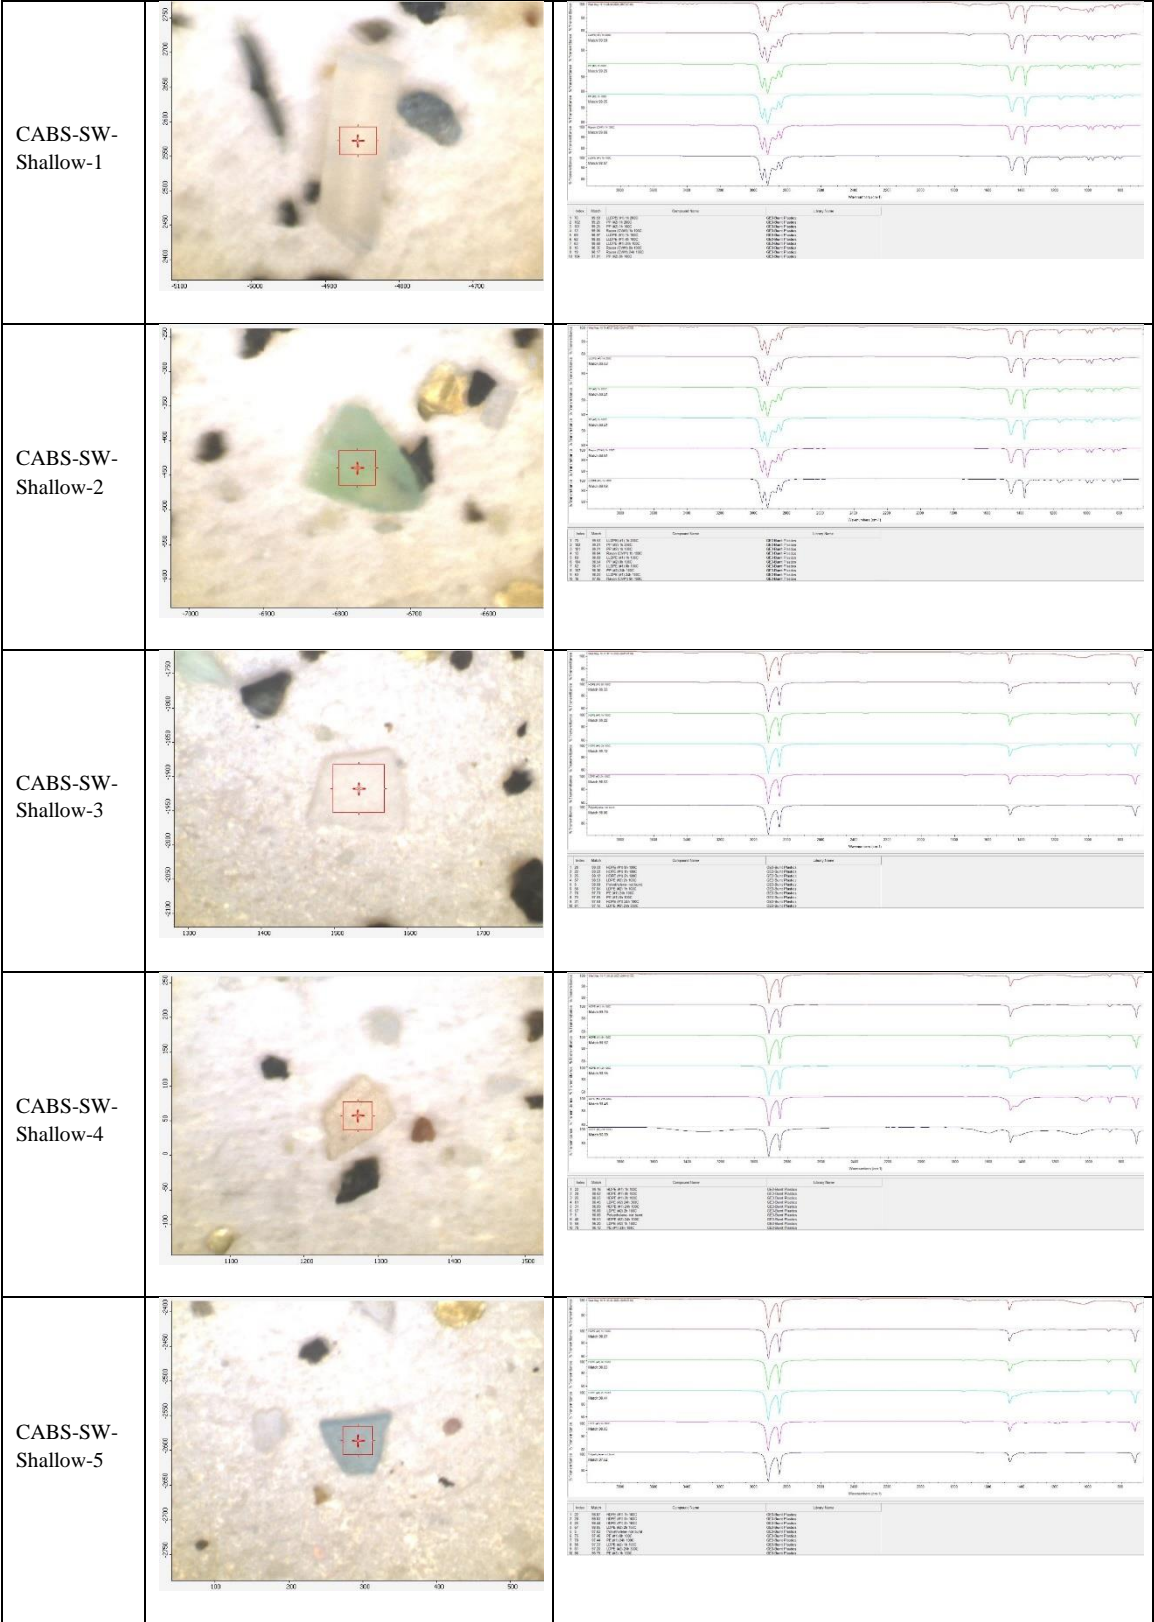

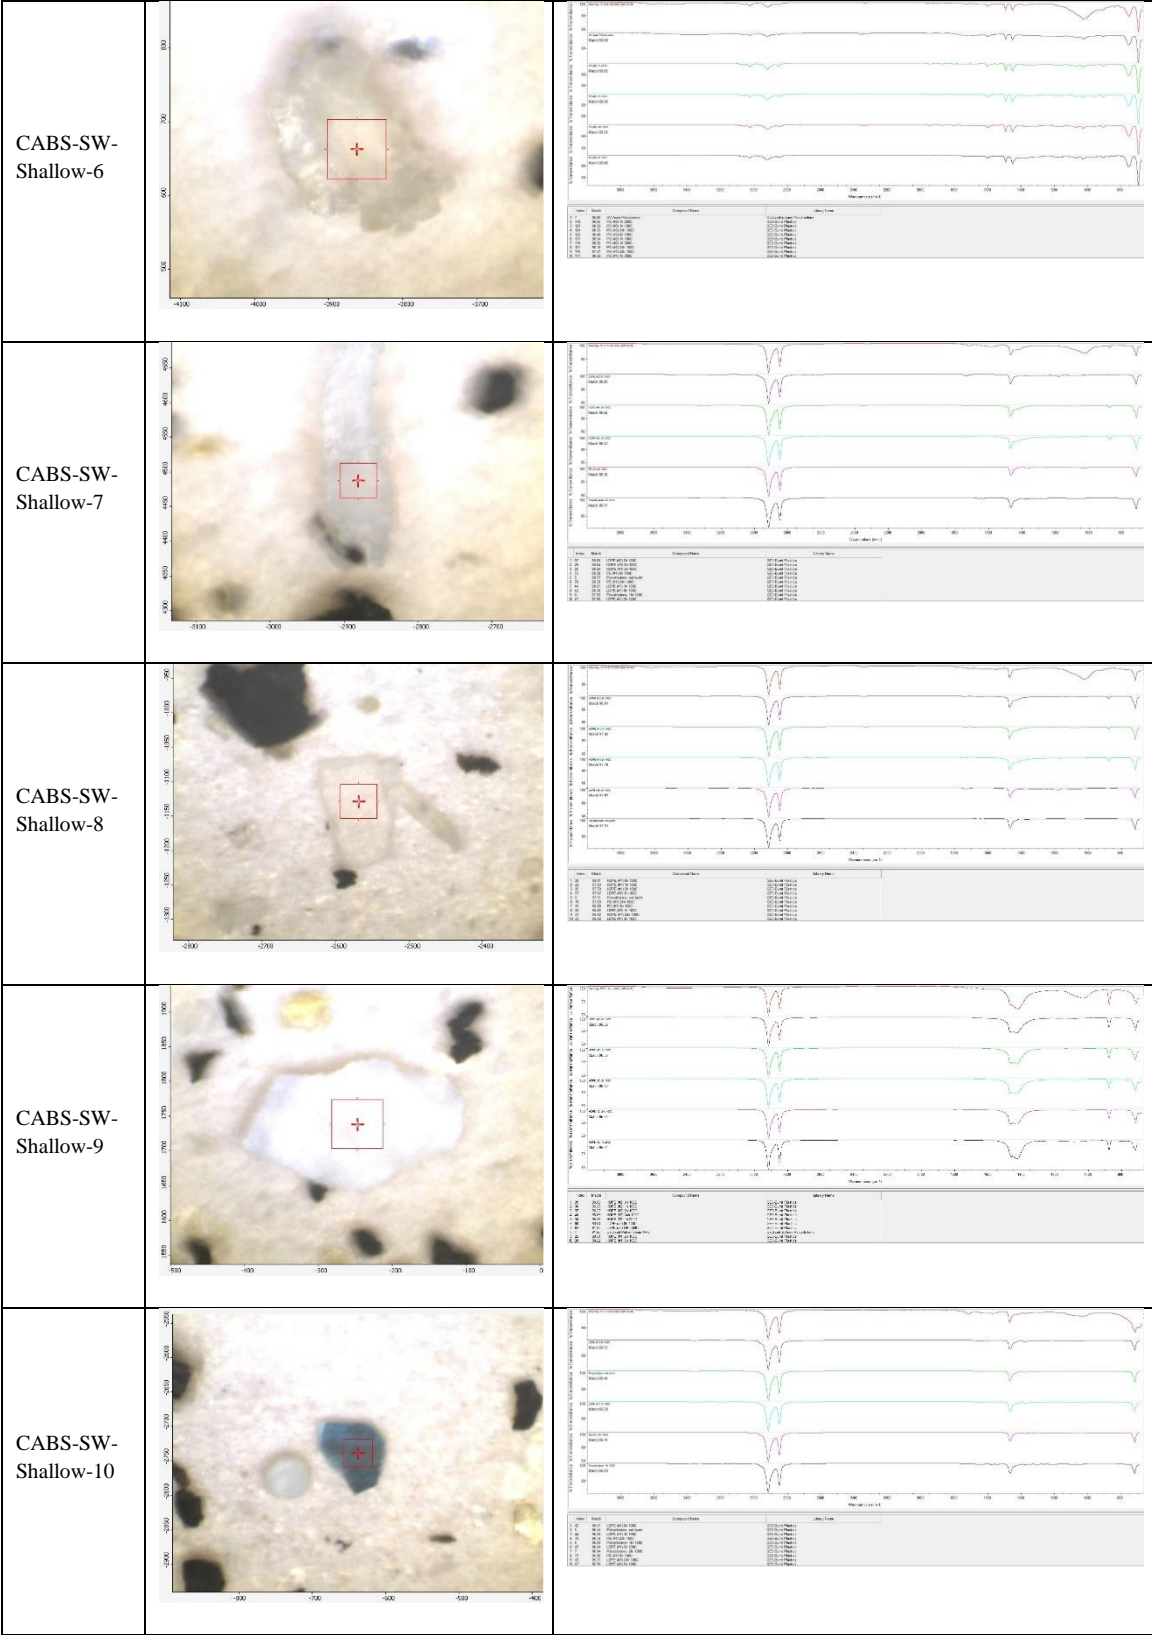

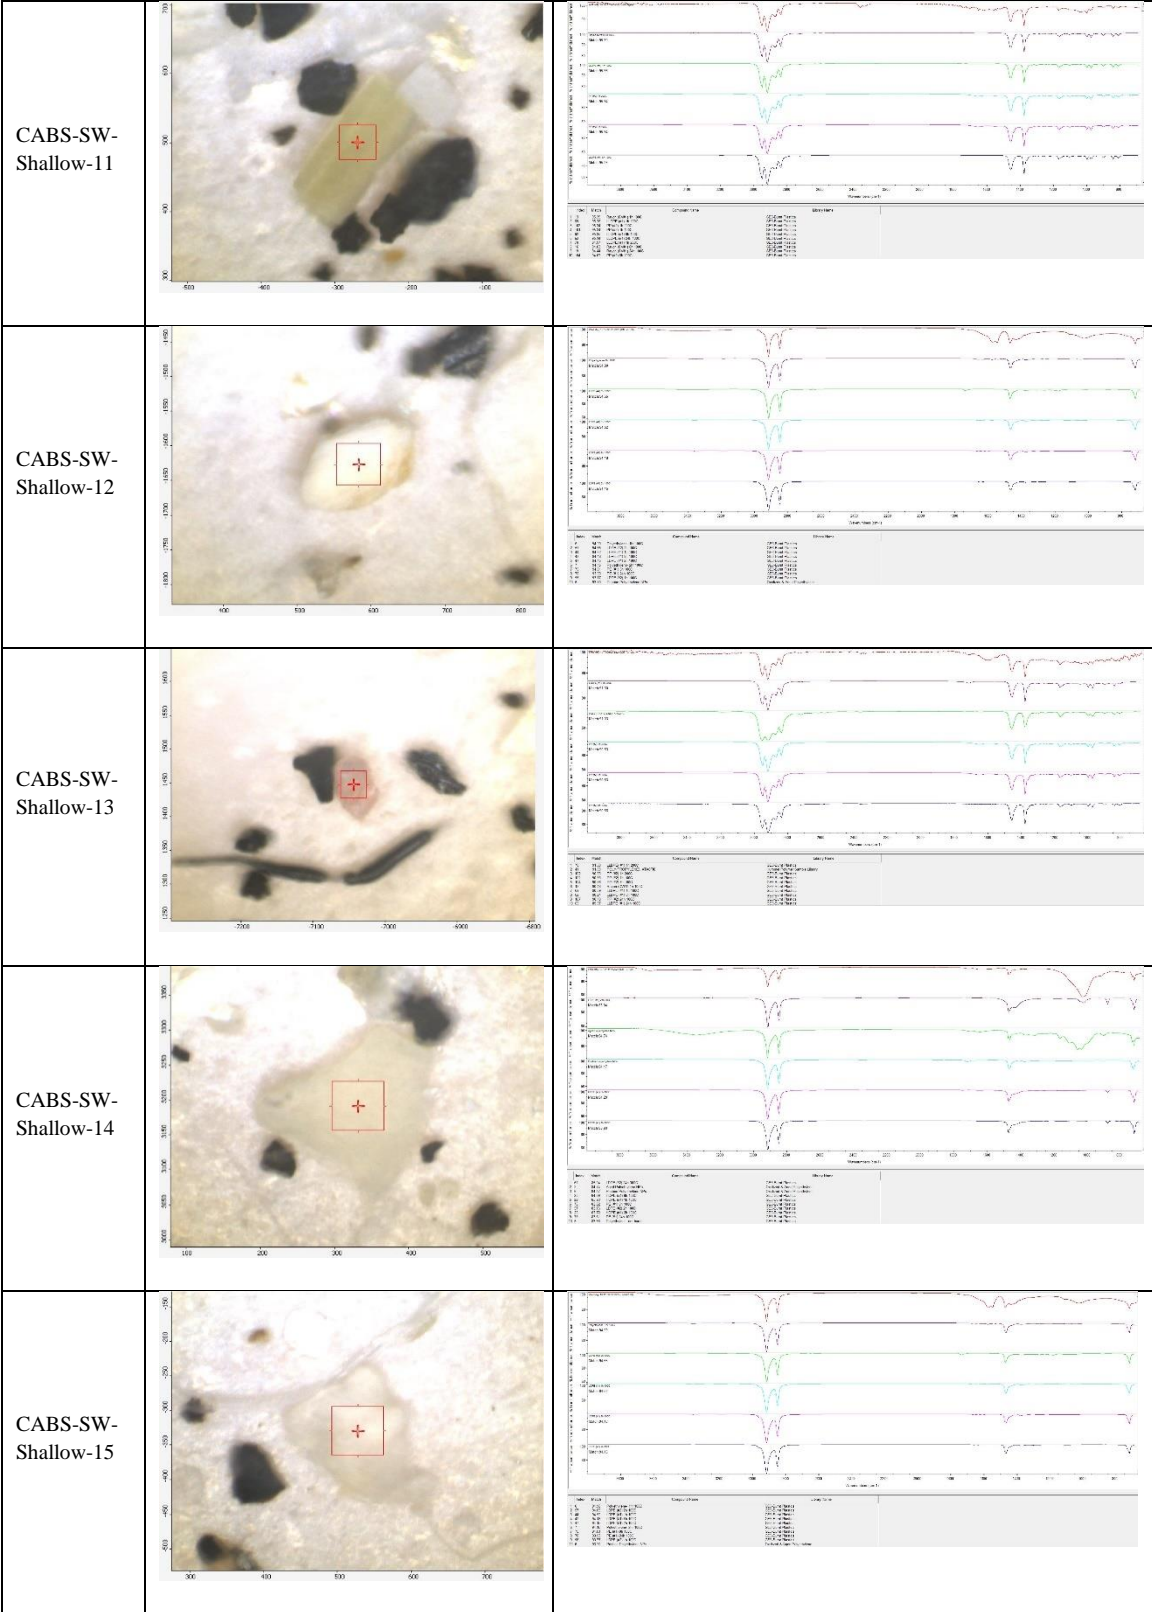

|                        |                                                                                   |                                                                                    |
|------------------------|-----------------------------------------------------------------------------------|------------------------------------------------------------------------------------|
| CABS-SE-<br>Shallow-1  |  |  |
| CABS-SE-<br>Shallow-2  | <b>n/a due to excessive ash</b>                                                   | <b>n/a due to excessive ash</b>                                                    |
| CABS-SE-<br>Shallow-3  | <b>n/a due to excessive ash</b>                                                   | <b>n/a due to excessive ash</b>                                                    |
| CABS-SE-<br>Shallow-4  | <b>n/a due to excessive ash</b>                                                   | <b>n/a due to excessive ash</b>                                                    |
| CABS-SE-<br>Shallow-5  | <b>n/a due to excessive ash</b>                                                   | <b>n/a due to excessive ash</b>                                                    |
| CABS-SE-<br>Shallow-6  | <b>n/a due to excessive ash</b>                                                   | <b>n/a due to excessive ash</b>                                                    |
| CABS-SE-<br>Shallow-7  | <b>n/a due to excessive ash</b>                                                   | <b>n/a due to excessive ash</b>                                                    |
| CABS-SE-<br>Shallow-8  | <b>n/a due to excessive ash</b>                                                   | <b>n/a due to excessive ash</b>                                                    |
| CABS-SE-<br>Shallow-9  | <b>n/a due to excessive ash</b>                                                   | <b>n/a due to excessive ash</b>                                                    |
| CABS-SE-<br>Shallow-10 | <b>n/a due to excessive ash</b>                                                   | <b>n/a due to excessive ash</b>                                                    |
| CABS-SE-<br>Shallow-11 | <b>n/a due to excessive ash</b>                                                   | <b>n/a due to excessive ash</b>                                                    |
| CABS-SE-<br>Shallow-12 | <b>n/a due to excessive ash</b>                                                   | <b>n/a due to excessive ash</b>                                                    |
| CABS-SE-<br>Shallow-13 | <b>n/a due to excessive ash</b>                                                   | <b>n/a due to excessive ash</b>                                                    |
| CABS-SE-<br>Shallow-14 | <b>n/a due to excessive ash</b>                                                   | <b>n/a due to excessive ash</b>                                                    |
| CABS-SE-<br>Shallow-15 | <b>n/a due to excessive ash</b>                                                   | <b>n/a due to excessive ash</b>                                                    |

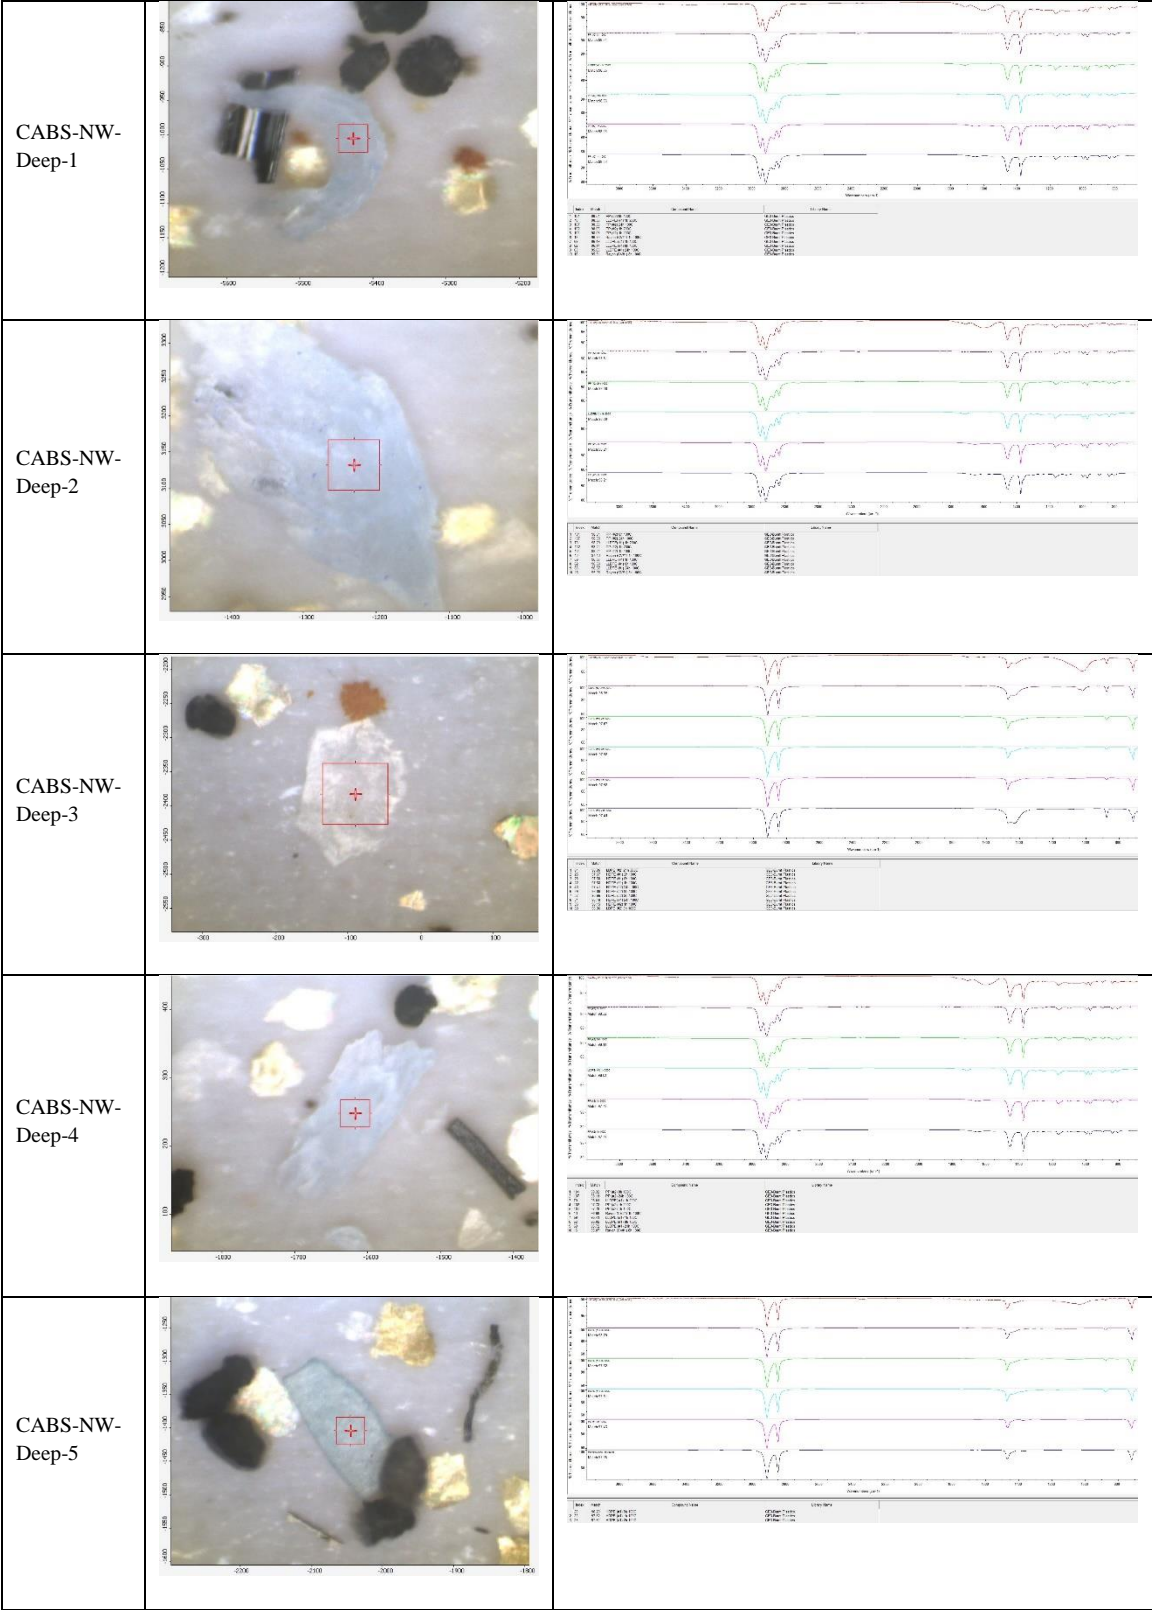

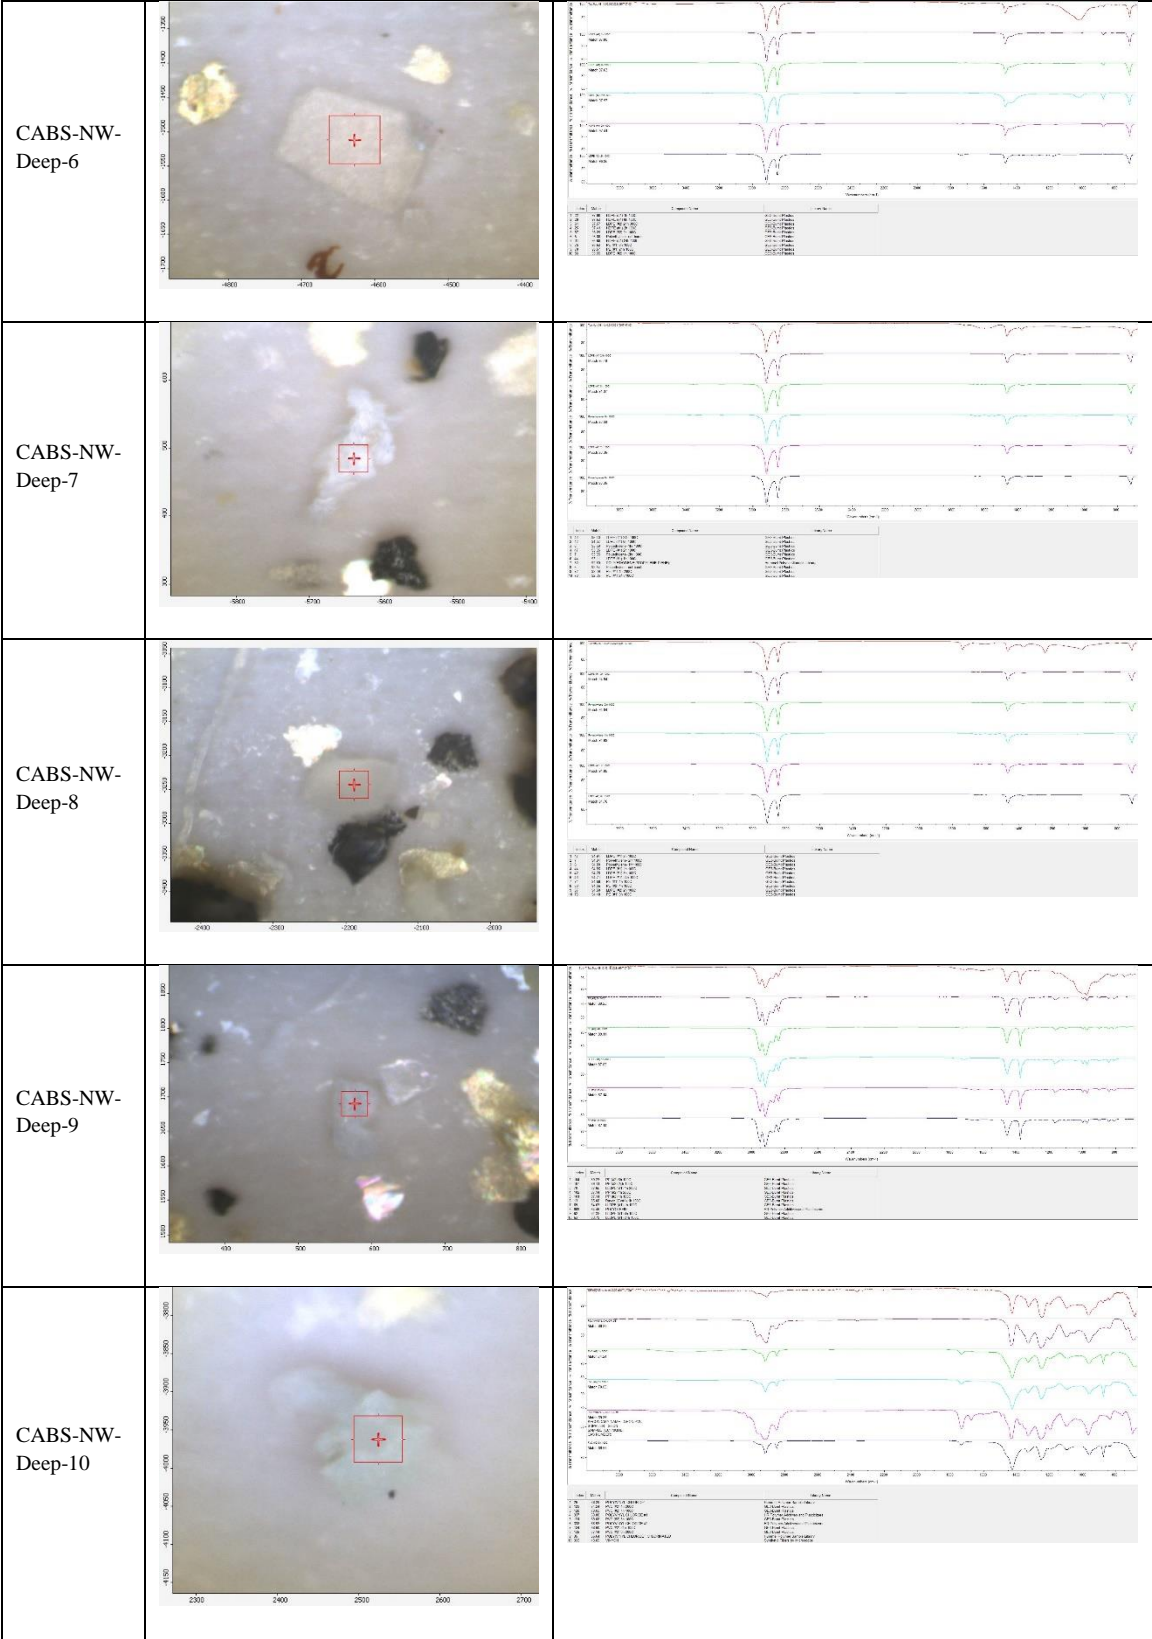

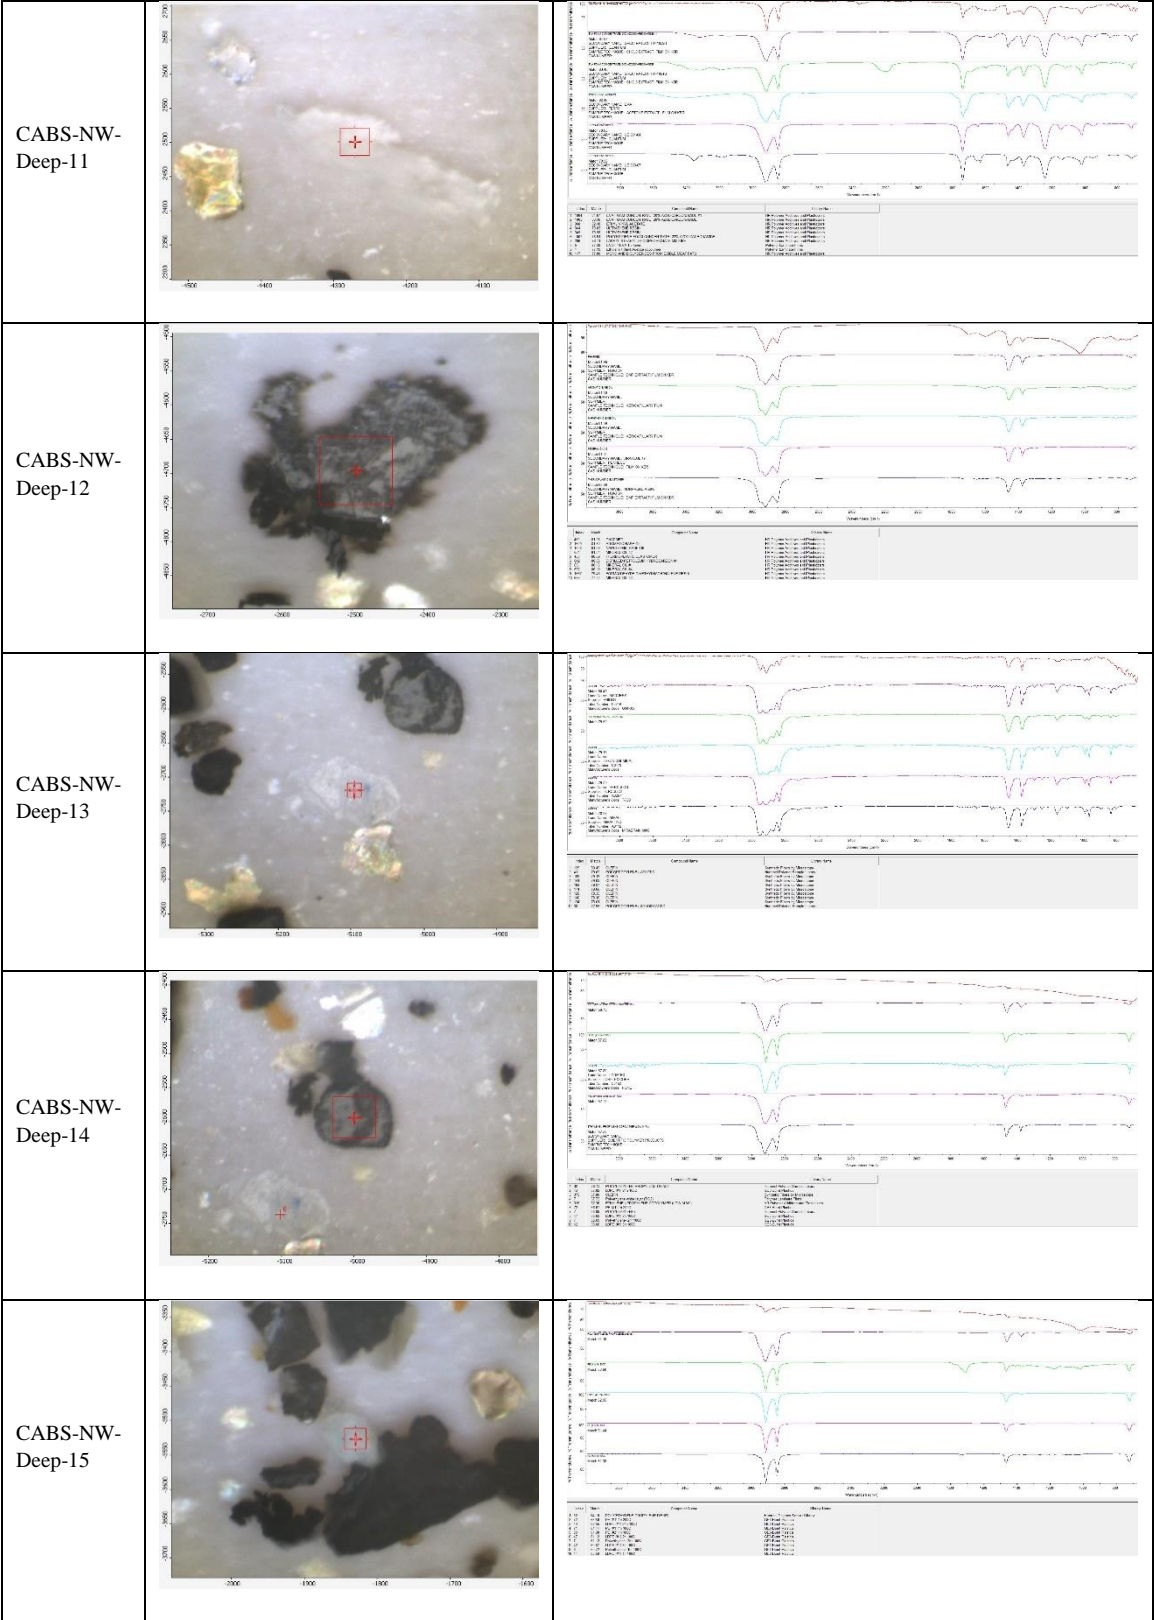



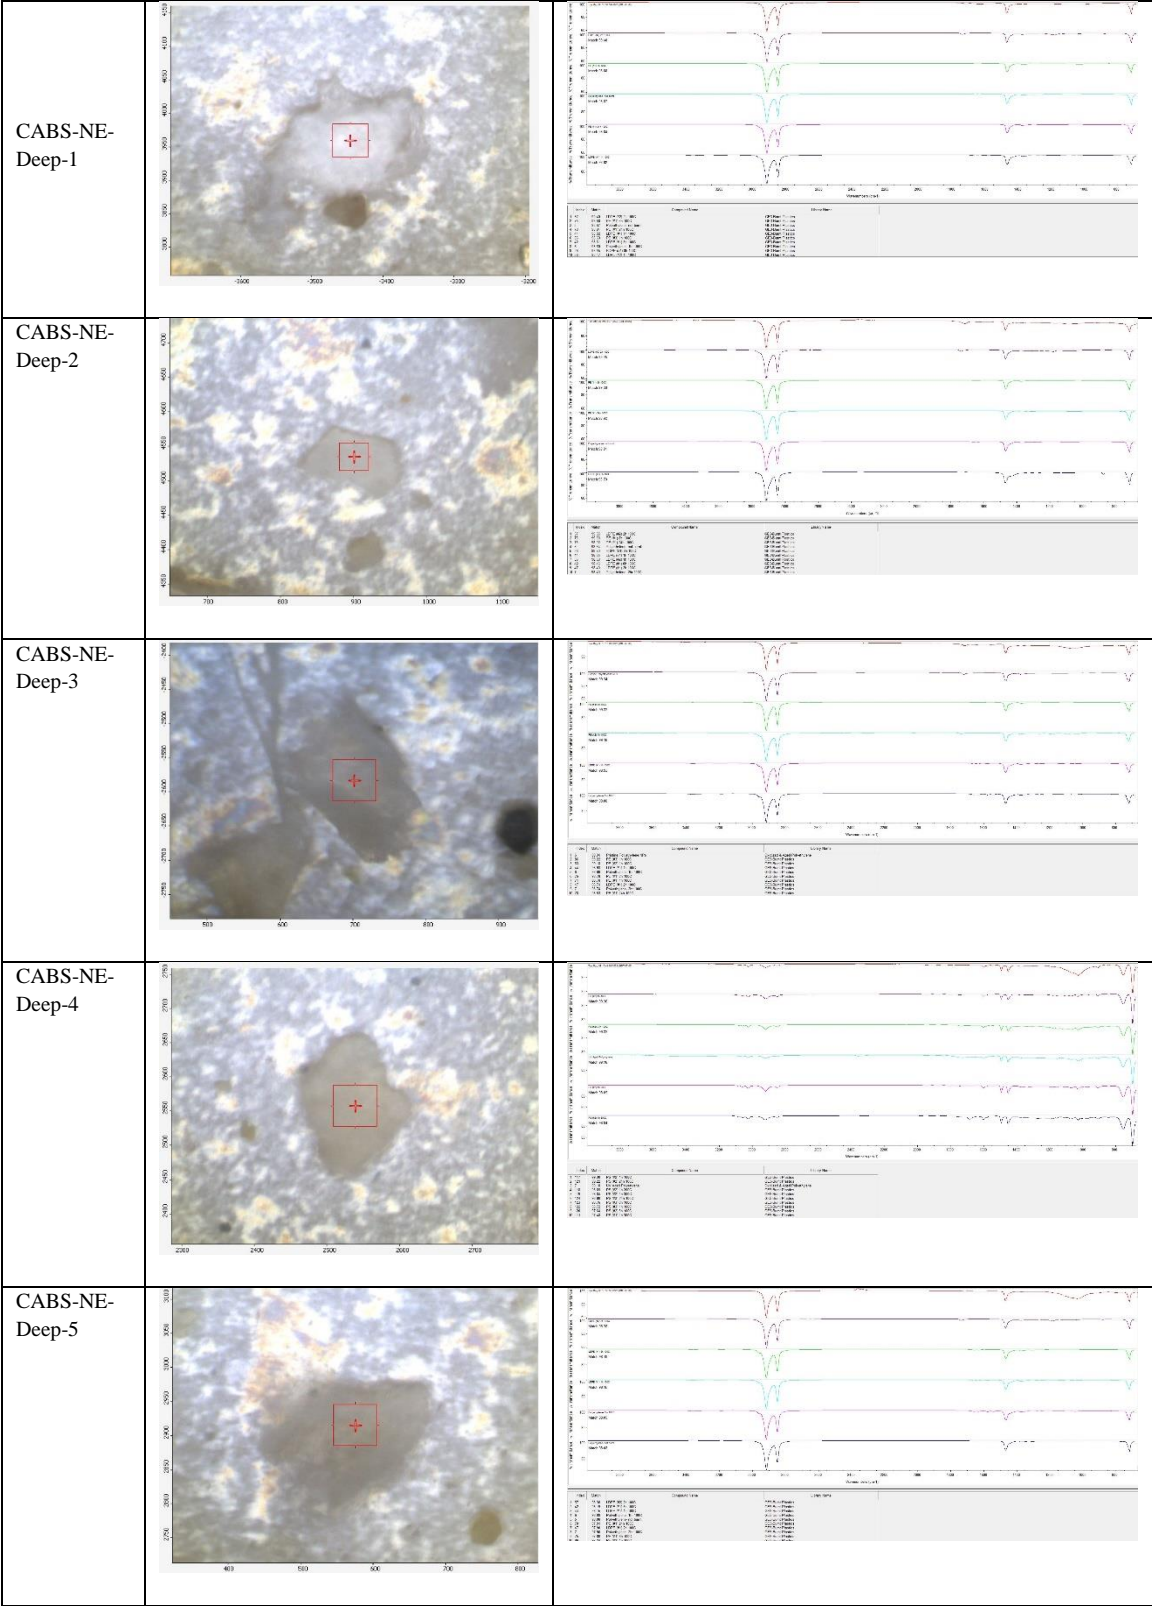

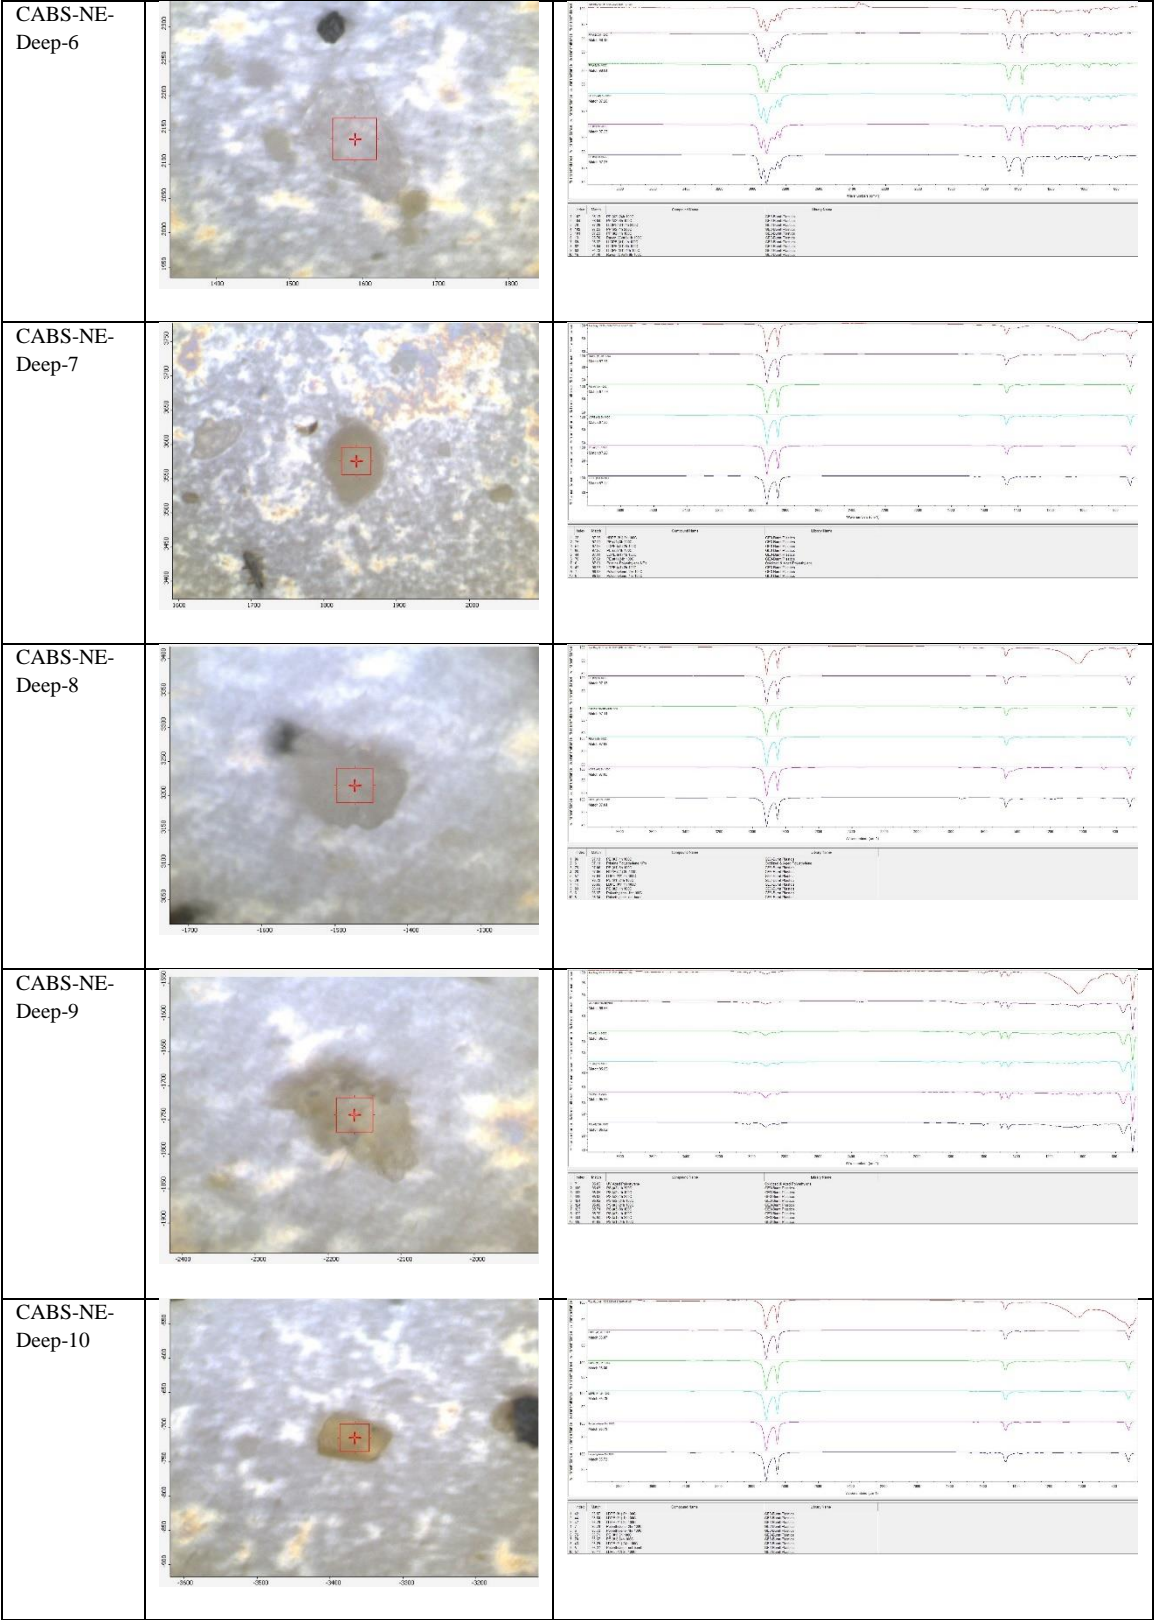

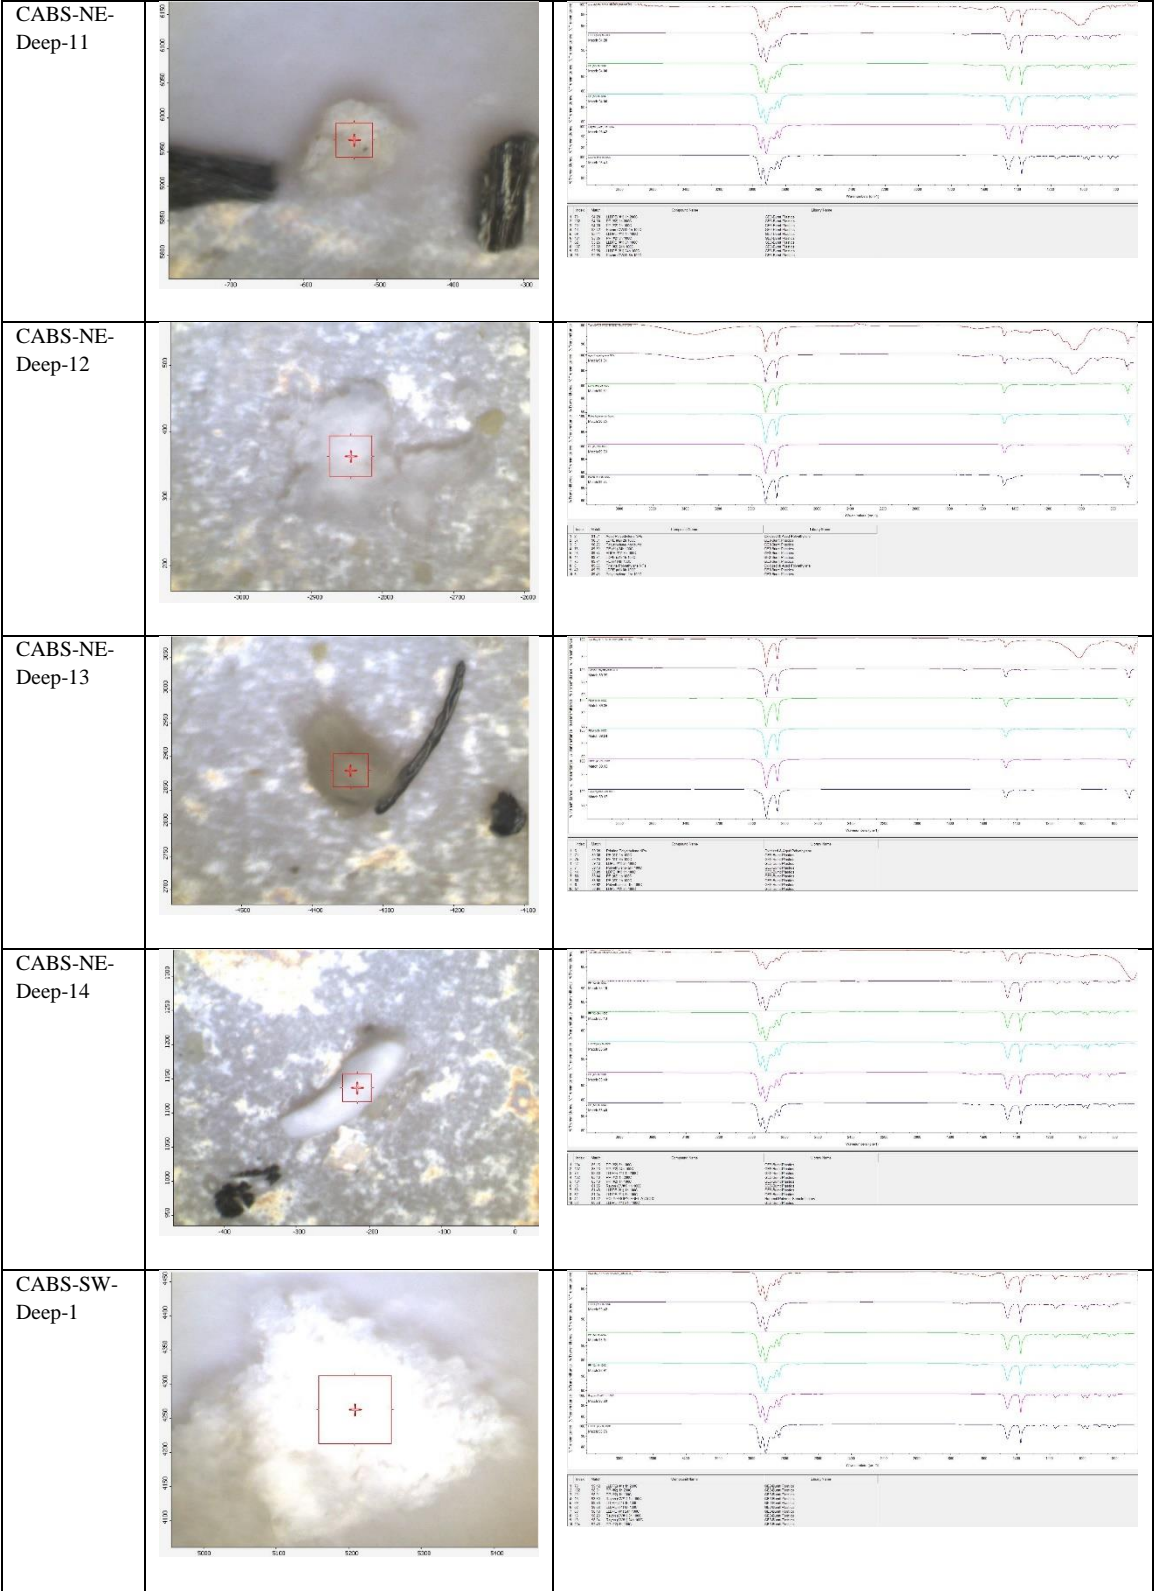

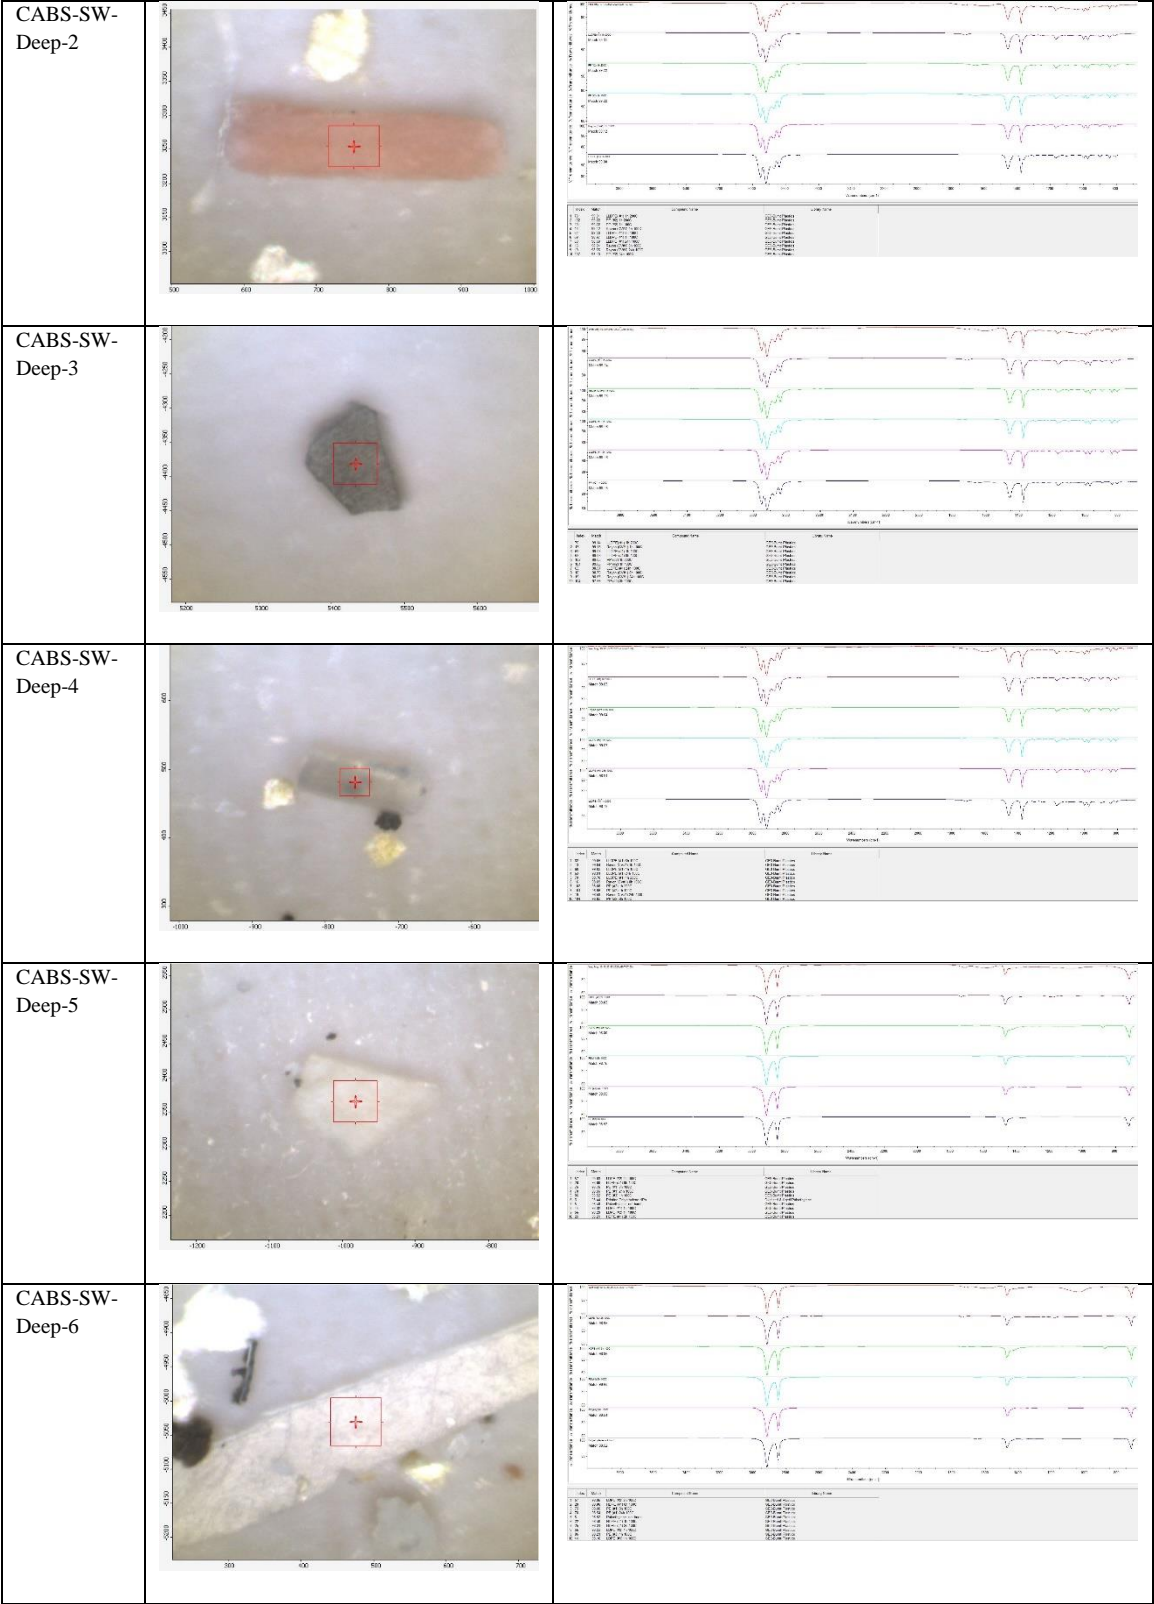

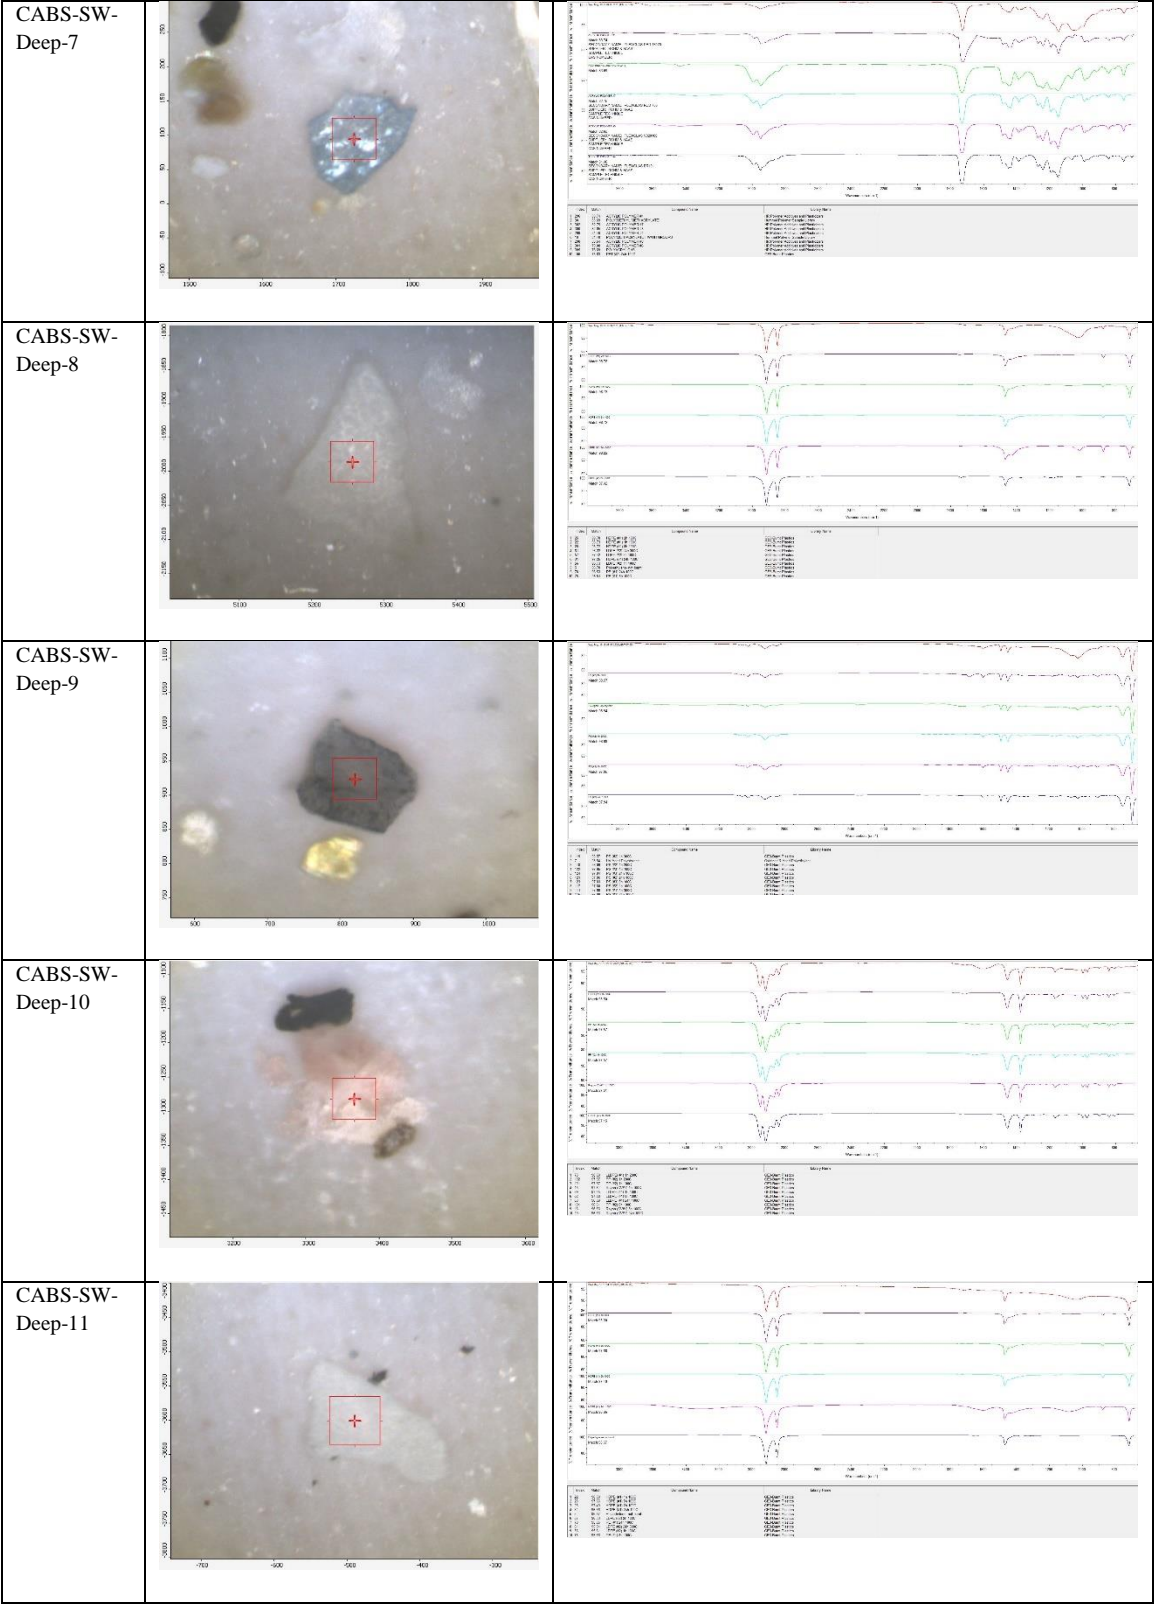

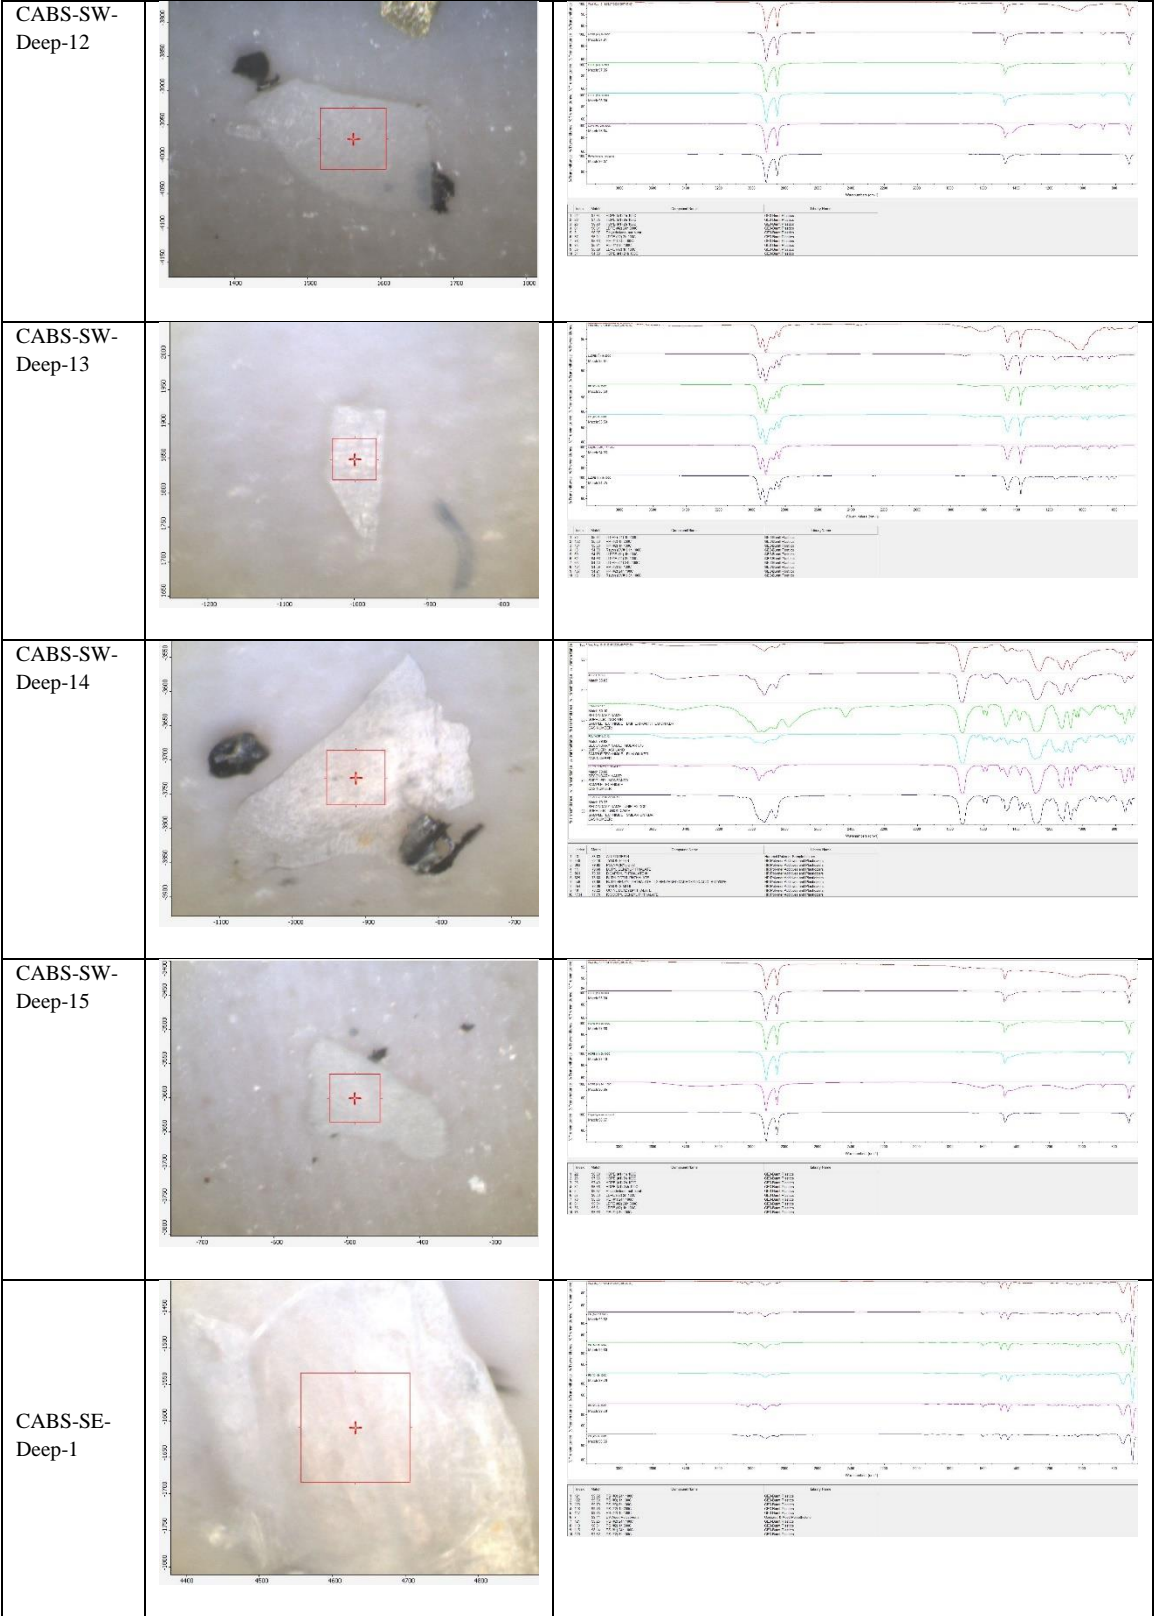

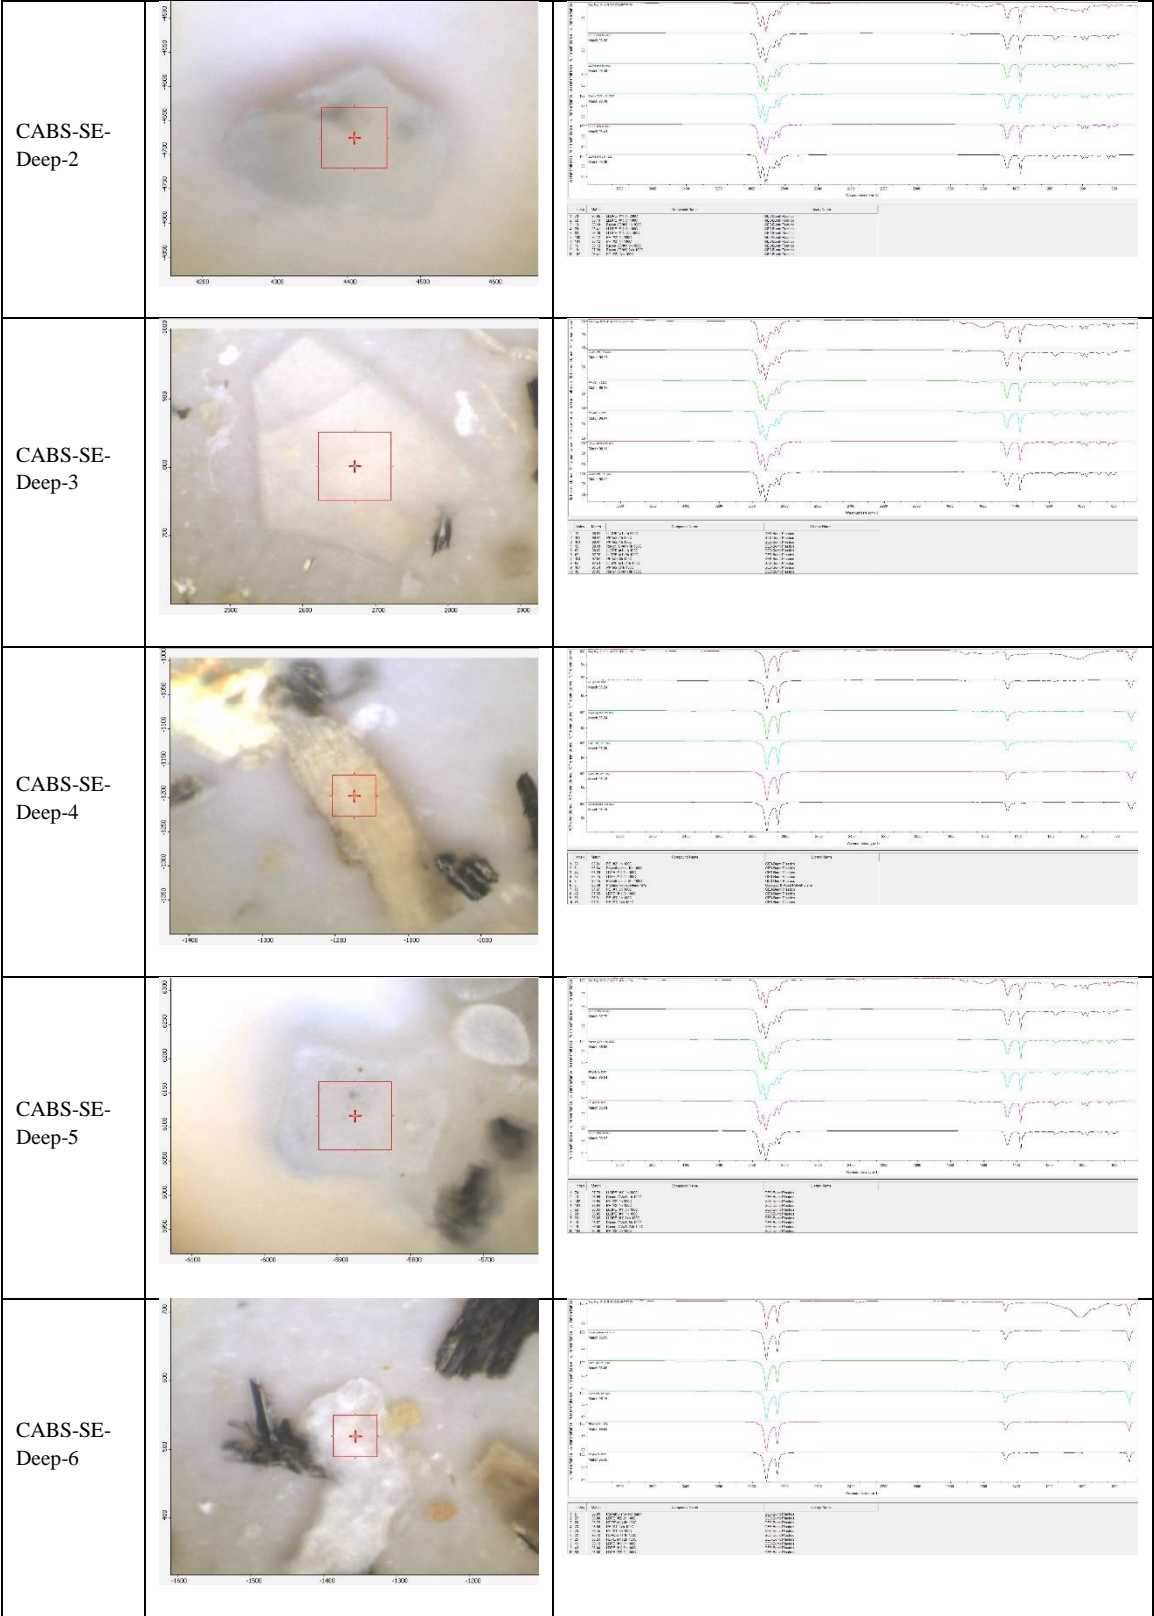

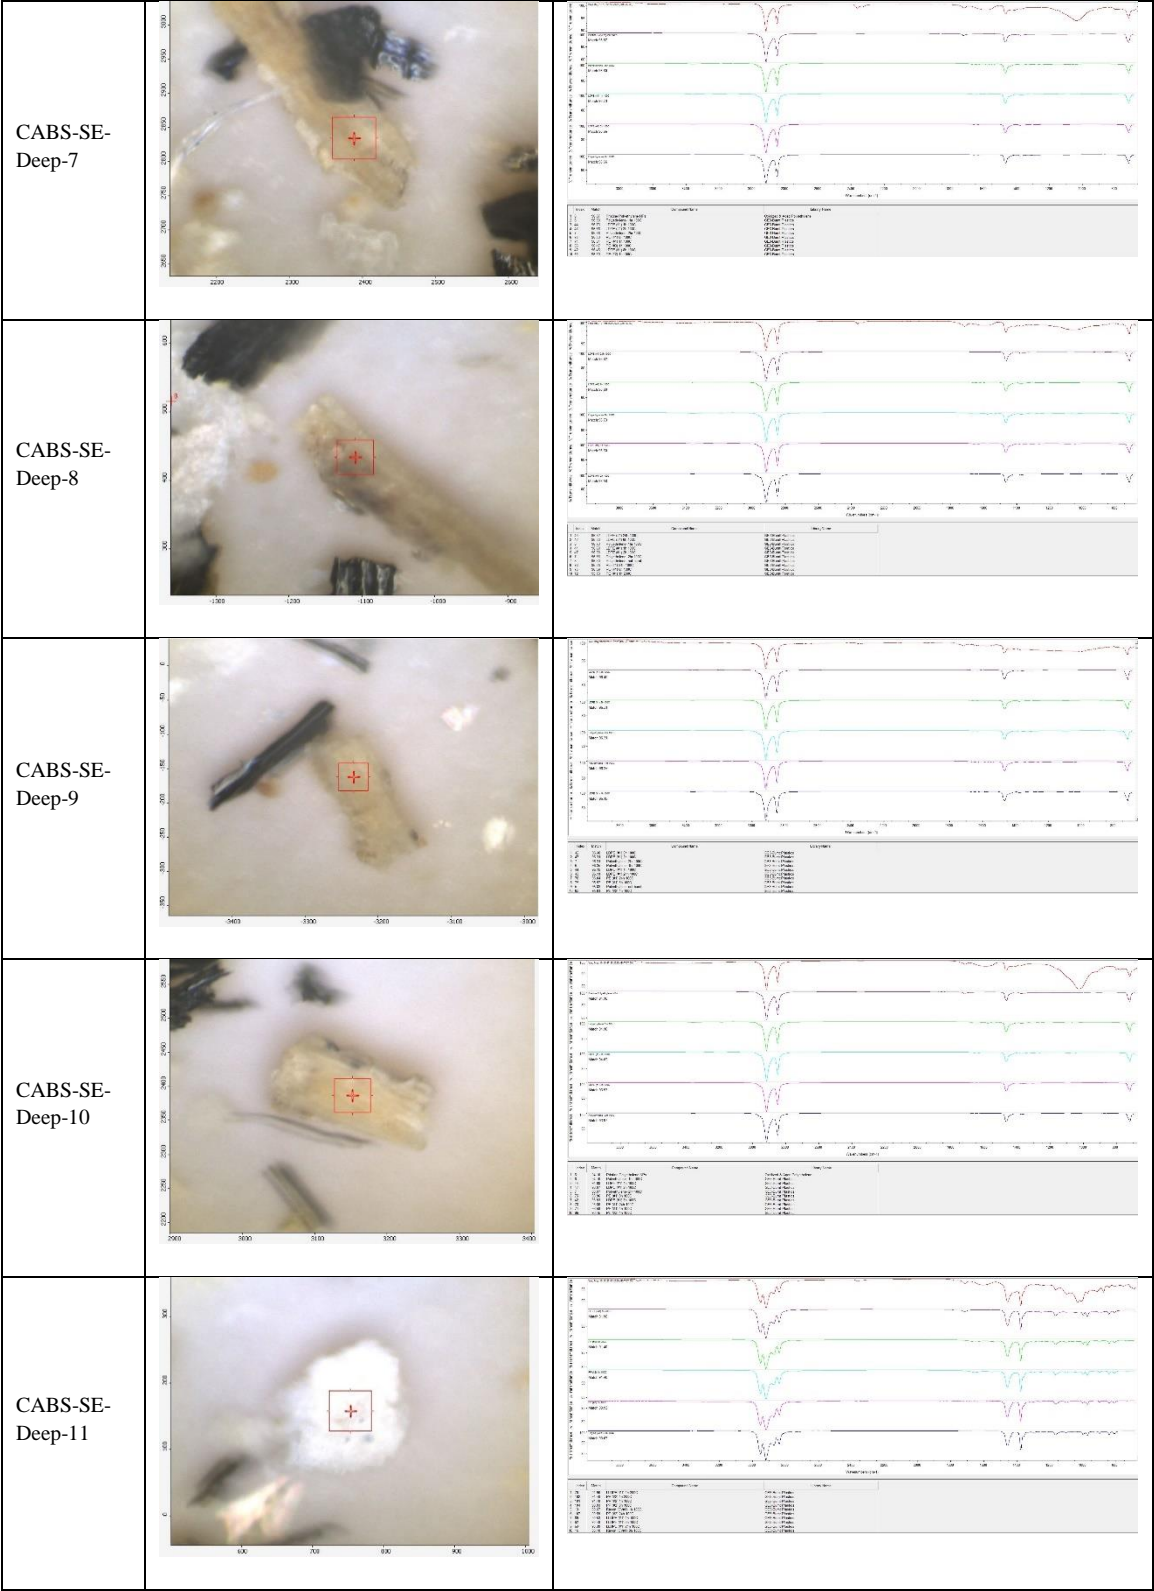



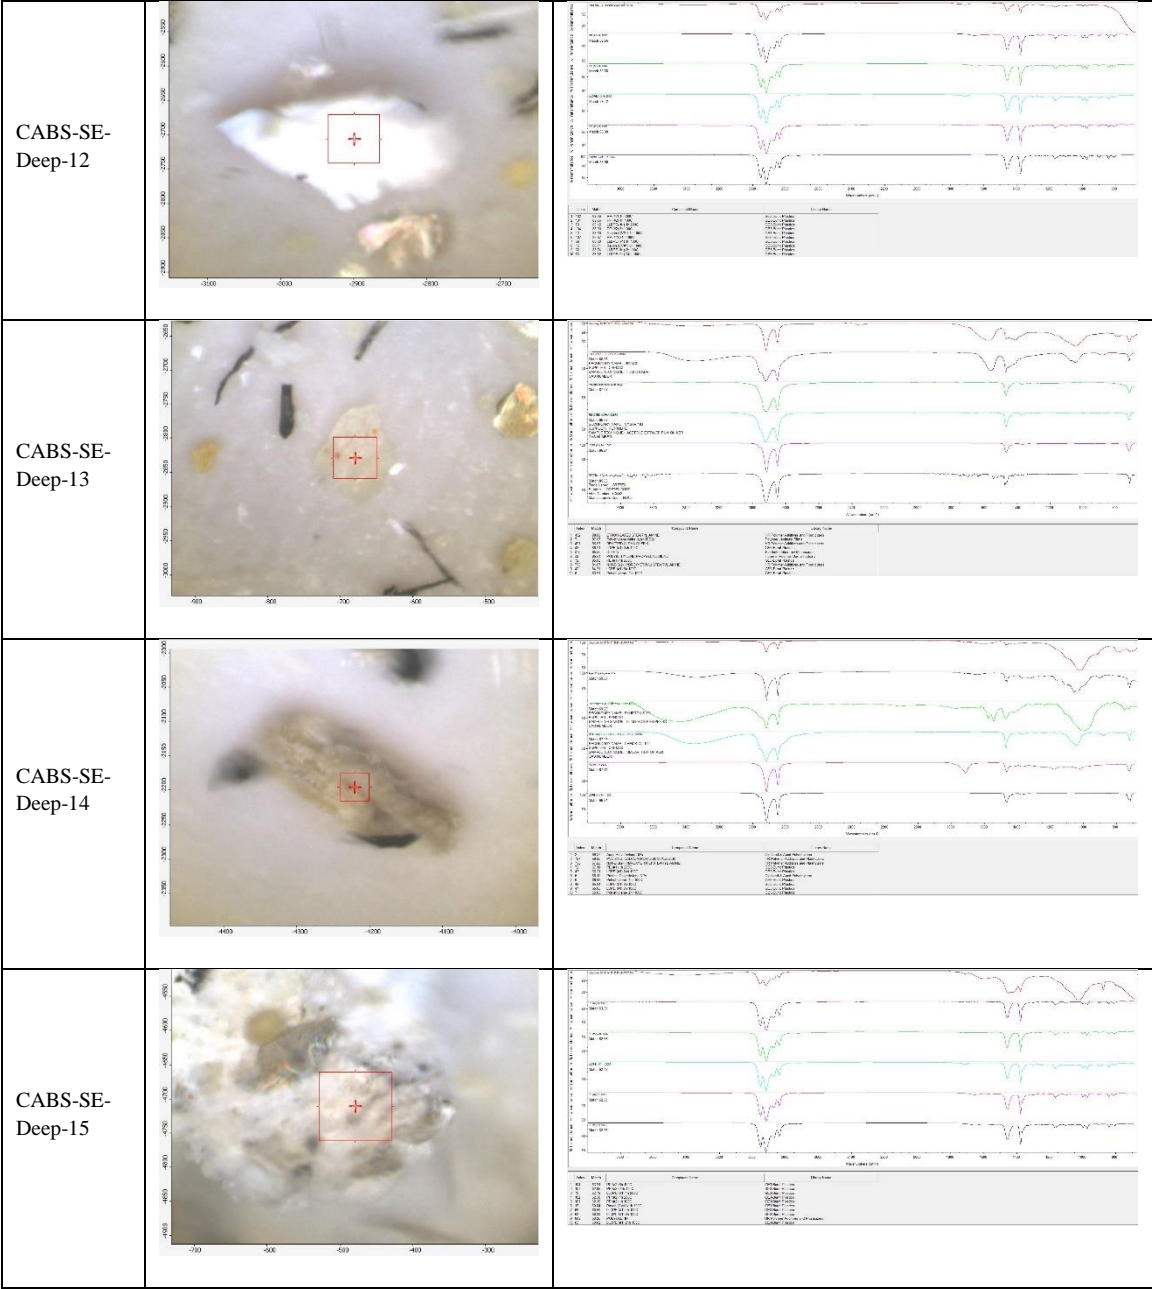

**Table S19: Lodge Grass Dump Site ATR-FTIR Particle and Spectra Images**

|                       |                                                                                     |                                                                                      |
|-----------------------|-------------------------------------------------------------------------------------|--------------------------------------------------------------------------------------|
| <p>LG-N-Shallow-1</p> | 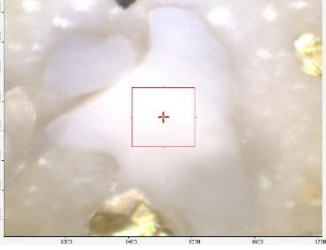   |    |
| <p>LG-N-Shallow-2</p> |    |    |
| <p>LG-N-Shallow-3</p> |   |   |
| <p>LG-N-Shallow-4</p> |  |  |

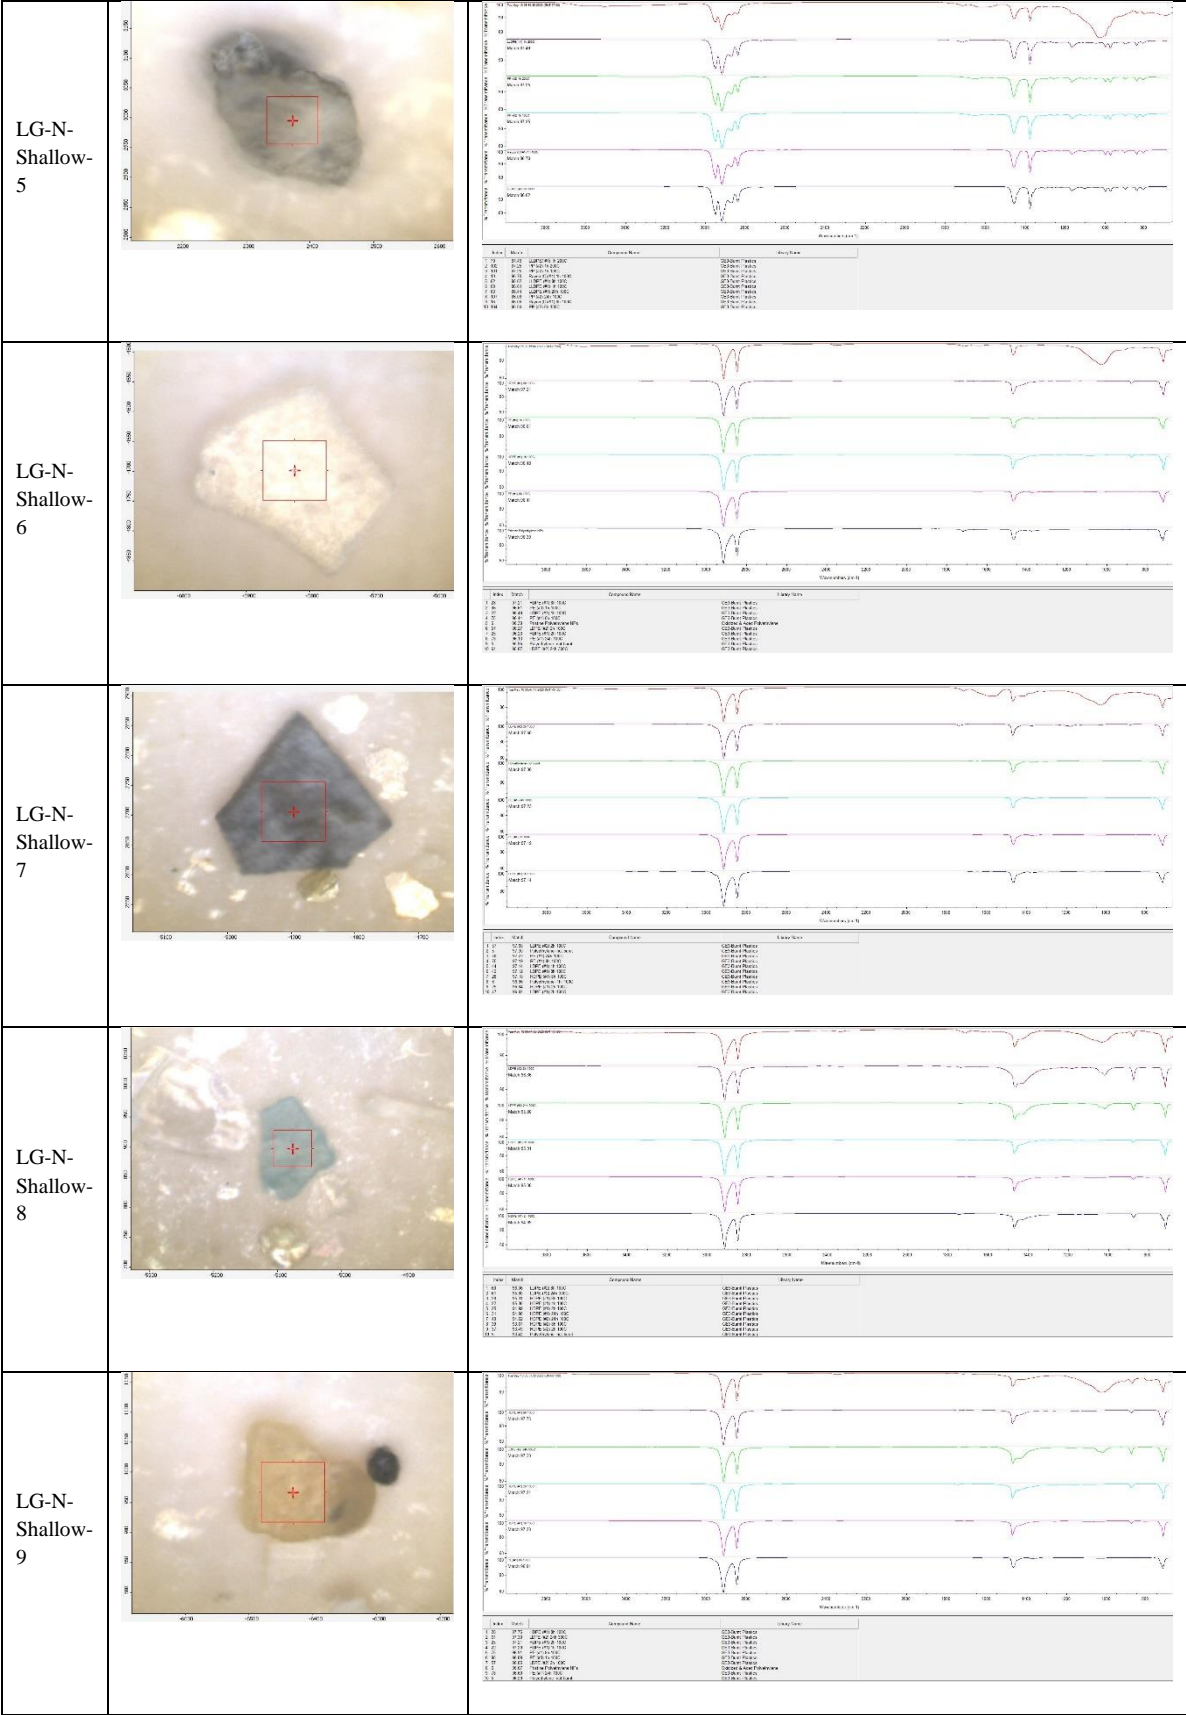

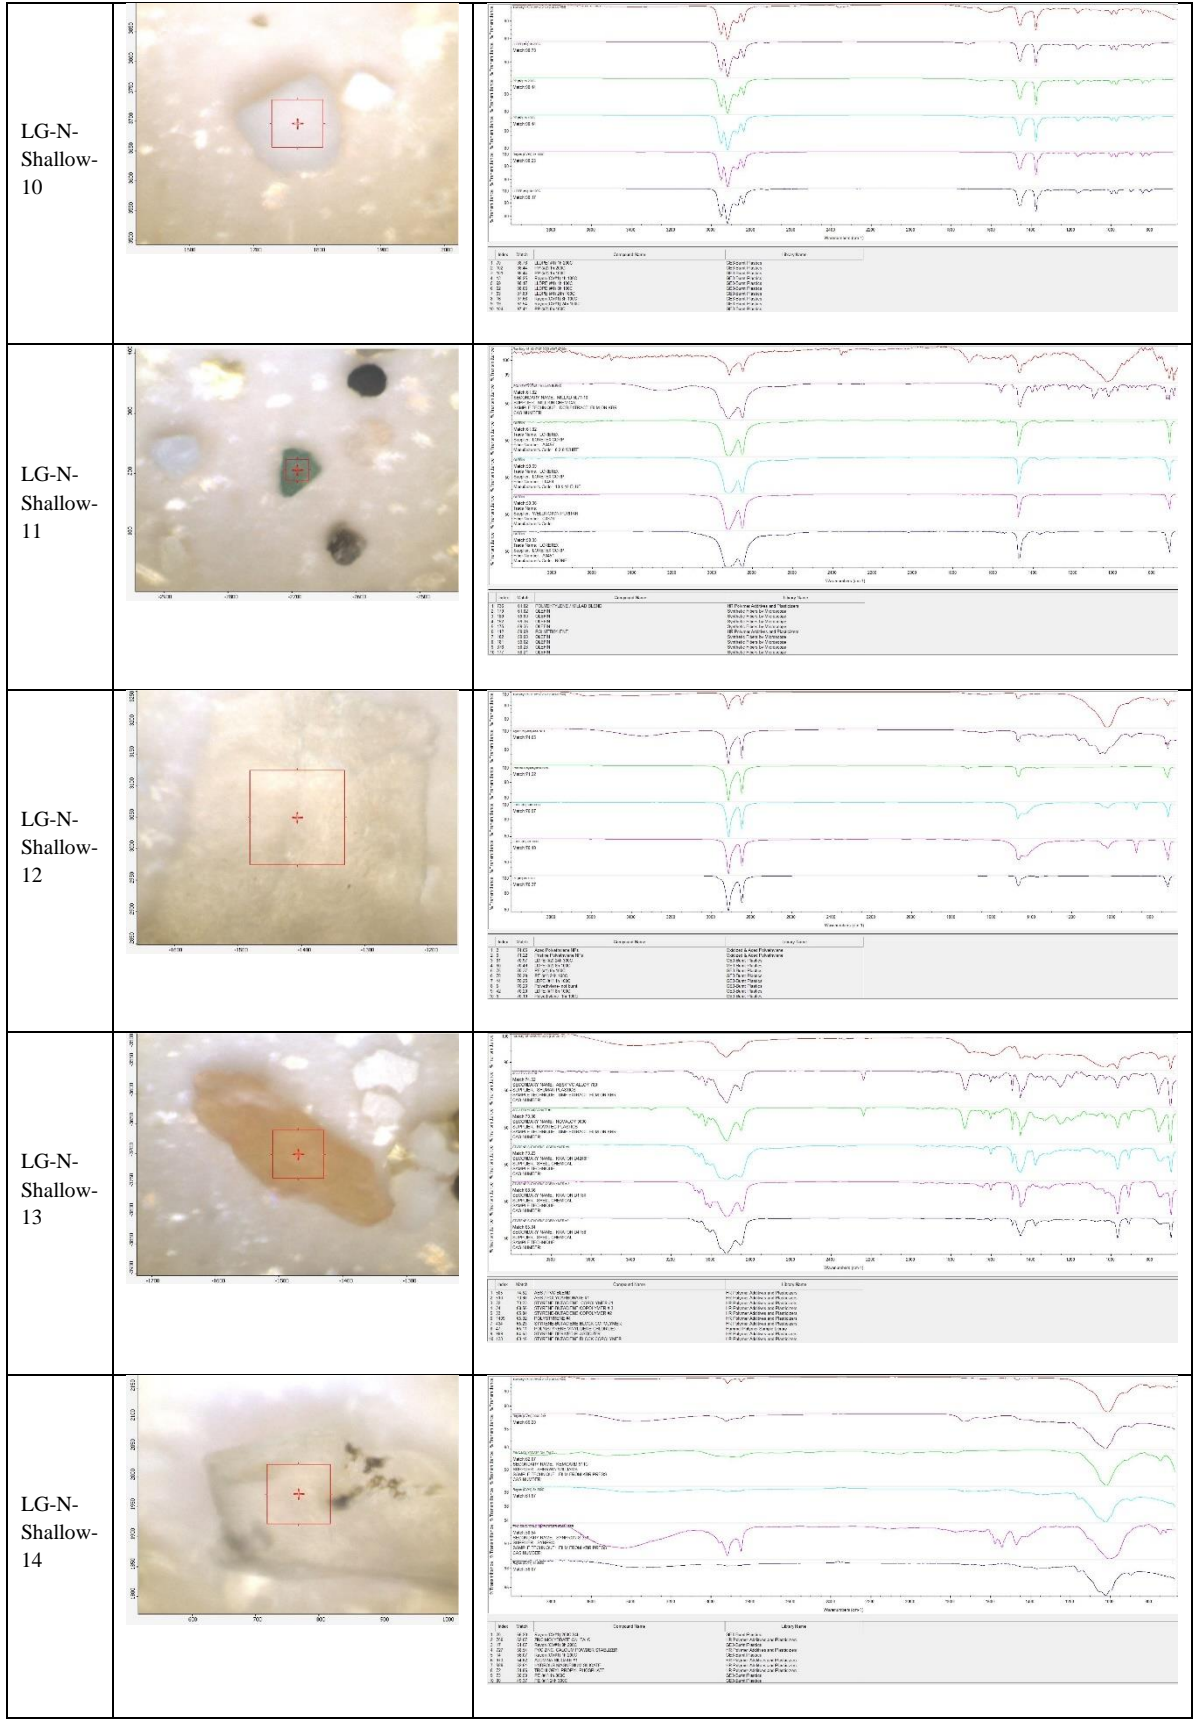

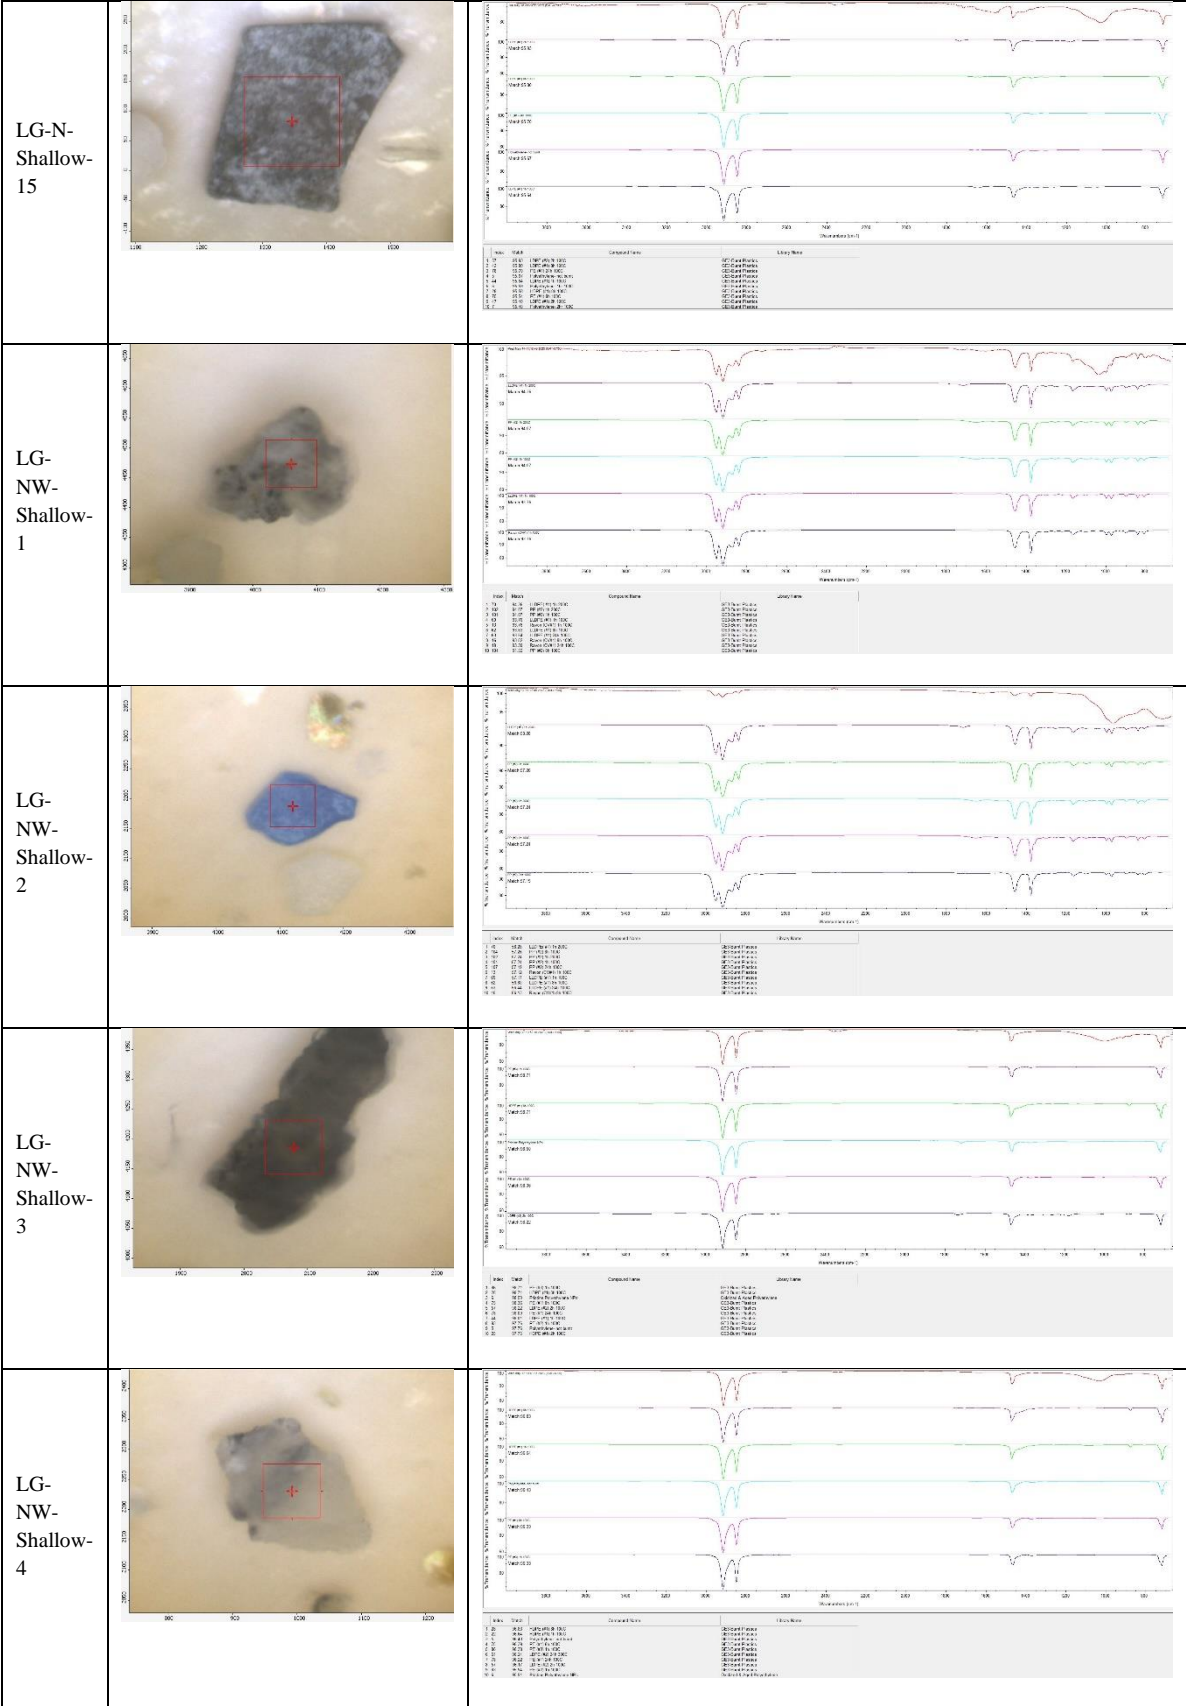



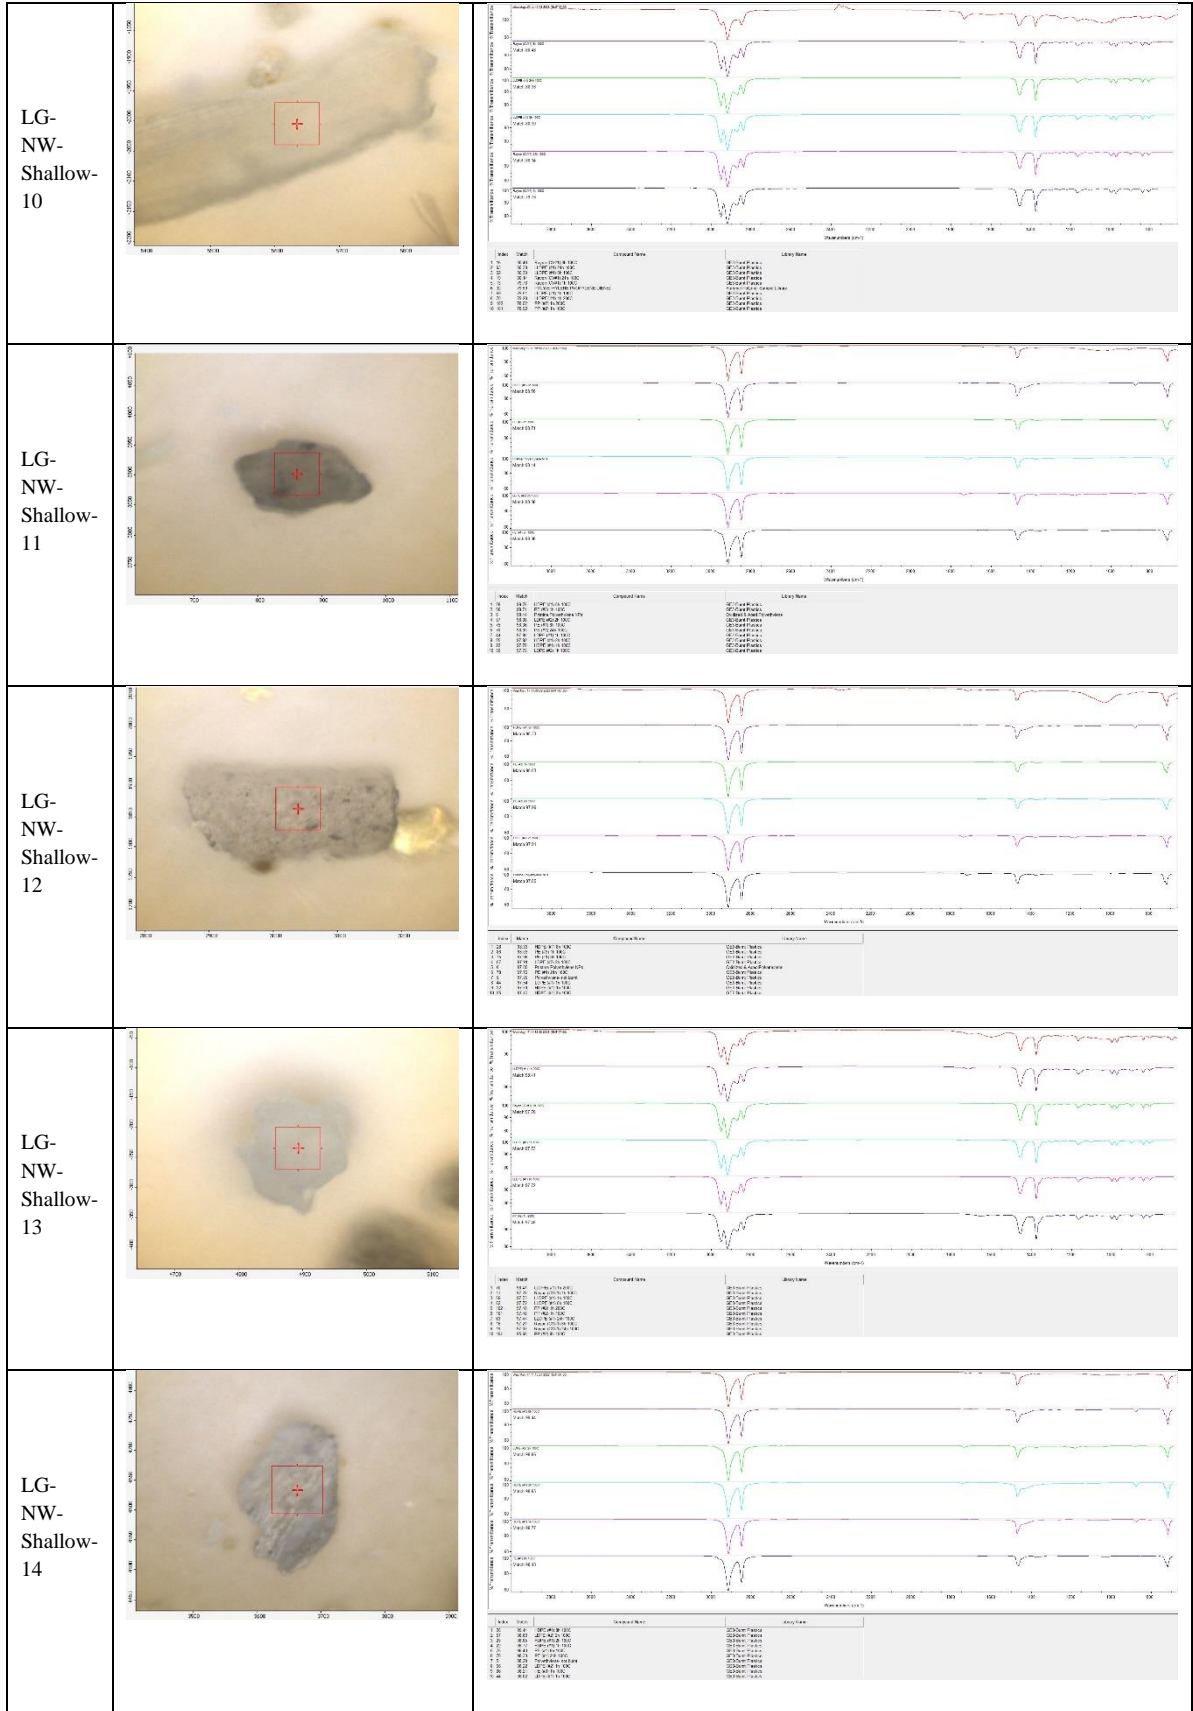

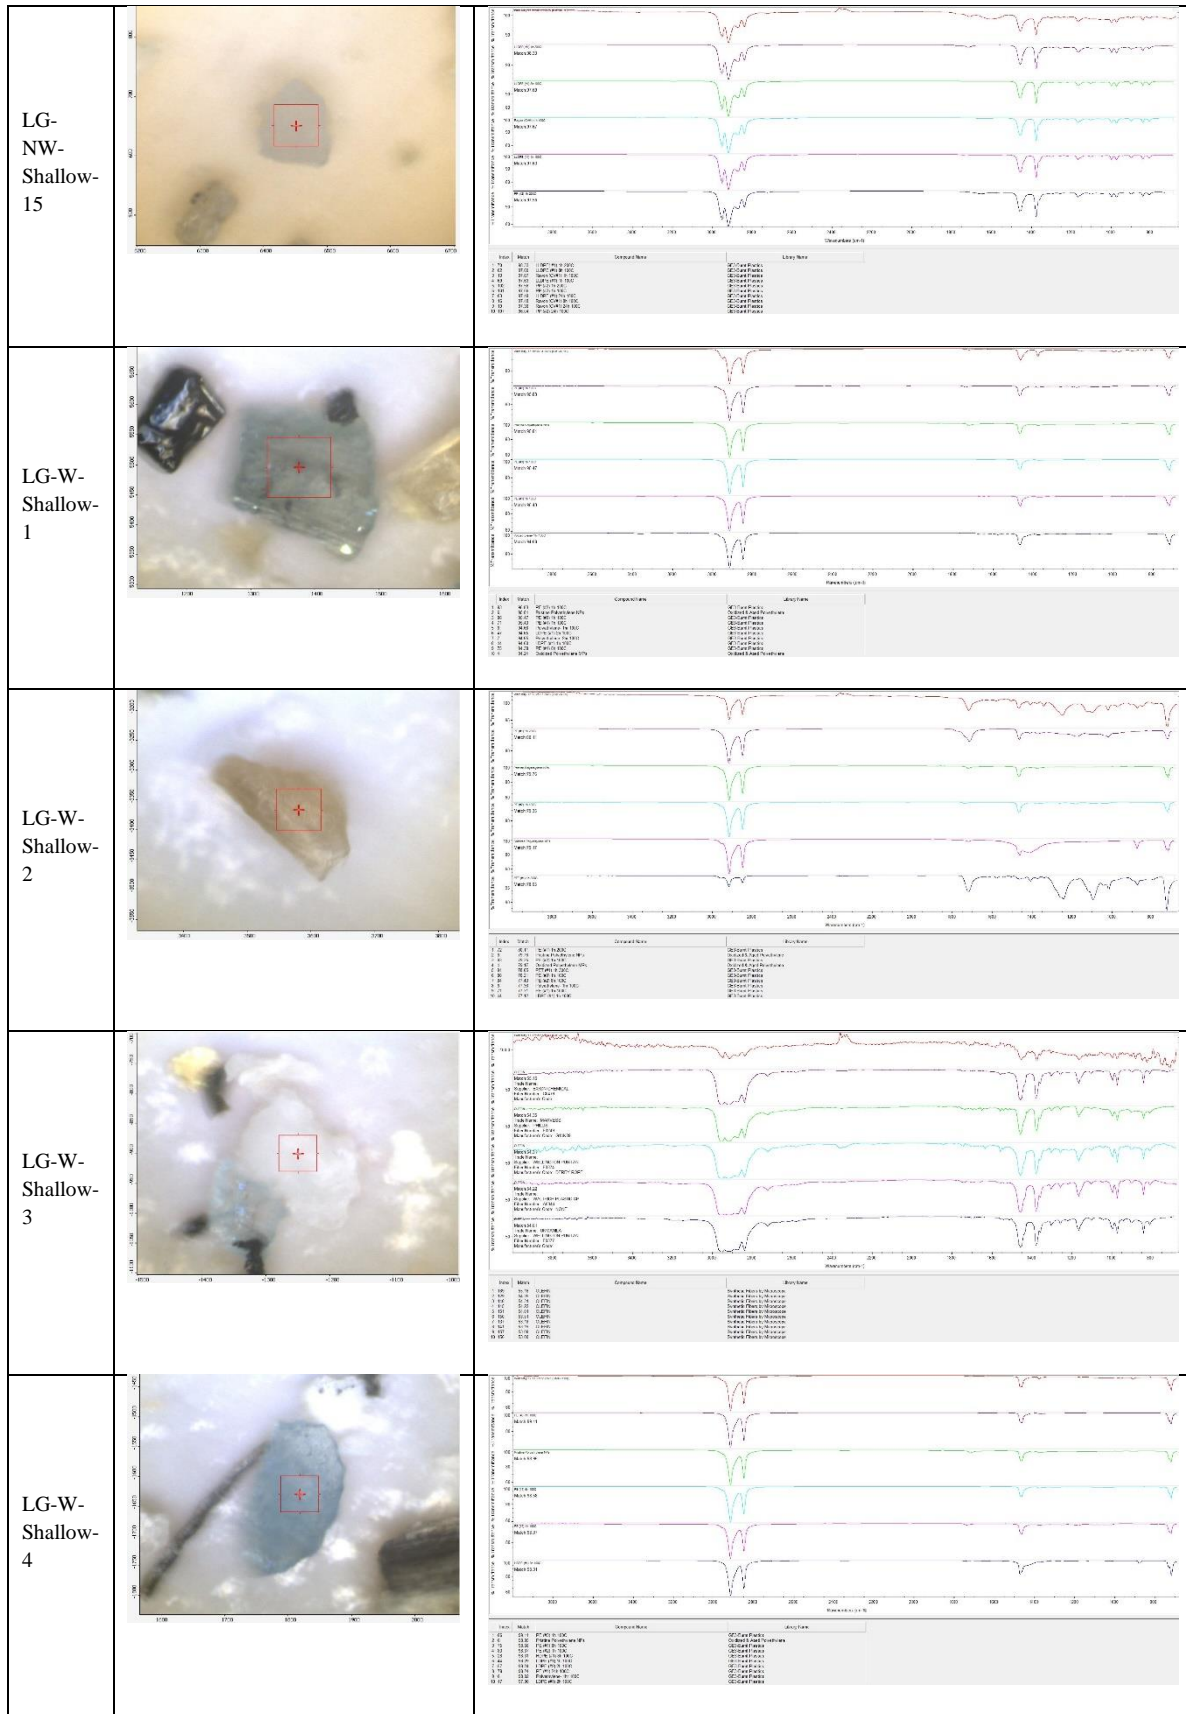



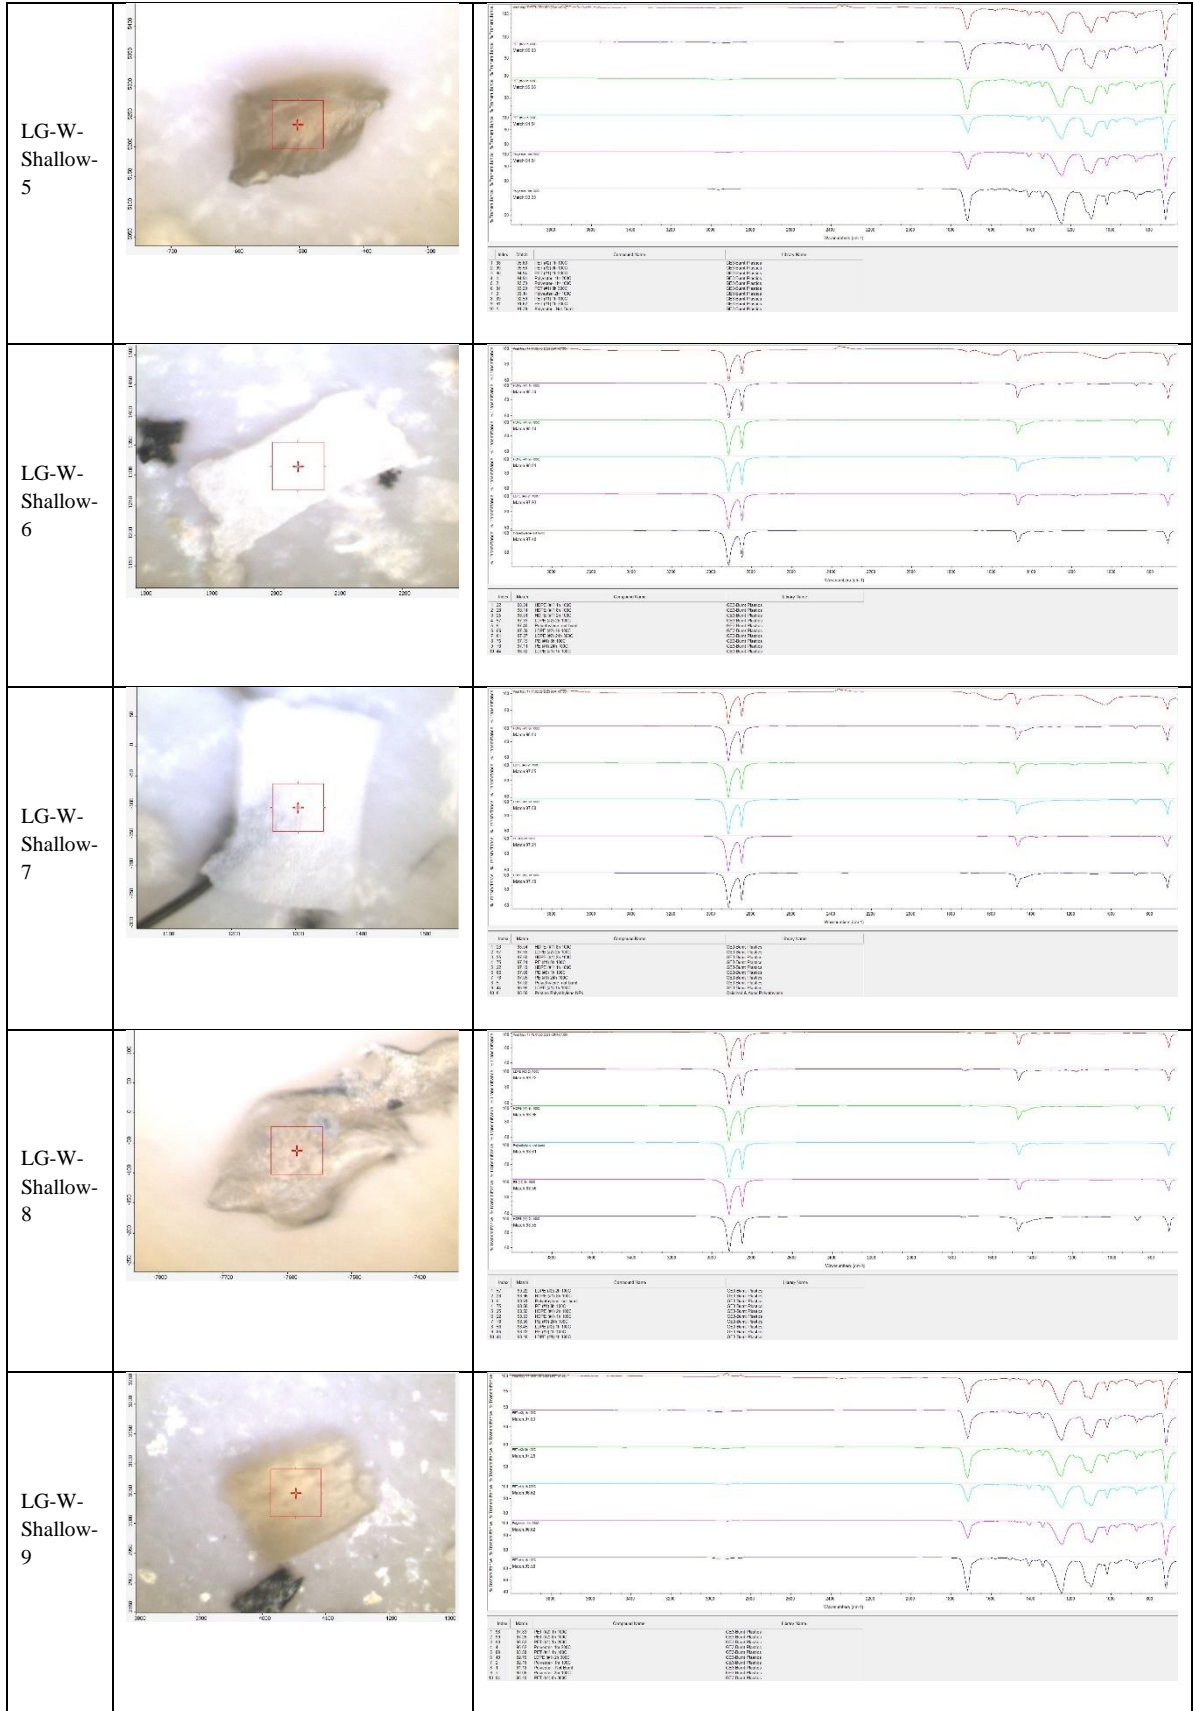

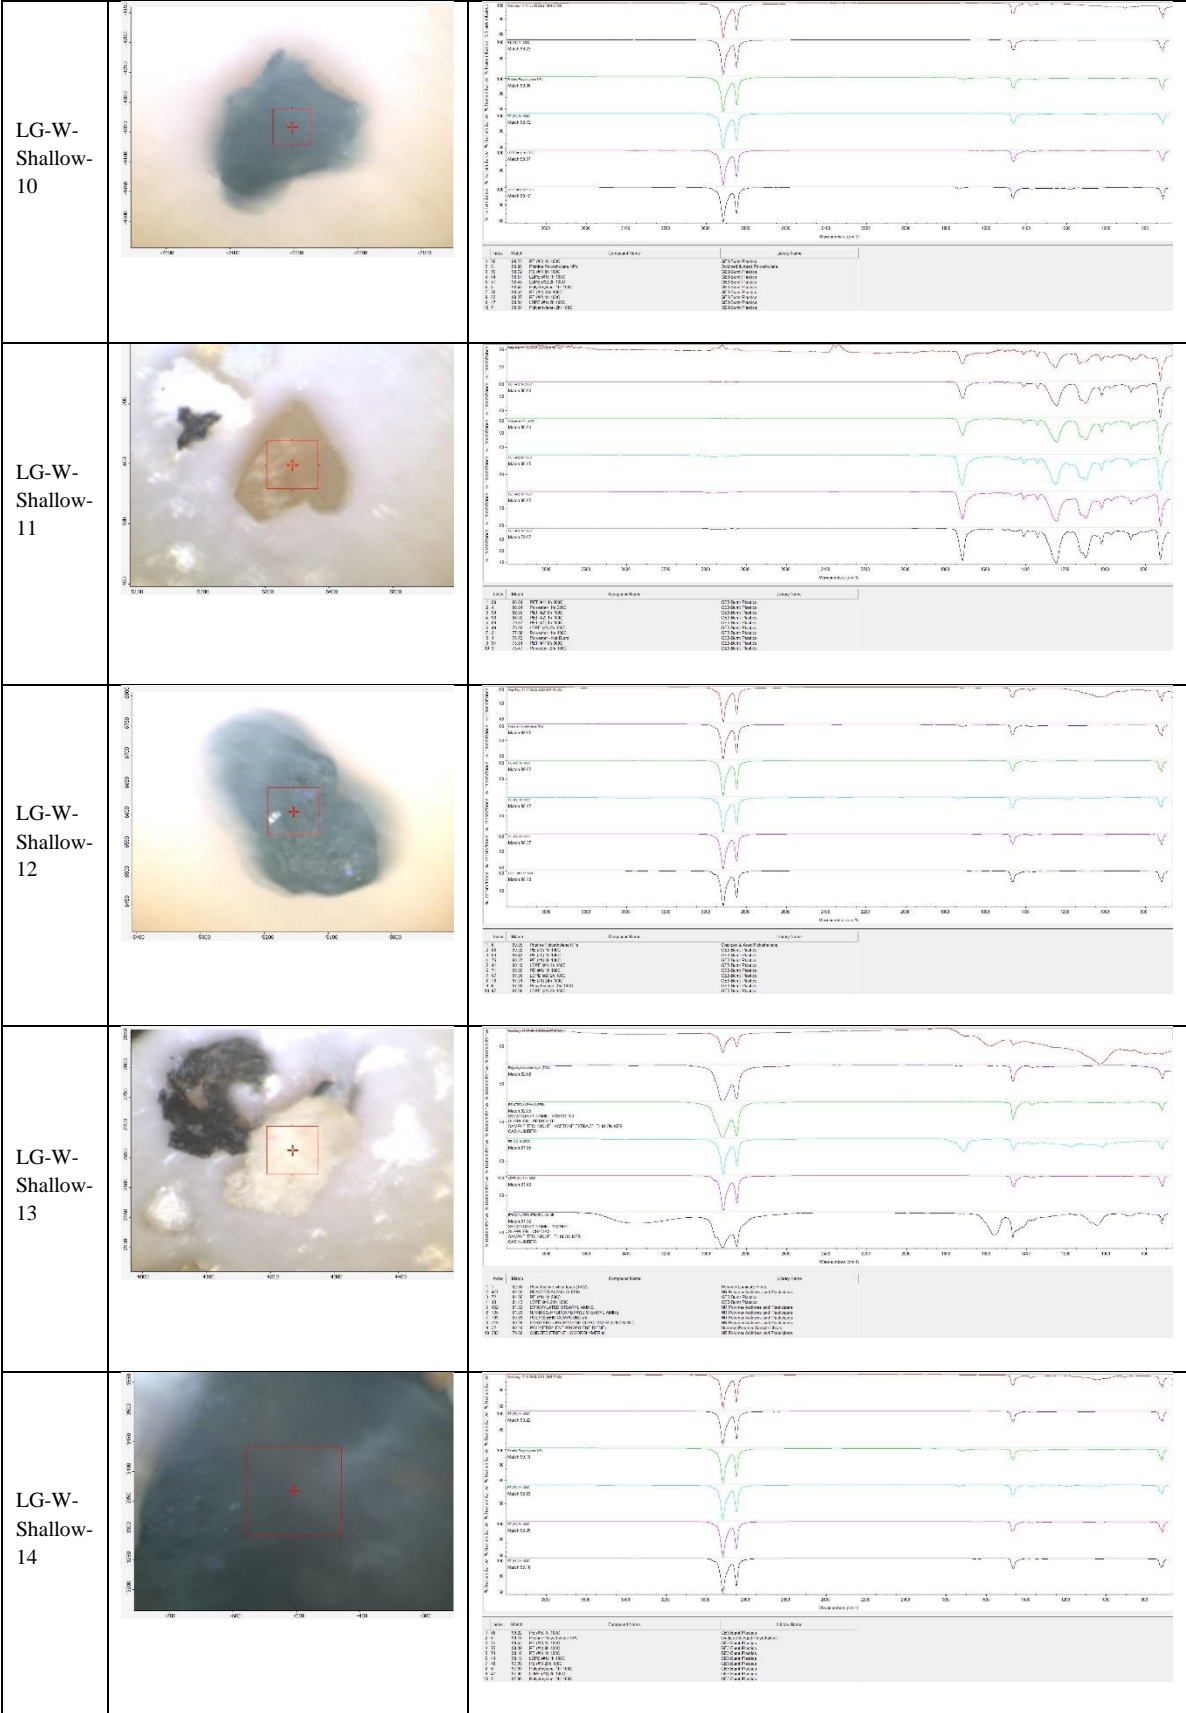

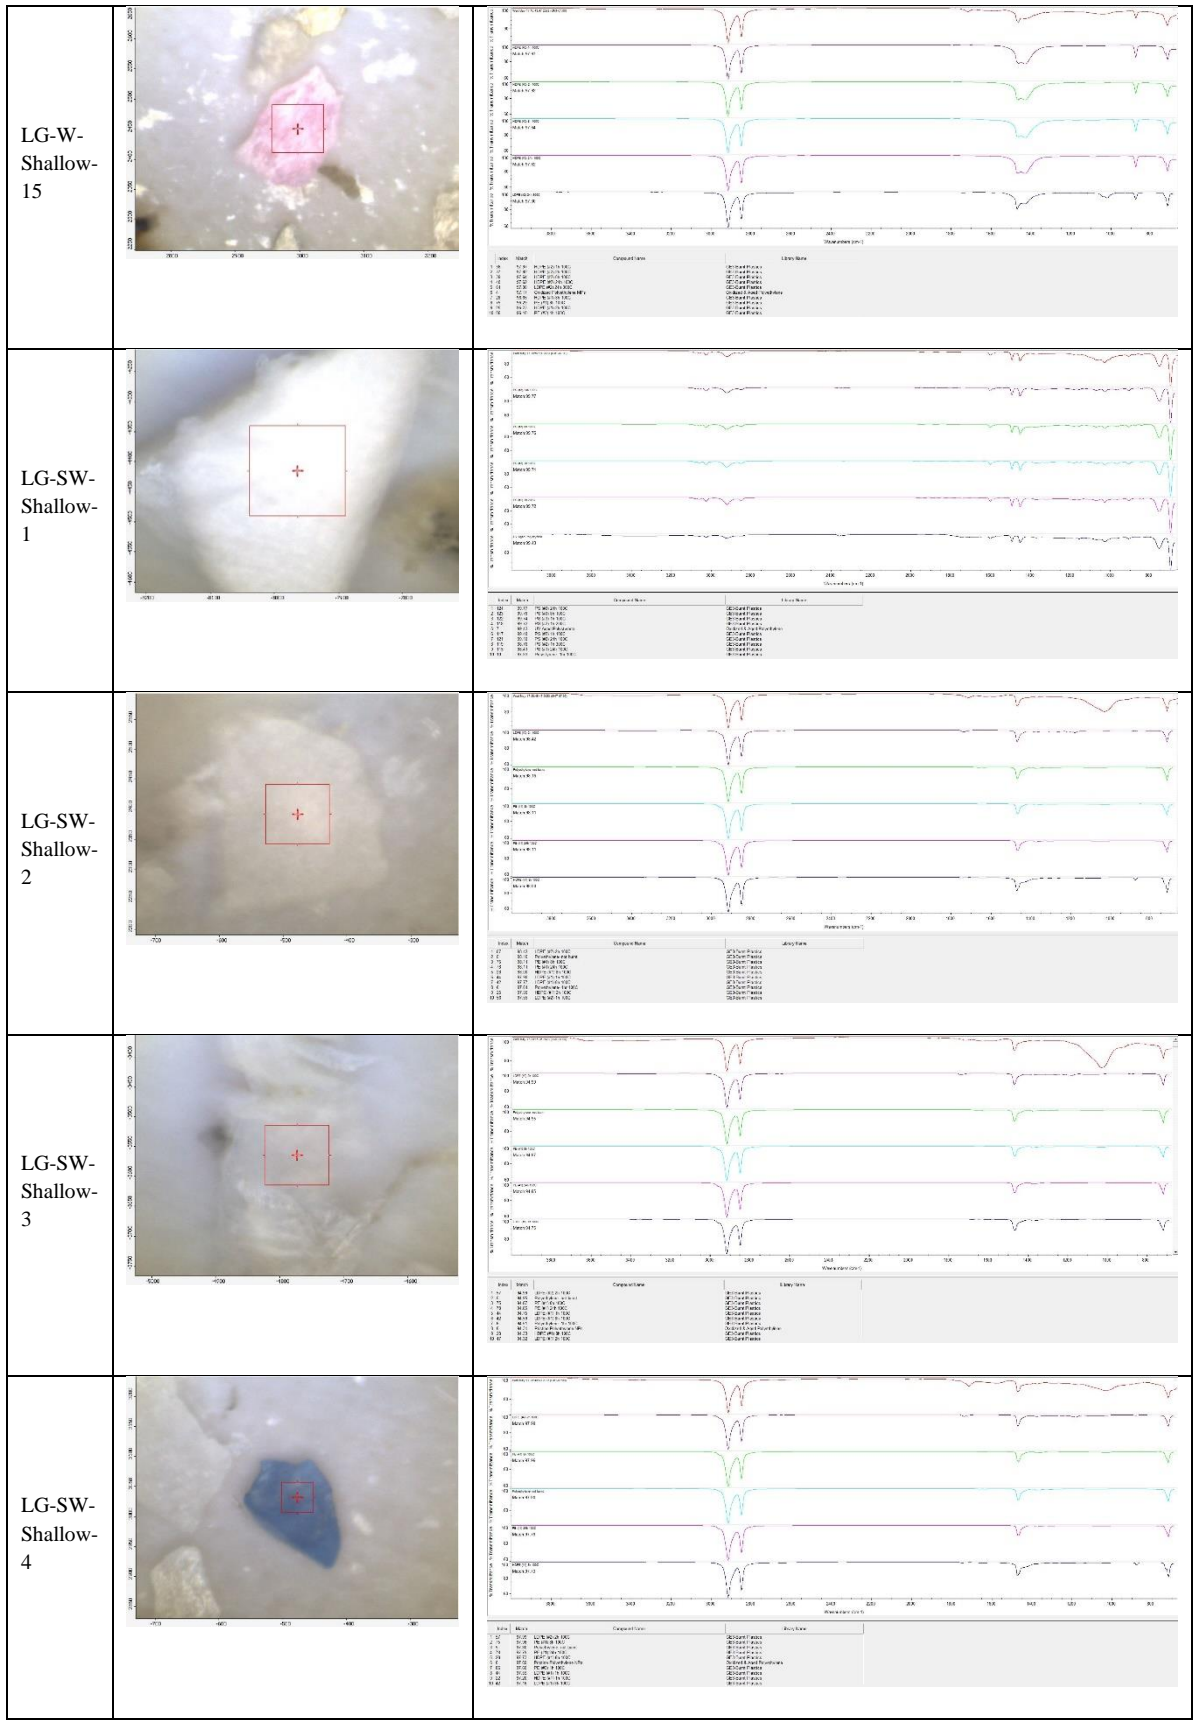

LG-SW-  
Shallow-  
5

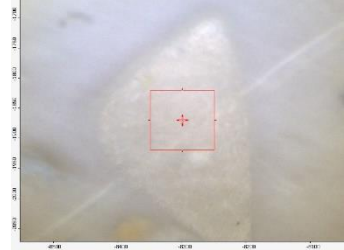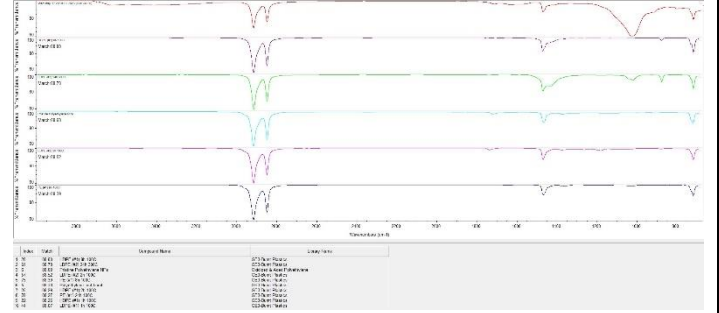

LG-SW-  
Shallow-  
6

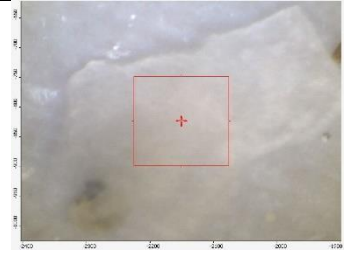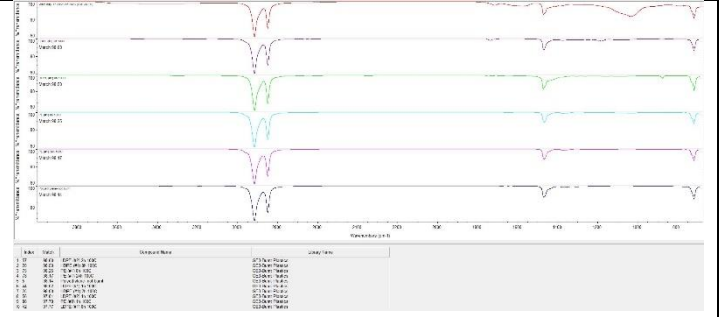

LG-SW-  
Shallow-  
7

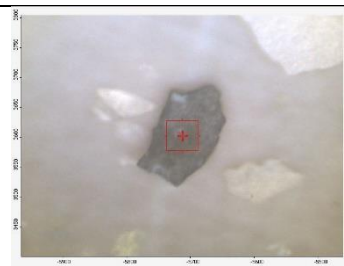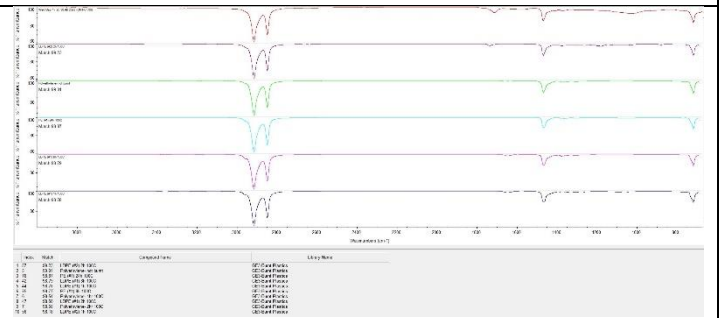

LG-SW-  
Shallow-  
8

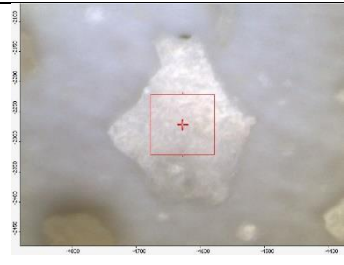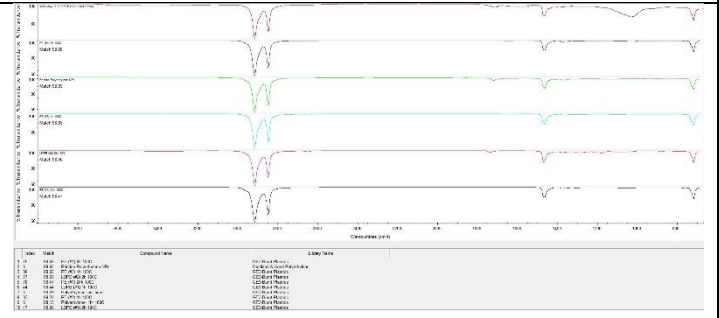

LG-SW-  
Shallow-  
9

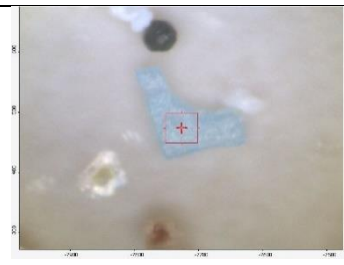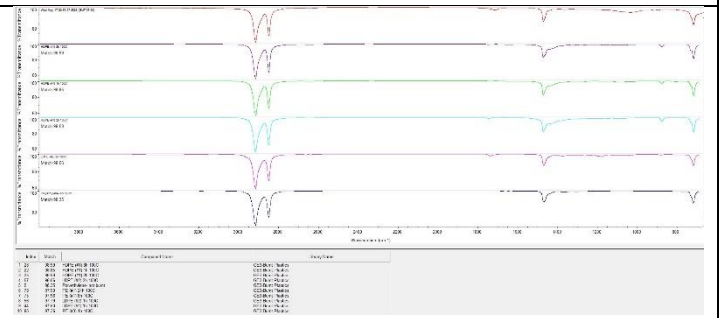

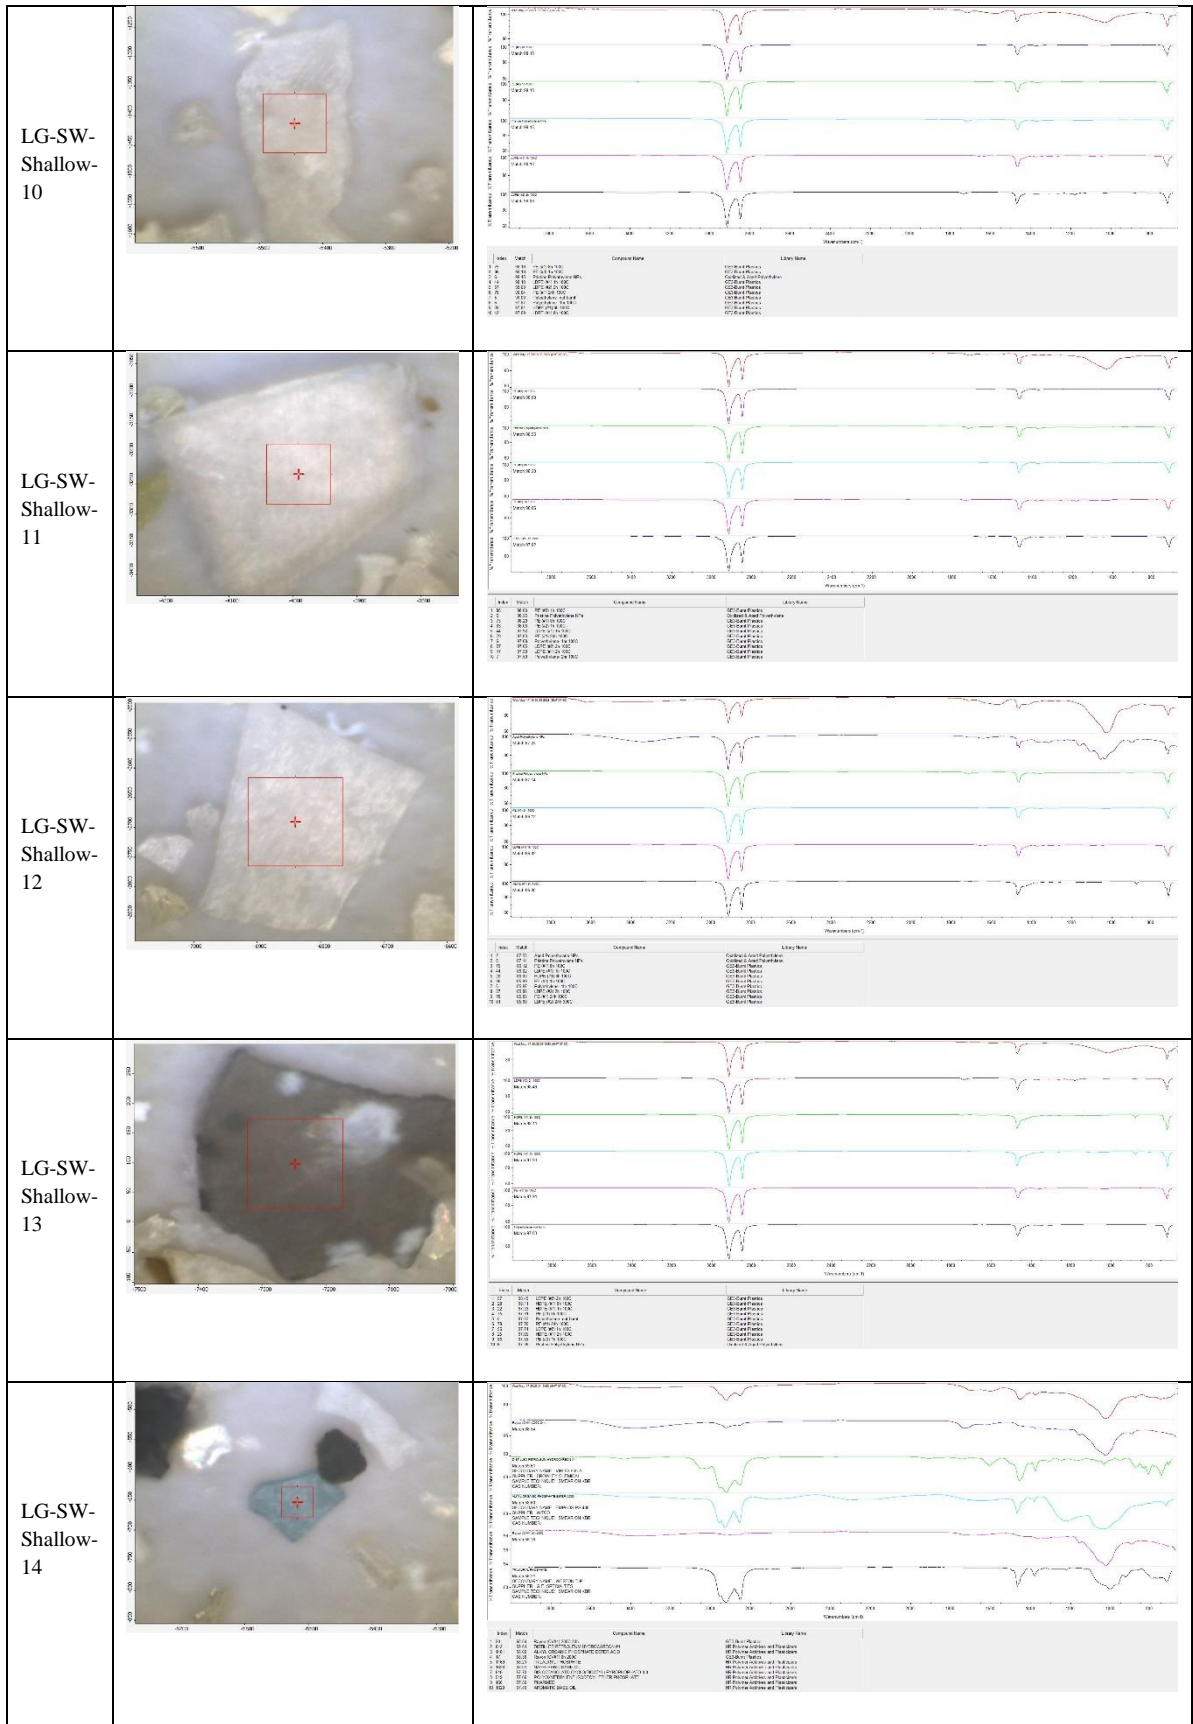

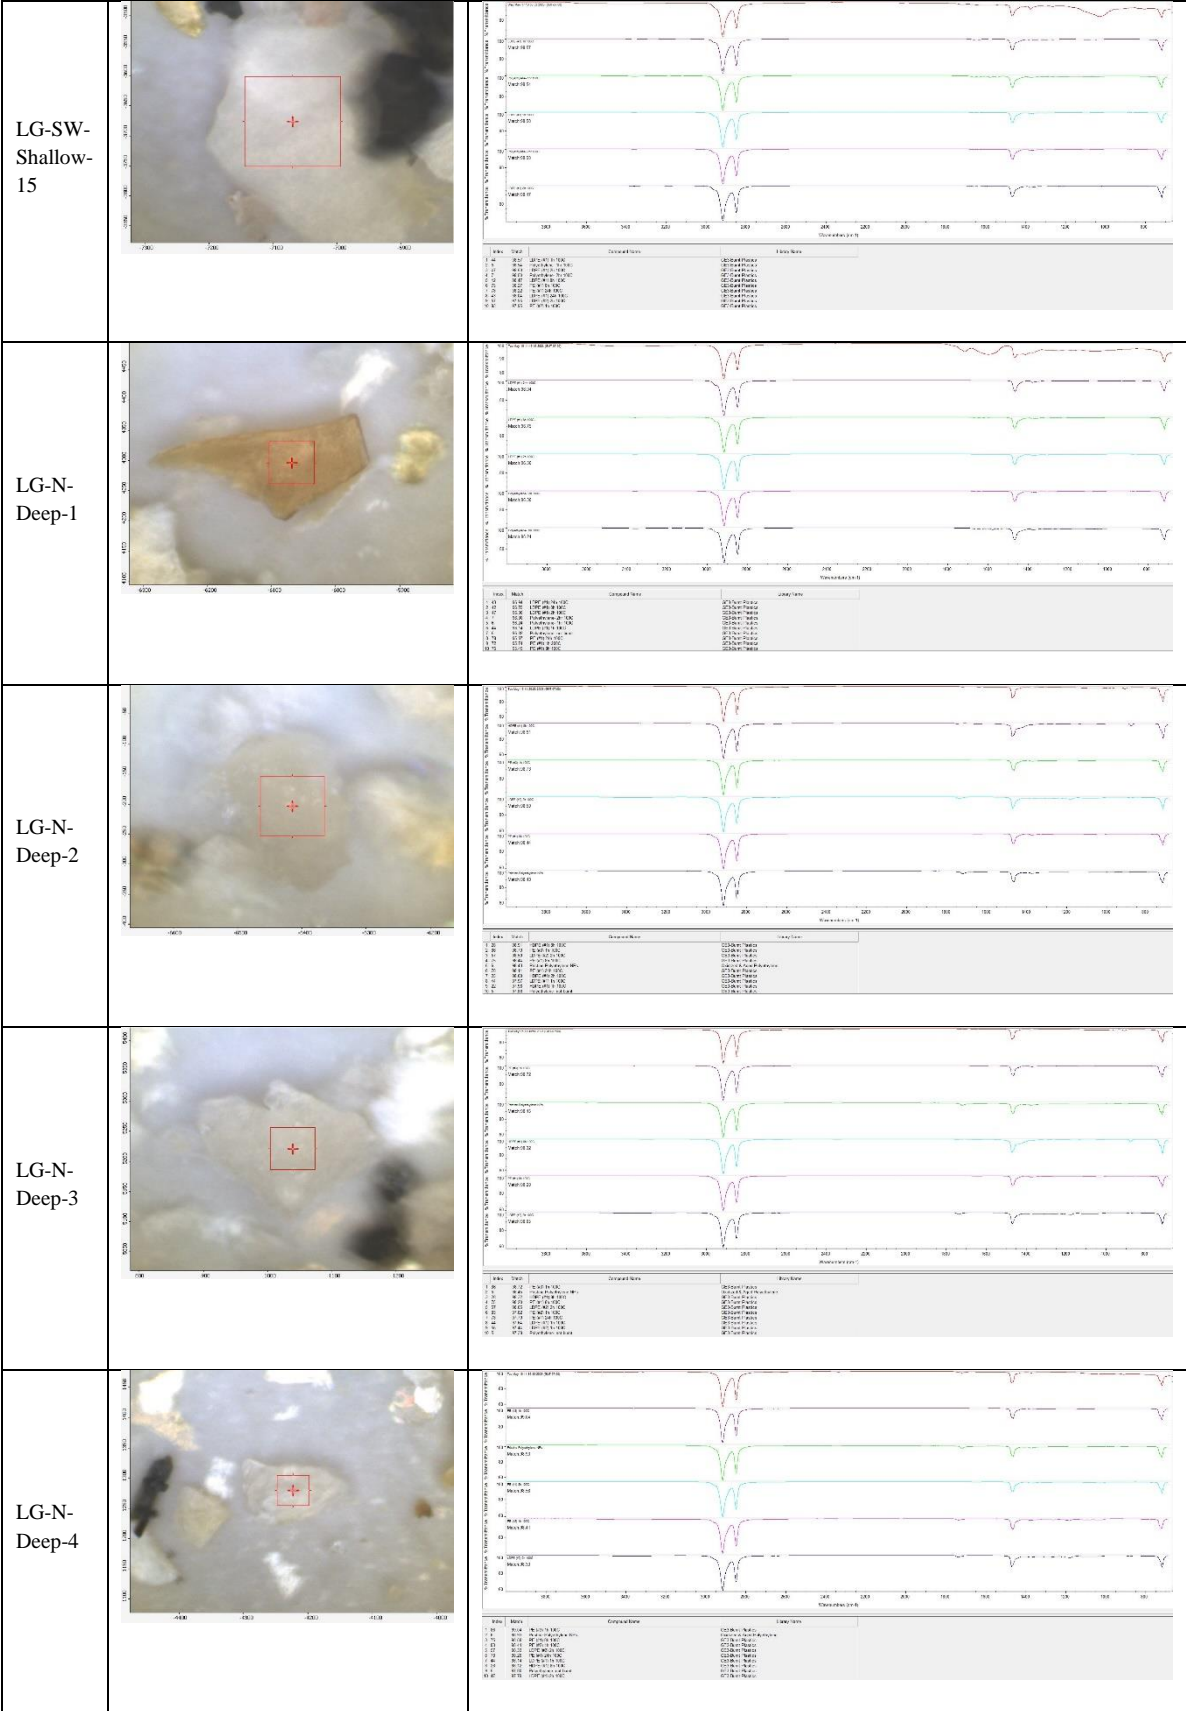

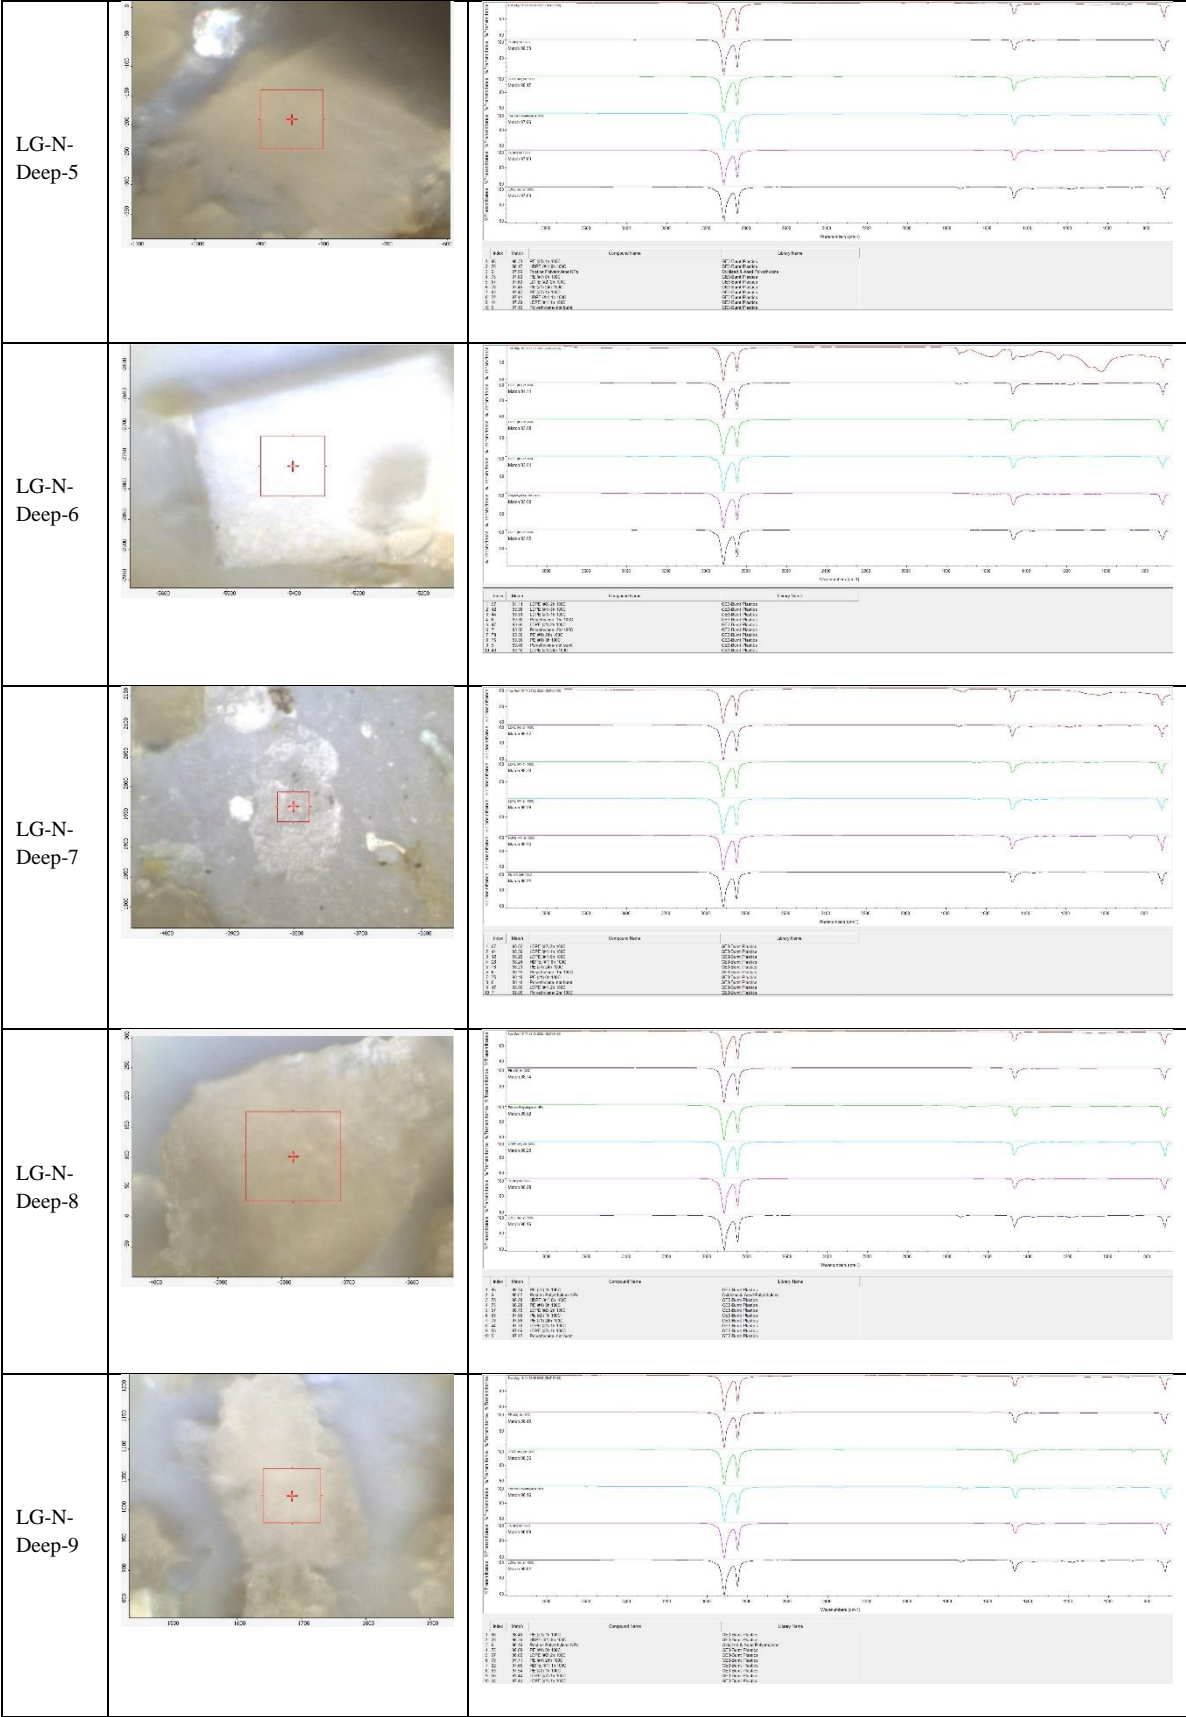

LG-N-Deep-10

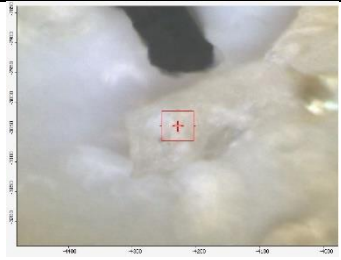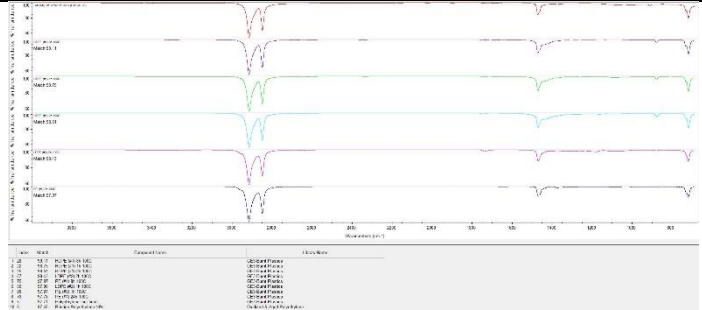

LG-N-Deep-11

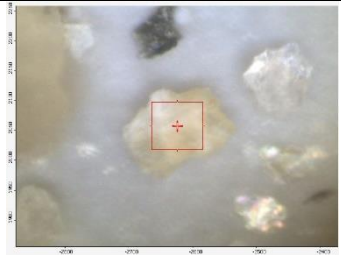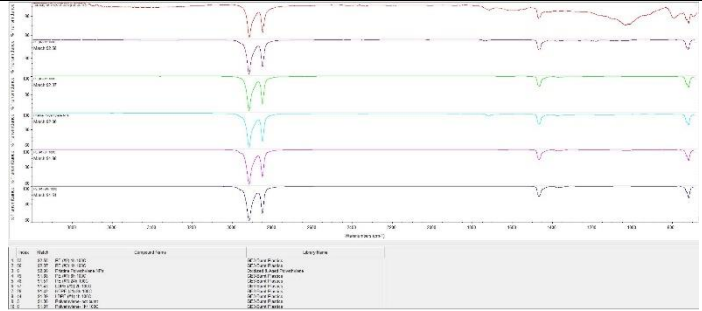

LG-N-Deep-12

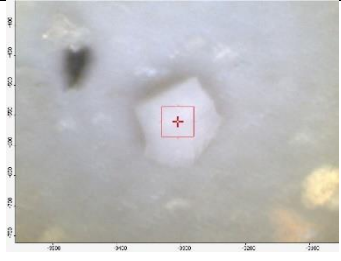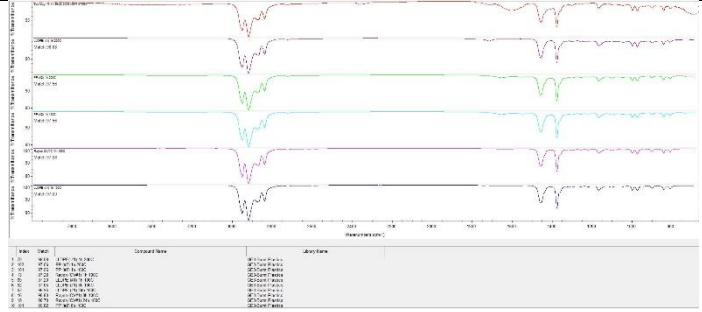

LG-N-Deep-13

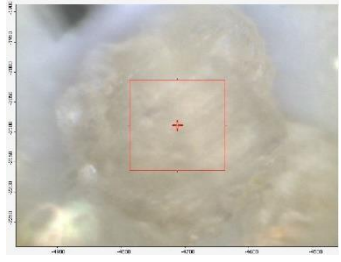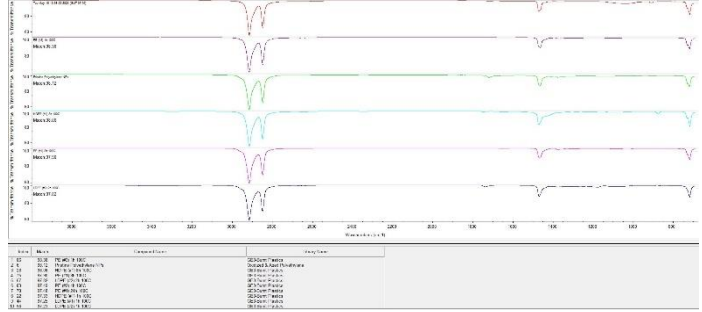

LG-N-Deep-14

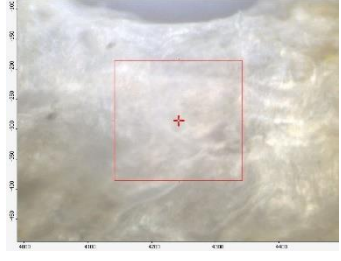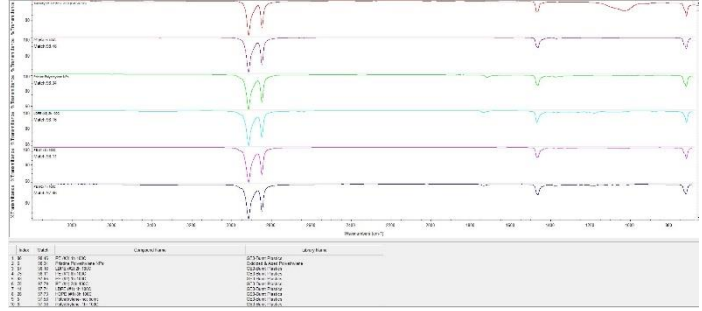



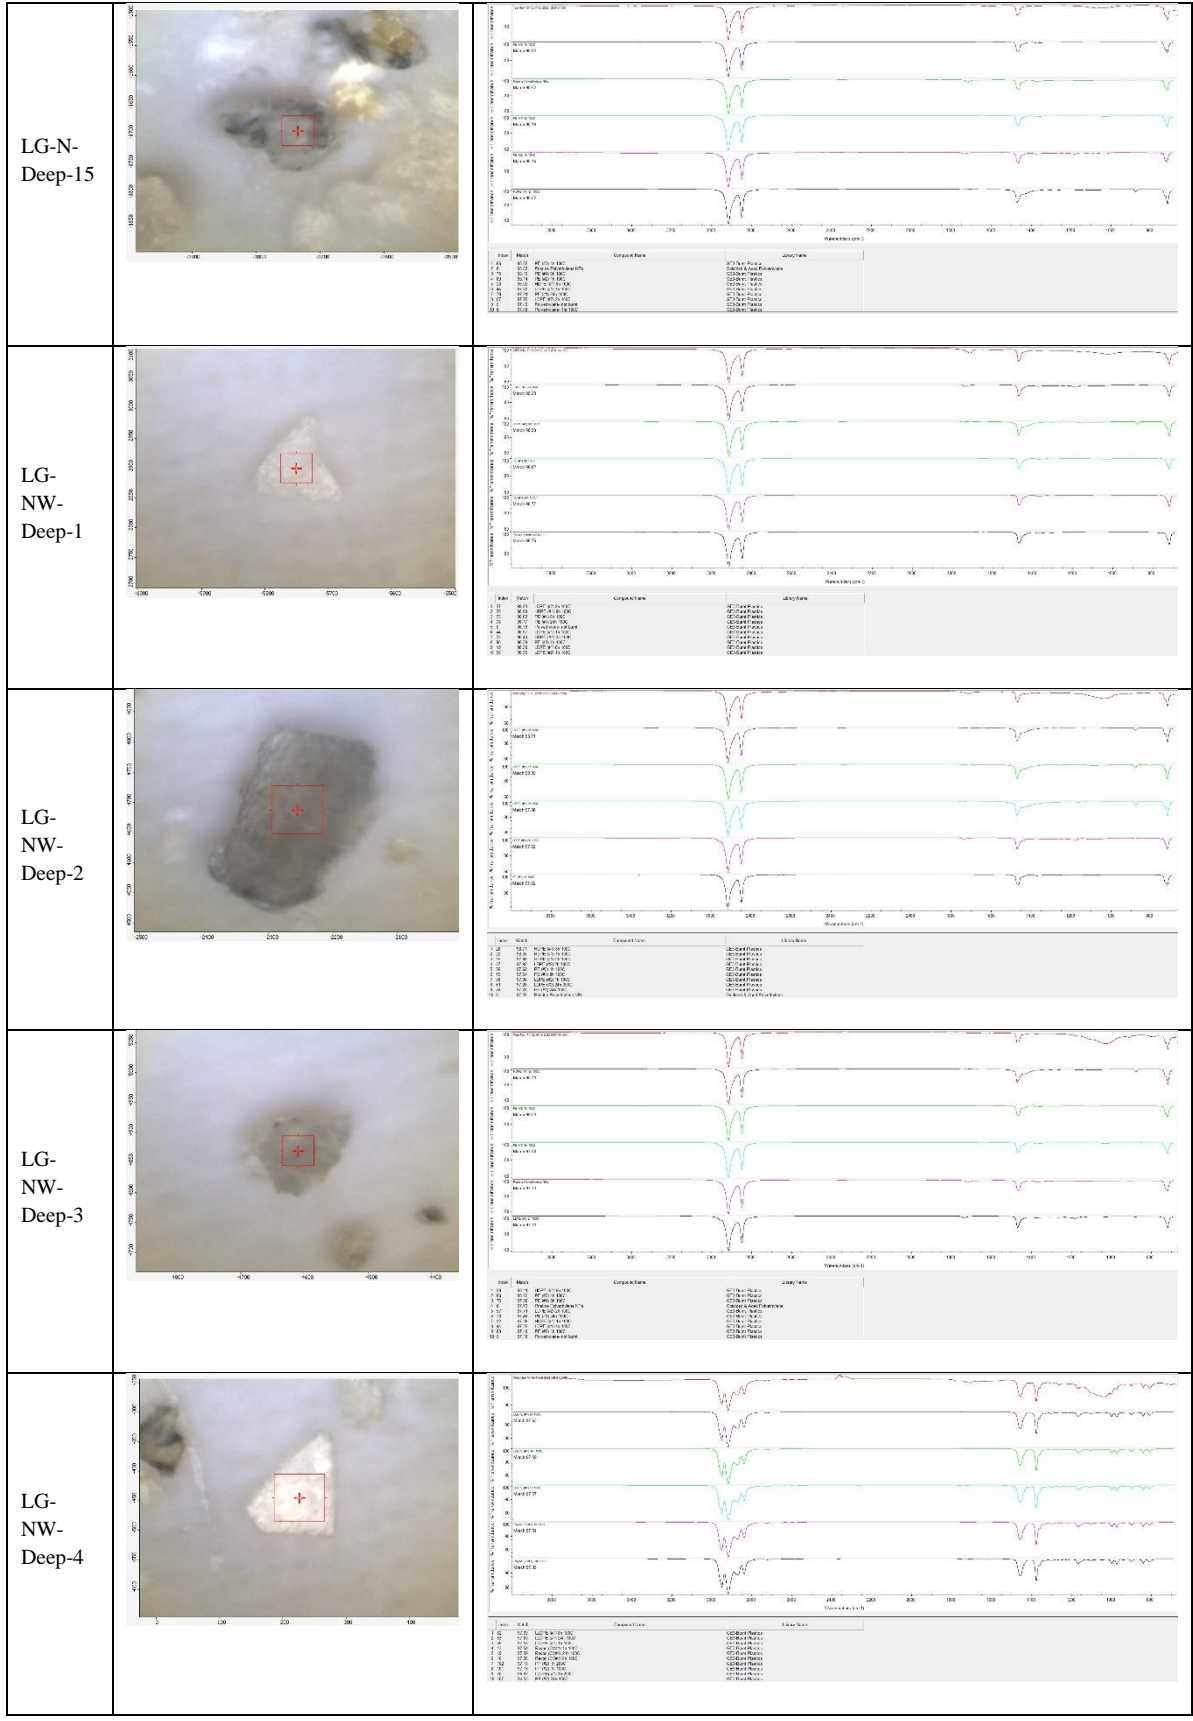

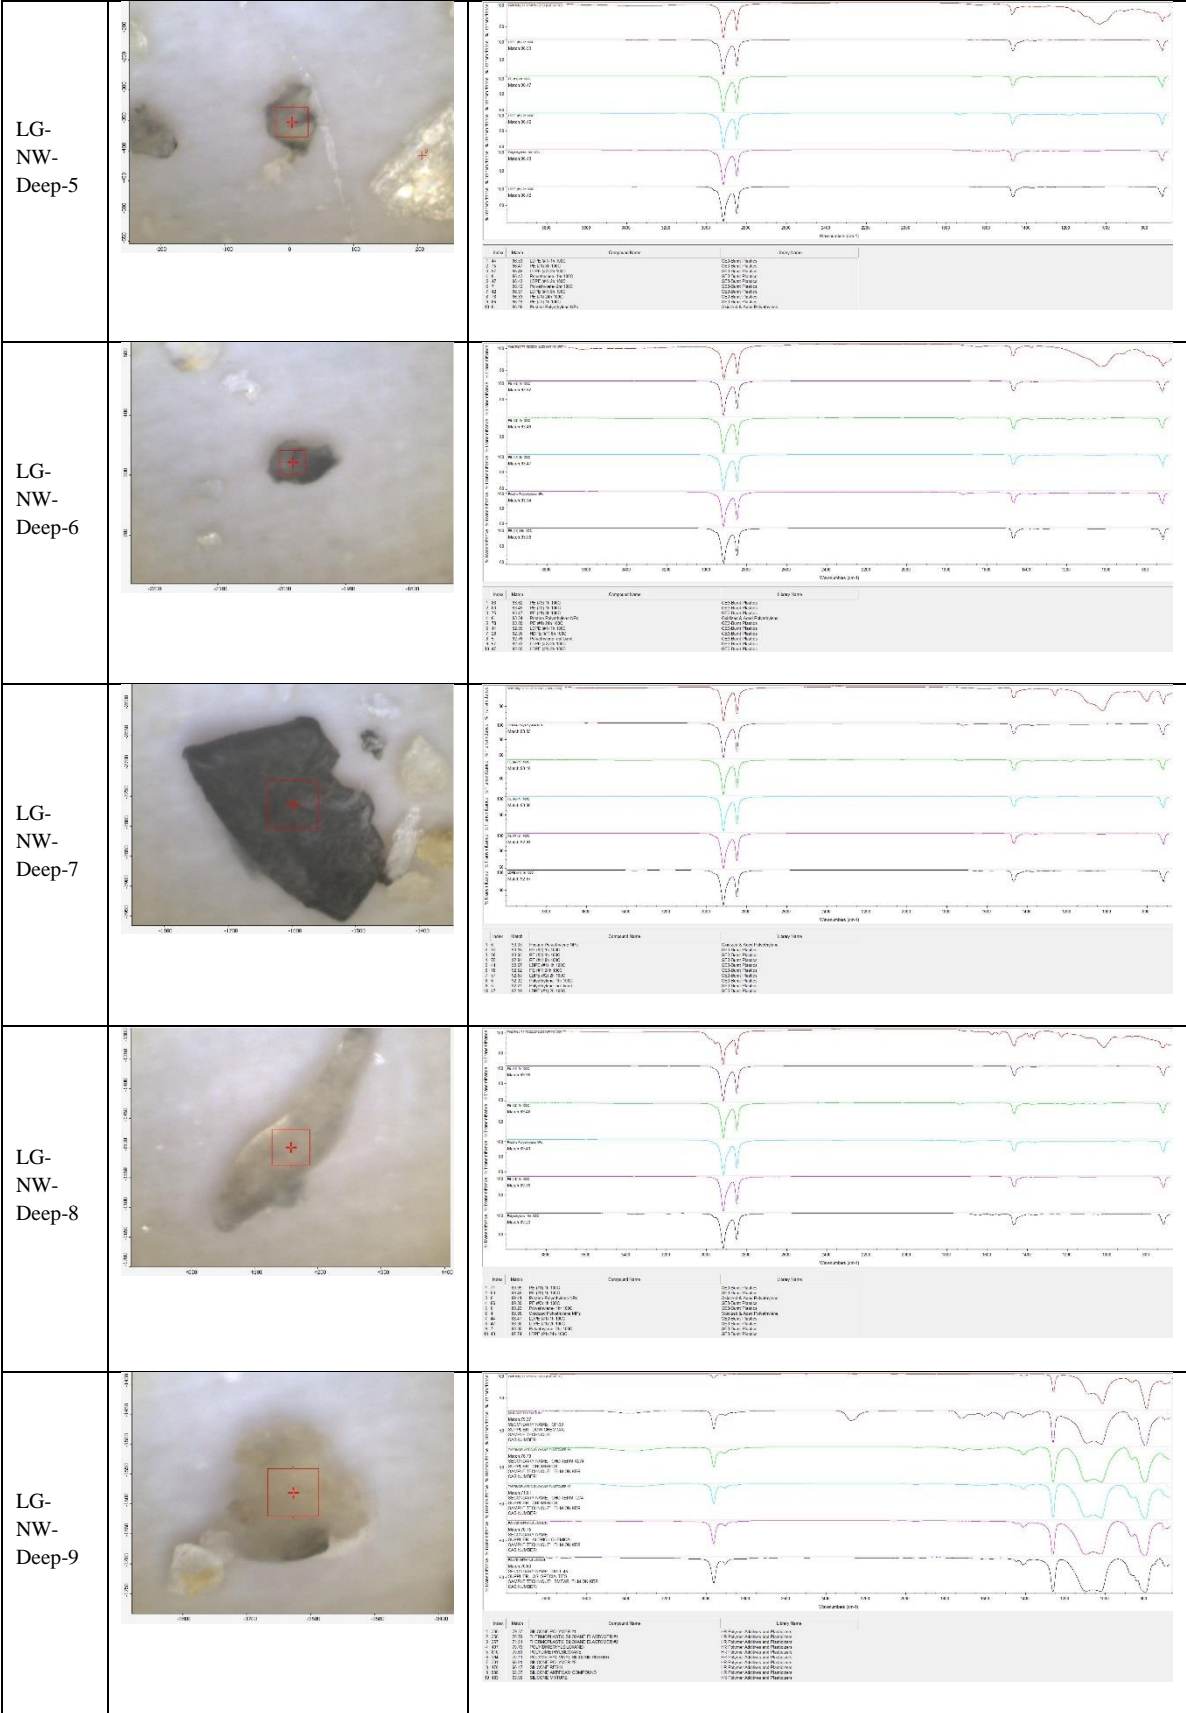

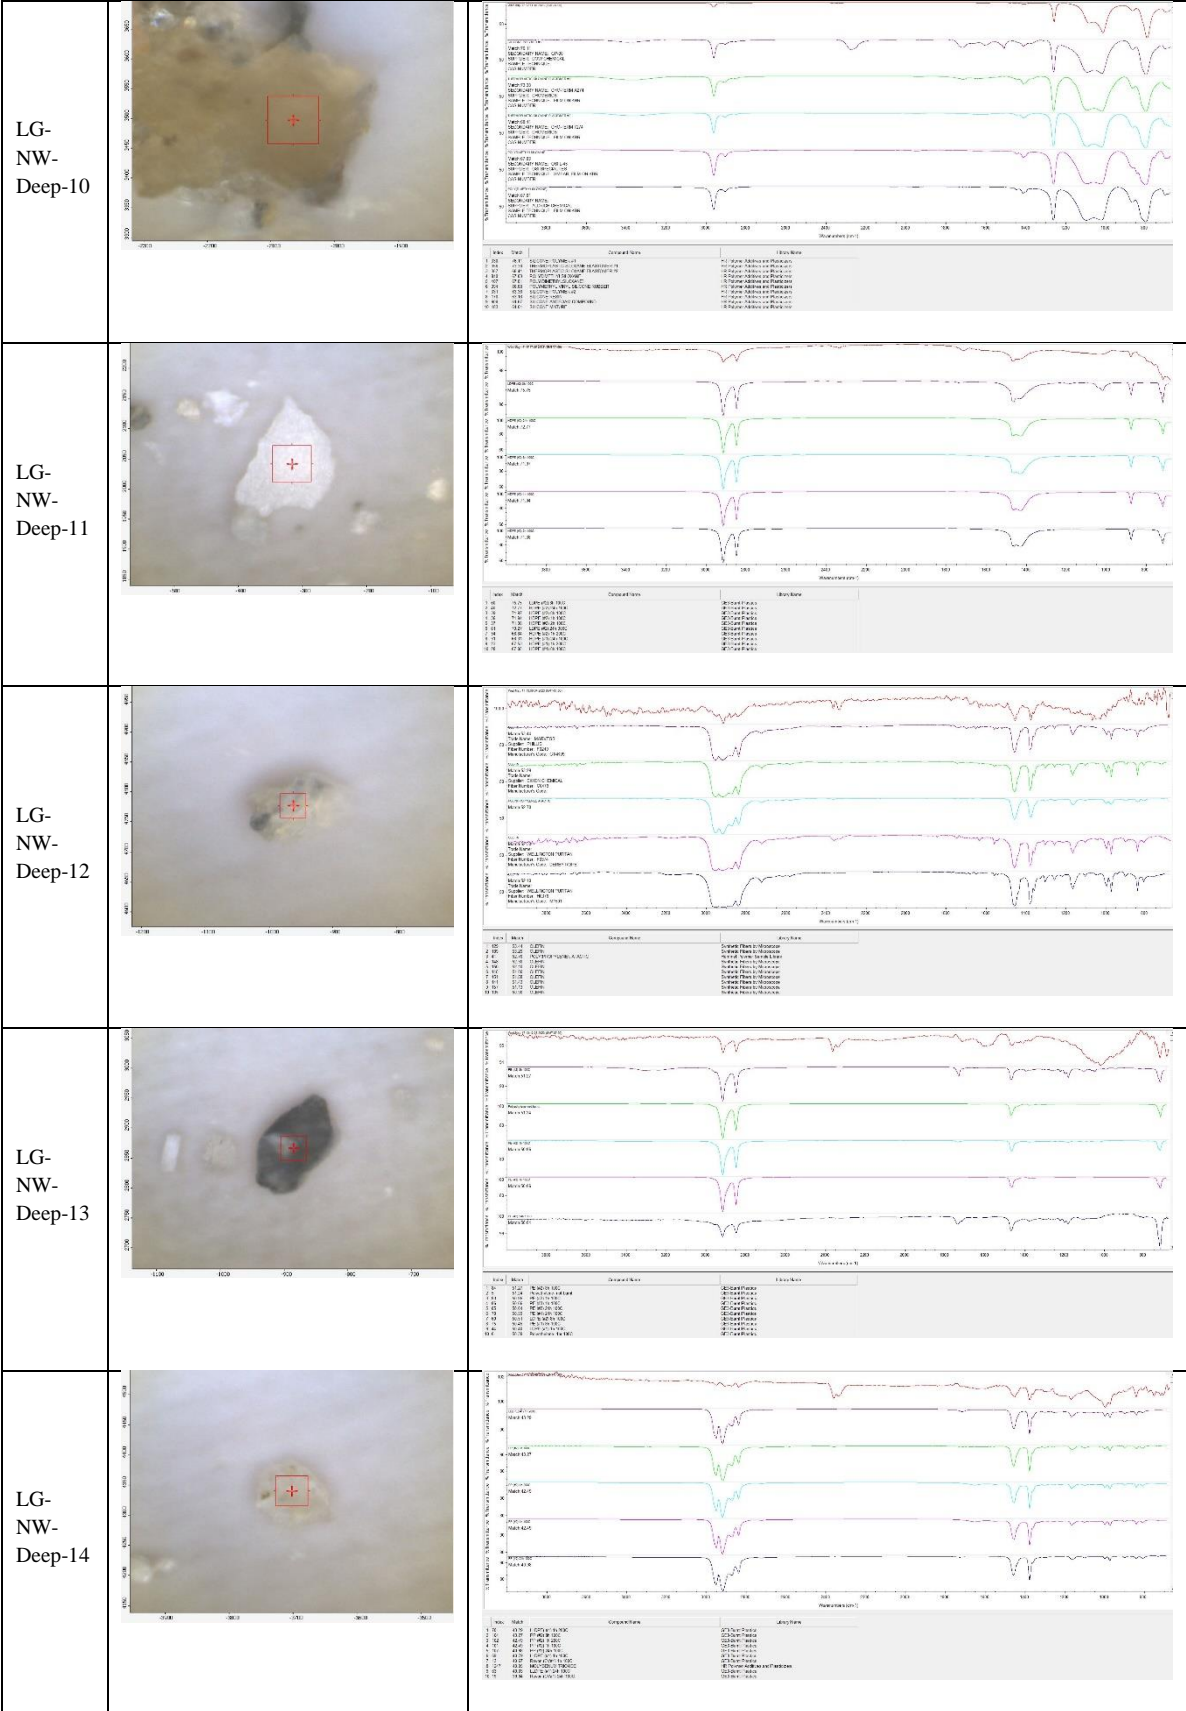

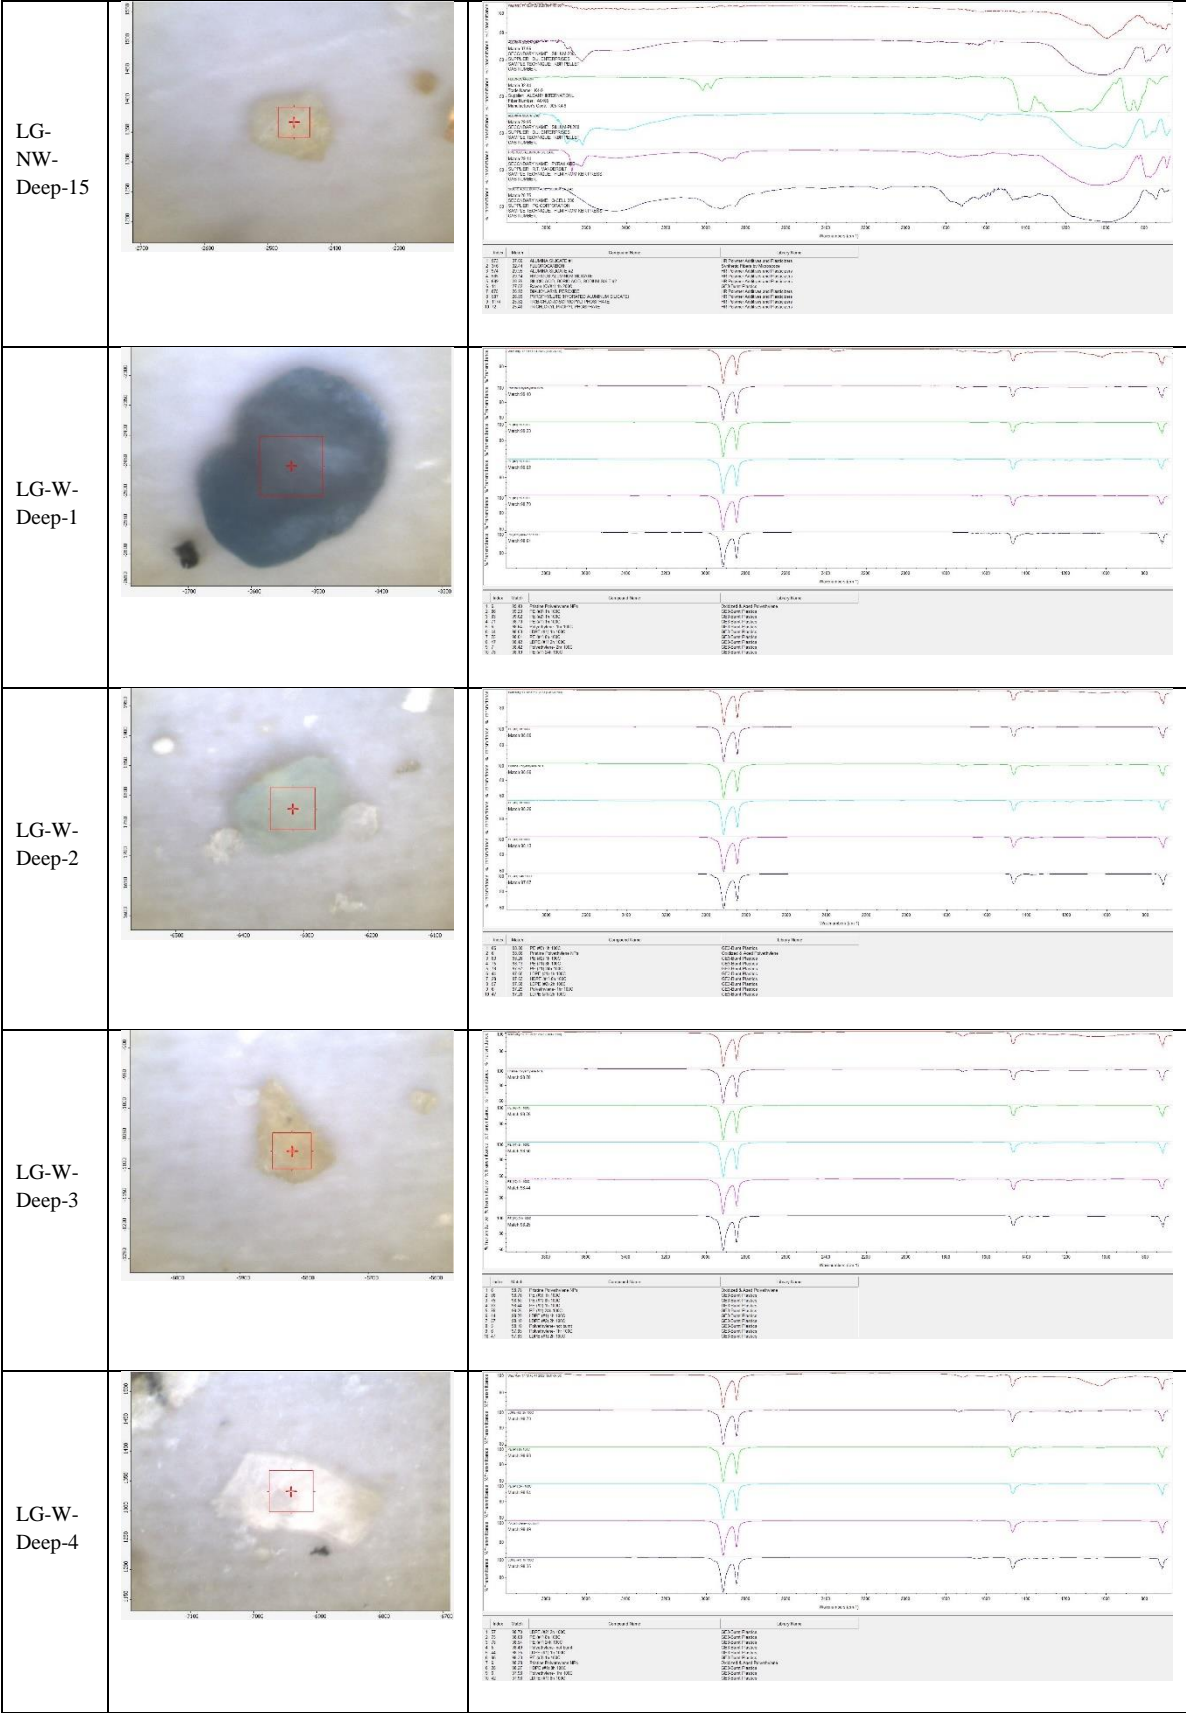

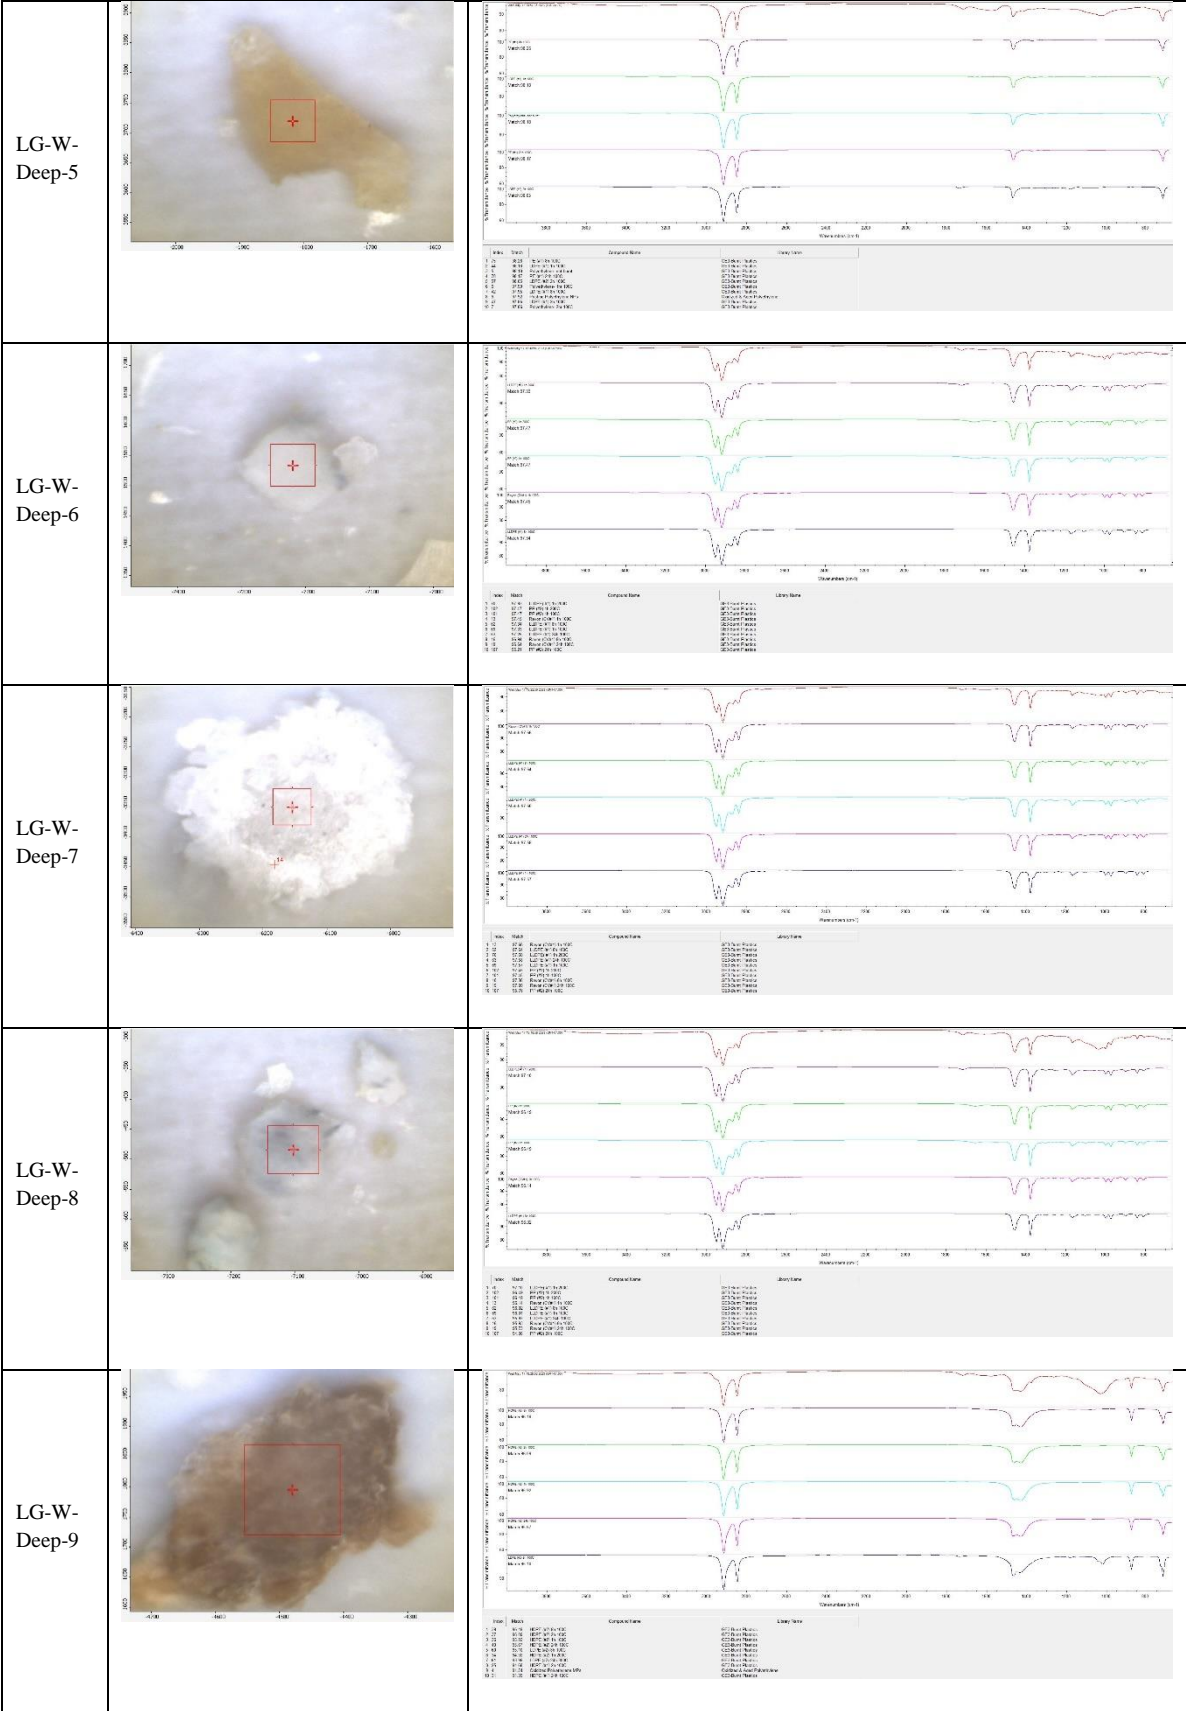

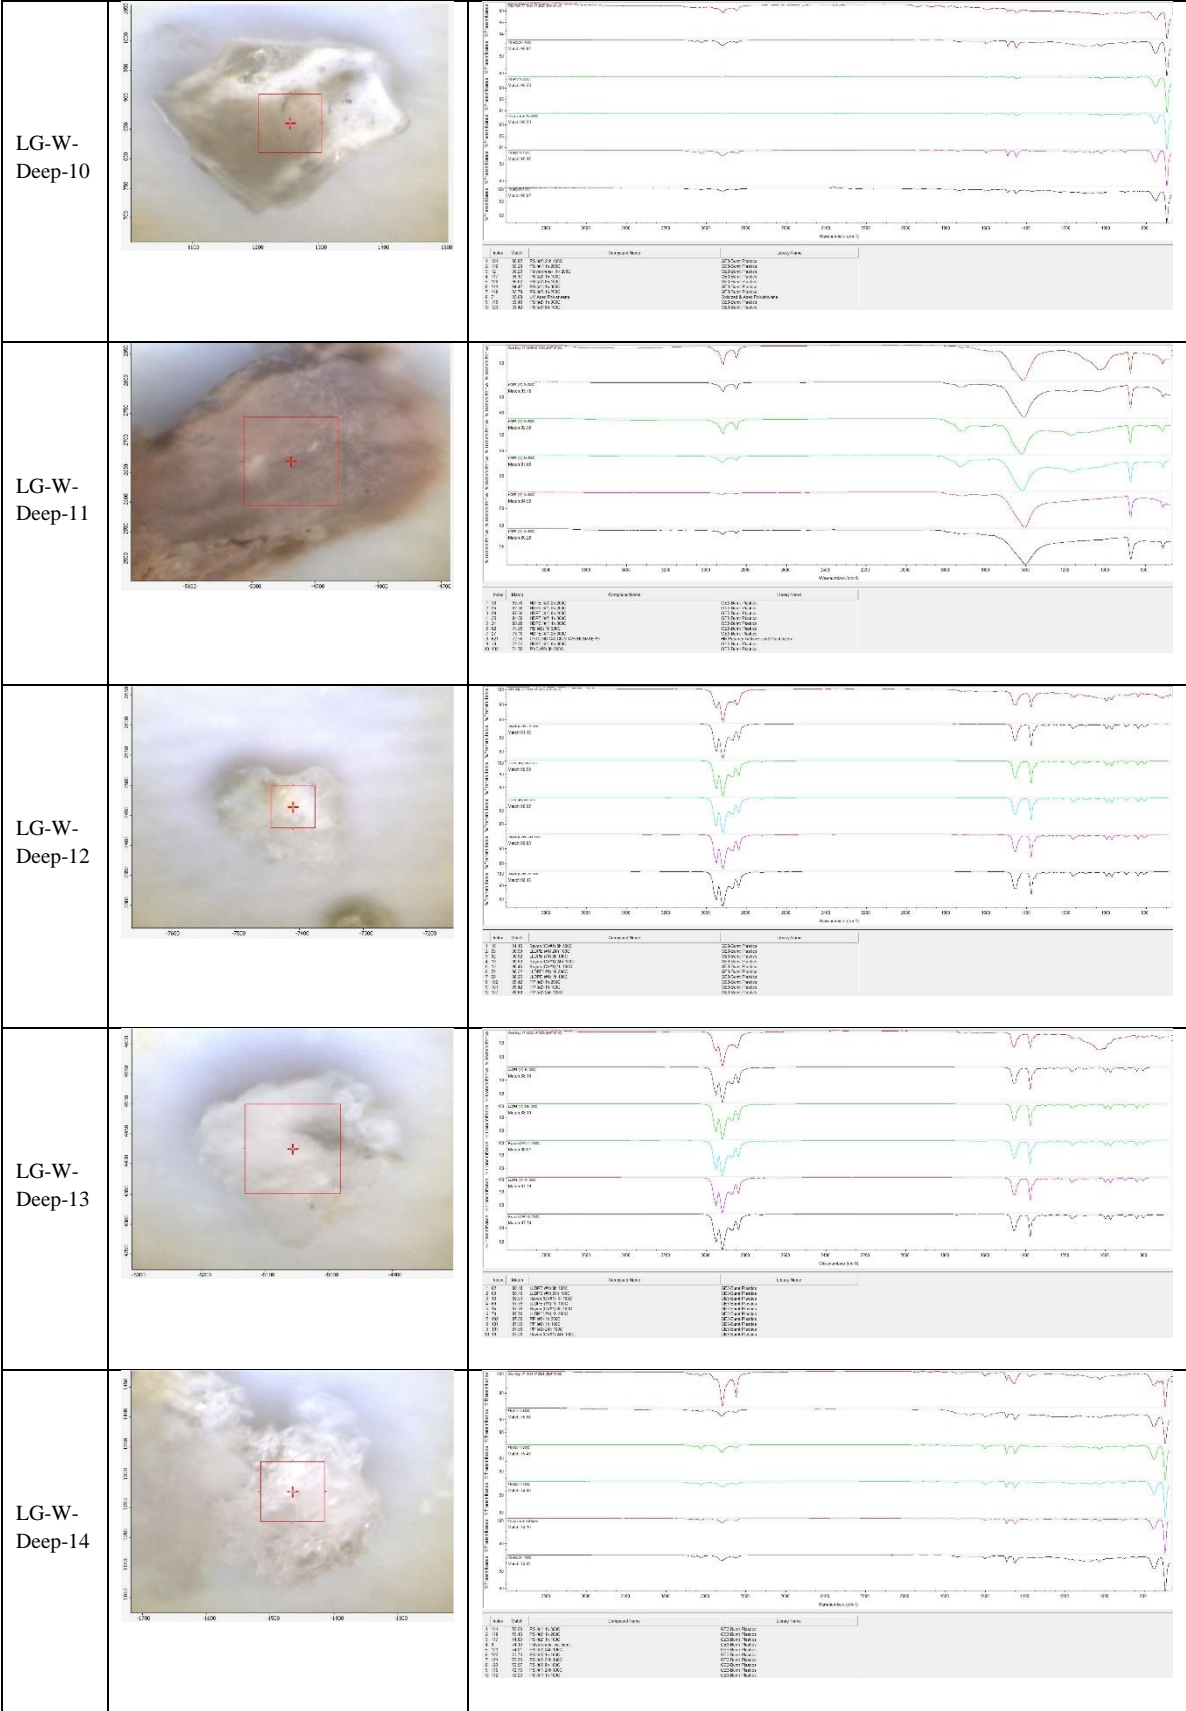

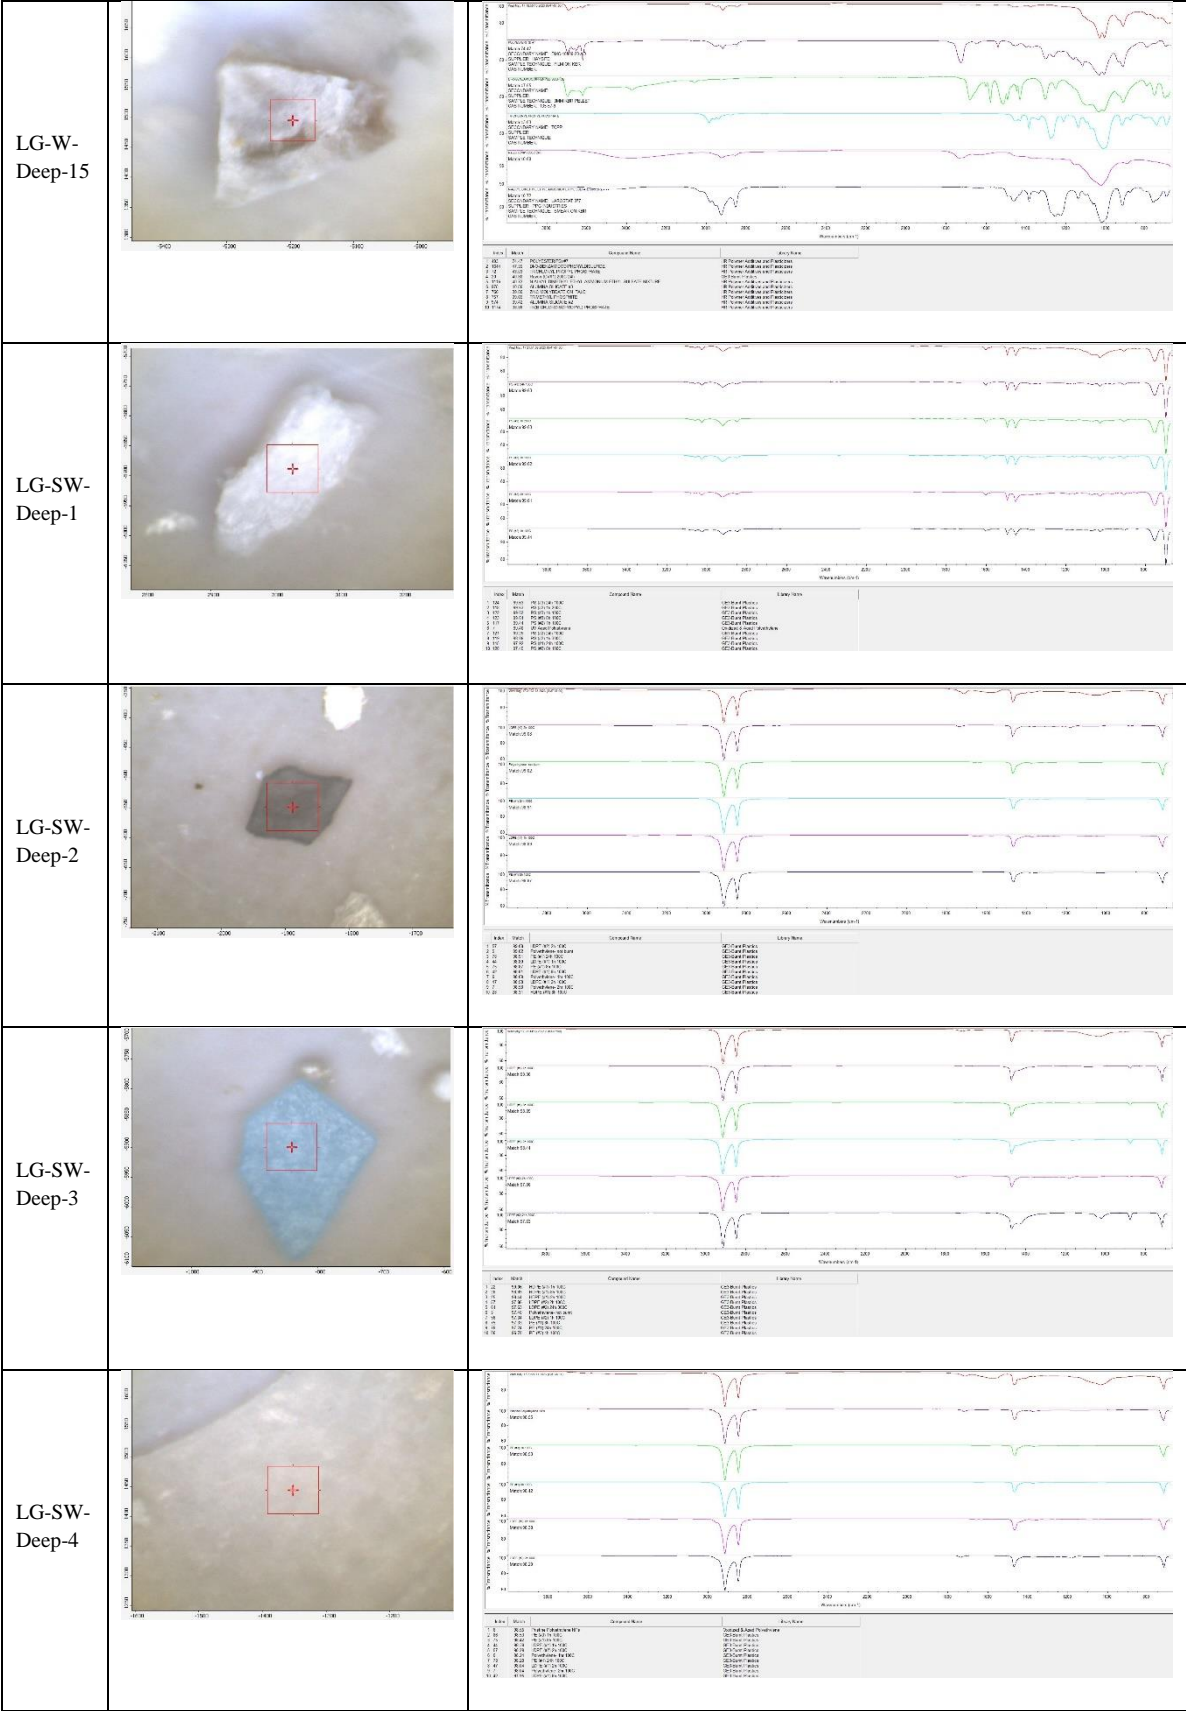

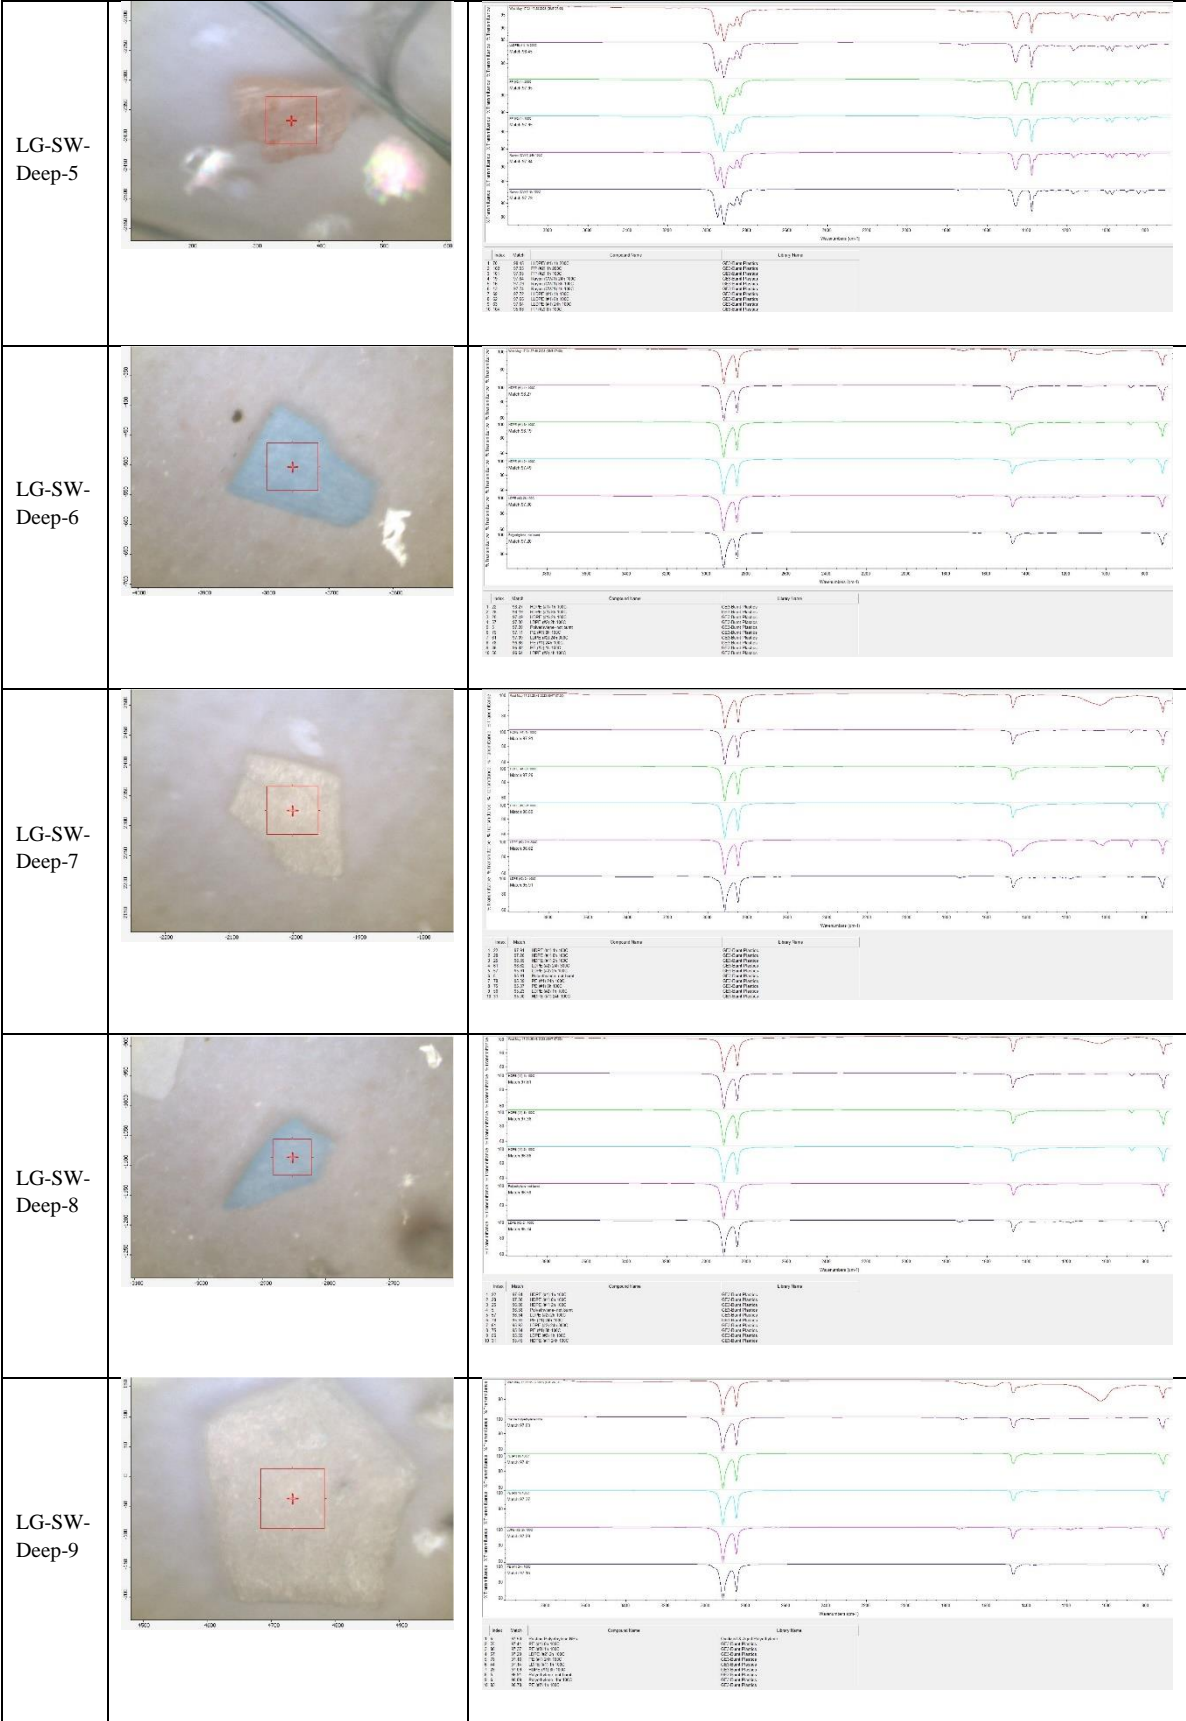



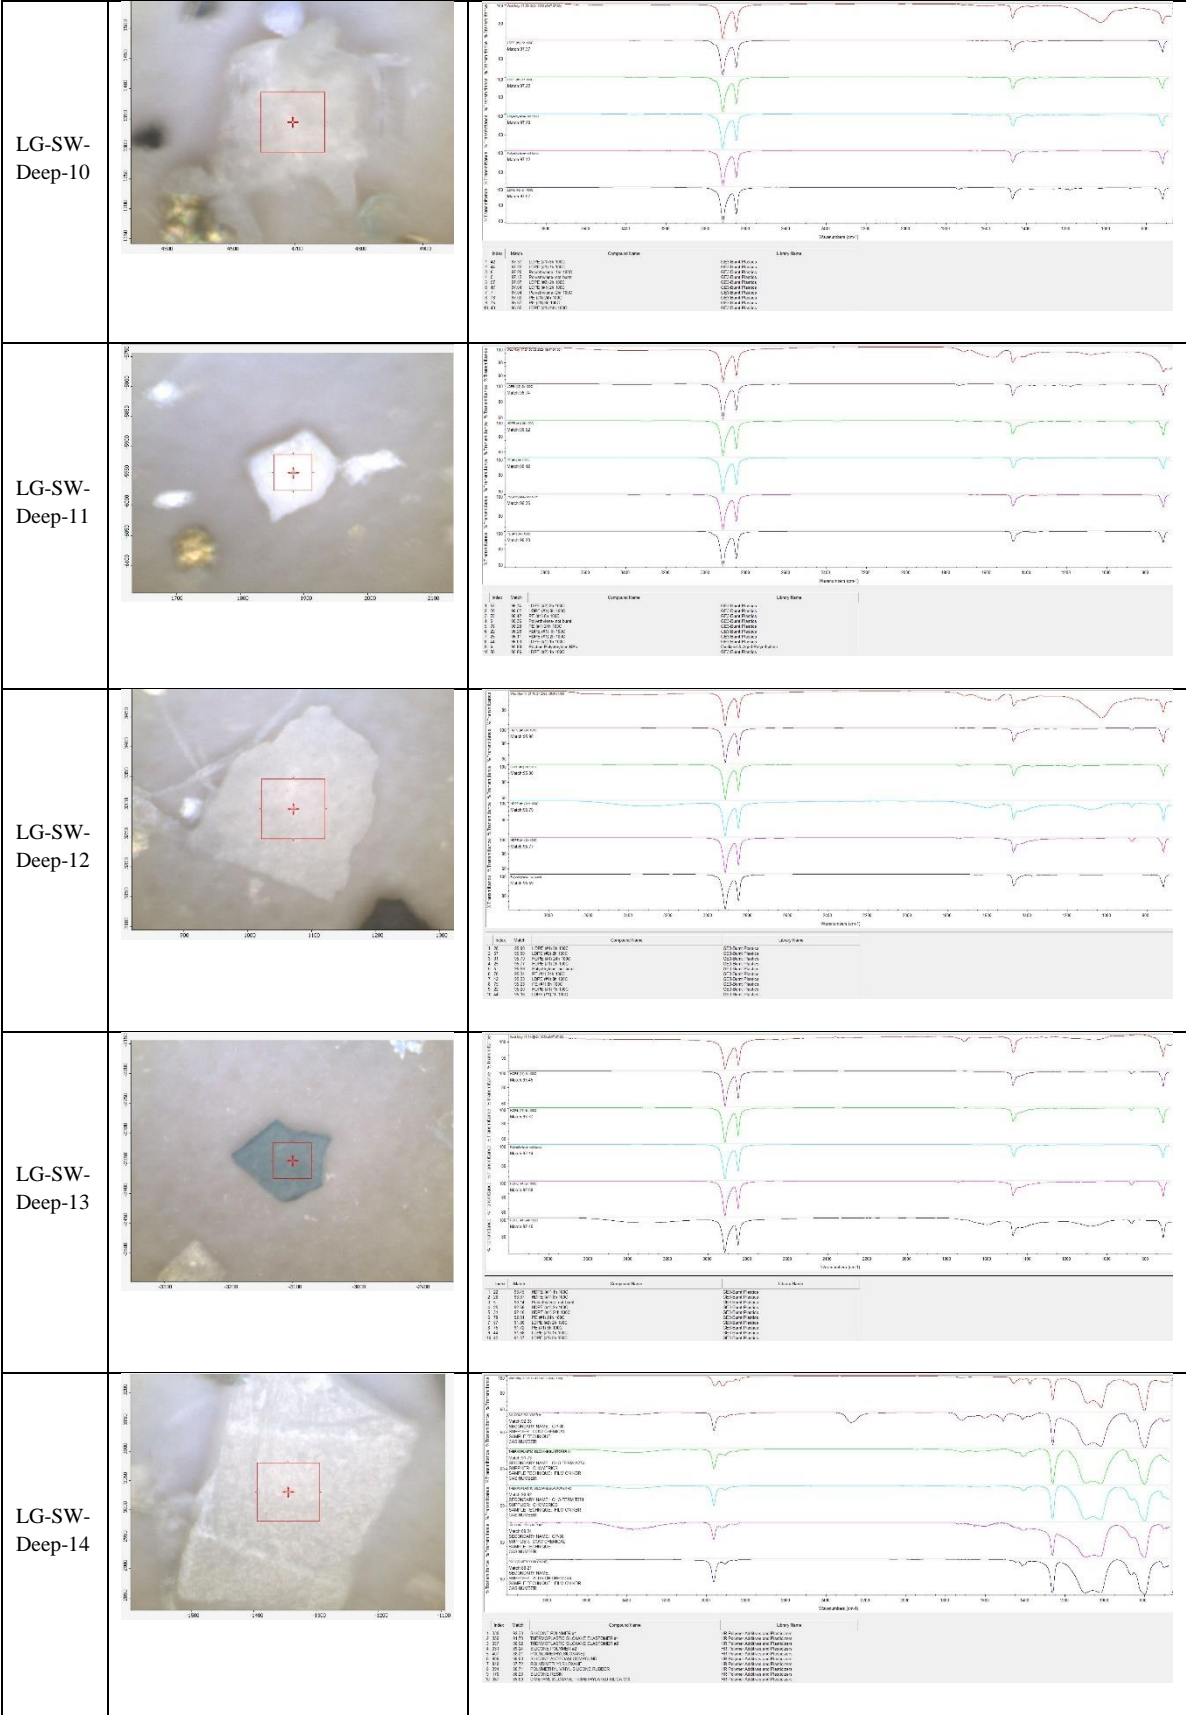

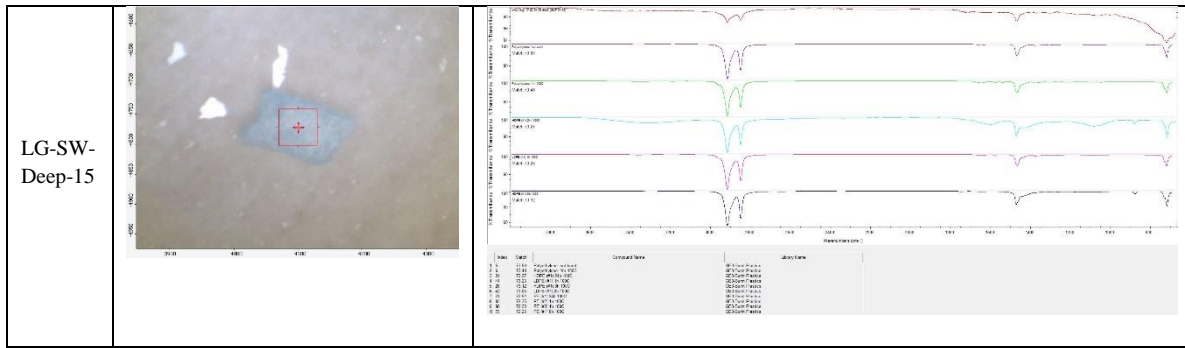

**Table S20: Lab Control and Background Sites ATR-FTIR Particle and Spectra Images**

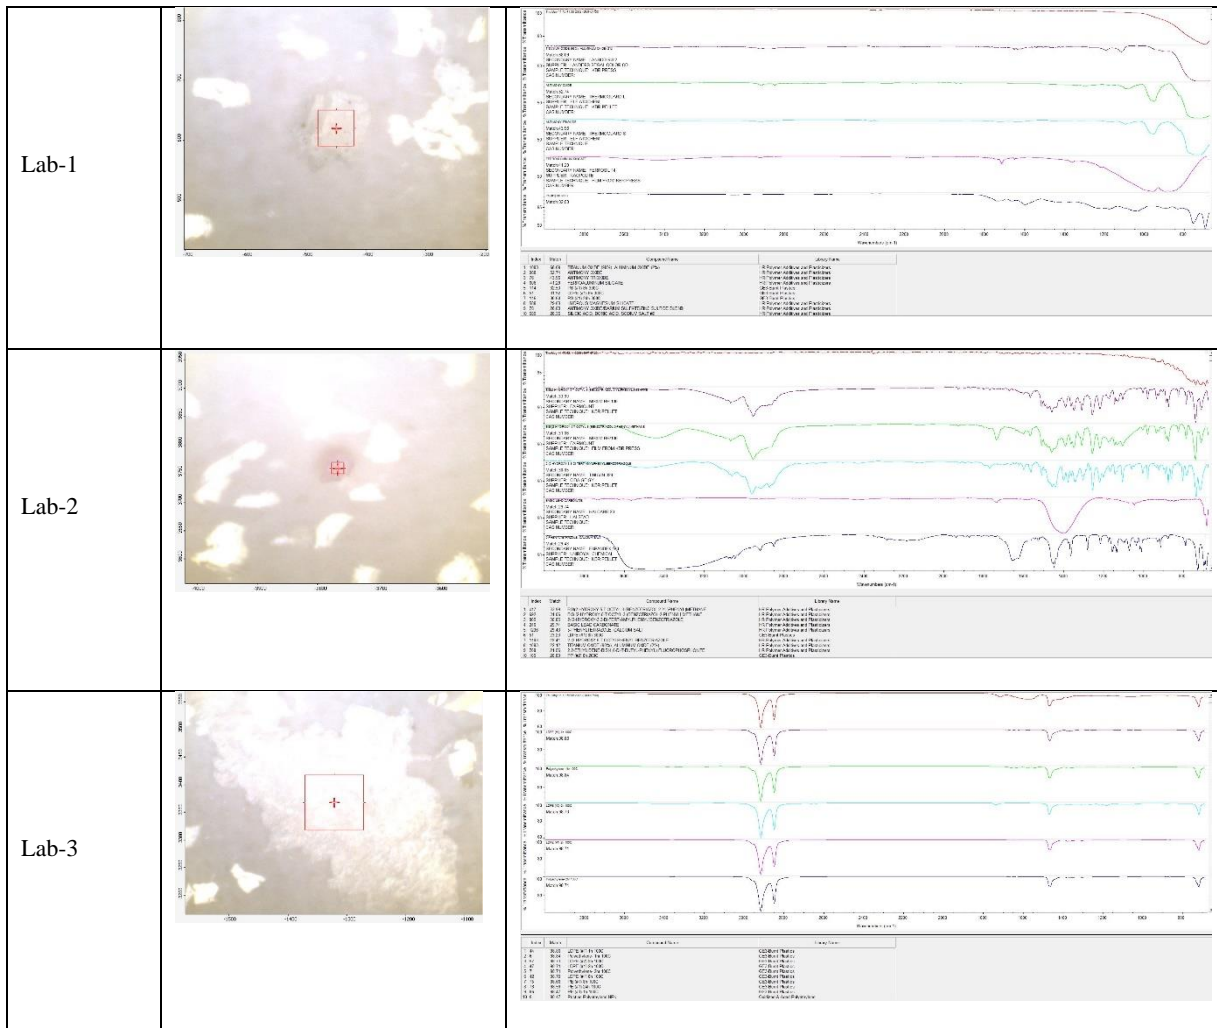

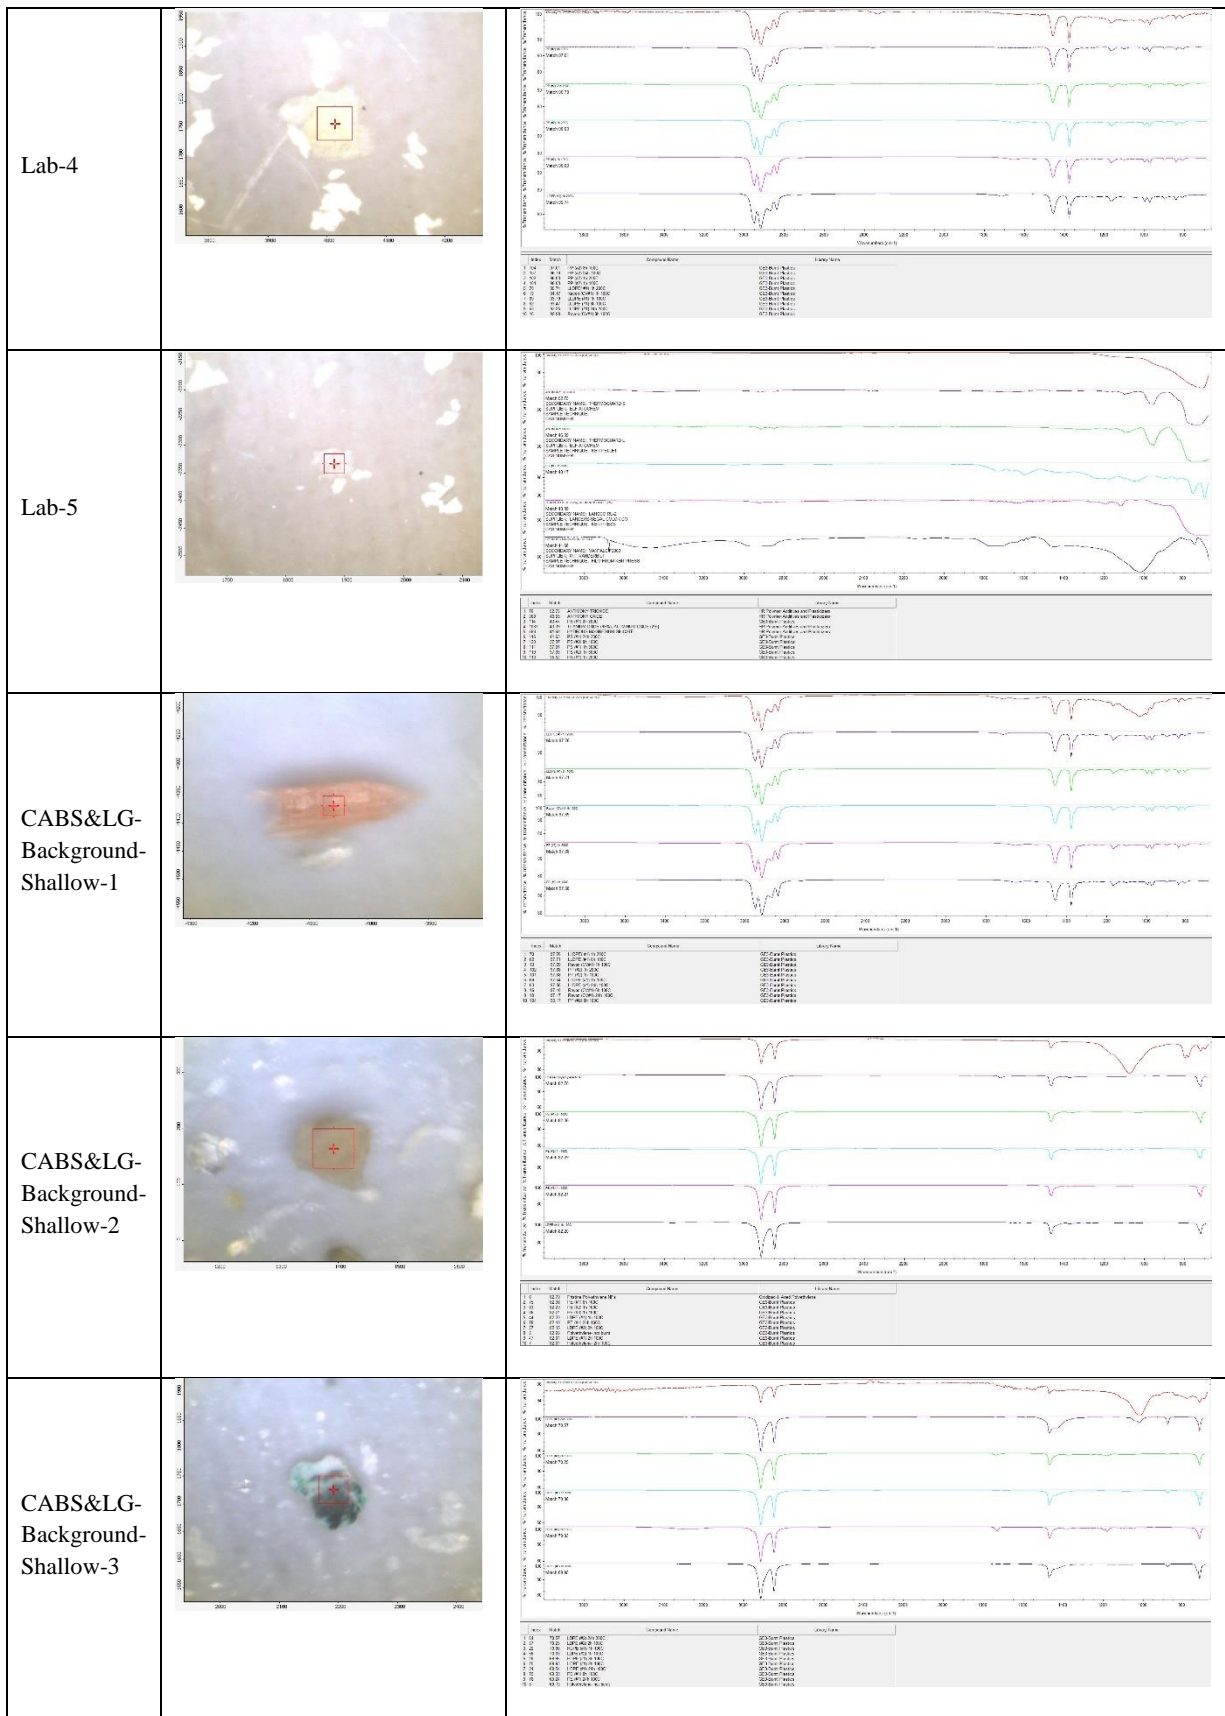

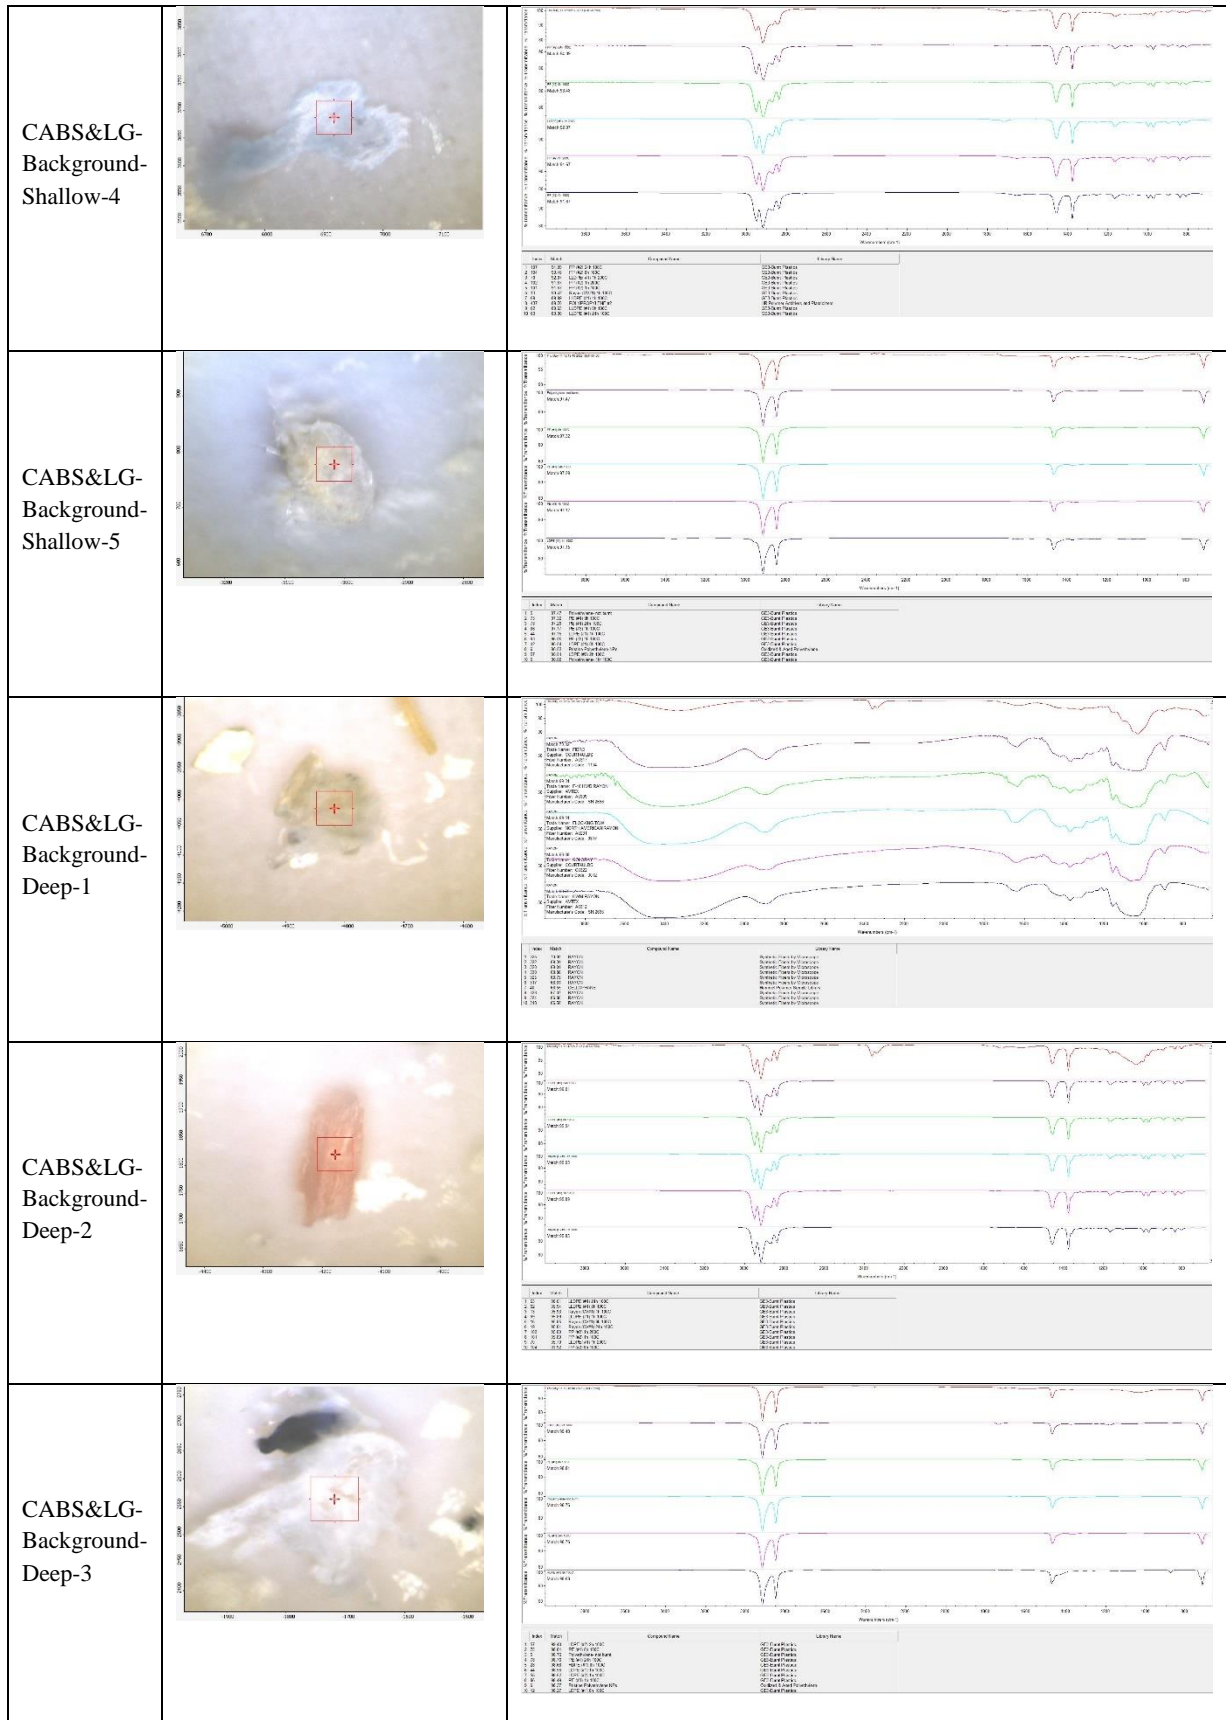

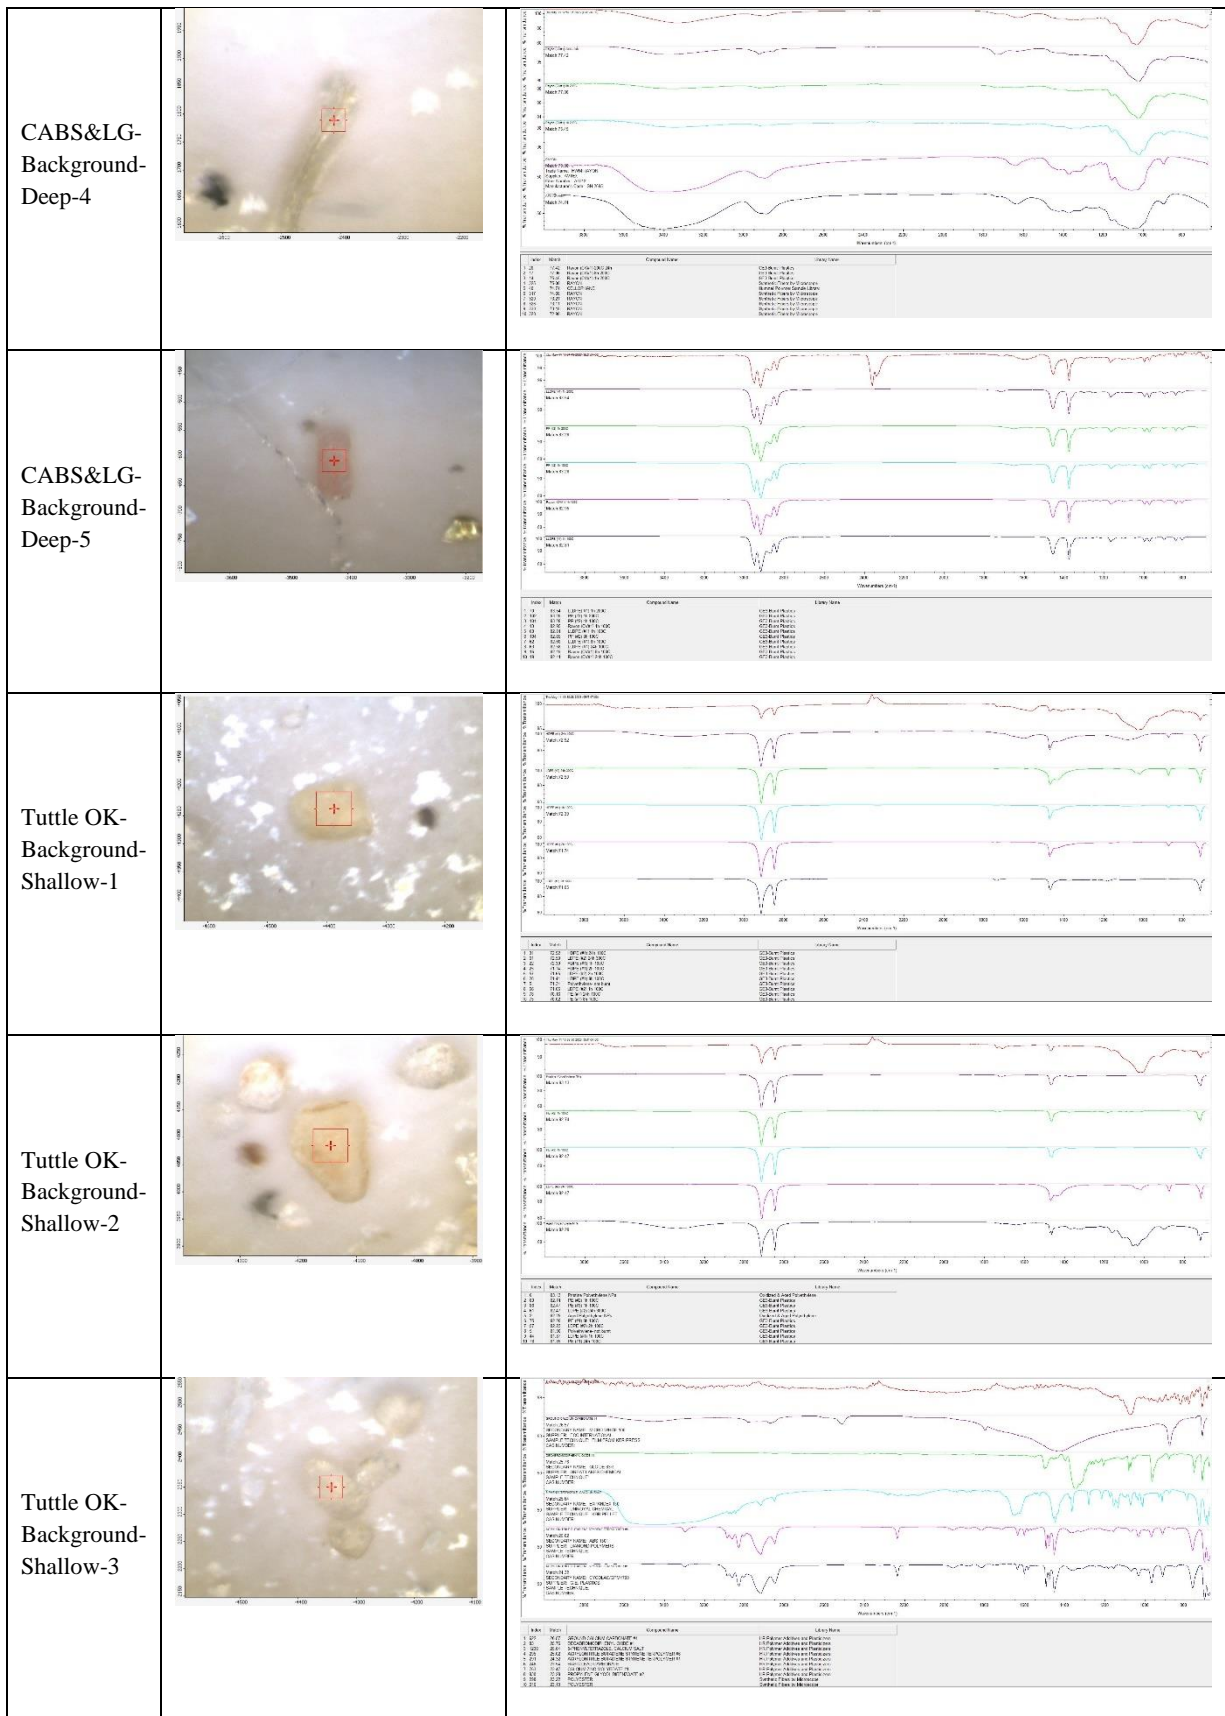

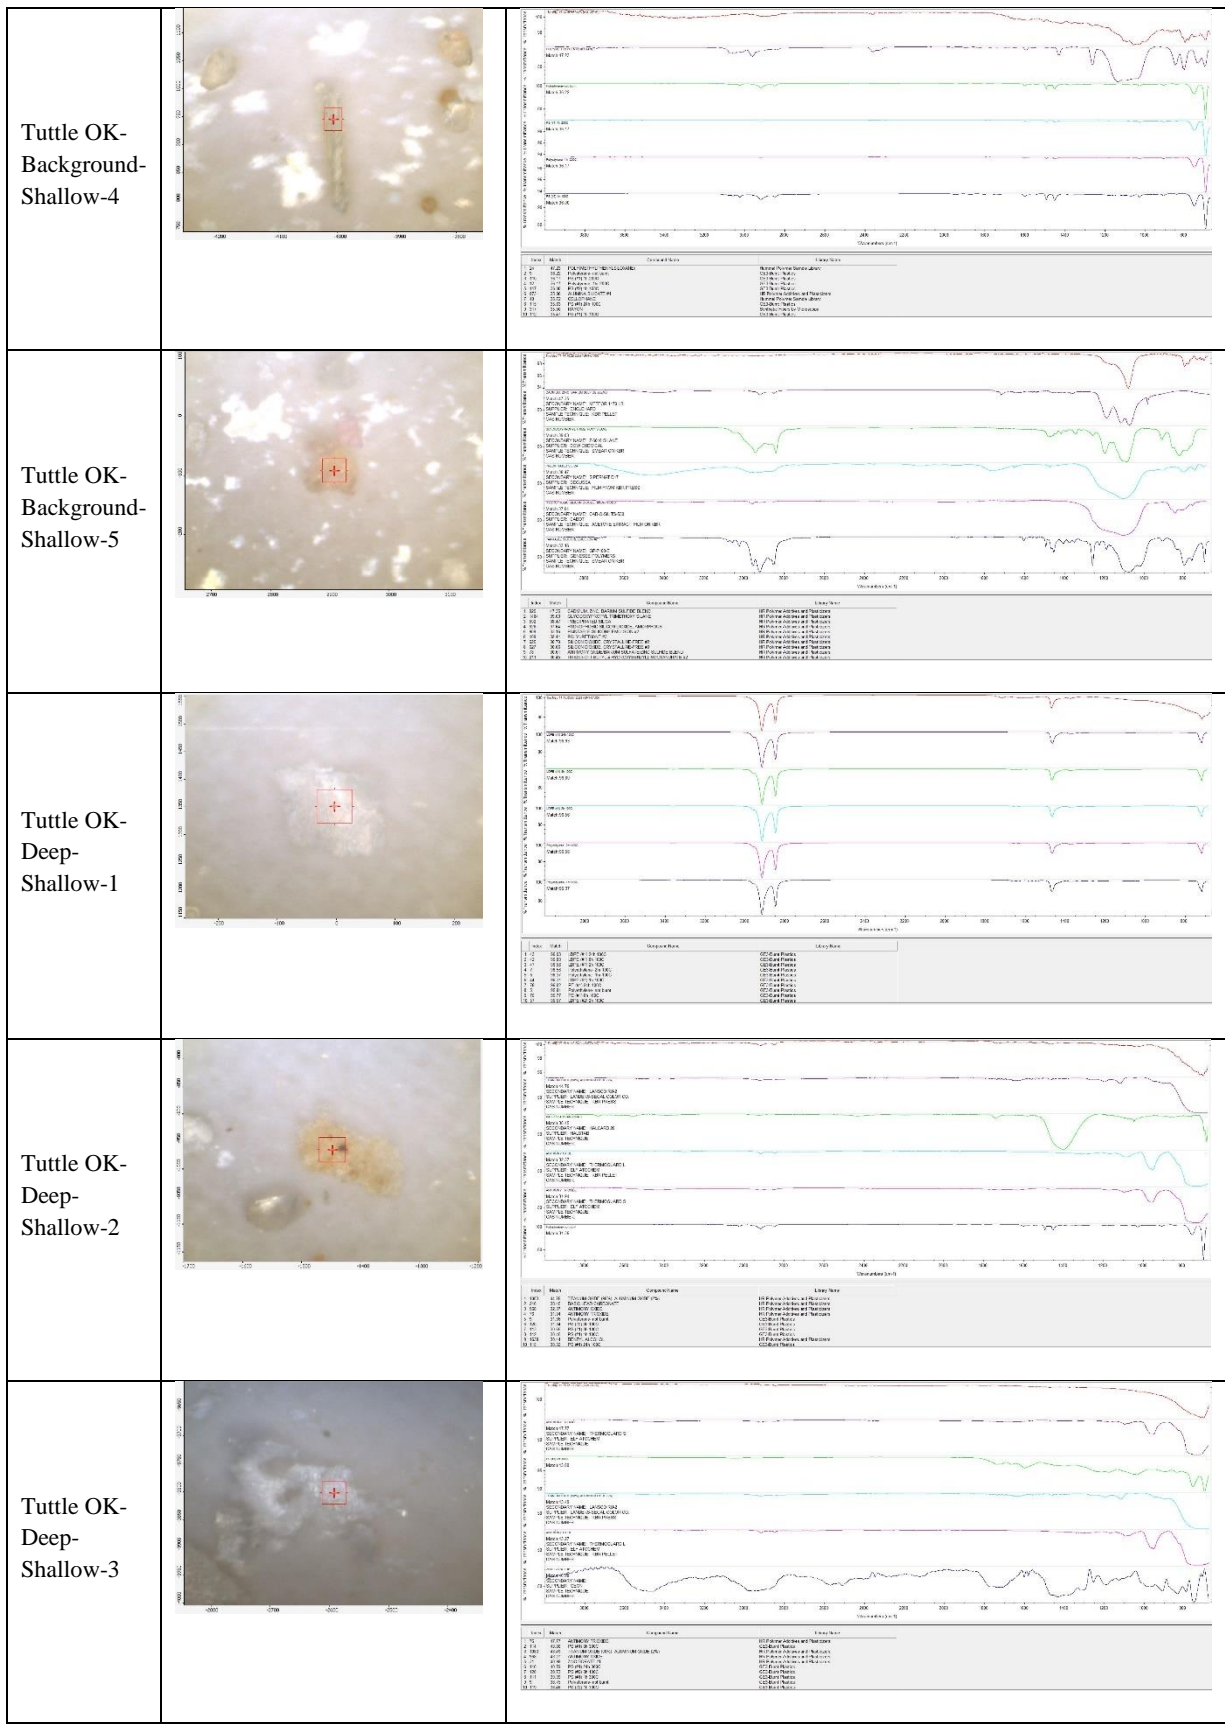

Tuttle OK-  
Deep-  
Shallow-4

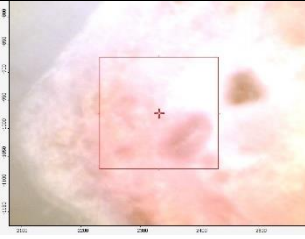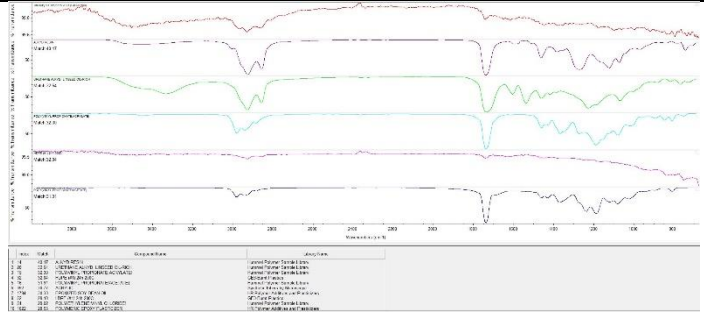

Tuttle OK-  
Deep-  
Shallow-5

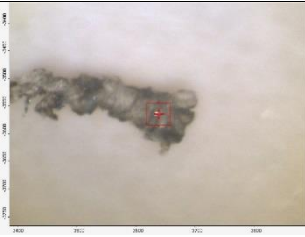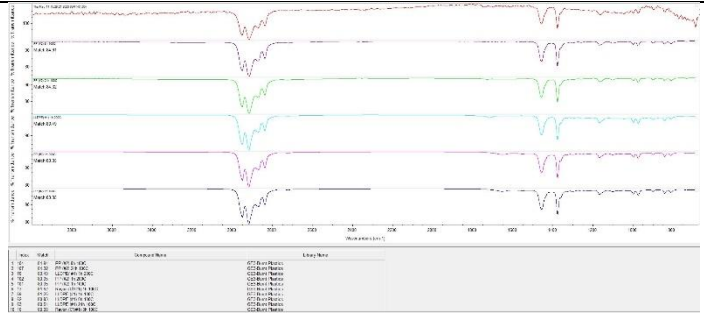

**Table S21.** Independent T-test of the open dumping sites, background sites, and lab controls.

| Location                          |         | Lodge Grass |          |            |          | Crow Agency |          |            |          | Tuttle     |       |            |       |    |
|-----------------------------------|---------|-------------|----------|------------|----------|-------------|----------|------------|----------|------------|-------|------------|-------|----|
| Depth                             | Lab     | 0-9cm       |          | 9-18cm     |          | 0-9cm       |          | 9-18cm     |          | 0-9cm      |       | 9-18cm     |       |    |
| Sample                            | Control | Background  | Site     | Background | Site     | Background  | Site     | Background | Site     | Background | Site  | Background | Site  |    |
| Data Points                       | 21      | 54          | 149      | 25         | 367      | 54          | 174      | 25         | 215      | 29         | 9     | 34         | 72    |    |
|                                   | 46      | 6           | 140      | 23         | 50       | 6           | 93       | 23         | 44       | 15         | 17    | 18         | 23    |    |
|                                   | 23      | 12          | 287      | 43         | 132      | 12          | 74       | 43         | 165      | 32         | 19    | 40         | 15    |    |
|                                   |         |             | 161      |            | 173      |             | 216      |            | 224      |            | 12    |            |       | 19 |
|                                   |         |             | 79       |            |          |             | 60       |            | 131      |            | 19    |            |       | 12 |
|                                   |         |             | 350      |            | 216      |             | 151      |            | 136      |            | 27    |            |       |    |
|                                   |         |             | 162      |            | 113      |             | 176      |            | 68       |            | 31    |            |       | 17 |
|                                   |         |             | 318      |            | 270      |             | 144      |            | 329      |            | 15    |            |       | 31 |
|                                   |         |             | 23       |            | 376      |             | 236      |            | 207      |            | 11    |            |       | 23 |
|                                   |         |             | 75       |            | 104      |             | 54       |            | 131      |            | 30    |            |       | 68 |
|                                   |         |             | 134      |            | 188      |             | 178      |            | 91       |            |       |            |       | 18 |
|                                   |         |             | 272      |            | 199      |             | 212      |            | 320      |            |       |            |       | 21 |
|                                   | Average | 30          | 24       | 179        | 30       | 199         | 24       | 147        | 30       | 172        | 25    | 19         | 31    | 29 |
| Background vs. Site               | p-value | 0.000253    |          | 0.000146   |          | 0.000309    |          | 0.000101   |          | 0.178      |       | 0.430      |       |    |
| vs. Lab Control                   | p-value | 0.374       | 0.000204 | 0.488      | 0.000142 | 0.374       | 0.000027 | 0.488      | 0.000101 | 0.328      | 0.151 | 0.476      | 0.463 |    |
| 0-9cm vs. 9-18cm                  | p-value | 0.327       |          |            |          | 0.227       |          |            |          | 0.082      |       |            |       |    |
| Open Burn vs. Open Dump (p-value) |         |             |          |            |          |             |          |            |          |            |       |            |       |    |
| Depth                             |         | 0-9cm       | 9-18cm   |            |          |             |          |            |          |            |       |            |       |    |
| Lodge Grass vs Crow Agency        |         | 0.188       | 0.257    |            |          |             |          |            |          |            |       |            |       |    |

## Analysis of Variance

| Source | DF | Adj SS | Adj MS | F-Value | P-Value |
|--------|----|--------|--------|---------|---------|
| Factor | 12 | 500712 | 41726  | 8.53    | 0.000   |
| Error  | 76 | 371552 | 4889   |         |         |
| Total  | 88 | 872264 |        |         |         |

Three outliers were identified:

- 692: Lodge Grass Site 9-18cm
- 123: Tuttle Site 0-9cm
- 195: Tuttle Site 9-18cm

These were omitted from further analysis.

Tuttle Site 9-18cm failed the normality test ( $p < 0.05$ ). This was included in further analysis but should be noted.

ANOVA indicated that at least one set of sample means was significantly different ( $p < 0.05$ ).

Four samples were determined to be significantly greater than the lab control (Lodge Grass Site and Crow Agency Site, both depths). All other samples were statistically identical in particle quantity to the lab control, indicating that these samples were below our level of quantification.



Four samples were determined to be significantly greater than the environmental control (Lodge Grass and Crow Agency, both depths). This indicates that these burn- and open dump sites are significant contributors to microplastic pollution in the local environment. No significant difference was observed for the Tuttle site, indicating that this site is not a significant contributor to microplastic pollution in the area. No significant differences were observed between depths for the same site. No significant differences were observed between open burn and open dump for either depth.
